# Supplementary material for: Determinants of pleiotropy and monotonic gene dosage responses across human traits
Source: Research Square preprint supplement (doi:10.21203/rs.3.rs-7547111/v1), 2025-11-19
Supplement: Supplementary file 1 [file 2e8abb4ea7250a421b75257a.xlsx]

## Sheet: ST_index
Table	Description
ST1	Demographics and summary of 43 complex traits analyzed from the UK Biobank
ST2	Functional burden association estimates for 43 complex traits and 172 gene sets
ST3	S-LDSC functional enrichments for trait GWASes across gene sets
ST4	Gene set statistics: functional pleiotropy, constraint measures, normative null model, and gene dosage responses
ST5	Jaccard overlap between all gene set pairs
ST6	Trait level statistics: variance explained, gene dosage responses, and del-dup overlap and correlations
ST7	Between trait correlations: CNV Burden correlations, SNV Burden correlations, genetic correlations (SNP), and phenotypic correlations
ST8	Statistics for comparing proportion of significant associations/enrichments between del, dup, and SNPs (Fig 2C-2E)
ST9	Statistics for comparing proportion of significant associations/enrichments between brain and non-brain gene sets for gene set categories and del, dup, and SNPs (Fig 2D)
ST10	Statistics for correlation and Jaccard overlap based p-values between constraint measures and del, dup, GWAS functional pleiotropy (Fig 3C)
ST11	Statistics for total least squares (TLS) regression slopes comparing between-trait correlations across pairs of variants (Fig 4C-E)
ST12	Statistics for comparing proportion of significant associations between brain and non-brain gene sets for sensitivity analysis (Fig S10)

## Sheet: ST_column_key
Table	Column_name	Column_description
ST1	Category	Trait category, one of the 5 categories: Cognitive Metric, Blood Assays, Mental Health, Physical measure, and Reproductive and Activity factors
ST1	Field number	UK biobank field ID
ST1	Trait name / Phenotype	Trait /phenotype name given in the UK Biobank
ST1	Phenotype Short Name	An abbreviated name (acronym) for the trait, used in the manuscript/figures.
ST1	Value-Type	The type of data for the trait (e.g., categorical, continuous)
ST1	Phenotype type	Phenotype type, either continous or binary; used to determine the type of regresison mode ( linear or logistic) used for model fitting
ST1	Number of Samples (After removing outliers, NA & CNV QC)	total sample size after quality control (for European ancestry)
ST1	N_Female	Number of female participants
ST1	N_Male	Number of male participants
ST1	Age-Mean	Mean age of participants
ST1	Age-Sd	standard deviation (sd) of age of participants
ST1	Age_Min	Min age of participants
ST1	Age_Max	Max age of participants
ST1	N_Del-Carriers	Number of deletion carriers
ST1	N_Dup-Carriers	Number of duplication carriers
ST1	Ancestry	Ancestry (Eurpean)
ST1	Assesment Type	Type of assessment, either center or online
ST1	Description	Detailed description of the phenotype
ST1	Ukbiobank_field_link	Link to the UK Biobank page for the phenotype
ST1	GWAS_ldsc_sumstats_NealeLab_wget	Link to UK Biobank GWAS summary statistics from NealeLab (Broad Institute), used in s-LDSC enrichments.
ST2	Trait	Trait / phenotype name
ST2	Trait_Cat	Trait category: either Brain or NonBrain
ST2	Geneset	Geneset name
ST2	Geneset_Type	Geneset type, with either of the three values: i) Tissue_Fantom60 (60 gene sets derived from whole body tissue RNAseq data from Fantom); ii) SC_HPA81 (81 gene sets derived from the whole body single cell RNAseq data from Human Protein Atlas, HPA); and iii) SC_Siletti31 (31 gene sets derived from Siletti et al. Science 2023, from whole brain single cell RNA seq data)
ST2	Geneset_Cat	Geneset category: either Brain or NonBrain
ST2	Geneset_SubCat	Geneset sub-category for Siletti whole brain cell types; either Neuron or NonNeuron
ST2	CNV_Type	CNV type (deletion or duplication)
ST2	Effectsize	Estimates from functional burden association for a given trait and gene-set pair
ST2	se	Standard error (SE) of the estimates from functional burden association for a given trait and gene-set pair
ST2	p_value	Significane (p-value) of the estimates from functional burden association for a given trait and gene-set pair
ST2	FDR_p_value	FDR corrected significane (q-value) of the estimates from functional burden association for a given trait and gene-set pair
ST3	Trait	Trait / phenotype name
ST3	Trait_FieldNumber	Trait / phenotype UK Biobank field ID
ST3	Trait_Cat	Trait category: either Brain or NonBrain
ST3	GeneSet	Geneset name
ST3	GeneSet_Type	Geneset type, with either of the three values: i) Tissue_Fantom60 (60 gene sets derived from whole body tissue RNAseq data from Fantom); ii) SC_HPA81 (81 gene sets derived from the whole body single cell RNAseq data from Human Protein Atlas, HPA); and iii) SC_Siletti31 (31 gene sets derived from Siletti et al. Science 2023, from whole brain single cell RNA seq data)
ST3	GeneSet_Cat	Geneset category: either Brain or NonBrain
ST3	Prop._SNPs	S-LDSC output proportion of SNPs
ST3	Prop._h2	S-LDSC output proportion of h2
ST3	Prop._h2_std_error	S-LDSC output proportion of h2 standard error
ST3	Enrichment	S-LDSC enrichment
ST3	Enrichment_std_error	S-LDSC enrichment standard error
ST3	Enrichment_p	S-LDSC enrichment p-value
ST3	Coefficient	S-LDSC enrichment coefficient
ST3	Coefficient_std_error	S-LDSC enrichment coefficient standard error
ST3	Coefficient_z.score	S-LDSC enrichment coefficient Z-score
ST3	Transformed_Pval	S-LDSC enrichment coefficient Z-score based p-value (1 - pnorm(Z-score))
ST4	Geneset	Geneset name
ST4	Geneset_Type	Geneset type, with either of the three values: i) Tissue_Fantom60 (60 gene sets derived from whole body tissue RNAseq data from Fantom); ii) SC_HPA81 (81 gene sets derived from the whole body single cell RNAseq data from Human Protein Atlas, HPA); and iii) SC_Siletti31 (31 gene sets derived from Siletti et al. Science 2023, from whole brain single cell RNA seq data)
ST4	Geneset_Cat	Geneset category: either Brain or NonBrain
ST4	Geneset_SubCat	Geneset sub-category for Siletti whole brain cell types; either Neuron or NonNeuron
ST4	constraint_measure_LEOUF_topdecile	Proportion of gene-set genes within top decile of LOEUF scores (the loss-of-function observed/expected upper bound fraction (LOEUF) score, gnomad v2.1)
ST4	constraint_measure_pLI_topdecile	Proportion of gene-set genes within top decile of pLI scores (probability of being loss-of-function intolerant, gnomad v2.1)
ST4	constraint_measure_missense_Z_topdecile	Proportion of gene-set genes within top decile of missense Z-score (gonmad v2.1)
ST4	constraint_measure_s_het_topdecile	Proportion of gene-set genes within top decile of S-het
ST4	constraint_measure_CDS_topdecile	Proportion of gene-set genes within top decile of CDS (percentage of coding sequence (CDS) under evolutionary constraint)
ST4	constraint_measure_pHaplo_topdecile	Proportion of gene-set genes within top decile of probability of haploinsufficiency (pHaplo), Collins et al. 2022
ST4	constraint_measure_pTriplo_topdecile	Proportion of gene-set genes within top decile of probability of triplosensitivity (pTriplo), Collins et al. 2022
ST4	constraint_measure_GeneLenBP	Mean gene-length in base pairs for the genes within gene set
ST4	functional_pleiotropy_deletion	functional pleiotropy for deletions (the number of traits significantly associated with a functional gene set)
ST4	functional_pleiotropy_duplication	functional pleiotropy for duplications (the number of traits significantly associated with a functional gene set)
ST4	functional_pleiotropy_GWASenrichment	functional pleiotropy for SNPS (the number of traits enriches (S-LDSC) with a functional gene set)
ST4	constraint	Measure of percentage of constraint within a gene-set, defined here as th proportion of gene-set genes within top decile of LOEUF scores (the loss-of-function observed/expected upper bound fraction (LOEUF) score, gnomad v2.1)
ST4	normative_model_null_mean_fp_del	Mean of functional pleiotropy for deletions (across 43 traits) based on 100 normative null models
ST4	normative_model_null_mean_fp_dup	Mean of functional pleiotropy for duplications (across 43 traits) based on 100 normative null models
ST4	normative_model_null_sd_fp_del	standard deviation of functional pleiotropy for deletions (across 43 traits) based on 100 normative null models
ST4	normative_model_null_sd_fp_dup	standard deviation of functional pleiotropy for duplications (across 43 traits) based on 100 normative null models
ST4	normative_model_zscore_del_pleiotropy	Z-score of deletion functional pleiotropy based on the mean and sd of the normative null models
ST4	normative_model_zscore_dup_pleiotropy	Z-score of duplication functional pleiotropy based on the mean and sd of the normative null models
ST4	normative_model_centile_del_pleiotropy	Centiles of deletion functional pleiotropy based on the mean and sd of the normative null models
ST4	normative_model_centile_dup_pleiotropy	Centiles of duplication functional pleiotropy based on the mean and sd of the normative null models
ST4	gene_dosage_responses_count_total	FDR significant gene dosage responses per gene set across 43 traits ( responses that showed an FDR significant association for either deletion or duplication, or both)
ST4	gene_dosage_responses_count_nonmonotonic	Number of non-monotonic gene dosage responses ( per gene set across 43 traits), i.e., same direction of effect sizes for deletions and duplications
ST4	gene_dosage_responses_count_monotonic	Number of monotonic gene dosage responses ( per gene set across 43 traits), i.e., opposing effect sizes for deletions and duplications
ST4	gene_dosage_responses_proportion_nonmonotonic	Proportion of non-monotonic gene dosage responses (out of the gene_dosage_responses_count_total)
ST4	gene_dosage_responses_proportion_monotonic	Proportion of monotonic gene dosage responses (out of the gene_dosage_responses_count_total)
ST5	Geneset1	Geneset 1 name for Jaccard overlap
ST5	Geneset2	Geneset 1 name for Jaccard overlap
ST5	Jaccard_Overlap	Jaccard overlap between geneset1 and geneset2
ST6	Trait	Trait / phenotype name
ST6	Trait_Cat	Trait category: either Brain or NonBrain
ST6	Del_VarianceExplained	Variance explained (R2, in percentage %) by deletions per trait (by 159 effective gene sets, after removal of overlapping gene sets)
ST6	Dup_VarianceExplained	Variance explained (R2, in percentage %) by duplications per trait (by 159 effective gene sets, after removal of overlapping gene sets)
ST6	gene_dosage_responses_count_total	FDR significant gene dosage responses per trait across gene-sets ( responses that showed an FDR significant association for either deletion or duplication, or both)
ST6	gene_dosage_responses_count_nonmonotonic	Number of non-monotonic gene dosage responses ( per trait across gene sets), i.e., same direction of effect sizes for deletions and duplications
ST6	gene_dosage_responses_count_monotonic	Number of monotonic gene dosage responses ( per trait across gene sets), i.e., opposing effect sizes for deletions and duplications
ST6	gene_dosage_responses_proportion_nonmonotonic	Proportion of non-monotonic gene dosage responses (out of the gene_dosage_responses_count_total)
ST6	gene_dosage_responses_proportion_monotonic	Proportion of monotonic gene dosage responses (out of the gene_dosage_responses_count_total)
ST6	count_del_dup_overlap	count of the overlap between deletions and duplications significant associations, i.e., gene-set trait associations FDR-significant for both deletions and duplications
ST6	pvalue_count_del_dup_overlap	p-value (permutaiton based) for the overlap between deletions and duplications, i.e., gene-set trait associations FDR-significant for both deletions and duplications
ST6	adj_pvalue_count_del_dup_overlap	FDR-corrected p-value (permutaiton based) for the overlap between deletions and duplications, i.e., gene-set trait associations FDR-significant for both deletions and duplications
ST6	count_del_sig_only	count of the deletions significant associations, i.e., gene-set trait associations FDR-significant for deletions only
ST6	count_dup_sig_only	count of the duplication significant associations, i.e., gene-set trait associations FDR-significant for duplications only
ST6	proportion_del_dup_bothsig	Proportion of the overlap between deletions and duplications significant associations (out of the gene_dosage_responses_count_total)
ST6	proportion_del_sig_only	Proportion of the deletion only significant associations (out of the gene_dosage_responses_count_total)
ST6	proportion_dup_sig_only	Proportion of the duplication only significant associations (out of the gene_dosage_responses_count_total)
ST6	cor_del_dup	Correlation between deletion and duplication effect size estimates
ST6	adj_JaccardPvalue_cor_del_dup	FDR-corrected p-value (Jaccard overlap based 1000 null profiles) for correlation between deletion and duplication effect size estimates
ST6	JaccardPvalue_DelDupCorr	p-value (Jaccard overlap based 1000 null profiles) for correlation between deletion and duplication effect size estimates
ST7	Trait1	Between trait correlations trait 1
ST7	Trait2	Between trait correlations trait 2
ST7	Pairs	Between trait correlations trait pair
ST7	Corr_DEL	Deletion burden correlation between trait pair
ST7	Corr_DUP	Duplication burden correlation between trait pair
ST7	Corr_Raw_JaccardPval_DEL	p-value (Jaccard overlap based 1000 null profiles) for deletion burden correlation between trait pair
ST7	Corr_Raw_JaccardPval_DUP	p-value (Jaccard overlap based 1000 null profiles) for duplication burden correlation between trait pair
ST7	Corr_FDR_JaccardPval_DEL	FDR-corrected p-value (Jaccard overlap based 1000 null profiles) for deletion burden correlation between trait pair
ST7	Corr_FDR_JaccardPval_DUP	FDR-corrected p-value (Jaccard overlap based 1000 null profiles) for duplication burden correlation between trait pair
ST7	Corr_SNP	Genetic correlation between trait pair (from NealeLab, Broad Institute)
ST7	Corr_SNV	Loss of function SNV burden correlation between trait pair (Weiner et al. Nature 2023)
ST7	Corr_Pheno	Phenotypic correlation between trait pair
ST7	Include_In_DEL_DUP_Corr	Binary flag if the trait pair is inlcuded in the final supplement figure or discarded (if correlations are above 1)
ST7	Include_In_SNP_DEL_Corr	Binary flag if the trait pair is inlcuded in the final supplement figure or discarded (if correlations are above 1 or one of the correlations is missing)
ST7	Include_In_SNP_DUP_Corr	Binary flag if the trait pair is inlcuded in the final supplement figure or discarded (if correlations are above 1 or one of the correlations is missing)
ST7	Include_In_SNV_DEL_Corr	Binary flag if the trait pair is inlcuded in the final supplement figure or discarded (if correlations are above 1 or one of the correlations is missing)
ST7	Include_In_SNV_DUP_Corr	Binary flag if the trait pair is inlcuded in the final supplement figure or discarded (if correlations are above 1 or one of the correlations is missing)
ST7	Include_In_SNP_SNV_Corr	Binary flag if the trait pair is inlcuded in the final supplement figure or discarded (if correlations are above 1 or one of the correlations is missing)
ST8	Geneset_Type	Geneset type, with either of the three values: i) Tissue_Fantom60 (60 gene sets derived from whole body tissue RNAseq data from Fantom); ii) SC_HPA81 (81 gene sets derived from the whole body single cell RNAseq data from Human Protein Atlas, HPA); and iii) SC_Siletti31 (31 gene sets derived from Siletti et al. Science 2023, from whole brain single cell RNA seq data)
ST8	Type1	First genetic variant type being compared (e.g., SNP, Del, Dup)
ST8	Type2	Second genetic variant type being compared.
ST8	p_value	Raw p-value from the proportion test comparing proportions between Type1 and Type2
ST8	statistic	Test statistic from the proportion test
ST8	estimate_prop_Type1	proportion of associations in genetic variant 1
ST8	estimate_prop_Type2	proportion of associations in genetic variant 2
ST8	p_value_fdr	Adjusted p-value for multiple testing (FDR)
ST9	Type	CNV type (deletion or duplication)
ST9	Geneset_Type	Geneset type, with either of the three values: i) Tissue_Fantom60 (60 gene sets derived from whole body tissue RNAseq data from Fantom); ii) SC_HPA81 (81 gene sets derived from the whole body single cell RNAseq data from Human Protein Atlas, HPA); and iii) SC_Siletti31 (31 gene sets derived from Siletti et al. Science 2023, from whole brain single cell RNA seq data)
ST9	p_value	Raw p-value from the proportion test comparing brain vs. non-brain prop
ST9	statistic	The test statistic from the proportion test
ST9	estimate_prop_Brain	Proportion of associations in brain-related tissues/cell types
ST9	estimate_prop_NonBrain	Proportion of associations in non brain-related tissues/cell types
ST9	p_value_fdr	Adjusted p-value for multiple testing (FDR)
ST10	stat	The type of functional pleiotropy or enrichment analysis being performed
ST10	constraint	The specific gene constraint measure being tested
ST10	cor	Correlation coefficient between the functional pleiotropy and the given constraint measure
ST10	pvalue_Jaccard	Raw p-value (P-Jaccard)
ST10	adj_pvalue_Jaccard	Adjusted p-value (P-Jaccard) (FDR)
ST11	Variants / Stats	The pair of variant classes being compared
ST11	N_Traits	Number of traits included in the analysis for that variant comparison.
ST11	N_Pairs (without NA)	Number of trait pairs with valid (non-missing) values used in the concordance tests
ST11	TLS_Coef	Slope from the Total Least Squares (TLS) regression between effect sizes of the two variant types. A value close to 1 indicates strong concordance
ST11	t-stats	Test statistic from the TLS regression assessing whether the slope is significantly different from 0
ST11	p-value	p-value for the TLS slope test; <0.05 indicates a significant nonzero concordance slope
ST11	Sign Concordance	Percentage of trait pairs where the two variant types show the same direction of effect
ST11	Sign Discordance	Percentage of trait pairs where the two variant types show opposite directions of effect
ST11	Mantel_statistic_r	Correlation coefficient from the Mantel test comparing distance matrices of trait effects between the two variant types
ST11	Mantel_Significance	Permutation-based p-value from the Mantel test; indicates whether the correlation is statistically significant
ST11	rho.c_est	Lin’s Concordance Correlation Coefficient (CCC) estimate; measures agreement by combining accuracy and precision (range: –1 to 1, with 1 = perfect concordance).
ST11	rho.c_lwr.ci	ower bound of the 95% confidence interval for the CCC.
ST11	rho.c_upr.ci	Upper bound of the 95% confidence interval for the CCC
ST11	C.b	Bias correction factor from CCC; indicates how far the TLS regression line deviates from the 45° line of perfect concordance (values closer to 1 = less bias).
ST12	CNV_Type	CNV type (deletion or duplication)
ST12	Sensitivity_Cat	Sensitivity subgroup used for stratification
ST12	GeneSetCat1	First gene set category in the comparison
ST12	GeneSetCat2	Second gene set category in the comparison
ST12	p_value_fdr	Adjusted p-value (FDR) from the proportion test comparing Brain vs NonBrain tissues.
ST12	Proportion	Proportion of associations in Brain or NonBrain related tissues
ST12	GenesetCat	Geneset category: either Brain or NonBrain
ST12	Sensitivity_Type	Type of sensitivity analysis
ST12	CNV_SensCat	Combination label summarizing the CNV type and subgroup- Used for Figure Creation
ST12	signp	Marker for statistical significance of the FDR-adjusted p-value- Used for Figure Creation
ST12	sigloc	Adjusted proportion value shifted for plotting- Used for Figure Creation

## Sheet: ST1
Category	Field number	Trait / Phenotype	Phenotype Short Name	Value-Type	Phenotype type	Number of Samples (After removing outliers, NA & CNV QC)	N_Female	N_Male	Age-Mean	Age-Sd	Age_Min	Age_Max	N_Del-Carriers	N_Dup-Carriers	Ancestry	Assesment Type	Description	Ukbiobank_field_link	GWAS_ldsc_sumstats_NealeLab_wget
Cognitive Metrics	20016	Fluid intelligence score	FI	Integer, count	Continues	187436	100516	86920	59	9	40	85	43270	27342	European	Center	The capacity to solve problems that require logic and reasoning ability, independent of acquired knowledge	https://biobank.ctsu.ox.ac.uk/ukb/field.cgi?id=20016	https://www.dropbox.com/s/azf9v4elbt4ecyy/20016_irnt.ldsc.imputed_v3.both_sexes.tsv.bgz?dl=0 -O 20016_irnt.ldsc.imputed_v3.both_sexes.tsv.bgz
Cognitive Metrics	20023	Mean time to correctly identify matches (Reaction Time)	Reaction	Integer, milliseconds	Continues	432764	235128	197636	57	8	39	82	99917	63426	European	Center	The test to assess reaction time: Participants are shown two cards at a time on the touch-screen and instructed to press the button on the button box as quickly as possible when the symbols on the cards match. This exercise involves 12 pairs of cards. The mean time taken to correctly identify matches is stored.	https://biobank.ctsu.ox.ac.uk/ukb/field.cgi?id=20023	https://www.dropbox.com/s/pw3530rf0bm5tmk/20023_irnt.ldsc.imputed_v3.both_sexes.tsv.bgz?dl=0 -O 20023_irnt.ldsc.imputed_v3.both_sexes.tsv.bgz
Cognitive Metrics	399	Number of incorrect matches in round-Visuospatial Working Memory	VSWM1	Integer	Continues	402906	220019	182887	57	8	39	73	92999	59104	European	Center	Pairs matching test: Participants are asked to memorise the position of as many matching pairs of cards as possible. The cards are then turned face down on the screen and the participant is asked to touch as many pairs as possible in the fewest tries. 3 rounds: 3 pairs, 6 pairs and 6 pairs in first, second and third round.	https://biobank.ctsu.ox.ac.uk/ukb/field.cgi?id=399	https://www.dropbox.com/s/fn9siwk43adtl5d/399_irnt.ldsc.imputed_v3.both_sexes.tsv.bgz?dl=0 -O 399_irnt.ldsc.imputed_v3.both_sexes.tsv.bgz
Cognitive Metrics	400	Time to complete round	VSWM2	Integer, deciseconds	Continues	424617	231064	193553	57	8	39	73	98013	62227	European	Center	Time to complete the pair matching in a round	https://biobank.ctsu.ox.ac.uk/ukb/field.cgi?id=400	https://www.dropbox.com/s/b5xatb2oiswe9zm/400_irnt.ldsc.imputed_v3.both_sexes.tsv.bgz?dl=0 -O 400_irnt.ldsc.imputed_v3.both_sexes.tsv.bgz
Cognitive Metrics	20156 (instance 1)	Trail Making 1	TrailMaking1	Continues, seconds	Continues	138361	79311	59050	65	8	44	84	31573	20004	European	Online	Duration to complete numeric path / The participant was presented with sets of digits in circles scattered around the screen and asked to click on them sequentially according to a specific algorithm.	https://biobank.ctsu.ox.ac.uk/ukb/field.cgi?id=20156
Cognitive Metrics	20157 (instance 2)	Trail Making 2	TrailMaking2	Continues, seconds	Continues	128494	72999	55495	65	8	44	84	29364	18573	European	Online	Duration to complete alphanumeric path / The participant was presented with sets of letters in circles scattered around the screen and asked to click on them sequentially according to a specific algorithm.	https://biobank.ctsu.ox.ac.uk/ukb/field.cgi?id=20157
Cognitive Metrics	23324 / 20159	Symbol digit substitution	SymbolDigit	Integer, correct-answers	Continues	141766	81178	60588	65	8	44	84	32390	20480	European	Online	Number of symbol digit matches made correctly / The participant was presented with one grid linking symbols to single-digit integers and a second grid containing only the symbols. They were then asked to indicate the numbers attached to each of the symbols in the second grid using the first one as a key.	https://biobank.ctsu.ox.ac.uk/ukb/field.cgi?id=23324
Cognitive Metrics	189 (22189)	Townsend Deprivation Index at recruitment	TDI	Continuous	Continues	435820	236704	199116	57	8	39	73	100652	63906	European	Center	Each participant is assigned a score corresponding to the output area in which their postcode is located. Higher scores indicating higher levels of deprivation.	https://biobank.ctsu.ox.ac.uk/ukb/field.cgi?id=189	https://www.dropbox.com/s/inizbjh1onra1pc/189_irnt.ldsc.imputed_v3.both_sexes.tsv.bgz?dl=0 -O 189_irnt.ldsc.imputed_v3.both_sexes.tsv.bgz
Cognitive Metrics	6138	Educational Attaintment	EA	categorical(multiple) => integer, years	Continues	431666	234551	197115	57	8	39	73	99653	99653	European	Center	ACE touchscreen question "Which of the following qualifications do you have? (Converted to the number of years for studying)	https://biobank.ctsu.ox.ac.uk/ukb/field.cgi?id=6138
Mental Health	20127	Neuroticism score	Neuroticism	Integer	Continues	352799	188854	163945	57	8	39	73	81134	51769	European	Center	Participants were assessed for twelve domains of neurotic behaviours via the touchscreen questionnaire; This field summarises the number of Yes answers across these twelve questions into a single integer score for each participant.	https://biobank.ctsu.ox.ac.uk/ukb/field.cgi?id=20127	https://www.dropbox.com/s/f9e62uz7eygfwnx/20127_irnt.ldsc.imputed_v3.both_sexes.tsv.bgz?dl=0 -O 20127_irnt.ldsc.imputed_v3.both_sexes.tsv.bgz
Mental Health	20002Depression (1286)	Non-cancer illness code, self-reported/Depression	Depression	Binary	Binary	436290(25075/411215)	236952	199338	57	8	39	73	100776	63994	European	Center	Self Depression Report	https://biobank.ctsu.ox.ac.uk/ukb/field.cgi?id=20002	https://www.dropbox.com/s/ghxu09rs5ya69hv/20002_1286.ldsc.imputed_v3.both_sexes.tsv.bgz?dl=0 -O 20002_1286.ldsc.imputed_v3.both_sexes.tsv.bgz
Mental Health	2090	Seen a GP for nerves, anxiety, tension or depression	GP	Binary	Binary	433082(149577/283505)	235032	198050	57	8	39	73	100035	63507	European	Center	ACE touchscreen question "Have you ever seen a general practitioner (GP) for nerves, anxiety, tension or depression?"	https://biobank.ctsu.ox.ac.uk/ukb/field.cgi?id=2090	https://www.dropbox.com/s/lrjyz7wrgioqo1l/2090.ldsc.imputed_v3.both_sexes.tsv.bgz?dl=0 -O 2090.ldsc.imputed_v3.both_sexes.tsv.bgz
Mental Health	2040	Risk Taking	RiskTaking	Binary	Binary	420527(110510/310017)	227772	192755	57	8	39	73	97137	61652	European	Center	ACE touchscreen question "Would you describe yourself as someone who takes risks?"	https://biobank.ctsu.ox.ac.uk/ukb/field.cgi?id=2040	https://www.dropbox.com/s/qn4wkib5f0gl94z/2040.ldsc.imputed_v3.both_sexes.tsv.bgz?dl=0 -O 2040.ldsc.imputed_v3.both_sexes.tsv.bgz
Mental Health	1920	MoodSwings	MoodSwings	Binary	Binary	425561(192755/232806)	231317	194244	57	8	39	73	98216	62380	European	Center	ACE touchscreen question "Does your mood often go up and down?"	https://biobank.ctsu.ox.ac.uk/ukb/field.cgi?id=1920	https://www.dropbox.com/s/izsj9dlgpfd28jf/1920.ldsc.imputed_v3.both_sexes.tsv.bgz?dl=0 -O 1920.ldsc.imputed_v3.both_sexes.tsv.bgz
Mental Health	2020	Loneliness	Loneliness	Binary	Binary	429127(77778/351349)	232906	196221	57	8	39	73	99067	62909	European	Center	ACE touchscreen question "Do you often feel lonely?"	https://biobank.ctsu.ox.ac.uk/ukb/field.cgi?id=2020	https://www.dropbox.com/s/cj19ga2t82z9lcz/2020.ldsc.imputed_v3.both_sexes.tsv.bgz?dl=0 -O 2020.ldsc.imputed_v3.both_sexes.tsv.bgz
Mental Health	1930	Miserableness	Miserableness	Binary	Binary	428730(184308/244422)	233047	195683	57	8	39	73	98985	62832	European	Center	ACE touchscreen question "Do you ever feel 'just miserable' for no reason?"	https://biobank.ctsu.ox.ac.uk/ukb/field.cgi?id=1930	https://www.dropbox.com/s/58ql3a4ci5ey3ea/1930.ldsc.imputed_v3.both_sexes.tsv.bgz?dl=0 -O 1930.ldsc.imputed_v3.both_sexes.tsv.bgz
Mental Health	1940	Irritability	Irritability	Binary	Binary	416654 (117692 / 298962)	225987	190667	57	8	39	73	96106	61058	European	Center	ACE touchscreen question "Are you an irritable person?"	https://biobank.ctsu.ox.ac.uk/ukb/field.cgi?id=1940	https://www.dropbox.com/s/gg08yvdbrdjdfbj/1940.ldsc.imputed_v3.both_sexes.tsv.bgz?dl=0 -O 1940.ldsc.imputed_v3.both_sexes.tsv.bgz
Mental Health	2030	Guilty feelings	GuiltyFeelings	Binary	Binary	424737(122110/302627)	230387	194350	57	8	39	73	97992	62197	European	Center	ACE touchscreen question "Are you often troubled by feelings of guilt?"	https://biobank.ctsu.ox.ac.uk/ukb/field.cgi?id=2030	https://www.dropbox.com/s/ttla6hqvkd3dslq/2030.ldsc.imputed_v3.both_sexes.tsv.bgz?dl=0 -O 2030.ldsc.imputed_v3.both_sexes.tsv.bgz
Mental Health	--	Mood/Anxiety Factort	MoodAnxiety	Continues, factor	Continues	385359	207,972	177387	57	8	39	73	89,071	56,557	European	Center	Calculated based on 16 psychopathological factors in UKBB (Mollon J, Schultz LM, Huguet G, et al. Impact of copy number variants and polygenic risk scores on psychopathology in the UK Biobank , 2023).
Physical Measure	20002Hypertention (1065)	Non-cancer illness code, self-reported/Hypertention	Hypertention	Binary	Binary	436290(112824/323466)	236952	199338	57	8	39	73	100776	63994	European	Center	Tree-structured list used by clinic nurses to code non-cancer illness	https://biobank.ctsu.ox.ac.uk/ukb/field.cgi?id=20002	https://www.dropbox.com/s/t4esl72wlzvcpeh/20002_1065.ldsc.imputed_v3.both_sexes.tsv.bgz?dl=0 -O 20002_1065.ldsc.imputed_v3.both_sexes.tsv.bgz
Physical Measure	21001	BMI	BMI	Continuous, Kg/m2	Continues	434741	236142	198599	57	8	39	73	100380	63750	European	Center	Body mass index; the function of height and weight	https://biobank.ctsu.ox.ac.uk/ukb/field.cgi?id=21001	https://www.dropbox.com/s/iosq5liwda3gvca/21001_irnt.ldsc.imputed_v3.both_sexes.tsv.bgz?dl=0 -O 21001_irnt.ldsc.imputed_v3.both_sexes.tsv.bgz
Physical Measure	78	BMD T-score	BMD	Continuous, Std.Devs	Continues	250386	136234	114152	57	8	39	73	57885	36633	European	Center	Heel bone mineral density (BMD) T-score, automated - This T-score is calculated from the ultrasound heel BMD measurement and is based on a person's bone density compared with what is normally expected in someone of the same sex. The units of the T-score are the number of standard deviations (SD) that the bone density is above or below the standard.	https://biobank.ctsu.ox.ac.uk/ukb/field.cgi?id=78	https://www.dropbox.com/s/z1ulgzhr3cbbmrs/78_irnt.ldsc.imputed_v3.both_sexes.tsv.bgz?dl=0 -O 78_irnt.ldsc.imputed_v3.both_sexes.tsv.bgz
Physical Measure	3063	Forced expiratory volume in 1-second (FEV1)	FEV1	Continuous, litres	Continues	397689	217531	180158	57	8	39	73	91715	58342	European	Center	FEV1 value calculated from blow	https://biobank.ctsu.ox.ac.uk/ukb/field.cgi?id=3063	https://www.dropbox.com/s/inw5pqv959eafzy/3063_irnt.ldsc.imputed_v3.both_sexes.tsv.bgz?dl=0 -O 3063_irnt.ldsc.imputed_v3.both_sexes.tsv.bgz
Physical Measure	50	Standing height	StandingHeight	Continuous, cm	Continues	435302	236468	198834	57	8	39	73	100533	63844	European	Center	Standing height was measured using a Seca 202 device	https://biobank.ctsu.ox.ac.uk/ukb/field.cgi?id=50	https://www.dropbox.com/s/clygq1yvw3v6c96/50_irnt.ldsc.imputed_v3.both_sexes.tsv.bgz?dl=0 -O 50_irnt.ldsc.imputed_v3.both_sexes.tsv.bgz
Physical Measure	3062	Forced vital capacity (FVC)	FVC	Continuous, litres	Continues	397615	217500	180115	57	8	39	73	91698	58332	European	Center	FVC value calculated from blow	https://biobank.ctsu.ox.ac.uk/ukb/field.cgi?id=3062	https://www.dropbox.com/s/0h7koyiu7m5k3fi/3062_irnt.ldsc.imputed_v3.both_sexes.tsv.bgz?dl=0 -O 3062_irnt.ldsc.imputed_v3.both_sexes.tsv.bgz
Physical Measure	20022	Birth Weight	BirthWeight	Continuous, Kg	Continues	247049	150604	96445	55	8	39	70	56812	36205	European	Center	Participants were asked to enter their own birth-weight.	https://biobank.ctsu.ox.ac.uk/ukb/field.cgi?id=20022	https://www.dropbox.com/s/q2mk6nnvfek2pgw/20022_irnt.ldsc.imputed_v3.both_sexes.tsv.bgz?dl=0 -O 20022_irnt.ldsc.imputed_v3.both_sexes.tsv.bgz
Physical Measure	102	Heart Rate	HeartRate	Integer, bpm	Continues	407698	221219	186479	57	8	39	73	94389	59829	European	Center	This is the pulse rate measured during the automated blood pressure readings.	https://biobank.ctsu.ox.ac.uk/ukb/field.cgi?id=102	https://www.dropbox.com/s/n13tgdq8uqfdx9e/102_irnt.ldsc.imputed_v3.both_sexes.tsv.bgz?dl=0 -O 102_irnt.ldsc.imputed_v3.both_sexes.tsv.bgz
Blood Assays	30010	Red blood cell (erythrocyte) count	Redblood	Continuous, 10^12 cells/Litre	Continues	423168	229358	193810	57	8	39	73	97748	62110	European	Center	Result of "Red Blood Cell Count" assay, performed on blood sample, obtained from UK Biobank assessment centre visit. Red blood cells is the number of erythrocytes. Analyser operating range was 0 to 2x10^13 cells/Litre.	https://biobank.ctsu.ox.ac.uk/ukb/field.cgi?id=30010	https://www.dropbox.com/s/8bqu78269eret49/30010_irnt.ldsc.imputed_v3.both_sexes.tsv.bgz?dl=0 -O 30010_irnt.ldsc.imputed_v3.both_sexes.tsv.bgz
Blood Assays	30080	Platelet count	Platelet	Continuous, 10^9 cells/Litre	Continues	423024	229271	193753	57	8	39	73	97719	62090	European	Center	Result of "Platelet Count" assay, performed on blood sample, obtained from UK Biobank assessment centre visit. Platelet count is the number of thrombocytes derived from the platelet histogram.	https://biobank.ctsu.ox.ac.uk/ukb/field.cgi?id=30080	https://www.dropbox.com/s/1zsjlu9ly2muq28/30080_irnt.ldsc.imputed_v3.both_sexes.tsv.bgz?dl=0 -O 30080_irnt.ldsc.imputed_v3.both_sexes.tsv.bgz
Blood Assays	30680	Calcium	Calcium	Continuous, mmol/L	Continues	380751	205170	175581	57	8	39	73	87709	56131	European	Center	Measured by Arsenazo III analysis on a Beckman Coulter AU5800	https://biobank.ctsu.ox.ac.uk/ukb/field.cgi?id=30680	https://www.dropbox.com/s/2b1clcqvi062dnb/30680_irnt.imputed_v3.ldsc.both_sexes.tsv.gz?dl=0 -O 30680_irnt.imputed_v3.ldsc.both_sexes.tsv.gz
Blood Assays	30780	LDL direct	LDL	Continuous, mmol/L	Continues	415180	225416	189764	57	8	39	73	95858	61000	European	Center	Measured by enzymatic protective selection analysis on a Beckman Coulter AU5800	https://biobank.ctsu.ox.ac.uk/ukb/field.cgi?id=30780	https://www.dropbox.com/s/fk0th6tarp8q3e5/30780_irnt.imputed_v3.ldsc.both_sexes.tsv.gz?dl=0 -O 30780_irnt.imputed_v3.ldsc.both_sexes.tsv.gz
Blood Assays	30690	Cholesterol	Cholesterol	Continuous, mmol/L	Continues	415956	225790	190166	57	8	39	73	96032	61094	European	Center	Measured by CHO-POD analysis on a Beckman Coulter AU5800	https://biobank.ctsu.ox.ac.uk/ukb/field.cgi?id=30690	https://www.dropbox.com/s/0tejvvqanhflsvf/30690_irnt.imputed_v3.ldsc.both_sexes.tsv.gz?dl=0 -O 30690_irnt.imputed_v3.ldsc.both_sexes.tsv.gz
Blood Assays	30750	Glycated haemoglobin (HbA1c)	HbA1c	Continuous, mmol/mol	Continues	414447	225326	189121	57	8	39	73	95695	60837	European	Center	Measured by HPLC analysis on a Bio-Rad VARIANT II Turbo	https://biobank.ctsu.ox.ac.uk/ukb/field.cgi?id=30750	https://www.dropbox.com/s/cfrt02rb88witz2/30750_irnt.imputed_v3.ldsc.both_sexes.tsv.gz?dl=0 -O 30750_irnt.imputed_v3.ldsc.both_sexes.tsv.gz
Blood Assays	30770	IGF-1	IGF1	Continuous, nmol/L	Continues	413606	224518	189088	57	8	39	73	95503	60775	European	Center	Measured by CLIA analysis on a DiaSorin Ltd. LIASON XL	https://biobank.ctsu.ox.ac.uk/ukb/field.cgi?id=30770	https://www.dropbox.com/s/g9kwnjnuw8lybas/30770_irnt.imputed_v3.ldsc.both_sexes.tsv.gz?dl=0 -O 30770_irnt.imputed_v3.ldsc.both_sexes.tsv.gz
Blood Assays	30600	Albumin	Albumin	Continuous, g/L	Continues	380969	205307	175662	57	8	39	73	87754	56169	European	Center	Measured by BCG analysis on a Beckman Coulter AU5800	https://biobank.ctsu.ox.ac.uk/ukb/field.cgi?id=30600	https://www.dropbox.com/s/xpg0g5r5e37ilj5/30600_irnt.imputed_v3.ldsc.both_sexes.tsv.gz?dl=0 -O 30600_irnt.imputed_v3.ldsc.both_sexes.tsv.gz
Blood Assays	30730	Gamma glutamyltransferase	Gamma	Continuous, U/L	Continues	414067	225158	188909	57	8	39	73	95587	60820	European	Center	Measured by IFCC analysis on a Beckman Coulter AU5800	https://biobank.ctsu.ox.ac.uk/ukb/field.cgi?id=30730	https://www.dropbox.com/s/ryy7fhwoafyzwyg/30730_irnt.imputed_v3.ldsc.both_sexes.tsv.gz?dl=0 -O 30730_irnt.imputed_v3.ldsc.both_sexes.tsv.gz
Blood Assays	30740	Glucose	Glucose	Continuous, mmol/L	Continues	378516	204380	174136	57	8	39	73	87173	55757	European	Center	Measured by hexokinase analysis on a Beckman Coulter AU5800	https://biobank.ctsu.ox.ac.uk/ukb/field.cgi?id=30740	https://www.dropbox.com/s/9zuen4u9ikity1q/30740_irnt.imputed_v3.ldsc.both_sexes.tsv.gz?dl=0 -O 30740_irnt.imputed_v3.ldsc.both_sexes.tsv.gz
Blood Assays	30760	HDL cholesterol	HDL	Continuous, mmol/L	Continues	380787	205223	175564	57	8	39	73	87725	56137	European	Center	Measured by enzyme immunoinhibition analysis on a Beckman Coulter AU5800	https://biobank.ctsu.ox.ac.uk/ukb/field.cgi?id=30760	https://www.dropbox.com/s/qu1qp9pvket42m6/30760_irnt.imputed_v3.ldsc.both_sexes.tsv.gz?dl=0 -O 30760_irnt.imputed_v3.ldsc.both_sexes.tsv.gz
Blood Assays	30870	Triglycerides	Triglycerides	Continuous, mmol/L	Continues	415045	225574	189471	57	8	39	73	95802	60963	European	Center	Measured by GPO-POD analysis on a Beckman Coulter AU5800	https://biobank.ctsu.ox.ac.uk/ukb/field.cgi?id=30870	https://www.dropbox.com/s/trurm9n3nkaki2z/30870_irnt.imputed_v3.ldsc.both_sexes.tsv.gz?dl=0 -O 30870_irnt.imputed_v3.ldsc.both_sexes.tsv.gz
Reproductive and Activity Factors	2149	Lifetime number of sexual partners	SexPartners	Integer	Continues	395555	213258	182297	56	8	39	73	91085	57851	European	Center	ACE touchscreen question "About how many sexual partners have you had in your lifetime?"	https://biobank.ctsu.ox.ac.uk/ukb/field.cgi?id=2149	https://www.dropbox.com/s/xkqz2am9ylhhouv/2149.ldsc.imputed_v3.both_sexes.tsv.bgz?dl=0 -O 2149.ldsc.imputed_v3.both_sexes.tsv.bgz
Reproductive and Activity Factors	3581	Menopause	Menopause	Integer, years	Continues	135681	135681	0	60	5	40	71	31049	19342	European	Center	ACE touchscreen question "How old were you when your periods stopped?"	https://biobank.ctsu.ox.ac.uk/ukb/field.cgi?id=3581	https://www.dropbox.com/s/ztvyyd905c3c5bx/3581_irnt.ldsc.imputed_v3.both_sexes.tsv.bgz?dl=0 -O 3581_irnt.ldsc.imputed_v3.both_sexes.tsv.bgz
Reproductive and Activity Factors	2714	Menarche	Menarche	Integer, years	Continues	230077	230077	0	57	8	39	71	52922	33432	European	Center	ACE touchscreen question "How old were you when your periods started?"	https://biobank.ctsu.ox.ac.uk/ukb/field.cgi?id=2714	https://www.dropbox.com/s/u3jw5sgeyiuey49/2714.ldsc.imputed_v3.female.tsv.bgz?dl=0 -O 2714.ldsc.imputed_v3.female.tsv.bgz
Reproductive and Activity Factors	22040	Summed MET minutes per week for all activity	MET	Continuous, minutes/week	Continues	338911	176224	162687	56	8	39	73	77894	49235	European	Center	Physical activities are rated using METs to indicate their intensity. Total Metabolic Equivalent Task (MET) minutes per week for all activity including walking, moderate and vigorous activity are measured for the participants. MET is the function of the oxygen used by a person in milliliters per minute per kilogram body mass.	https://biobank.ctsu.ox.ac.uk/ukb/field.cgi?id=22040
Cognitive Metrics	20191	Fluid intelligence score_Online(Replication)	FI	Integer, count	Continues	83421	48141	35280	65	8	45	84	18999	12076	European	Online	The capacity to solve problems that require logic and reasoning ability, independent of acquired knowledge

## Sheet: ST2
Trait	Trait_Cat	Geneset	Geneset_Type	Geneset_Cat	Geneset_SubCat	CNV_Type	Effectsize	se	p_value	FDR_p_value
Albumin	NonBrain	caudate	Tissue_Fantom60	Brain		DEL	-0.0449692	0.0137242	0.00105064	0.0117522
BirthWeight	NonBrain	caudate	Tissue_Fantom60	Brain		DEL	9.91e-05	0.0175724	0.995502	0.997878
BMD	NonBrain	caudate	Tissue_Fantom60	Brain		DEL	-0.00293037	0.0166075	0.859942	0.938532
BMI	NonBrain	caudate	Tissue_Fantom60	Brain		DEL	0.0329446	0.0129528	0.0109769	0.0666817
Calcium	NonBrain	caudate	Tissue_Fantom60	Brain		DEL	-0.00601045	0.0139194	0.665883	0.835679
Cholesterol	NonBrain	caudate	Tissue_Fantom60	Brain		DEL	-0.0242377	0.0131564	0.0654353	0.220784
FEV1	NonBrain	caudate	Tissue_Fantom60	Brain		DEL	-0.0502035	0.00996293	4.68e-07	2.06e-05
FVC	NonBrain	caudate	Tissue_Fantom60	Brain		DEL	-0.051994	0.00965883	7.33e-08	3.9e-06
Gamma	NonBrain	caudate	Tissue_Fantom60	Brain		DEL	0.0144632	0.0124993	0.247224	0.499786
Glucose	NonBrain	caudate	Tissue_Fantom60	Brain		DEL	-0.000792742	0.0138047	0.954206	0.980986
HbA1c	NonBrain	caudate	Tissue_Fantom60	Brain		DEL	0.0245967	0.0126358	0.0515839	0.189573
HDL	NonBrain	caudate	Tissue_Fantom60	Brain		DEL	-0.0212412	0.0126616	0.0934258	0.278339
IGF1	NonBrain	caudate	Tissue_Fantom60	Brain		DEL	-0.024964	0.0129077	0.0531088	0.193351
LDL	NonBrain	caudate	Tissue_Fantom60	Brain		DEL	-0.0261489	0.0133468	0.0500913	0.185981
Neuroticism	Brain	caudate	Tissue_Fantom60	Brain		DEL	0.0254154	0.0144797	0.0792183	0.25062
Platelet	NonBrain	caudate	Tissue_Fantom60	Brain		DEL	0.00689506	0.0128194	0.590674	0.793066
Reaction	Brain	caudate	Tissue_Fantom60	Brain		DEL	0.0175031	0.0122621	0.153462	0.379221
Redblood	NonBrain	caudate	Tissue_Fantom60	Brain		DEL	0.00606249	0.0112595	0.590278	0.792906
StandingHeight	NonBrain	caudate	Tissue_Fantom60	Brain		DEL	-0.0249981	0.00913852	0.00622957	0.0443226
TDI	Brain	caudate	Tissue_Fantom60	Brain		DEL	0.0177249	0.0127731	0.165237	0.397067
Triglycerides	NonBrain	caudate	Tissue_Fantom60	Brain		DEL	0.0144072	0.0129783	0.266959	0.521494
EA	Brain	caudate	Tissue_Fantom60	Brain		DEL	-0.0320691	0.0128699	0.0127104	0.0742982
FI	Brain	caudate	Tissue_Fantom60	Brain		DEL	0.00523407	0.0166328	0.753002	0.88481
HeartRate	NonBrain	caudate	Tissue_Fantom60	Brain		DEL	0.00228054	0.0135639	0.866479	0.941523
MET	NonBrain	caudate	Tissue_Fantom60	Brain		DEL	-0.00876823	0.0150947	0.561321	0.776059
SexPartners	NonBrain	caudate	Tissue_Fantom60	Brain		DEL	-0.00113051	0.0135232	0.933376	0.971923
SymbolDigit	Brain	caudate	Tissue_Fantom60	Brain		DEL	-0.00427296	0.0210108	0.838846	0.927994
TrailMaking1	Brain	caudate	Tissue_Fantom60	Brain		DEL	-0.0153076	0.0243296	0.529234	0.755701
TrailMaking2	Brain	caudate	Tissue_Fantom60	Brain		DEL	-0.00706401	0.0236867	0.76553	0.891057
VSWM1	Brain	caudate	Tissue_Fantom60	Brain		DEL	0.0210183	0.0133191	0.114554	0.317258
VSWM2	Brain	caudate	Tissue_Fantom60	Brain		DEL	0.00221442	0.0126827	0.861392	0.939308
Menarche	NonBrain	caudate	Tissue_Fantom60	Brain		DEL	0.0109427	0.0184093	0.552237	0.768962
Menopause	NonBrain	caudate	Tissue_Fantom60	Brain		DEL	-0.0300135	0.0239272	0.20971	0.457257
Depression	Brain	caudate	Tissue_Fantom60	Brain		DEL	-0.0019364	0.00304593	0.52495	0.752788
GP	Brain	caudate	Tissue_Fantom60	Brain		DEL	0.00326898	0.00618135	0.596912	0.795649
MoodSwings	Brain	caudate	Tissue_Fantom60	Brain		DEL	0.0584703	0.0270222	0.030443	0.133613
RiskTaking	Brain	caudate	Tissue_Fantom60	Brain		DEL	0.0252639	0.0312935	0.420311	0.669535
Loneliness	Brain	caudate	Tissue_Fantom60	Brain		DEL	0.0607435	0.0325064	0.0630621	0.216079
Irritability	Brain	caudate	Tissue_Fantom60	Brain		DEL	0.077499	0.0297138	0.00942716	0.0597713
Miserableness	Brain	caudate	Tissue_Fantom60	Brain		DEL	0.0276214	0.0271222	0.308544	0.56555
Hypertention	NonBrain	caudate	Tissue_Fantom60	Brain		DEL	0.0675365	0.0302443	0.0261052	0.121046
GuiltyFeelings	Brain	caudate	Tissue_Fantom60	Brain		DEL	0.0345949	0.0296519	0.244344	0.496135
MoodAnxiety	Brain	caudate	Tissue_Fantom60	Brain		DEL	0.0333503	0.0138788	0.0162628	0.088149
Albumin	NonBrain	thymus	Tissue_Fantom60	NonBrain		DEL	-0.0381094	0.00936459	4.71e-05	0.000983072
BirthWeight	NonBrain	thymus	Tissue_Fantom60	NonBrain		DEL	-0.0122014	0.0125707	0.331736	0.589081
BMD	NonBrain	thymus	Tissue_Fantom60	NonBrain		DEL	0.00677598	0.0117469	0.564053	0.778526
BMI	NonBrain	thymus	Tissue_Fantom60	NonBrain		DEL	0.0650897	0.00889877	2.59e-13	3.83e-11
Calcium	NonBrain	thymus	Tissue_Fantom60	NonBrain		DEL	-0.0161842	0.00949538	0.0883013	0.269143
Cholesterol	NonBrain	thymus	Tissue_Fantom60	NonBrain		DEL	-0.0100183	0.00900327	0.265822	0.52061
FEV1	NonBrain	thymus	Tissue_Fantom60	NonBrain		DEL	-0.0413883	0.00679905	1.15e-09	8.58e-08
FVC	NonBrain	thymus	Tissue_Fantom60	NonBrain		DEL	-0.0449674	0.00659119	8.97e-12	9.76e-10
Gamma	NonBrain	thymus	Tissue_Fantom60	NonBrain		DEL	0.0305518	0.00856583	0.000361541	0.00516208
Glucose	NonBrain	thymus	Tissue_Fantom60	NonBrain		DEL	0.0181625	0.0094902	0.0556443	0.199581
HbA1c	NonBrain	thymus	Tissue_Fantom60	NonBrain		DEL	0.0424711	0.00870171	1.06e-06	4.18e-05
HDL	NonBrain	thymus	Tissue_Fantom60	NonBrain		DEL	-0.0193604	0.00864178	0.0250704	0.118128
IGF1	NonBrain	thymus	Tissue_Fantom60	NonBrain		DEL	-0.0353126	0.00882303	6.27e-05	0.00123566
LDL	NonBrain	thymus	Tissue_Fantom60	NonBrain		DEL	-0.00820489	0.00913242	0.368954	0.623134
Neuroticism	Brain	thymus	Tissue_Fantom60	NonBrain		DEL	-0.00506925	0.0102629	0.621348	0.809106
Platelet	NonBrain	thymus	Tissue_Fantom60	NonBrain		DEL	0.0373493	0.00881321	2.26e-05	0.000536727
Reaction	Brain	thymus	Tissue_Fantom60	NonBrain		DEL	-0.000271672	0.00841624	0.974249	0.989191
Redblood	NonBrain	thymus	Tissue_Fantom60	NonBrain		DEL	-0.00382764	0.0077405	0.620957	0.809073
StandingHeight	NonBrain	thymus	Tissue_Fantom60	NonBrain		DEL	-0.0301172	0.00624293	1.41e-06	5.31e-05
TDI	Brain	thymus	Tissue_Fantom60	NonBrain		DEL	0.039148	0.00872681	7.26e-06	0.000213954
Triglycerides	NonBrain	thymus	Tissue_Fantom60	NonBrain		DEL	0.0254845	0.00887265	0.0040758	0.0321853
EA	Brain	thymus	Tissue_Fantom60	NonBrain		DEL	-0.0136599	0.00881597	0.121273	0.327931
FI	Brain	thymus	Tissue_Fantom60	NonBrain		DEL	0.0104272	0.0120907	0.388462	0.64114
HeartRate	NonBrain	thymus	Tissue_Fantom60	NonBrain		DEL	0.0339308	0.00924558	0.000242634	0.00376604
MET	NonBrain	thymus	Tissue_Fantom60	NonBrain		DEL	-0.0060586	0.0106744	0.570318	0.781414
SexPartners	NonBrain	thymus	Tissue_Fantom60	NonBrain		DEL	0.0116878	0.00953485	0.220276	0.469299
SymbolDigit	Brain	thymus	Tissue_Fantom60	NonBrain		DEL	0.00773859	0.0164214	0.637463	0.819588
TrailMaking1	Brain	thymus	Tissue_Fantom60	NonBrain		DEL	0.000941466	0.0187721	0.960001	0.982994
TrailMaking2	Brain	thymus	Tissue_Fantom60	NonBrain		DEL	-0.0250034	0.0180759	0.166592	0.398743
VSWM1	Brain	thymus	Tissue_Fantom60	NonBrain		DEL	0.0159021	0.00926076	0.0859533	0.264584
VSWM2	Brain	thymus	Tissue_Fantom60	NonBrain		DEL	0.00522578	0.00880602	0.552892	0.769295
Menarche	NonBrain	thymus	Tissue_Fantom60	NonBrain		DEL	-0.0213442	0.0132097	0.106138	0.302387
Menopause	NonBrain	thymus	Tissue_Fantom60	NonBrain		DEL	-0.0416123	0.0181287	0.0217124	0.106914
Depression	Brain	thymus	Tissue_Fantom60	NonBrain		DEL	0.000739739	0.00208168	0.722323	0.867453
GP	Brain	thymus	Tissue_Fantom60	NonBrain		DEL	-0.000339013	0.00424058	0.936281	0.972996
MoodSwings	Brain	thymus	Tissue_Fantom60	NonBrain		DEL	0.013789	0.0188062	0.462339	0.703133
RiskTaking	Brain	thymus	Tissue_Fantom60	NonBrain		DEL	0.00184613	0.0219555	0.932705	0.971727
Loneliness	Brain	thymus	Tissue_Fantom60	NonBrain		DEL	0.0312264	0.0214757	0.148268	0.371034
Irritability	Brain	thymus	Tissue_Fantom60	NonBrain		DEL	0.0196041	0.020484	0.339229	0.596429
Miserableness	Brain	thymus	Tissue_Fantom60	NonBrain		DEL	0.0350587	0.0188067	0.0613917	0.212265
Hypertention	NonBrain	thymus	Tissue_Fantom60	NonBrain		DEL	-0.0192442	0.0214434	0.36679	0.620845
GuiltyFeelings	Brain	thymus	Tissue_Fantom60	NonBrain		DEL	0.0122215	0.0205544	0.552797	0.769295
MoodAnxiety	Brain	thymus	Tissue_Fantom60	NonBrain		DEL	-0.0019536	0.00956015	0.838081	0.927634
Albumin	NonBrain	lymph_node	Tissue_Fantom60	NonBrain		DEL	-0.0264642	0.01432	0.0645948	0.218747
BirthWeight	NonBrain	lymph_node	Tissue_Fantom60	NonBrain		DEL	-0.0288751	0.0183397	0.115383	0.318244
BMD	NonBrain	lymph_node	Tissue_Fantom60	NonBrain		DEL	0.0065715	0.0179931	0.714944	0.863514
BMI	NonBrain	lymph_node	Tissue_Fantom60	NonBrain		DEL	0.0711843	0.0133555	9.83e-08	5.08e-06
Calcium	NonBrain	lymph_node	Tissue_Fantom60	NonBrain		DEL	-0.0234284	0.0145175	0.106571	0.303051
Cholesterol	NonBrain	lymph_node	Tissue_Fantom60	NonBrain		DEL	-0.00880734	0.01364	0.518476	0.747786
FEV1	NonBrain	lymph_node	Tissue_Fantom60	NonBrain		DEL	-0.0290973	0.0102492	0.00452617	0.0348809
FVC	NonBrain	lymph_node	Tissue_Fantom60	NonBrain		DEL	-0.0317656	0.00993587	0.00138845	0.0144735
Gamma	NonBrain	lymph_node	Tissue_Fantom60	NonBrain		DEL	0.0354025	0.0129611	0.00630595	0.0447374
Glucose	NonBrain	lymph_node	Tissue_Fantom60	NonBrain		DEL	-0.000921539	0.0144716	0.949226	0.978774
HbA1c	NonBrain	lymph_node	Tissue_Fantom60	NonBrain		DEL	0.0169397	0.0131126	0.196403	0.438467
HDL	NonBrain	lymph_node	Tissue_Fantom60	NonBrain		DEL	-0.0160802	0.0132139	0.223637	0.473184
IGF1	NonBrain	lymph_node	Tissue_Fantom60	NonBrain		DEL	-0.0406858	0.0133854	0.00236924	0.0213724
LDL	NonBrain	lymph_node	Tissue_Fantom60	NonBrain		DEL	-0.00971583	0.0138318	0.482415	0.720214
Neuroticism	Brain	lymph_node	Tissue_Fantom60	NonBrain		DEL	-0.0162934	0.0153035	0.287018	0.543064
Platelet	NonBrain	lymph_node	Tissue_Fantom60	NonBrain		DEL	0.0512037	0.0132162	0.000106939	0.00191044
Reaction	Brain	lymph_node	Tissue_Fantom60	NonBrain		DEL	0.0311204	0.0126651	0.0140038	0.0798471
Redblood	NonBrain	lymph_node	Tissue_Fantom60	NonBrain		DEL	0.013727	0.0116081	0.236993	0.488077
StandingHeight	NonBrain	lymph_node	Tissue_Fantom60	NonBrain		DEL	-0.0326368	0.00939991	0.000516575	0.00685922
TDI	Brain	lymph_node	Tissue_Fantom60	NonBrain		DEL	0.0552893	0.0131439	2.59e-05	0.000596832
Triglycerides	NonBrain	lymph_node	Tissue_Fantom60	NonBrain		DEL	0.0249557	0.0134442	0.0634201	0.216704
EA	Brain	lymph_node	Tissue_Fantom60	NonBrain		DEL	-0.0280908	0.01326	0.0341362	0.144434
FI	Brain	lymph_node	Tissue_Fantom60	NonBrain		DEL	-0.00188171	0.0172684	0.913227	0.962415
HeartRate	NonBrain	lymph_node	Tissue_Fantom60	NonBrain		DEL	-0.0142869	0.0138869	0.303574	0.560317
MET	NonBrain	lymph_node	Tissue_Fantom60	NonBrain		DEL	0.0087425	0.0159862	0.584462	0.789151
SexPartners	NonBrain	lymph_node	Tissue_Fantom60	NonBrain		DEL	-0.0209664	0.0142683	0.141716	0.359811
SymbolDigit	Brain	lymph_node	Tissue_Fantom60	NonBrain		DEL	0.0189756	0.0228921	0.407154	0.658571
TrailMaking1	Brain	lymph_node	Tissue_Fantom60	NonBrain		DEL	0.0537701	0.0260098	0.0387077	0.157145
TrailMaking2	Brain	lymph_node	Tissue_Fantom60	NonBrain		DEL	0.0197509	0.0250758	0.430904	0.678165
VSWM1	Brain	lymph_node	Tissue_Fantom60	NonBrain		DEL	0.00609261	0.0138888	0.6609	0.832925
VSWM2	Brain	lymph_node	Tissue_Fantom60	NonBrain		DEL	-0.00158758	0.0131838	0.904152	0.958575
Menarche	NonBrain	lymph_node	Tissue_Fantom60	NonBrain		DEL	-0.0712161	0.0190417	0.000184065	0.00297562
Menopause	NonBrain	lymph_node	Tissue_Fantom60	NonBrain		DEL	-0.0282802	0.0259992	0.276715	0.531782
Depression	Brain	lymph_node	Tissue_Fantom60	NonBrain		DEL	-0.00409327	0.00313469	0.191622	0.431558
GP	Brain	lymph_node	Tissue_Fantom60	NonBrain		DEL	-0.00555798	0.00636676	0.38268	0.634961
MoodSwings	Brain	lymph_node	Tissue_Fantom60	NonBrain		DEL	-0.0195446	0.0280213	0.485164	0.72204
RiskTaking	Brain	lymph_node	Tissue_Fantom60	NonBrain		DEL	-0.0126294	0.0331879	0.70295	0.856581
Loneliness	Brain	lymph_node	Tissue_Fantom60	NonBrain		DEL	-0.0226764	0.033647	0.498789	0.732607
Irritability	Brain	lymph_node	Tissue_Fantom60	NonBrain		DEL	-0.00569911	0.0314289	0.855905	0.936451
Miserableness	Brain	lymph_node	Tissue_Fantom60	NonBrain		DEL	-0.00374543	0.0280863	0.893839	0.954496
Hypertention	NonBrain	lymph_node	Tissue_Fantom60	NonBrain		DEL	0.0427485	0.031064	0.170233	0.403281
GuiltyFeelings	Brain	lymph_node	Tissue_Fantom60	NonBrain		DEL	-0.0157437	0.0310862	0.611735	0.803154
MoodAnxiety	Brain	lymph_node	Tissue_Fantom60	NonBrain		DEL	-0.0170165	0.0144546	0.239102	0.490132
Albumin	NonBrain	locus_coeruleus	Tissue_Fantom60	Brain		DEL	-0.039683	0.0114658	0.000538252	0.00706462
BirthWeight	NonBrain	locus_coeruleus	Tissue_Fantom60	Brain		DEL	-0.0329269	0.0149354	0.0274819	0.125158
BMD	NonBrain	locus_coeruleus	Tissue_Fantom60	Brain		DEL	0.0373515	0.0136237	0.00611359	0.0438141
BMI	NonBrain	locus_coeruleus	Tissue_Fantom60	Brain		DEL	0.0483605	0.0108384	8.12e-06	0.000235142
Calcium	NonBrain	locus_coeruleus	Tissue_Fantom60	Brain		DEL	-0.00973322	0.0116249	0.402438	0.654448
Cholesterol	NonBrain	locus_coeruleus	Tissue_Fantom60	Brain		DEL	-0.0231377	0.0110273	0.0358858	0.149066
FEV1	NonBrain	locus_coeruleus	Tissue_Fantom60	Brain		DEL	-0.048964	0.0083734	4.99e-09	3.34e-07
FVC	NonBrain	locus_coeruleus	Tissue_Fantom60	Brain		DEL	-0.0506559	0.00811774	4.38e-10	3.56e-08
Gamma	NonBrain	locus_coeruleus	Tissue_Fantom60	Brain		DEL	0.0165526	0.0104613	0.113587	0.315641
Glucose	NonBrain	locus_coeruleus	Tissue_Fantom60	Brain		DEL	0.0172926	0.0115702	0.135023	0.349232
HbA1c	NonBrain	locus_coeruleus	Tissue_Fantom60	Brain		DEL	0.0146361	0.010654	0.169513	0.402285
HDL	NonBrain	locus_coeruleus	Tissue_Fantom60	Brain		DEL	-0.0453933	0.010579	1.78e-05	0.000443269
IGF1	NonBrain	locus_coeruleus	Tissue_Fantom60	Brain		DEL	-0.0176788	0.0108115	0.102011	0.29489
LDL	NonBrain	locus_coeruleus	Tissue_Fantom60	Brain		DEL	-0.0131889	0.0111819	0.238207	0.489384
Neuroticism	Brain	locus_coeruleus	Tissue_Fantom60	Brain		DEL	0.0504865	0.0120171	2.66e-05	0.000608948
Platelet	NonBrain	locus_coeruleus	Tissue_Fantom60	Brain		DEL	0.0409996	0.010676	0.000122869	0.00214184
Reaction	Brain	locus_coeruleus	Tissue_Fantom60	Brain		DEL	0.0573749	0.0102586	2.23e-08	1.32e-06
Redblood	NonBrain	locus_coeruleus	Tissue_Fantom60	Brain		DEL	0.00115555	0.00937604	0.901913	0.957368
StandingHeight	NonBrain	locus_coeruleus	Tissue_Fantom60	Brain		DEL	-0.0396026	0.00764368	2.21e-07	1.04e-05
TDI	Brain	locus_coeruleus	Tissue_Fantom60	Brain		DEL	0.0704778	0.0106733	4.03e-11	3.92e-09
Triglycerides	NonBrain	locus_coeruleus	Tissue_Fantom60	Brain		DEL	0.0197845	0.010873	0.0688199	0.228571
EA	Brain	locus_coeruleus	Tissue_Fantom60	Brain		DEL	-0.0887332	0.0107424	1.46e-16	3.43e-14
FI	Brain	locus_coeruleus	Tissue_Fantom60	Brain		DEL	-0.0656259	0.0145052	6.06e-06	0.000182619
HeartRate	NonBrain	locus_coeruleus	Tissue_Fantom60	Brain		DEL	0.00394908	0.0112179	0.724812	0.869187
MET	NonBrain	locus_coeruleus	Tissue_Fantom60	Brain		DEL	-0.00205779	0.0129669	0.873909	0.945222
SexPartners	NonBrain	locus_coeruleus	Tissue_Fantom60	Brain		DEL	-0.0209434	0.0114409	0.0671641	0.224721
SymbolDigit	Brain	locus_coeruleus	Tissue_Fantom60	Brain		DEL	-0.0572676	0.0182908	0.00174273	0.0170399
TrailMaking1	Brain	locus_coeruleus	Tissue_Fantom60	Brain		DEL	0.011113	0.0209066	0.595036	0.794827
TrailMaking2	Brain	locus_coeruleus	Tissue_Fantom60	Brain		DEL	0.0579799	0.0202843	0.00425904	0.0333685
VSWM1	Brain	locus_coeruleus	Tissue_Fantom60	Brain		DEL	0.00494946	0.0111743	0.657815	0.831714
VSWM2	Brain	locus_coeruleus	Tissue_Fantom60	Brain		DEL	0.0212056	0.0106655	0.0467859	0.177178
Menarche	NonBrain	locus_coeruleus	Tissue_Fantom60	Brain		DEL	0.00256527	0.0153333	0.867134	0.941904
Menopause	NonBrain	locus_coeruleus	Tissue_Fantom60	Brain		DEL	-0.0455546	0.0203924	0.0254908	0.119624
Depression	Brain	locus_coeruleus	Tissue_Fantom60	Brain		DEL	0.000671974	0.00254595	0.791828	0.903835
GP	Brain	locus_coeruleus	Tissue_Fantom60	Brain		DEL	-0.00336106	0.00516242	0.515006	0.745316
MoodSwings	Brain	locus_coeruleus	Tissue_Fantom60	Brain		DEL	0.0851668	0.0226775	0.000164133	0.00274024
RiskTaking	Brain	locus_coeruleus	Tissue_Fantom60	Brain		DEL	-0.0356212	0.0272481	0.188635	0.427238
Loneliness	Brain	locus_coeruleus	Tissue_Fantom60	Brain		DEL	0.13508	0.0256857	2.1e-07	9.99e-06
Irritability	Brain	locus_coeruleus	Tissue_Fantom60	Brain		DEL	0.00702448	0.0252625	0.781013	0.898347
Miserableness	Brain	locus_coeruleus	Tissue_Fantom60	Brain		DEL	0.0999812	0.0226935	9.91e-06	0.000273397
Hypertention	NonBrain	locus_coeruleus	Tissue_Fantom60	Brain		DEL	0.0504187	0.0251274	0.0457843	0.174277
GuiltyFeelings	Brain	locus_coeruleus	Tissue_Fantom60	Brain		DEL	0.0331873	0.024684	0.180072	0.414825
MoodAnxiety	Brain	locus_coeruleus	Tissue_Fantom60	Brain		DEL	0.0681738	0.0115492	3.58e-09	2.45e-07
Albumin	NonBrain	occipital_pole	Tissue_Fantom60	Brain		DEL	-0.0441957	0.0122349	0.000303568	0.00451299
BirthWeight	NonBrain	occipital_pole	Tissue_Fantom60	Brain		DEL	-0.0222895	0.0163556	0.172945	0.40671
BMD	NonBrain	occipital_pole	Tissue_Fantom60	Brain		DEL	0.00309109	0.0162682	0.849302	0.933349
BMI	NonBrain	occipital_pole	Tissue_Fantom60	Brain		DEL	0.115005	0.0115681	2.76e-23	1.95e-20
Calcium	NonBrain	occipital_pole	Tissue_Fantom60	Brain		DEL	-0.0377809	0.0124036	0.00231941	0.021113
Cholesterol	NonBrain	occipital_pole	Tissue_Fantom60	Brain		DEL	-0.0316458	0.0116651	0.00667071	0.0463472
FEV1	NonBrain	occipital_pole	Tissue_Fantom60	Brain		DEL	-0.0952579	0.0088747	7.13e-27	1.16e-23
FVC	NonBrain	occipital_pole	Tissue_Fantom60	Brain		DEL	-0.0983195	0.008603	3.05e-30	1.5e-26
Gamma	NonBrain	occipital_pole	Tissue_Fantom60	Brain		DEL	0.0691795	0.0111186	4.91e-10	3.95e-08
Glucose	NonBrain	occipital_pole	Tissue_Fantom60	Brain		DEL	0.0184693	0.0124799	0.138894	0.355925
HbA1c	NonBrain	occipital_pole	Tissue_Fantom60	Brain		DEL	0.0728528	0.0113678	1.47e-10	1.29e-08
HDL	NonBrain	occipital_pole	Tissue_Fantom60	Brain		DEL	-0.0452427	0.0112885	6.13e-05	0.00122012
IGF1	NonBrain	occipital_pole	Tissue_Fantom60	Brain		DEL	-0.0728755	0.0114283	1.81e-10	1.55e-08
LDL	NonBrain	occipital_pole	Tissue_Fantom60	Brain		DEL	-0.0264132	0.0118355	0.0256361	0.11991
Neuroticism	Brain	occipital_pole	Tissue_Fantom60	Brain		DEL	0.0076876	0.0139237	0.580865	0.787765
Platelet	NonBrain	occipital_pole	Tissue_Fantom60	Brain		DEL	0.0449734	0.0114731	8.86e-05	0.00165052
Reaction	Brain	occipital_pole	Tissue_Fantom60	Brain		DEL	0.0539236	0.0110071	9.64e-07	3.86e-05
Redblood	NonBrain	occipital_pole	Tissue_Fantom60	Brain		DEL	0.0219826	0.0100775	0.0291578	0.129715
StandingHeight	NonBrain	occipital_pole	Tissue_Fantom60	Brain		DEL	-0.068921	0.00807471	1.4e-17	4.03e-15
TDI	Brain	occipital_pole	Tissue_Fantom60	Brain		DEL	0.0761883	0.0112928	1.52e-11	1.59e-09
Triglycerides	NonBrain	occipital_pole	Tissue_Fantom60	Brain		DEL	0.041295	0.011512	0.000334383	0.00486831
EA	Brain	occipital_pole	Tissue_Fantom60	Brain		DEL	-0.0470312	0.0114389	3.93e-05	0.000850222
FI	Brain	occipital_pole	Tissue_Fantom60	Brain		DEL	-0.0286556	0.0163422	0.0795226	0.251238
HeartRate	NonBrain	occipital_pole	Tissue_Fantom60	Brain		DEL	0.0468123	0.0121237	0.000112834	0.00199886
MET	NonBrain	occipital_pole	Tissue_Fantom60	Brain		DEL	-0.00475269	0.0147067	0.746571	0.882088
SexPartners	NonBrain	occipital_pole	Tissue_Fantom60	Brain		DEL	-0.0215384	0.0130725	0.0994314	0.289988
SymbolDigit	Brain	occipital_pole	Tissue_Fantom60	Brain		DEL	-0.0130605	0.0227637	0.566143	0.779085
TrailMaking1	Brain	occipital_pole	Tissue_Fantom60	Brain		DEL	0.0304715	0.0262517	0.245747	0.497889
TrailMaking2	Brain	occipital_pole	Tissue_Fantom60	Brain		DEL	0.0462496	0.0251998	0.0664615	0.22329
VSWM1	Brain	occipital_pole	Tissue_Fantom60	Brain		DEL	0.038372	0.0121133	0.00153629	0.0155543
VSWM2	Brain	occipital_pole	Tissue_Fantom60	Brain		DEL	0.0238818	0.0115745	0.0390837	0.158174
Menarche	NonBrain	occipital_pole	Tissue_Fantom60	Brain		DEL	-0.067027	0.0172876	0.000105703	0.00189294
Menopause	NonBrain	occipital_pole	Tissue_Fantom60	Brain		DEL	-0.0247916	0.0263216	0.346259	0.603212
Depression	Brain	occipital_pole	Tissue_Fantom60	Brain		DEL	0.00149797	0.0026926	0.577987	0.786176
GP	Brain	occipital_pole	Tissue_Fantom60	Brain		DEL	-0.00423441	0.0055241	0.44336	0.688595
MoodSwings	Brain	occipital_pole	Tissue_Fantom60	Brain		DEL	0.0340793	0.0249706	0.170209	0.403281
RiskTaking	Brain	occipital_pole	Tissue_Fantom60	Brain		DEL	-0.0173456	0.0298081	0.558109	0.773343
Loneliness	Brain	occipital_pole	Tissue_Fantom60	Brain		DEL	0.0684924	0.0264786	0.0104578	0.0643743
Irritability	Brain	occipital_pole	Tissue_Fantom60	Brain		DEL	0.0204457	0.0268296	0.447088	0.691843
Miserableness	Brain	occipital_pole	Tissue_Fantom60	Brain		DEL	0.0227321	0.0245782	0.353858	0.609641
Hypertention	NonBrain	occipital_pole	Tissue_Fantom60	Brain		DEL	0.0321723	0.026739	0.231571	0.481774
GuiltyFeelings	Brain	occipital_pole	Tissue_Fantom60	Brain		DEL	0.0271143	0.026653	0.31095	0.568058
MoodAnxiety	Brain	occipital_pole	Tissue_Fantom60	Brain		DEL	0.0135496	0.0125348	0.279717	0.534778
Albumin	NonBrain	frontal_lobe	Tissue_Fantom60	Brain		DEL	-0.0201591	0.0130224	0.121614	0.32857
BirthWeight	NonBrain	frontal_lobe	Tissue_Fantom60	Brain		DEL	-0.0418043	0.0170943	0.0144654	0.0815039
BMD	NonBrain	frontal_lobe	Tissue_Fantom60	Brain		DEL	0.0356071	0.0164202	0.0301218	0.132805
BMI	NonBrain	frontal_lobe	Tissue_Fantom60	Brain		DEL	0.0838658	0.0122927	8.97e-12	9.76e-10
Calcium	NonBrain	frontal_lobe	Tissue_Fantom60	Brain		DEL	-0.00365363	0.0132032	0.781993	0.898896
Cholesterol	NonBrain	frontal_lobe	Tissue_Fantom60	Brain		DEL	-0.0332722	0.0124545	0.00755184	0.0506607
FEV1	NonBrain	frontal_lobe	Tissue_Fantom60	Brain		DEL	-0.0681517	0.00942812	4.89e-13	7.09e-11
FVC	NonBrain	frontal_lobe	Tissue_Fantom60	Brain		DEL	-0.0806015	0.00913942	1.16e-18	3.81e-16
Gamma	NonBrain	frontal_lobe	Tissue_Fantom60	Brain		DEL	0.0345112	0.0118415	0.00356365	0.0291235
Glucose	NonBrain	frontal_lobe	Tissue_Fantom60	Brain		DEL	0.0287473	0.0131784	0.0291549	0.129715
HbA1c	NonBrain	frontal_lobe	Tissue_Fantom60	Brain		DEL	0.0563554	0.0120665	3.01e-06	0.000101558
HDL	NonBrain	frontal_lobe	Tissue_Fantom60	Brain		DEL	-0.0594943	0.0120158	7.37e-07	3.13e-05
IGF1	NonBrain	frontal_lobe	Tissue_Fantom60	Brain		DEL	-0.0291739	0.0122131	0.016907	0.090448
LDL	NonBrain	frontal_lobe	Tissue_Fantom60	Brain		DEL	-0.022631	0.012632	0.0732026	0.237824
Neuroticism	Brain	frontal_lobe	Tissue_Fantom60	Brain		DEL	0.0470928	0.0141569	0.00087954	0.0102847
Platelet	NonBrain	frontal_lobe	Tissue_Fantom60	Brain		DEL	0.0405238	0.0121728	0.000871531	0.0102072
Reaction	Brain	frontal_lobe	Tissue_Fantom60	Brain		DEL	0.0860619	0.0116459	1.47e-13	2.2e-11
Redblood	NonBrain	frontal_lobe	Tissue_Fantom60	Brain		DEL	0.0303903	0.0106916	0.00447695	0.0346174
StandingHeight	NonBrain	frontal_lobe	Tissue_Fantom60	Brain		DEL	-0.0915611	0.0086302	2.72e-26	2.72e-23
TDI	Brain	frontal_lobe	Tissue_Fantom60	Brain		DEL	0.0727672	0.012067	1.64e-09	1.19e-07
Triglycerides	NonBrain	frontal_lobe	Tissue_Fantom60	Brain		DEL	0.0278413	0.0122819	0.0233999	0.11273
EA	Brain	frontal_lobe	Tissue_Fantom60	Brain		DEL	-0.0797353	0.0121707	5.7e-11	5.34e-09
FI	Brain	frontal_lobe	Tissue_Fantom60	Brain		DEL	-0.085877	0.0163536	1.51e-07	7.45e-06
HeartRate	NonBrain	frontal_lobe	Tissue_Fantom60	Brain		DEL	0.0354043	0.0128193	0.00574855	0.0419706
MET	NonBrain	frontal_lobe	Tissue_Fantom60	Brain		DEL	0.0193574	0.0149158	0.194364	0.435941
SexPartners	NonBrain	frontal_lobe	Tissue_Fantom60	Brain		DEL	-0.0463003	0.0133678	0.000533116	0.00700965
SymbolDigit	Brain	frontal_lobe	Tissue_Fantom60	Brain		DEL	-0.0541636	0.021397	0.0113629	0.0685763
TrailMaking1	Brain	frontal_lobe	Tissue_Fantom60	Brain		DEL	0.013474	0.0246244	0.584254	0.789146
TrailMaking2	Brain	frontal_lobe	Tissue_Fantom60	Brain		DEL	0.0647409	0.0239167	0.00679174	0.0469894
VSWM1	Brain	frontal_lobe	Tissue_Fantom60	Brain		DEL	0.0334993	0.0127404	0.00855459	0.0555729
VSWM2	Brain	frontal_lobe	Tissue_Fantom60	Brain		DEL	0.0528755	0.0121556	1.36e-05	0.000356058
Menarche	NonBrain	frontal_lobe	Tissue_Fantom60	Brain		DEL	-0.0480056	0.0179757	0.00757237	0.0507524
Menopause	NonBrain	frontal_lobe	Tissue_Fantom60	Brain		DEL	-0.0395144	0.0245821	0.107959	0.305634
Depression	Brain	frontal_lobe	Tissue_Fantom60	Brain		DEL	0.00167931	0.00287627	0.559321	0.774308
GP	Brain	frontal_lobe	Tissue_Fantom60	Brain		DEL	-0.00247841	0.00586601	0.672658	0.840014
MoodSwings	Brain	frontal_lobe	Tissue_Fantom60	Brain		DEL	0.0851796	0.0261005	0.00105901	0.0117959
RiskTaking	Brain	frontal_lobe	Tissue_Fantom60	Brain		DEL	-0.117885	0.0317968	0.00016583	0.00276234
Loneliness	Brain	frontal_lobe	Tissue_Fantom60	Brain		DEL	0.113235	0.0293236	0.000130444	0.00225411
Irritability	Brain	frontal_lobe	Tissue_Fantom60	Brain		DEL	0.019042	0.0285726	0.505603	0.738218
Miserableness	Brain	frontal_lobe	Tissue_Fantom60	Brain		DEL	0.0933187	0.0259915	0.000320431	0.00469615
Hypertention	NonBrain	frontal_lobe	Tissue_Fantom60	Brain		DEL	0.0199851	0.0288683	0.489389	0.72567
GuiltyFeelings	Brain	frontal_lobe	Tissue_Fantom60	Brain		DEL	0.05373	0.028115	0.0569807	0.202659
MoodAnxiety	Brain	frontal_lobe	Tissue_Fantom60	Brain		DEL	0.0545232	0.0132925	4.1e-05	0.000873966
Albumin	NonBrain	corpus_callosum	Tissue_Fantom60	Brain		DEL	-0.0173798	0.0143306	0.225217	0.475234
BirthWeight	NonBrain	corpus_callosum	Tissue_Fantom60	Brain		DEL	-0.085537	0.0187137	4.86e-06	0.000151042
BMD	NonBrain	corpus_callosum	Tissue_Fantom60	Brain		DEL	0.022068	0.0173297	0.20287	0.447942
BMI	NonBrain	corpus_callosum	Tissue_Fantom60	Brain		DEL	-0.000201644	0.0135386	0.988117	0.995316
Calcium	NonBrain	corpus_callosum	Tissue_Fantom60	Brain		DEL	-0.0165208	0.0145303	0.255545	0.508888
Cholesterol	NonBrain	corpus_callosum	Tissue_Fantom60	Brain		DEL	-0.00673532	0.0137524	0.624308	0.810642
FEV1	NonBrain	corpus_callosum	Tissue_Fantom60	Brain		DEL	-0.0428915	0.0104476	4.04e-05	0.000865433
FVC	NonBrain	corpus_callosum	Tissue_Fantom60	Brain		DEL	-0.0432732	0.0101292	1.94e-05	0.000473475
Gamma	NonBrain	corpus_callosum	Tissue_Fantom60	Brain		DEL	-0.000527342	0.0130479	0.967762	0.986638
Glucose	NonBrain	corpus_callosum	Tissue_Fantom60	Brain		DEL	-0.00652002	0.0144262	0.6513	0.828279
HbA1c	NonBrain	corpus_callosum	Tissue_Fantom60	Brain		DEL	-0.0100766	0.0132936	0.448448	0.692953
HDL	NonBrain	corpus_callosum	Tissue_Fantom60	Brain		DEL	-0.0632804	0.0132218	1.7e-06	6.18e-05
IGF1	NonBrain	corpus_callosum	Tissue_Fantom60	Brain		DEL	0.00451633	0.0134857	0.737703	0.877672
LDL	NonBrain	corpus_callosum	Tissue_Fantom60	Brain		DEL	0.0100885	0.0139463	0.469443	0.709585
Neuroticism	Brain	corpus_callosum	Tissue_Fantom60	Brain		DEL	0.0892044	0.0152162	4.56e-09	3.08e-07
Platelet	NonBrain	corpus_callosum	Tissue_Fantom60	Brain		DEL	0.0193251	0.0133737	0.148456	0.371379
Reaction	Brain	corpus_callosum	Tissue_Fantom60	Brain		DEL	0.0493558	0.0128393	0.000120995	0.00211556
Redblood	NonBrain	corpus_callosum	Tissue_Fantom60	Brain		DEL	0.0122769	0.0117432	0.295818	0.552933
StandingHeight	NonBrain	corpus_callosum	Tissue_Fantom60	Brain		DEL	-0.0470342	0.00955165	8.47e-07	3.48e-05
TDI	Brain	corpus_callosum	Tissue_Fantom60	Brain		DEL	0.0548751	0.013346	3.93e-05	0.000850222
Triglycerides	NonBrain	corpus_callosum	Tissue_Fantom60	Brain		DEL	0.0183926	0.0135555	0.174834	0.408845
EA	Brain	corpus_callosum	Tissue_Fantom60	Brain		DEL	-0.0830793	0.0134685	6.9e-10	5.29e-08
FI	Brain	corpus_callosum	Tissue_Fantom60	Brain		DEL	-0.148887	0.0175597	2.28e-17	6.37e-15
HeartRate	NonBrain	corpus_callosum	Tissue_Fantom60	Brain		DEL	0.0353748	0.0140838	0.012014	0.0712838
MET	NonBrain	corpus_callosum	Tissue_Fantom60	Brain		DEL	0.00949808	0.0159013	0.550298	0.768216
SexPartners	NonBrain	corpus_callosum	Tissue_Fantom60	Brain		DEL	-0.0253494	0.0142439	0.0751304	0.241698
SymbolDigit	Brain	corpus_callosum	Tissue_Fantom60	Brain		DEL	-0.087265	0.0222397	8.72e-05	0.00163257
TrailMaking1	Brain	corpus_callosum	Tissue_Fantom60	Brain		DEL	0.0317173	0.0254161	0.212062	0.4603
TrailMaking2	Brain	corpus_callosum	Tissue_Fantom60	Brain		DEL	0.0804964	0.0248898	0.00122051	0.0131491
VSWM1	Brain	corpus_callosum	Tissue_Fantom60	Brain		DEL	0.0221614	0.0140327	0.114276	0.316727
VSWM2	Brain	corpus_callosum	Tissue_Fantom60	Brain		DEL	0.0316877	0.0133115	0.0172912	0.0916744
Menarche	NonBrain	corpus_callosum	Tissue_Fantom60	Brain		DEL	0.0056775	0.0194182	0.769997	0.892827
Menopause	NonBrain	corpus_callosum	Tissue_Fantom60	Brain		DEL	-0.0267749	0.0255438	0.294551	0.551379
Depression	Brain	corpus_callosum	Tissue_Fantom60	Brain		DEL	0.0036896	0.00318227	0.246284	0.498498
GP	Brain	corpus_callosum	Tissue_Fantom60	Brain		DEL	0.00665886	0.00647192	0.303535	0.560317
MoodSwings	Brain	corpus_callosum	Tissue_Fantom60	Brain		DEL	0.132488	0.0283286	2.81e-06	9.56e-05
RiskTaking	Brain	corpus_callosum	Tissue_Fantom60	Brain		DEL	-0.0830011	0.0337625	0.0133141	0.0769304
Loneliness	Brain	corpus_callosum	Tissue_Fantom60	Brain		DEL	0.148362	0.0330968	9.1e-06	0.000255193
Irritability	Brain	corpus_callosum	Tissue_Fantom60	Brain		DEL	0.00118408	0.0314843	0.969852	0.987446
Miserableness	Brain	corpus_callosum	Tissue_Fantom60	Brain		DEL	0.137606	0.0282788	1.12e-06	4.39e-05
Hypertention	NonBrain	corpus_callosum	Tissue_Fantom60	Brain		DEL	0.0394582	0.0317688	0.21515	0.464057
GuiltyFeelings	Brain	corpus_callosum	Tissue_Fantom60	Brain		DEL	0.0976718	0.0307709	0.00158387	0.0158946
MoodAnxiety	Brain	corpus_callosum	Tissue_Fantom60	Brain		DEL	0.109983	0.0145141	3.53e-14	5.67e-12
Albumin	NonBrain	epididymis	Tissue_Fantom60	NonBrain		DEL	-0.00841944	0.0112595	0.454603	0.69814
BirthWeight	NonBrain	epididymis	Tissue_Fantom60	NonBrain		DEL	-0.0110301	0.0144038	0.44381	0.689107
BMD	NonBrain	epididymis	Tissue_Fantom60	NonBrain		DEL	0.0160296	0.0137821	0.244799	0.496621
BMI	NonBrain	epididymis	Tissue_Fantom60	NonBrain		DEL	0.00187455	0.010642	0.860178	0.938532
Calcium	NonBrain	epididymis	Tissue_Fantom60	NonBrain		DEL	-0.00894777	0.0114149	0.43312	0.679829
Cholesterol	NonBrain	epididymis	Tissue_Fantom60	NonBrain		DEL	-0.0281193	0.0107606	0.0089711	0.0576959
FEV1	NonBrain	epididymis	Tissue_Fantom60	NonBrain		DEL	-0.0280123	0.0081936	0.00062903	0.00793909
FVC	NonBrain	epididymis	Tissue_Fantom60	NonBrain		DEL	-0.0256194	0.00794377	0.0012594	0.0134993
Gamma	NonBrain	epididymis	Tissue_Fantom60	NonBrain		DEL	-0.0105858	0.0102227	0.300428	0.557029
Glucose	NonBrain	epididymis	Tissue_Fantom60	NonBrain		DEL	-0.0181419	0.0113225	0.109092	0.30716
HbA1c	NonBrain	epididymis	Tissue_Fantom60	NonBrain		DEL	0.00654031	0.0103888	0.528987	0.75567
HDL	NonBrain	epididymis	Tissue_Fantom60	NonBrain		DEL	-0.021084	0.010388	0.0423923	0.165759
IGF1	NonBrain	epididymis	Tissue_Fantom60	NonBrain		DEL	-0.00779152	0.010558	0.460533	0.701856
LDL	NonBrain	epididymis	Tissue_Fantom60	NonBrain		DEL	-0.0263693	0.0109169	0.0157162	0.0860198
Neuroticism	Brain	epididymis	Tissue_Fantom60	NonBrain		DEL	0.0205274	0.0118329	0.0827811	0.25775
Platelet	NonBrain	epididymis	Tissue_Fantom60	NonBrain		DEL	-0.030963	0.0105266	0.00326746	0.0272755
Reaction	Brain	epididymis	Tissue_Fantom60	NonBrain		DEL	0.00420717	0.0100379	0.675123	0.841272
Redblood	NonBrain	epididymis	Tissue_Fantom60	NonBrain		DEL	-0.0205321	0.0092453	0.0263639	0.121791
StandingHeight	NonBrain	epididymis	Tissue_Fantom60	NonBrain		DEL	-0.012652	0.00750268	0.0917322	0.275513
TDI	Brain	epididymis	Tissue_Fantom60	NonBrain		DEL	0.0126508	0.0104815	0.227448	0.478328
Triglycerides	NonBrain	epididymis	Tissue_Fantom60	NonBrain		DEL	-0.000211527	0.0106165	0.984104	0.993362
EA	Brain	epididymis	Tissue_Fantom60	NonBrain		DEL	-0.0276237	0.0105552	0.008869	0.0573384
FI	Brain	epididymis	Tissue_Fantom60	NonBrain		DEL	0.00690566	0.0134886	0.608677	0.801408
HeartRate	NonBrain	epididymis	Tissue_Fantom60	NonBrain		DEL	-0.00520538	0.0110734	0.638298	0.82027
MET	NonBrain	epididymis	Tissue_Fantom60	NonBrain		DEL	-0.00553552	0.0123509	0.654019	0.829339
SexPartners	NonBrain	epididymis	Tissue_Fantom60	NonBrain		DEL	0.00481364	0.0110345	0.662666	0.834097
SymbolDigit	Brain	epididymis	Tissue_Fantom60	NonBrain		DEL	-0.0394153	0.0171362	0.0214429	0.106046
TrailMaking1	Brain	epididymis	Tissue_Fantom60	NonBrain		DEL	0.015614	0.01973	0.428722	0.67666
TrailMaking2	Brain	epididymis	Tissue_Fantom60	NonBrain		DEL	-0.00154898	0.0192573	0.935891	0.972996
VSWM1	Brain	epididymis	Tissue_Fantom60	NonBrain		DEL	0.0212647	0.0110023	0.0532669	0.193645
VSWM2	Brain	epididymis	Tissue_Fantom60	NonBrain		DEL	0.00675333	0.0104062	0.516358	0.74604
Menarche	NonBrain	epididymis	Tissue_Fantom60	NonBrain		DEL	0.0176582	0.0148903	0.23567	0.486448
Menopause	NonBrain	epididymis	Tissue_Fantom60	NonBrain		DEL	0.0230426	0.0193851	0.234571	0.484944
Depression	Brain	epididymis	Tissue_Fantom60	NonBrain		DEL	0.0031762	0.00250046	0.203997	0.449706
GP	Brain	epididymis	Tissue_Fantom60	NonBrain		DEL	0.00088501	0.00507782	0.861638	0.939507
MoodSwings	Brain	epididymis	Tissue_Fantom60	NonBrain		DEL	0.0126571	0.0221788	0.56816	0.779974
RiskTaking	Brain	epididymis	Tissue_Fantom60	NonBrain		DEL	0.00560119	0.0257219	0.827687	0.922479
Loneliness	Brain	epididymis	Tissue_Fantom60	NonBrain		DEL	0.0207679	0.0272646	0.447314	0.691903
Irritability	Brain	epididymis	Tissue_Fantom60	NonBrain		DEL	0.0518514	0.0244509	0.0347397	0.145861
Miserableness	Brain	epididymis	Tissue_Fantom60	NonBrain		DEL	-0.00723583	0.0223285	0.745776	0.882088
Hypertention	NonBrain	epididymis	Tissue_Fantom60	NonBrain		DEL	0.0605235	0.024754	0.0149281	0.0832327
GuiltyFeelings	Brain	epididymis	Tissue_Fantom60	NonBrain		DEL	-0.0218946	0.024645	0.373204	0.627109
MoodAnxiety	Brain	epididymis	Tissue_Fantom60	NonBrain		DEL	0.017358	0.0114648	0.130021	0.341309
Albumin	NonBrain	seminal_vesicle	Tissue_Fantom60	NonBrain		DEL	-0.00487174	0.0152469	0.749329	0.883197
BirthWeight	NonBrain	seminal_vesicle	Tissue_Fantom60	NonBrain		DEL	0.00488168	0.0192128	0.79943	0.908202
BMD	NonBrain	seminal_vesicle	Tissue_Fantom60	NonBrain		DEL	-0.00449384	0.0185522	0.808605	0.913199
BMI	NonBrain	seminal_vesicle	Tissue_Fantom60	NonBrain		DEL	0.0221226	0.0143576	0.12336	0.33171
Calcium	NonBrain	seminal_vesicle	Tissue_Fantom60	NonBrain		DEL	-0.0124554	0.0154633	0.420542	0.669535
Cholesterol	NonBrain	seminal_vesicle	Tissue_Fantom60	NonBrain		DEL	-0.00576013	0.0145922	0.693034	0.850949
FEV1	NonBrain	seminal_vesicle	Tissue_Fantom60	NonBrain		DEL	-0.0360437	0.0111872	0.00127366	0.0135899
FVC	NonBrain	seminal_vesicle	Tissue_Fantom60	NonBrain		DEL	-0.0316173	0.0108461	0.00355619	0.0291107
Gamma	NonBrain	seminal_vesicle	Tissue_Fantom60	NonBrain		DEL	-0.0231621	0.0138616	0.0947302	0.281488
Glucose	NonBrain	seminal_vesicle	Tissue_Fantom60	NonBrain		DEL	0.0238844	0.0153209	0.11901	0.324915
HbA1c	NonBrain	seminal_vesicle	Tissue_Fantom60	NonBrain		DEL	-0.00884522	0.0140118	0.527865	0.754778
HDL	NonBrain	seminal_vesicle	Tissue_Fantom60	NonBrain		DEL	-0.0126524	0.0140676	0.368441	0.622713
IGF1	NonBrain	seminal_vesicle	Tissue_Fantom60	NonBrain		DEL	-0.0215636	0.0143201	0.132114	0.34448
LDL	NonBrain	seminal_vesicle	Tissue_Fantom60	NonBrain		DEL	-0.00774485	0.0148037	0.600857	0.797262
Neuroticism	Brain	seminal_vesicle	Tissue_Fantom60	NonBrain		DEL	0.00426329	0.0159512	0.78926	0.902849
Platelet	NonBrain	seminal_vesicle	Tissue_Fantom60	NonBrain		DEL	-0.0300403	0.0141904	0.0342657	0.144697
Reaction	Brain	seminal_vesicle	Tissue_Fantom60	NonBrain		DEL	-0.00229877	0.0135419	0.865205	0.940968
Redblood	NonBrain	seminal_vesicle	Tissue_Fantom60	NonBrain		DEL	-0.00832178	0.0124629	0.504312	0.73685
StandingHeight	NonBrain	seminal_vesicle	Tissue_Fantom60	NonBrain		DEL	-0.0361248	0.01012	0.000357475	0.0051261
TDI	Brain	seminal_vesicle	Tissue_Fantom60	NonBrain		DEL	0.0115821	0.0141417	0.412785	0.663831
Triglycerides	NonBrain	seminal_vesicle	Tissue_Fantom60	NonBrain		DEL	0.00948242	0.0143886	0.50988	0.741681
EA	Brain	seminal_vesicle	Tissue_Fantom60	NonBrain		DEL	-0.0153562	0.0143135	0.283338	0.538917
FI	Brain	seminal_vesicle	Tissue_Fantom60	NonBrain		DEL	-0.0011522	0.0182828	0.94975	0.978774
HeartRate	NonBrain	seminal_vesicle	Tissue_Fantom60	NonBrain		DEL	0.0315912	0.0149348	0.0344072	0.144959
MET	NonBrain	seminal_vesicle	Tissue_Fantom60	NonBrain		DEL	-0.0137227	0.0167288	0.412044	0.663072
SexPartners	NonBrain	seminal_vesicle	Tissue_Fantom60	NonBrain		DEL	-0.030096	0.0147965	0.0419536	0.16486
SymbolDigit	Brain	seminal_vesicle	Tissue_Fantom60	NonBrain		DEL	0.0342035	0.0235296	0.14605	0.367309
TrailMaking1	Brain	seminal_vesicle	Tissue_Fantom60	NonBrain		DEL	-0.0207648	0.0265729	0.434553	0.681284
TrailMaking2	Brain	seminal_vesicle	Tissue_Fantom60	NonBrain		DEL	0.0181781	0.0260241	0.484859	0.72175
VSWM1	Brain	seminal_vesicle	Tissue_Fantom60	NonBrain		DEL	0.0147191	0.0148396	0.321258	0.578037
VSWM2	Brain	seminal_vesicle	Tissue_Fantom60	NonBrain		DEL	0.018651	0.0140745	0.18512	0.422641
Menarche	NonBrain	seminal_vesicle	Tissue_Fantom60	NonBrain		DEL	-0.0155517	0.0200191	0.437251	0.683347
Menopause	NonBrain	seminal_vesicle	Tissue_Fantom60	NonBrain		DEL	-0.034528	0.0274875	0.209069	0.456433
Depression	Brain	seminal_vesicle	Tissue_Fantom60	NonBrain		DEL	0.00368248	0.00337184	0.274777	0.52989
GP	Brain	seminal_vesicle	Tissue_Fantom60	NonBrain		DEL	0.00734672	0.00684206	0.282931	0.538555
MoodSwings	Brain	seminal_vesicle	Tissue_Fantom60	NonBrain		DEL	0.0352992	0.0298195	0.236186	0.48699
RiskTaking	Brain	seminal_vesicle	Tissue_Fantom60	NonBrain		DEL	-0.00822519	0.0350537	0.814225	0.915625
Loneliness	Brain	seminal_vesicle	Tissue_Fantom60	NonBrain		DEL	-0.0158551	0.0364248	0.662458	0.834097
Irritability	Brain	seminal_vesicle	Tissue_Fantom60	NonBrain		DEL	-0.00700201	0.0334133	0.833793	0.925252
Miserableness	Brain	seminal_vesicle	Tissue_Fantom60	NonBrain		DEL	0.023774	0.0299504	0.427204	0.675422
Hypertention	NonBrain	seminal_vesicle	Tissue_Fantom60	NonBrain		DEL	-0.0320435	0.0344098	0.349754	0.606158
GuiltyFeelings	Brain	seminal_vesicle	Tissue_Fantom60	NonBrain		DEL	-0.00655237	0.0330309	0.842552	0.930425
MoodAnxiety	Brain	seminal_vesicle	Tissue_Fantom60	NonBrain		DEL	0.00678225	0.0154453	0.66058	0.832722
Albumin	NonBrain	heart_muscle	Tissue_Fantom60	NonBrain		DEL	0.0196068	0.0147329	0.18325	0.420123
BirthWeight	NonBrain	heart_muscle	Tissue_Fantom60	NonBrain		DEL	0.0142482	0.0187476	0.447254	0.691903
BMD	NonBrain	heart_muscle	Tissue_Fantom60	NonBrain		DEL	-0.00799855	0.0178192	0.653524	0.829067
BMI	NonBrain	heart_muscle	Tissue_Fantom60	NonBrain		DEL	-0.00812983	0.0138255	0.556511	0.772126
Calcium	NonBrain	heart_muscle	Tissue_Fantom60	NonBrain		DEL	0.00313197	0.0149411	0.833964	0.925334
Cholesterol	NonBrain	heart_muscle	Tissue_Fantom60	NonBrain		DEL	0.000769175	0.0140979	0.956489	0.981646
FEV1	NonBrain	heart_muscle	Tissue_Fantom60	NonBrain		DEL	-0.000498145	0.010606	0.962539	0.98459
FVC	NonBrain	heart_muscle	Tissue_Fantom60	NonBrain		DEL	-0.00508583	0.0102815	0.620842	0.809047
Gamma	NonBrain	heart_muscle	Tissue_Fantom60	NonBrain		DEL	-0.0153702	0.0133737	0.250438	0.503432
Glucose	NonBrain	heart_muscle	Tissue_Fantom60	NonBrain		DEL	-0.00648851	0.0148575	0.662318	0.834048
HbA1c	NonBrain	heart_muscle	Tissue_Fantom60	NonBrain		DEL	-0.0249925	0.0134876	0.0638838	0.217705
HDL	NonBrain	heart_muscle	Tissue_Fantom60	NonBrain		DEL	0.00527616	0.0135948	0.697942	0.853899
IGF1	NonBrain	heart_muscle	Tissue_Fantom60	NonBrain		DEL	0.0206991	0.0138231	0.134283	0.347987
LDL	NonBrain	heart_muscle	Tissue_Fantom60	NonBrain		DEL	-0.00646258	0.0142954	0.651215	0.828279
Neuroticism	Brain	heart_muscle	Tissue_Fantom60	NonBrain		DEL	0.0195094	0.0153848	0.204764	0.450802
Platelet	NonBrain	heart_muscle	Tissue_Fantom60	NonBrain		DEL	-0.0164449	0.0136312	0.227656	0.478528
Reaction	Brain	heart_muscle	Tissue_Fantom60	NonBrain		DEL	0.0192628	0.0131099	0.141743	0.359817
Redblood	NonBrain	heart_muscle	Tissue_Fantom60	NonBrain		DEL	0.0281253	0.0119717	0.0188085	0.0971084
StandingHeight	NonBrain	heart_muscle	Tissue_Fantom60	NonBrain		DEL	-0.00619696	0.00974417	0.524799	0.752723
TDI	Brain	heart_muscle	Tissue_Fantom60	NonBrain		DEL	0.00505672	0.013634	0.710719	0.861221
Triglycerides	NonBrain	heart_muscle	Tissue_Fantom60	NonBrain		DEL	0.00760718	0.013897	0.584106	0.789146
EA	Brain	heart_muscle	Tissue_Fantom60	NonBrain		DEL	-0.0177364	0.0137492	0.197053	0.439271
FI	Brain	heart_muscle	Tissue_Fantom60	NonBrain		DEL	-0.0612476	0.0178627	0.000606343	0.00773192
HeartRate	NonBrain	heart_muscle	Tissue_Fantom60	NonBrain		DEL	0.00366031	0.0143794	0.799069	0.9081
MET	NonBrain	heart_muscle	Tissue_Fantom60	NonBrain		DEL	-0.0374192	0.0165185	0.0234955	0.112993
SexPartners	NonBrain	heart_muscle	Tissue_Fantom60	NonBrain		DEL	-0.0107493	0.0144714	0.457605	0.699514
SymbolDigit	Brain	heart_muscle	Tissue_Fantom60	NonBrain		DEL	-0.00202507	0.0227687	0.929129	0.970462
TrailMaking1	Brain	heart_muscle	Tissue_Fantom60	NonBrain		DEL	0.0432252	0.025348	0.0881461	0.268837
TrailMaking2	Brain	heart_muscle	Tissue_Fantom60	NonBrain		DEL	0.021781	0.024867	0.381087	0.633873
VSWM1	Brain	heart_muscle	Tissue_Fantom60	NonBrain		DEL	-0.0154221	0.0142922	0.280562	0.535839
VSWM2	Brain	heart_muscle	Tissue_Fantom60	NonBrain		DEL	0.000893553	0.0135798	0.947537	0.977744
Menarche	NonBrain	heart_muscle	Tissue_Fantom60	NonBrain		DEL	-0.0236162	0.0192123	0.218989	0.467821
Menopause	NonBrain	heart_muscle	Tissue_Fantom60	NonBrain		DEL	-0.0028295	0.0255062	0.911669	0.961732
Depression	Brain	heart_muscle	Tissue_Fantom60	NonBrain		DEL	0.00332194	0.00324911	0.306585	0.562957
GP	Brain	heart_muscle	Tissue_Fantom60	NonBrain		DEL	0.00267309	0.0065891	0.684976	0.845756
MoodSwings	Brain	heart_muscle	Tissue_Fantom60	NonBrain		DEL	0.0204489	0.0289155	0.47913	0.717919
RiskTaking	Brain	heart_muscle	Tissue_Fantom60	NonBrain		DEL	-0.0181166	0.0347667	0.601307	0.797478
Loneliness	Brain	heart_muscle	Tissue_Fantom60	NonBrain		DEL	0.0842939	0.0331036	0.0115983	0.0695364
Irritability	Brain	heart_muscle	Tissue_Fantom60	NonBrain		DEL	0.00236056	0.0322356	0.941437	0.975137
Miserableness	Brain	heart_muscle	Tissue_Fantom60	NonBrain		DEL	0.0334434	0.0288992	0.246941	0.499419
Hypertention	NonBrain	heart_muscle	Tissue_Fantom60	NonBrain		DEL	0.0752133	0.0319117	0.0191285	0.0983849
GuiltyFeelings	Brain	heart_muscle	Tissue_Fantom60	NonBrain		DEL	-0.00501657	0.0317495	0.874255	0.94532
MoodAnxiety	Brain	heart_muscle	Tissue_Fantom60	NonBrain		DEL	0.0169205	0.0147768	0.25218	0.505361
Albumin	NonBrain	small_intestine	Tissue_Fantom60	NonBrain		DEL	-0.0389652	0.0116203	0.000798916	0.00949202
BirthWeight	NonBrain	small_intestine	Tissue_Fantom60	NonBrain		DEL	0.0175194	0.0147003	0.233354	0.483847
BMD	NonBrain	small_intestine	Tissue_Fantom60	NonBrain		DEL	0.00643179	0.0140969	0.648206	0.827073
BMI	NonBrain	small_intestine	Tissue_Fantom60	NonBrain		DEL	0.0155902	0.0109209	0.153419	0.379195
Calcium	NonBrain	small_intestine	Tissue_Fantom60	NonBrain		DEL	-0.0141218	0.011782	0.230688	0.48122
Cholesterol	NonBrain	small_intestine	Tissue_Fantom60	NonBrain		DEL	-0.0222052	0.0111147	0.0457368	0.174231
FEV1	NonBrain	small_intestine	Tissue_Fantom60	NonBrain		DEL	-0.0382689	0.00839048	5.09e-06	0.000156618
FVC	NonBrain	small_intestine	Tissue_Fantom60	NonBrain		DEL	-0.0353783	0.00813419	1.37e-05	0.000356152
Gamma	NonBrain	small_intestine	Tissue_Fantom60	NonBrain		DEL	0.0028187	0.010559	0.789509	0.902994
Glucose	NonBrain	small_intestine	Tissue_Fantom60	NonBrain		DEL	-0.0131821	0.0117063	0.260138	0.514295
HbA1c	NonBrain	small_intestine	Tissue_Fantom60	NonBrain		DEL	0.0274616	0.0106673	0.0100426	0.0626529
HDL	NonBrain	small_intestine	Tissue_Fantom60	NonBrain		DEL	0.00049572	0.0107209	0.96312	0.984829
IGF1	NonBrain	small_intestine	Tissue_Fantom60	NonBrain		DEL	-0.0410214	0.0109067	0.000169166	0.00280213
LDL	NonBrain	small_intestine	Tissue_Fantom60	NonBrain		DEL	-0.0272395	0.0112774	0.0157185	0.0860198
Neuroticism	Brain	small_intestine	Tissue_Fantom60	NonBrain		DEL	-0.00148348	0.0121801	0.903061	0.958118
Platelet	NonBrain	small_intestine	Tissue_Fantom60	NonBrain		DEL	0.0136049	0.0108067	0.208053	0.455255
Reaction	Brain	small_intestine	Tissue_Fantom60	NonBrain		DEL	0.012715	0.0103199	0.217917	0.467125
Redblood	NonBrain	small_intestine	Tissue_Fantom60	NonBrain		DEL	-0.00117865	0.00949141	0.901172	0.95718
StandingHeight	NonBrain	small_intestine	Tissue_Fantom60	NonBrain		DEL	-0.0255948	0.00769941	0.000886633	0.0103106
TDI	Brain	small_intestine	Tissue_Fantom60	NonBrain		DEL	0.0314332	0.0107644	0.00349941	0.0287733
Triglycerides	NonBrain	small_intestine	Tissue_Fantom60	NonBrain		DEL	-0.00694191	0.0109556	0.526315	0.753436
EA	Brain	small_intestine	Tissue_Fantom60	NonBrain		DEL	-0.0203437	0.0108364	0.0604714	0.210667
FI	Brain	small_intestine	Tissue_Fantom60	NonBrain		DEL	-0.00541883	0.013967	0.698036	0.853899
HeartRate	NonBrain	small_intestine	Tissue_Fantom60	NonBrain		DEL	-0.00112988	0.011426	0.921228	0.966577
MET	NonBrain	small_intestine	Tissue_Fantom60	NonBrain		DEL	0.0245573	0.0128447	0.0558939	0.200128
SexPartners	NonBrain	small_intestine	Tissue_Fantom60	NonBrain		DEL	-0.00448835	0.0114261	0.694457	0.851634
SymbolDigit	Brain	small_intestine	Tissue_Fantom60	NonBrain		DEL	-0.0121432	0.0177616	0.494181	0.729616
TrailMaking1	Brain	small_intestine	Tissue_Fantom60	NonBrain		DEL	0.0345459	0.02062	0.0938663	0.279376
TrailMaking2	Brain	small_intestine	Tissue_Fantom60	NonBrain		DEL	0.0326564	0.0199587	0.101801	0.294455
VSWM1	Brain	small_intestine	Tissue_Fantom60	NonBrain		DEL	0.0317075	0.0112897	0.00497694	0.0375991
VSWM2	Brain	small_intestine	Tissue_Fantom60	NonBrain		DEL	0.0202173	0.0107099	0.0590648	0.20728
Menarche	NonBrain	small_intestine	Tissue_Fantom60	NonBrain		DEL	0.00552771	0.0154649	0.720766	0.866258
Menopause	NonBrain	small_intestine	Tissue_Fantom60	NonBrain		DEL	-0.0154797	0.0202932	0.445582	0.69038
Depression	Brain	small_intestine	Tissue_Fantom60	NonBrain		DEL	-0.000130665	0.00256669	0.959399	0.982786
GP	Brain	small_intestine	Tissue_Fantom60	NonBrain		DEL	0.00508324	0.00520669	0.328921	0.58589
MoodSwings	Brain	small_intestine	Tissue_Fantom60	NonBrain		DEL	-0.0100795	0.022773	0.657942	0.831714
RiskTaking	Brain	small_intestine	Tissue_Fantom60	NonBrain		DEL	0.0431627	0.0263009	0.101928	0.294765
Loneliness	Brain	small_intestine	Tissue_Fantom60	NonBrain		DEL	0.00796224	0.0279052	0.775483	0.89606
Irritability	Brain	small_intestine	Tissue_Fantom60	NonBrain		DEL	0.0316529	0.0252727	0.211342	0.459394
Miserableness	Brain	small_intestine	Tissue_Fantom60	NonBrain		DEL	-0.0247064	0.0229523	0.281374	0.536767
Hypertention	NonBrain	small_intestine	Tissue_Fantom60	NonBrain		DEL	0.00628021	0.0259242	0.808608	0.913199
GuiltyFeelings	Brain	small_intestine	Tissue_Fantom60	NonBrain		DEL	-0.0175543	0.0252844	0.486828	0.723253
MoodAnxiety	Brain	small_intestine	Tissue_Fantom60	NonBrain		DEL	-0.00142363	0.0117692	0.903721	0.958345
Albumin	NonBrain	spinal_cord	Tissue_Fantom60	Brain		DEL	-0.00856555	0.0114646	0.454985	0.698249
BirthWeight	NonBrain	spinal_cord	Tissue_Fantom60	Brain		DEL	-0.0303894	0.0148153	0.0402472	0.160782
BMD	NonBrain	spinal_cord	Tissue_Fantom60	Brain		DEL	0.00430466	0.0138048	0.755175	0.885658
BMI	NonBrain	spinal_cord	Tissue_Fantom60	Brain		DEL	-0.0133396	0.0108167	0.217487	0.466483
Calcium	NonBrain	spinal_cord	Tissue_Fantom60	Brain		DEL	0.00364142	0.011627	0.754139	0.885124
Cholesterol	NonBrain	spinal_cord	Tissue_Fantom60	Brain		DEL	-0.0230015	0.0110095	0.0366864	0.151202
FEV1	NonBrain	spinal_cord	Tissue_Fantom60	Brain		DEL	0.000889356	0.00830129	0.914682	0.963262
FVC	NonBrain	spinal_cord	Tissue_Fantom60	Brain		DEL	-0.00197532	0.00804724	0.806097	0.911859
Gamma	NonBrain	spinal_cord	Tissue_Fantom60	Brain		DEL	-0.0125122	0.0104547	0.231388	0.481628
Glucose	NonBrain	spinal_cord	Tissue_Fantom60	Brain		DEL	0.00169165	0.0115465	0.883521	0.949371
HbA1c	NonBrain	spinal_cord	Tissue_Fantom60	Brain		DEL	-0.0178638	0.0106025	0.0920161	0.275793
HDL	NonBrain	spinal_cord	Tissue_Fantom60	Brain		DEL	-0.0241731	0.0105798	0.0223228	0.109012
IGF1	NonBrain	spinal_cord	Tissue_Fantom60	Brain		DEL	0.00765016	0.0107933	0.478457	0.717128
LDL	NonBrain	spinal_cord	Tissue_Fantom60	Brain		DEL	-0.0155865	0.0111672	0.162795	0.39309
Neuroticism	Brain	spinal_cord	Tissue_Fantom60	Brain		DEL	0.0514153	0.0120572	2.01e-05	0.000488694
Platelet	NonBrain	spinal_cord	Tissue_Fantom60	Brain		DEL	-0.00117388	0.0106795	0.912474	0.961964
Reaction	Brain	spinal_cord	Tissue_Fantom60	Brain		DEL	0.0185359	0.0102173	0.069653	0.230527
Redblood	NonBrain	spinal_cord	Tissue_Fantom60	Brain		DEL	-0.00106182	0.00937882	0.90986	0.961026
StandingHeight	NonBrain	spinal_cord	Tissue_Fantom60	Brain		DEL	-0.0057999	0.0076275	0.44702	0.691843
TDI	Brain	spinal_cord	Tissue_Fantom60	Brain		DEL	0.0234762	0.0106573	0.0276075	0.125691
Triglycerides	NonBrain	spinal_cord	Tissue_Fantom60	Brain		DEL	-0.00560632	0.0108537	0.605481	0.799529
EA	Brain	spinal_cord	Tissue_Fantom60	Brain		DEL	-0.0290844	0.0107344	0.00673942	0.0467587
FI	Brain	spinal_cord	Tissue_Fantom60	Brain		DEL	-0.0385008	0.0138413	0.00540973	0.040171
HeartRate	NonBrain	spinal_cord	Tissue_Fantom60	Brain		DEL	0.00387514	0.0112496	0.730494	0.873099
MET	NonBrain	spinal_cord	Tissue_Fantom60	Brain		DEL	0.00260233	0.012675	0.837328	0.927086
SexPartners	NonBrain	spinal_cord	Tissue_Fantom60	Brain		DEL	0.00428432	0.0112742	0.703938	0.857226
SymbolDigit	Brain	spinal_cord	Tissue_Fantom60	Brain		DEL	-0.043437	0.0174324	0.0127129	0.0742982
TrailMaking1	Brain	spinal_cord	Tissue_Fantom60	Brain		DEL	0.028052	0.0199534	0.159763	0.388366
TrailMaking2	Brain	spinal_cord	Tissue_Fantom60	Brain		DEL	0.032744	0.0194159	0.0917108	0.275505
VSWM1	Brain	spinal_cord	Tissue_Fantom60	Brain		DEL	0.00438166	0.0111499	0.694336	0.851556
VSWM2	Brain	spinal_cord	Tissue_Fantom60	Brain		DEL	0.0095954	0.0105928	0.36502	0.61962
Menarche	NonBrain	spinal_cord	Tissue_Fantom60	Brain		DEL	0.0273022	0.0152382	0.0731832	0.237813
Menopause	NonBrain	spinal_cord	Tissue_Fantom60	Brain		DEL	-0.0104856	0.0199565	0.599289	0.796324
Depression	Brain	spinal_cord	Tissue_Fantom60	Brain		DEL	0.00322992	0.00254147	0.203769	0.44947
GP	Brain	spinal_cord	Tissue_Fantom60	Brain		DEL	0.00900014	0.00515458	0.0808034	0.253738
MoodSwings	Brain	spinal_cord	Tissue_Fantom60	Brain		DEL	0.0803814	0.0225079	0.000351614	0.00506927
RiskTaking	Brain	spinal_cord	Tissue_Fantom60	Brain		DEL	-0.0545306	0.0268695	0.041347	0.163443
Loneliness	Brain	spinal_cord	Tissue_Fantom60	Brain		DEL	0.0944076	0.0267594	0.000468393	0.00638261
Irritability	Brain	spinal_cord	Tissue_Fantom60	Brain		DEL	0.0332608	0.0250645	0.185551	0.423104
Miserableness	Brain	spinal_cord	Tissue_Fantom60	Brain		DEL	0.124042	0.0226282	4.13e-08	2.35e-06
Hypertention	NonBrain	spinal_cord	Tissue_Fantom60	Brain		DEL	-0.0224206	0.0256281	0.380661	0.633674
GuiltyFeelings	Brain	spinal_cord	Tissue_Fantom60	Brain		DEL	0.0632074	0.0245704	0.0104037	0.0642283
MoodAnxiety	Brain	spinal_cord	Tissue_Fantom60	Brain		DEL	0.0626505	0.0116241	7.06e-08	3.77e-06
Albumin	NonBrain	globus_pallidus	Tissue_Fantom60	Brain		DEL	-0.0365935	0.0124386	0.00326204	0.0272457
BirthWeight	NonBrain	globus_pallidus	Tissue_Fantom60	Brain		DEL	-0.0594926	0.0159591	0.00019319	0.00310278
BMD	NonBrain	globus_pallidus	Tissue_Fantom60	Brain		DEL	0.0486622	0.0148099	0.00101712	0.0114674
BMI	NonBrain	globus_pallidus	Tissue_Fantom60	Brain		DEL	0.0317747	0.0117601	0.00689456	0.047523
Calcium	NonBrain	globus_pallidus	Tissue_Fantom60	Brain		DEL	-0.00299258	0.012612	0.812439	0.914849
Cholesterol	NonBrain	globus_pallidus	Tissue_Fantom60	Brain		DEL	-0.0194738	0.0119302	0.102615	0.295999
FEV1	NonBrain	globus_pallidus	Tissue_Fantom60	Brain		DEL	-0.0301154	0.00905907	0.000886356	0.0103106
FVC	NonBrain	globus_pallidus	Tissue_Fantom60	Brain		DEL	-0.0342341	0.00878185	9.69e-05	0.00175428
Gamma	NonBrain	globus_pallidus	Tissue_Fantom60	Brain		DEL	0.0163211	0.0113165	0.149233	0.372441
Glucose	NonBrain	globus_pallidus	Tissue_Fantom60	Brain		DEL	0.0233561	0.0125449	0.0626325	0.215256
HbA1c	NonBrain	globus_pallidus	Tissue_Fantom60	Brain		DEL	0.0216164	0.0115257	0.0607252	0.211164
HDL	NonBrain	globus_pallidus	Tissue_Fantom60	Brain		DEL	-0.0445597	0.0114773	0.000103435	0.00185906
IGF1	NonBrain	globus_pallidus	Tissue_Fantom60	Brain		DEL	-0.0164	0.0117072	0.16126	0.390657
LDL	NonBrain	globus_pallidus	Tissue_Fantom60	Brain		DEL	-0.00833139	0.0120982	0.491045	0.727196
Neuroticism	Brain	globus_pallidus	Tissue_Fantom60	Brain		DEL	0.0469081	0.0130872	0.000338047	0.00490234
Platelet	NonBrain	globus_pallidus	Tissue_Fantom60	Brain		DEL	0.0224586	0.0115873	0.0525984	0.192149
Reaction	Brain	globus_pallidus	Tissue_Fantom60	Brain		DEL	0.0620327	0.0111185	2.42e-08	1.41e-06
Redblood	NonBrain	globus_pallidus	Tissue_Fantom60	Brain		DEL	-0.015204	0.0101761	0.135153	0.349374
StandingHeight	NonBrain	globus_pallidus	Tissue_Fantom60	Brain		DEL	-0.0408762	0.00829343	8.28e-07	3.43e-05
TDI	Brain	globus_pallidus	Tissue_Fantom60	Brain		DEL	0.0675212	0.0115816	5.55e-09	3.66e-07
Triglycerides	NonBrain	globus_pallidus	Tissue_Fantom60	Brain		DEL	0.0177604	0.0117638	0.131107	0.342942
EA	Brain	globus_pallidus	Tissue_Fantom60	Brain		DEL	-0.0741171	0.0116591	2.06e-10	1.74e-08
FI	Brain	globus_pallidus	Tissue_Fantom60	Brain		DEL	-0.0758308	0.0156168	1.2e-06	4.64e-05
HeartRate	NonBrain	globus_pallidus	Tissue_Fantom60	Brain		DEL	0.0112861	0.0121764	0.353987	0.609641
MET	NonBrain	globus_pallidus	Tissue_Fantom60	Brain		DEL	0.0241382	0.0140432	0.0856416	0.263919
SexPartners	NonBrain	globus_pallidus	Tissue_Fantom60	Brain		DEL	-0.0142559	0.0123513	0.248419	0.501107
SymbolDigit	Brain	globus_pallidus	Tissue_Fantom60	Brain		DEL	-0.0696598	0.0196916	0.000403999	0.0056537
TrailMaking1	Brain	globus_pallidus	Tissue_Fantom60	Brain		DEL	0.0310013	0.0225537	0.169271	0.402032
TrailMaking2	Brain	globus_pallidus	Tissue_Fantom60	Brain		DEL	0.0857537	0.0219536	9.38e-05	0.00172631
VSWM1	Brain	globus_pallidus	Tissue_Fantom60	Brain		DEL	0.0073564	0.0121329	0.544302	0.764608
VSWM2	Brain	globus_pallidus	Tissue_Fantom60	Brain		DEL	0.0263194	0.0115551	0.0227431	0.11059
Menarche	NonBrain	globus_pallidus	Tissue_Fantom60	Brain		DEL	0.0166688	0.0166255	0.316052	0.572824
Menopause	NonBrain	globus_pallidus	Tissue_Fantom60	Brain		DEL	-0.0543335	0.0218048	0.0127105	0.0742982
Depression	Brain	globus_pallidus	Tissue_Fantom60	Brain		DEL	-0.000672631	0.00276189	0.807587	0.912727
GP	Brain	globus_pallidus	Tissue_Fantom60	Brain		DEL	-0.00101635	0.00560102	0.856008	0.936475
MoodSwings	Brain	globus_pallidus	Tissue_Fantom60	Brain		DEL	0.0865901	0.0244713	0.000395721	0.0055536
RiskTaking	Brain	globus_pallidus	Tissue_Fantom60	Brain		DEL	-0.0718699	0.0295976	0.014291	0.0808696
Loneliness	Brain	globus_pallidus	Tissue_Fantom60	Brain		DEL	0.12745	0.0283227	8.99e-06	0.000253199
Irritability	Brain	globus_pallidus	Tissue_Fantom60	Brain		DEL	-0.0117291	0.0274772	0.668985	0.837779
Miserableness	Brain	globus_pallidus	Tissue_Fantom60	Brain		DEL	0.118337	0.0244828	1.31e-06	4.98e-05
Hypertention	NonBrain	globus_pallidus	Tissue_Fantom60	Brain		DEL	-0.00872454	0.027776	0.753127	0.88481
GuiltyFeelings	Brain	globus_pallidus	Tissue_Fantom60	Brain		DEL	0.0455769	0.0267766	0.089856	0.272367
MoodAnxiety	Brain	globus_pallidus	Tissue_Fantom60	Brain		DEL	0.0669908	0.0125331	9.04e-08	4.73e-06
Albumin	NonBrain	smooth_muscle	Tissue_Fantom60	NonBrain		DEL	-0.0182962	0.0148103	0.216695	0.465981
BirthWeight	NonBrain	smooth_muscle	Tissue_Fantom60	NonBrain		DEL	0.0329069	0.0188569	0.0809717	0.254026
BMD	NonBrain	smooth_muscle	Tissue_Fantom60	NonBrain		DEL	-0.0509801	0.0181161	0.00489201	0.0371875
BMI	NonBrain	smooth_muscle	Tissue_Fantom60	NonBrain		DEL	0.00876659	0.0139199	0.528834	0.755613
Calcium	NonBrain	smooth_muscle	Tissue_Fantom60	NonBrain		DEL	-0.0170902	0.0150224	0.255267	0.508715
Cholesterol	NonBrain	smooth_muscle	Tissue_Fantom60	NonBrain		DEL	0.00547747	0.0141622	0.69893	0.854498
FEV1	NonBrain	smooth_muscle	Tissue_Fantom60	NonBrain		DEL	-0.0388335	0.0107158	0.000290176	0.00435323
FVC	NonBrain	smooth_muscle	Tissue_Fantom60	NonBrain		DEL	-0.0353989	0.010389	0.00065604	0.008203
Gamma	NonBrain	smooth_muscle	Tissue_Fantom60	NonBrain		DEL	-0.0106301	0.0134535	0.429447	0.67701
Glucose	NonBrain	smooth_muscle	Tissue_Fantom60	NonBrain		DEL	0.0480679	0.0148886	0.00124449	0.0133589
HbA1c	NonBrain	smooth_muscle	Tissue_Fantom60	NonBrain		DEL	0.0178297	0.0136719	0.192195	0.432191
HDL	NonBrain	smooth_muscle	Tissue_Fantom60	NonBrain		DEL	-0.0192142	0.0136649	0.159696	0.388362
IGF1	NonBrain	smooth_muscle	Tissue_Fantom60	NonBrain		DEL	0.0049989	0.0138798	0.71873	0.86518
LDL	NonBrain	smooth_muscle	Tissue_Fantom60	NonBrain		DEL	0.00741943	0.0143649	0.605507	0.799529
Neuroticism	Brain	smooth_muscle	Tissue_Fantom60	NonBrain		DEL	0.0400369	0.0156196	0.01037	0.0640798
Platelet	NonBrain	smooth_muscle	Tissue_Fantom60	NonBrain		DEL	-0.0190293	0.0137764	0.167187	0.399456
Reaction	Brain	smooth_muscle	Tissue_Fantom60	NonBrain		DEL	0.0176035	0.0131984	0.182284	0.418623
Redblood	NonBrain	smooth_muscle	Tissue_Fantom60	NonBrain		DEL	0.000358344	0.0121001	0.976374	0.990028
StandingHeight	NonBrain	smooth_muscle	Tissue_Fantom60	NonBrain		DEL	-0.0270309	0.00981228	0.00587299	0.0426477
TDI	Brain	smooth_muscle	Tissue_Fantom60	NonBrain		DEL	0.0174011	0.013725	0.204858	0.450931
Triglycerides	NonBrain	smooth_muscle	Tissue_Fantom60	NonBrain		DEL	0.0113763	0.0139706	0.415472	0.666197
EA	Brain	smooth_muscle	Tissue_Fantom60	NonBrain		DEL	-0.0547208	0.01384	7.69e-05	0.00146759
FI	Brain	smooth_muscle	Tissue_Fantom60	NonBrain		DEL	-0.0586122	0.018431	0.00147246	0.0150851
HeartRate	NonBrain	smooth_muscle	Tissue_Fantom60	NonBrain		DEL	0.0189794	0.0144703	0.189653	0.428786
MET	NonBrain	smooth_muscle	Tissue_Fantom60	NonBrain		DEL	-0.0291716	0.0165516	0.0779907	0.248354
SexPartners	NonBrain	smooth_muscle	Tissue_Fantom60	NonBrain		DEL	-0.0197091	0.0146701	0.179114	0.413718
SymbolDigit	Brain	smooth_muscle	Tissue_Fantom60	NonBrain		DEL	-0.0124297	0.0242709	0.608565	0.801408
TrailMaking1	Brain	smooth_muscle	Tissue_Fantom60	NonBrain		DEL	-0.0127793	0.0278713	0.646587	0.826077
TrailMaking2	Brain	smooth_muscle	Tissue_Fantom60	NonBrain		DEL	-0.00337123	0.0271333	0.90112	0.95718
VSWM1	Brain	smooth_muscle	Tissue_Fantom60	NonBrain		DEL	0.0147873	0.0145672	0.310055	0.566956
VSWM2	Brain	smooth_muscle	Tissue_Fantom60	NonBrain		DEL	0.0162235	0.0137604	0.238401	0.489449
Menarche	NonBrain	smooth_muscle	Tissue_Fantom60	NonBrain		DEL	0.0289353	0.0194855	0.137554	0.353676
Menopause	NonBrain	smooth_muscle	Tissue_Fantom60	NonBrain		DEL	-0.0352595	0.026068	0.176187	0.410032
Depression	Brain	smooth_muscle	Tissue_Fantom60	NonBrain		DEL	0.00434121	0.00327117	0.184472	0.421775
GP	Brain	smooth_muscle	Tissue_Fantom60	NonBrain		DEL	0.00604049	0.00666278	0.364618	0.619294
MoodSwings	Brain	smooth_muscle	Tissue_Fantom60	NonBrain		DEL	0.0812079	0.0290654	0.0051649	0.0386831
RiskTaking	Brain	smooth_muscle	Tissue_Fantom60	NonBrain		DEL	0.0029628	0.0339385	0.930346	0.970855
Loneliness	Brain	smooth_muscle	Tissue_Fantom60	NonBrain		DEL	0.0534431	0.0342828	0.121245	0.327931
Irritability	Brain	smooth_muscle	Tissue_Fantom60	NonBrain		DEL	0.0364278	0.0321521	0.258592	0.512557
Miserableness	Brain	smooth_muscle	Tissue_Fantom60	NonBrain		DEL	0.0238596	0.0292299	0.414321	0.665103
Hypertention	NonBrain	smooth_muscle	Tissue_Fantom60	NonBrain		DEL	-0.0297286	0.0333022	0.370467	0.624709
GuiltyFeelings	Brain	smooth_muscle	Tissue_Fantom60	NonBrain		DEL	0.0611407	0.0315929	0.0540523	0.195344
MoodAnxiety	Brain	smooth_muscle	Tissue_Fantom60	NonBrain		DEL	0.0296925	0.0149531	0.0470662	0.17783
Albumin	NonBrain	pancreas	Tissue_Fantom60	NonBrain		DEL	-0.0307778	0.017416	0.0771935	0.246672
BirthWeight	NonBrain	pancreas	Tissue_Fantom60	NonBrain		DEL	-0.00458487	0.0224331	0.838057	0.927634
BMD	NonBrain	pancreas	Tissue_Fantom60	NonBrain		DEL	0.0346468	0.0216174	0.108997	0.307042
BMI	NonBrain	pancreas	Tissue_Fantom60	NonBrain		DEL	0.0136599	0.0163765	0.404217	0.656115
Calcium	NonBrain	pancreas	Tissue_Fantom60	NonBrain		DEL	-0.0139498	0.0176537	0.429415	0.67701
Cholesterol	NonBrain	pancreas	Tissue_Fantom60	NonBrain		DEL	-0.0139121	0.0166189	0.402521	0.654512
FEV1	NonBrain	pancreas	Tissue_Fantom60	NonBrain		DEL	-0.00976461	0.0125511	0.436577	0.68289
FVC	NonBrain	pancreas	Tissue_Fantom60	NonBrain		DEL	-0.0120519	0.0121689	0.321985	0.579064
Gamma	NonBrain	pancreas	Tissue_Fantom60	NonBrain		DEL	0.00429497	0.0157934	0.785664	0.901131
Glucose	NonBrain	pancreas	Tissue_Fantom60	NonBrain		DEL	0.0187022	0.0174951	0.28507	0.541178
HbA1c	NonBrain	pancreas	Tissue_Fantom60	NonBrain		DEL	0.0274448	0.0159554	0.0854151	0.263495
HDL	NonBrain	pancreas	Tissue_Fantom60	NonBrain		DEL	0.0154471	0.0160663	0.336322	0.593731
IGF1	NonBrain	pancreas	Tissue_Fantom60	NonBrain		DEL	-0.000677357	0.0163028	0.966859	0.986193
LDL	NonBrain	pancreas	Tissue_Fantom60	NonBrain		DEL	-0.0160346	0.0168534	0.341393	0.598399
Neuroticism	Brain	pancreas	Tissue_Fantom60	NonBrain		DEL	-0.00473611	0.0186562	0.799602	0.908202
Platelet	NonBrain	pancreas	Tissue_Fantom60	NonBrain		DEL	0.0225762	0.0161014	0.160878	0.390053
Reaction	Brain	pancreas	Tissue_Fantom60	NonBrain		DEL	0.0307311	0.0154845	0.0471855	0.178144
Redblood	NonBrain	pancreas	Tissue_Fantom60	NonBrain		DEL	-0.0300657	0.0141408	0.0334895	0.14254
StandingHeight	NonBrain	pancreas	Tissue_Fantom60	NonBrain		DEL	-0.0245751	0.0115322	0.0330903	0.141302
TDI	Brain	pancreas	Tissue_Fantom60	NonBrain		DEL	0.000225359	0.0161145	0.988842	0.995499
Triglycerides	NonBrain	pancreas	Tissue_Fantom60	NonBrain		DEL	-0.00895787	0.0163817	0.584501	0.789151
EA	Brain	pancreas	Tissue_Fantom60	NonBrain		DEL	-0.0390366	0.0162531	0.0163153	0.088337
FI	Brain	pancreas	Tissue_Fantom60	NonBrain		DEL	-0.0326343	0.021414	0.127518	0.337372
HeartRate	NonBrain	pancreas	Tissue_Fantom60	NonBrain		DEL	0.0016401	0.0169561	0.922944	0.967417
MET	NonBrain	pancreas	Tissue_Fantom60	NonBrain		DEL	0.0283145	0.0197986	0.152682	0.378312
SexPartners	NonBrain	pancreas	Tissue_Fantom60	NonBrain		DEL	-0.0300164	0.0171976	0.0809185	0.253967
SymbolDigit	Brain	pancreas	Tissue_Fantom60	NonBrain		DEL	0.0232314	0.0281482	0.40919	0.660058
TrailMaking1	Brain	pancreas	Tissue_Fantom60	NonBrain		DEL	-0.0059906	0.0318396	0.85076	0.934049
TrailMaking2	Brain	pancreas	Tissue_Fantom60	NonBrain		DEL	0.0096322	0.030818	0.754622	0.885411
VSWM1	Brain	pancreas	Tissue_Fantom60	NonBrain		DEL	0.0025998	0.0169065	0.877787	0.946579
VSWM2	Brain	pancreas	Tissue_Fantom60	NonBrain		DEL	0.0126121	0.01613	0.434273	0.681061
Menarche	NonBrain	pancreas	Tissue_Fantom60	NonBrain		DEL	0.0170625	0.0237529	0.472554	0.712105
Menopause	NonBrain	pancreas	Tissue_Fantom60	NonBrain		DEL	0.0242796	0.0316548	0.443076	0.688465
Depression	Brain	pancreas	Tissue_Fantom60	NonBrain		DEL	0.00223333	0.00384362	0.561209	0.77605
GP	Brain	pancreas	Tissue_Fantom60	NonBrain		DEL	-0.00686149	0.00781265	0.379806	0.632906
MoodSwings	Brain	pancreas	Tissue_Fantom60	NonBrain		DEL	0.0214406	0.0343145	0.531724	0.757477
RiskTaking	Brain	pancreas	Tissue_Fantom60	NonBrain		DEL	-0.0483	0.0409863	0.235766	0.48653
Loneliness	Brain	pancreas	Tissue_Fantom60	NonBrain		DEL	0.0125123	0.0405947	0.758007	0.887066
Irritability	Brain	pancreas	Tissue_Fantom60	NonBrain		DEL	-0.0154271	0.0383533	0.686838	0.846881
Miserableness	Brain	pancreas	Tissue_Fantom60	NonBrain		DEL	0.0458858	0.0343397	0.181167	0.416509
Hypertention	NonBrain	pancreas	Tissue_Fantom60	NonBrain		DEL	-0.0576644	0.0394101	0.140932	0.358499
GuiltyFeelings	Brain	pancreas	Tissue_Fantom60	NonBrain		DEL	-0.00801614	0.0380597	0.832916	0.925252
MoodAnxiety	Brain	pancreas	Tissue_Fantom60	NonBrain		DEL	0.00997355	0.0177739	0.574706	0.784176
Albumin	NonBrain	medial_temporal_gyrus	Tissue_Fantom60	Brain		DEL	-0.0400735	0.0127666	0.00169571	0.0167667
BirthWeight	NonBrain	medial_temporal_gyrus	Tissue_Fantom60	Brain		DEL	-0.00865853	0.0163887	0.597275	0.795649
BMD	NonBrain	medial_temporal_gyrus	Tissue_Fantom60	Brain		DEL	0.0181691	0.015818	0.250708	0.503595
BMI	NonBrain	medial_temporal_gyrus	Tissue_Fantom60	Brain		DEL	0.0932065	0.0120745	1.17e-14	1.99e-12
Calcium	NonBrain	medial_temporal_gyrus	Tissue_Fantom60	Brain		DEL	-0.00686555	0.0129463	0.595897	0.795318
Cholesterol	NonBrain	medial_temporal_gyrus	Tissue_Fantom60	Brain		DEL	-0.0211988	0.0121895	0.0820171	0.256327
FEV1	NonBrain	medial_temporal_gyrus	Tissue_Fantom60	Brain		DEL	-0.074763	0.00928632	8.24e-16	1.74e-13
FVC	NonBrain	medial_temporal_gyrus	Tissue_Fantom60	Brain		DEL	-0.0820346	0.00900203	8.06e-20	3.14e-17
Gamma	NonBrain	medial_temporal_gyrus	Tissue_Fantom60	Brain		DEL	0.0397267	0.0115832	0.000604375	0.00772013
Glucose	NonBrain	medial_temporal_gyrus	Tissue_Fantom60	Brain		DEL	0.0330032	0.0129234	0.0106573	0.0651958
HbA1c	NonBrain	medial_temporal_gyrus	Tissue_Fantom60	Brain		DEL	0.0551646	0.0118568	3.28e-06	0.000108759
HDL	NonBrain	medial_temporal_gyrus	Tissue_Fantom60	Brain		DEL	-0.0364177	0.0117832	0.00199725	0.0188414
IGF1	NonBrain	medial_temporal_gyrus	Tissue_Fantom60	Brain		DEL	-0.0458724	0.0119722	0.000127344	0.00220313
LDL	NonBrain	medial_temporal_gyrus	Tissue_Fantom60	Brain		DEL	-0.0157538	0.0123611	0.202501	0.447541
Neuroticism	Brain	medial_temporal_gyrus	Tissue_Fantom60	Brain		DEL	0.00122077	0.0138497	0.929762	0.970643
Platelet	NonBrain	medial_temporal_gyrus	Tissue_Fantom60	Brain		DEL	0.021382	0.0119625	0.0738697	0.239004
Reaction	Brain	medial_temporal_gyrus	Tissue_Fantom60	Brain		DEL	0.0514777	0.0114347	6.74e-06	0.000200955
Redblood	NonBrain	medial_temporal_gyrus	Tissue_Fantom60	Brain		DEL	0.0220686	0.0105072	0.0357001	0.148461
StandingHeight	NonBrain	medial_temporal_gyrus	Tissue_Fantom60	Brain		DEL	-0.0540393	0.00848257	1.88e-10	1.6e-08
TDI	Brain	medial_temporal_gyrus	Tissue_Fantom60	Brain		DEL	0.0620641	0.0118637	1.68e-07	8.22e-06
Triglycerides	NonBrain	medial_temporal_gyrus	Tissue_Fantom60	Brain		DEL	0.0289156	0.0120258	0.0161967	0.0878552
EA	Brain	medial_temporal_gyrus	Tissue_Fantom60	Brain		DEL	-0.0500932	0.0119647	2.83e-05	0.000643148
FI	Brain	medial_temporal_gyrus	Tissue_Fantom60	Brain		DEL	-0.00981657	0.0160591	0.541017	0.762218
HeartRate	NonBrain	medial_temporal_gyrus	Tissue_Fantom60	Brain		DEL	0.0240825	0.0126145	0.0562491	0.200908
MET	NonBrain	medial_temporal_gyrus	Tissue_Fantom60	Brain		DEL	-0.0146011	0.0147123	0.320983	0.577683
SexPartners	NonBrain	medial_temporal_gyrus	Tissue_Fantom60	Brain		DEL	-0.0203073	0.013045	0.119539	0.325608
SymbolDigit	Brain	medial_temporal_gyrus	Tissue_Fantom60	Brain		DEL	0.0312645	0.0205761	0.12865	0.338912
TrailMaking1	Brain	medial_temporal_gyrus	Tissue_Fantom60	Brain		DEL	-0.0099818	0.0237731	0.674575	0.841129
TrailMaking2	Brain	medial_temporal_gyrus	Tissue_Fantom60	Brain		DEL	0.00176695	0.0228086	0.938251	0.97376
VSWM1	Brain	medial_temporal_gyrus	Tissue_Fantom60	Brain		DEL	0.0161639	0.0125428	0.197504	0.43965
VSWM2	Brain	medial_temporal_gyrus	Tissue_Fantom60	Brain		DEL	0.0166791	0.011934	0.162231	0.392327
Menarche	NonBrain	medial_temporal_gyrus	Tissue_Fantom60	Brain		DEL	-0.0537921	0.0174764	0.00208434	0.0194398
Menopause	NonBrain	medial_temporal_gyrus	Tissue_Fantom60	Brain		DEL	-0.0293531	0.0235997	0.213578	0.461982
Depression	Brain	medial_temporal_gyrus	Tissue_Fantom60	Brain		DEL	-0.00242324	0.00282771	0.391467	0.643747
GP	Brain	medial_temporal_gyrus	Tissue_Fantom60	Brain		DEL	-0.00144855	0.00575774	0.801363	0.909242
MoodSwings	Brain	medial_temporal_gyrus	Tissue_Fantom60	Brain		DEL	0.00367854	0.0254283	0.884888	0.949736
RiskTaking	Brain	medial_temporal_gyrus	Tissue_Fantom60	Brain		DEL	-0.0333526	0.0303972	0.269924	0.524365
Loneliness	Brain	medial_temporal_gyrus	Tissue_Fantom60	Brain		DEL	0.0568585	0.0291559	0.0527907	0.192572
Irritability	Brain	medial_temporal_gyrus	Tissue_Fantom60	Brain		DEL	-0.00300878	0.0281945	0.914838	0.963273
Miserableness	Brain	medial_temporal_gyrus	Tissue_Fantom60	Brain		DEL	0.0140762	0.0253742	0.57887	0.786501
Hypertention	NonBrain	medial_temporal_gyrus	Tissue_Fantom60	Brain		DEL	0.0579479	0.0279771	0.039501	0.158949
GuiltyFeelings	Brain	medial_temporal_gyrus	Tissue_Fantom60	Brain		DEL	0.0196944	0.0277934	0.479328	0.718069
MoodAnxiety	Brain	medial_temporal_gyrus	Tissue_Fantom60	Brain		DEL	0.00328744	0.0130203	0.800666	0.908937
Albumin	NonBrain	skeletal_muscle	Tissue_Fantom60	NonBrain		DEL	-0.0108452	0.0170104	0.523759	0.751941
BirthWeight	NonBrain	skeletal_muscle	Tissue_Fantom60	NonBrain		DEL	0.00209742	0.0215676	0.922529	0.967393
BMD	NonBrain	skeletal_muscle	Tissue_Fantom60	NonBrain		DEL	-0.0313678	0.0209086	0.133555	0.346829
BMI	NonBrain	skeletal_muscle	Tissue_Fantom60	NonBrain		DEL	0.0183831	0.0161563	0.255193	0.508715
Calcium	NonBrain	skeletal_muscle	Tissue_Fantom60	NonBrain		DEL	-0.0352178	0.01725	0.0411908	0.162974
Cholesterol	NonBrain	skeletal_muscle	Tissue_Fantom60	NonBrain		DEL	-0.0103319	0.0164011	0.528724	0.755569
FEV1	NonBrain	skeletal_muscle	Tissue_Fantom60	NonBrain		DEL	-0.0447363	0.01234	0.000288647	0.00433469
FVC	NonBrain	skeletal_muscle	Tissue_Fantom60	NonBrain		DEL	-0.0369484	0.011963	0.00201144	0.018915
Gamma	NonBrain	skeletal_muscle	Tissue_Fantom60	NonBrain		DEL	-0.0131729	0.0155674	0.39745	0.649349
Glucose	NonBrain	skeletal_muscle	Tissue_Fantom60	NonBrain		DEL	-0.00124209	0.0171104	0.942131	0.975364
HbA1c	NonBrain	skeletal_muscle	Tissue_Fantom60	NonBrain		DEL	-0.0407125	0.0158225	0.0100801	0.0628337
HDL	NonBrain	skeletal_muscle	Tissue_Fantom60	NonBrain		DEL	-0.0129443	0.0156949	0.409517	0.660494
IGF1	NonBrain	skeletal_muscle	Tissue_Fantom60	NonBrain		DEL	-0.00247573	0.0161016	0.877801	0.946579
LDL	NonBrain	skeletal_muscle	Tissue_Fantom60	NonBrain		DEL	-0.0100995	0.0166311	0.543675	0.764234
Neuroticism	Brain	skeletal_muscle	Tissue_Fantom60	NonBrain		DEL	0.0308796	0.0181681	0.0891955	0.27092
Platelet	NonBrain	skeletal_muscle	Tissue_Fantom60	NonBrain		DEL	-0.0327895	0.0158962	0.0391399	0.158358
Reaction	Brain	skeletal_muscle	Tissue_Fantom60	NonBrain		DEL	0.0121105	0.0152817	0.428079	0.676367
Redblood	NonBrain	skeletal_muscle	Tissue_Fantom60	NonBrain		DEL	0.0176346	0.0139617	0.206563	0.453161
StandingHeight	NonBrain	skeletal_muscle	Tissue_Fantom60	NonBrain		DEL	-0.0350529	0.011391	0.00208932	0.0194572
TDI	Brain	skeletal_muscle	Tissue_Fantom60	NonBrain		DEL	0.060216	0.0159147	0.000154552	0.00259788
Triglycerides	NonBrain	skeletal_muscle	Tissue_Fantom60	NonBrain		DEL	0.0170563	0.0161686	0.29147	0.547276
EA	Brain	skeletal_muscle	Tissue_Fantom60	NonBrain		DEL	-0.0262075	0.0160678	0.102879	0.29653
FI	Brain	skeletal_muscle	Tissue_Fantom60	NonBrain		DEL	-0.10125	0.0205998	8.88e-07	3.6e-05
HeartRate	NonBrain	skeletal_muscle	Tissue_Fantom60	NonBrain		DEL	0.0476726	0.0168316	0.00462138	0.0354833
MET	NonBrain	skeletal_muscle	Tissue_Fantom60	NonBrain		DEL	-0.0261778	0.0194833	0.179077	0.413698
SexPartners	NonBrain	skeletal_muscle	Tissue_Fantom60	NonBrain		DEL	-0.0193992	0.0170033	0.253909	0.507474
SymbolDigit	Brain	skeletal_muscle	Tissue_Fantom60	NonBrain		DEL	0.021365	0.0270056	0.428868	0.676673
TrailMaking1	Brain	skeletal_muscle	Tissue_Fantom60	NonBrain		DEL	0.0320133	0.0299685	0.285418	0.541547
TrailMaking2	Brain	skeletal_muscle	Tissue_Fantom60	NonBrain		DEL	0.0561567	0.0295449	0.0573405	0.203387
VSWM1	Brain	skeletal_muscle	Tissue_Fantom60	NonBrain		DEL	0.0160444	0.0166453	0.335097	0.592707
VSWM2	Brain	skeletal_muscle	Tissue_Fantom60	NonBrain		DEL	0.0211974	0.0157932	0.179537	0.413889
Menarche	NonBrain	skeletal_muscle	Tissue_Fantom60	NonBrain		DEL	-0.0200631	0.0227119	0.377037	0.631304
Menopause	NonBrain	skeletal_muscle	Tissue_Fantom60	NonBrain		DEL	-0.0296126	0.0314072	0.345753	0.602756
Depression	Brain	skeletal_muscle	Tissue_Fantom60	NonBrain		DEL	0.00760176	0.00379546	0.0451932	0.172612
GP	Brain	skeletal_muscle	Tissue_Fantom60	NonBrain		DEL	0.00765615	0.0076939	0.319691	0.576692
MoodSwings	Brain	skeletal_muscle	Tissue_Fantom60	NonBrain		DEL	0.0202154	0.0340031	0.551873	0.768962
RiskTaking	Brain	skeletal_muscle	Tissue_Fantom60	NonBrain		DEL	0.00527224	0.0400458	0.895109	0.954939
Loneliness	Brain	skeletal_muscle	Tissue_Fantom60	NonBrain		DEL	0.0828391	0.0388134	0.0338343	0.143527
Irritability	Brain	skeletal_muscle	Tissue_Fantom60	NonBrain		DEL	0.0223704	0.037598	0.552276	0.768962
Miserableness	Brain	skeletal_muscle	Tissue_Fantom60	NonBrain		DEL	0.0712095	0.0340264	0.036186	0.149892
Hypertention	NonBrain	skeletal_muscle	Tissue_Fantom60	NonBrain		DEL	0.0322994	0.0380824	0.397333	0.649349
GuiltyFeelings	Brain	skeletal_muscle	Tissue_Fantom60	NonBrain		DEL	0.0652834	0.0365128	0.0748198	0.240961
MoodAnxiety	Brain	skeletal_muscle	Tissue_Fantom60	NonBrain		DEL	0.0295004	0.0172705	0.0876122	0.26776
Albumin	NonBrain	breast	Tissue_Fantom60	NonBrain		DEL	0.0079528	0.0129736	0.539878	0.761793
BirthWeight	NonBrain	breast	Tissue_Fantom60	NonBrain		DEL	-0.00429047	0.0164651	0.794417	0.905177
BMD	NonBrain	breast	Tissue_Fantom60	NonBrain		DEL	0.0109413	0.0157082	0.486096	0.722791
BMI	NonBrain	breast	Tissue_Fantom60	NonBrain		DEL	0.00811587	0.0121892	0.505523	0.738173
Calcium	NonBrain	breast	Tissue_Fantom60	NonBrain		DEL	0.00393943	0.0131538	0.764566	0.890495
Cholesterol	NonBrain	breast	Tissue_Fantom60	NonBrain		DEL	0.00775908	0.0124341	0.532617	0.758056
FEV1	NonBrain	breast	Tissue_Fantom60	NonBrain		DEL	-0.00426833	0.00939062	0.649447	0.827657
FVC	NonBrain	breast	Tissue_Fantom60	NonBrain		DEL	0.00215749	0.00910421	0.812675	0.914854
Gamma	NonBrain	breast	Tissue_Fantom60	NonBrain		DEL	0.0142477	0.0117987	0.227217	0.478025
Glucose	NonBrain	breast	Tissue_Fantom60	NonBrain		DEL	-0.000440077	0.0130649	0.973129	0.988703
HbA1c	NonBrain	breast	Tissue_Fantom60	NonBrain		DEL	-0.0117312	0.0119496	0.326238	0.583027
HDL	NonBrain	breast	Tissue_Fantom60	NonBrain		DEL	-0.0110117	0.0119711	0.357646	0.612374
IGF1	NonBrain	breast	Tissue_Fantom60	NonBrain		DEL	-0.00563638	0.0121975	0.644015	0.824251
LDL	NonBrain	breast	Tissue_Fantom60	NonBrain		DEL	0.015014	0.0126112	0.23384	0.484418
Neuroticism	Brain	breast	Tissue_Fantom60	NonBrain		DEL	-0.00777454	0.0135605	0.566427	0.77918
Platelet	NonBrain	breast	Tissue_Fantom60	NonBrain		DEL	-0.00715487	0.0120665	0.553211	0.769522
Reaction	Brain	breast	Tissue_Fantom60	NonBrain		DEL	0.00341591	0.0115459	0.767341	0.891611
Redblood	NonBrain	breast	Tissue_Fantom60	NonBrain		DEL	0.0112105	0.0105974	0.290121	0.546545
StandingHeight	NonBrain	breast	Tissue_Fantom60	NonBrain		DEL	-0.00493942	0.00859774	0.565628	0.77904
TDI	Brain	breast	Tissue_Fantom60	NonBrain		DEL	-0.0016101	0.012016	0.893405	0.954351
Triglycerides	NonBrain	breast	Tissue_Fantom60	NonBrain		DEL	0.0110339	0.0122582	0.368053	0.62227
EA	Brain	breast	Tissue_Fantom60	NonBrain		DEL	0.0124436	0.0121252	0.304771	0.560927
FI	Brain	breast	Tissue_Fantom60	NonBrain		DEL	-0.000393671	0.0154712	0.9797	0.991497
HeartRate	NonBrain	breast	Tissue_Fantom60	NonBrain		DEL	0.00623581	0.0127065	0.623597	0.810329
MET	NonBrain	breast	Tissue_Fantom60	NonBrain		DEL	-0.0141341	0.014175	0.318711	0.575964
SexPartners	NonBrain	breast	Tissue_Fantom60	NonBrain		DEL	0.0054927	0.0127188	0.665845	0.835679
SymbolDigit	Brain	breast	Tissue_Fantom60	NonBrain		DEL	0.00672206	0.0198384	0.73473	0.875826
TrailMaking1	Brain	breast	Tissue_Fantom60	NonBrain		DEL	0.0196945	0.0225718	0.382923	0.635071
TrailMaking2	Brain	breast	Tissue_Fantom60	NonBrain		DEL	-0.00671854	0.0219548	0.759592	0.887651
VSWM1	Brain	breast	Tissue_Fantom60	NonBrain		DEL	-0.000582136	0.0126267	0.963228	0.984829
VSWM2	Brain	breast	Tissue_Fantom60	NonBrain		DEL	-0.0124848	0.0119857	0.297577	0.554427
Menarche	NonBrain	breast	Tissue_Fantom60	NonBrain		DEL	-0.00312359	0.0170461	0.854607	0.935842
Menopause	NonBrain	breast	Tissue_Fantom60	NonBrain		DEL	-0.00344931	0.0222324	0.876705	0.946188
Depression	Brain	breast	Tissue_Fantom60	NonBrain		DEL	0.00507638	0.0028663	0.0765522	0.244994
GP	Brain	breast	Tissue_Fantom60	NonBrain		DEL	0.00369264	0.00581189	0.525195	0.752788
MoodSwings	Brain	breast	Tissue_Fantom60	NonBrain		DEL	0.0147845	0.0254942	0.561886	0.776286
RiskTaking	Brain	breast	Tissue_Fantom60	NonBrain		DEL	0.0229783	0.0294829	0.436686	0.68289
Loneliness	Brain	breast	Tissue_Fantom60	NonBrain		DEL	-0.0080563	0.0312828	0.796497	0.906446
Irritability	Brain	breast	Tissue_Fantom60	NonBrain		DEL	-0.0135632	0.0285002	0.633645	0.817057
Miserableness	Brain	breast	Tissue_Fantom60	NonBrain		DEL	0.00530283	0.0255818	0.835743	0.926234
Hypertention	NonBrain	breast	Tissue_Fantom60	NonBrain		DEL	-0.00538883	0.0287759	0.851326	0.934323
GuiltyFeelings	Brain	breast	Tissue_Fantom60	NonBrain		DEL	-0.0330968	0.0283266	0.241164	0.492287
MoodAnxiety	Brain	breast	Tissue_Fantom60	NonBrain		DEL	-0.0134094	0.0130525	0.304261	0.560497
Albumin	NonBrain	kidney	Tissue_Fantom60	NonBrain		DEL	-0.0174081	0.0134386	0.195189	0.437195
BirthWeight	NonBrain	kidney	Tissue_Fantom60	NonBrain		DEL	0.0120652	0.0172197	0.483514	0.72075
BMD	NonBrain	kidney	Tissue_Fantom60	NonBrain		DEL	0.0223297	0.0161935	0.167918	0.400583
BMI	NonBrain	kidney	Tissue_Fantom60	NonBrain		DEL	-0.000745867	0.0126968	0.953156	0.980359
Calcium	NonBrain	kidney	Tissue_Fantom60	NonBrain		DEL	0.00404676	0.0136261	0.766477	0.891611
Cholesterol	NonBrain	kidney	Tissue_Fantom60	NonBrain		DEL	-0.00526511	0.0128497	0.681992	0.84402
FEV1	NonBrain	kidney	Tissue_Fantom60	NonBrain		DEL	-0.0188604	0.00980357	0.054377	0.196277
FVC	NonBrain	kidney	Tissue_Fantom60	NonBrain		DEL	-0.0210728	0.00950433	0.0266112	0.12246
Gamma	NonBrain	kidney	Tissue_Fantom60	NonBrain		DEL	-0.0118869	0.0121982	0.329819	0.586945
Glucose	NonBrain	kidney	Tissue_Fantom60	NonBrain		DEL	-0.00267476	0.0135307	0.843294	0.93074
HbA1c	NonBrain	kidney	Tissue_Fantom60	NonBrain		DEL	0.0172828	0.0123662	0.162241	0.392327
HDL	NonBrain	kidney	Tissue_Fantom60	NonBrain		DEL	0.0289299	0.0124016	0.0196617	0.100184
IGF1	NonBrain	kidney	Tissue_Fantom60	NonBrain		DEL	-0.0156812	0.012603	0.213411	0.461922
LDL	NonBrain	kidney	Tissue_Fantom60	NonBrain		DEL	-0.0100003	0.0130391	0.443111	0.688465
Neuroticism	Brain	kidney	Tissue_Fantom60	NonBrain		DEL	-0.032524	0.0143139	0.023075	0.111771
Platelet	NonBrain	kidney	Tissue_Fantom60	NonBrain		DEL	0.0243531	0.01256	0.0525101	0.192022
Reaction	Brain	kidney	Tissue_Fantom60	NonBrain		DEL	-0.00876785	0.0120139	0.465507	0.705655
Redblood	NonBrain	kidney	Tissue_Fantom60	NonBrain		DEL	0.00572532	0.0110312	0.603753	0.798526
StandingHeight	NonBrain	kidney	Tissue_Fantom60	NonBrain		DEL	-0.0360367	0.0089595	5.77e-05	0.00116385
TDI	Brain	kidney	Tissue_Fantom60	NonBrain		DEL	-0.00566886	0.0125166	0.650615	0.828189
Triglycerides	NonBrain	kidney	Tissue_Fantom60	NonBrain		DEL	-0.0166491	0.0126677	0.188747	0.42736
EA	Brain	kidney	Tissue_Fantom60	NonBrain		DEL	0.000395679	0.0126236	0.974995	0.989443
FI	Brain	kidney	Tissue_Fantom60	NonBrain		DEL	-0.0301872	0.0164239	0.0660625	0.222292
HeartRate	NonBrain	kidney	Tissue_Fantom60	NonBrain		DEL	-0.00083819	0.0132911	0.949716	0.978774
MET	NonBrain	kidney	Tissue_Fantom60	NonBrain		DEL	0.024902	0.0149853	0.0965615	0.285296
SexPartners	NonBrain	kidney	Tissue_Fantom60	NonBrain		DEL	-0.0168164	0.0133471	0.207696	0.454742
SymbolDigit	Brain	kidney	Tissue_Fantom60	NonBrain		DEL	-0.00794704	0.0207343	0.701512	0.855745
TrailMaking1	Brain	kidney	Tissue_Fantom60	NonBrain		DEL	-0.0146057	0.0233304	0.531294	0.757192
TrailMaking2	Brain	kidney	Tissue_Fantom60	NonBrain		DEL	0.00298145	0.0227024	0.895516	0.954939
VSWM1	Brain	kidney	Tissue_Fantom60	NonBrain		DEL	0.0129223	0.0131382	0.32533	0.582424
VSWM2	Brain	kidney	Tissue_Fantom60	NonBrain		DEL	0.00204654	0.0125229	0.870185	0.94361
Menarche	NonBrain	kidney	Tissue_Fantom60	NonBrain		DEL	-0.0271323	0.0180357	0.132489	0.345276
Menopause	NonBrain	kidney	Tissue_Fantom60	NonBrain		DEL	-0.0117612	0.0236578	0.619092	0.808603
Depression	Brain	kidney	Tissue_Fantom60	NonBrain		DEL	-0.00262677	0.00298511	0.378883	0.631913
GP	Brain	kidney	Tissue_Fantom60	NonBrain		DEL	-0.0117	0.00606003	0.0535225	0.194297
MoodSwings	Brain	kidney	Tissue_Fantom60	NonBrain		DEL	-0.00853433	0.0265527	0.747708	0.882593
RiskTaking	Brain	kidney	Tissue_Fantom60	NonBrain		DEL	-0.0540558	0.0318254	0.0869719	0.266464
Loneliness	Brain	kidney	Tissue_Fantom60	NonBrain		DEL	-0.0615849	0.0331437	0.0603854	0.210596
Irritability	Brain	kidney	Tissue_Fantom60	NonBrain		DEL	0.0373438	0.0292984	0.204092	0.449847
Miserableness	Brain	kidney	Tissue_Fantom60	NonBrain		DEL	-0.0207936	0.0266859	0.435286	0.681799
Hypertention	NonBrain	kidney	Tissue_Fantom60	NonBrain		DEL	-0.00418467	0.0300978	0.889253	0.952051
GuiltyFeelings	Brain	kidney	Tissue_Fantom60	NonBrain		DEL	-0.0666491	0.0300971	0.0254327	0.119543
MoodAnxiety	Brain	kidney	Tissue_Fantom60	NonBrain		DEL	-0.0225614	0.0136186	0.0975888	0.286814
Albumin	NonBrain	retina	Tissue_Fantom60	NonBrain		DEL	0.00166927	0.0135395	0.901878	0.957368
BirthWeight	NonBrain	retina	Tissue_Fantom60	NonBrain		DEL	0.0257688	0.0169344	0.12809	0.338098
BMD	NonBrain	retina	Tissue_Fantom60	NonBrain		DEL	0.0104038	0.0164003	0.525843	0.753022
BMI	NonBrain	retina	Tissue_Fantom60	NonBrain		DEL	-0.00147594	0.0127415	0.907782	0.960167
Calcium	NonBrain	retina	Tissue_Fantom60	NonBrain		DEL	-0.0153913	0.0137294	0.262267	0.517123
Cholesterol	NonBrain	retina	Tissue_Fantom60	NonBrain		DEL	-0.0263401	0.0129902	0.0425919	0.166144
FEV1	NonBrain	retina	Tissue_Fantom60	NonBrain		DEL	-0.00520977	0.00972853	0.592294	0.79334
FVC	NonBrain	retina	Tissue_Fantom60	NonBrain		DEL	-0.00481331	0.00943311	0.609872	0.802404
Gamma	NonBrain	retina	Tissue_Fantom60	NonBrain		DEL	-0.00969339	0.012319	0.431361	0.678508
Glucose	NonBrain	retina	Tissue_Fantom60	NonBrain		DEL	0.00269912	0.0136465	0.843211	0.93074
HbA1c	NonBrain	retina	Tissue_Fantom60	NonBrain		DEL	-0.043161	0.012507	0.000558708	0.00725584
HDL	NonBrain	retina	Tissue_Fantom60	NonBrain		DEL	-0.0225527	0.0124934	0.0710494	0.23334
IGF1	NonBrain	retina	Tissue_Fantom60	NonBrain		DEL	-0.0276758	0.0127555	0.0300291	0.132476
LDL	NonBrain	retina	Tissue_Fantom60	NonBrain		DEL	-0.0201333	0.0131749	0.126473	0.336416
Neuroticism	Brain	retina	Tissue_Fantom60	NonBrain		DEL	0.0166847	0.0142842	0.242788	0.494196
Platelet	NonBrain	retina	Tissue_Fantom60	NonBrain		DEL	-0.0153025	0.0125514	0.222775	0.4719
Reaction	Brain	retina	Tissue_Fantom60	NonBrain		DEL	-0.00779897	0.012073	0.518292	0.747786
Redblood	NonBrain	retina	Tissue_Fantom60	NonBrain		DEL	0.0129095	0.0110236	0.241568	0.49266
StandingHeight	NonBrain	retina	Tissue_Fantom60	NonBrain		DEL	0.0160584	0.00898641	0.0739443	0.239126
TDI	Brain	retina	Tissue_Fantom60	NonBrain		DEL	0.0139794	0.0125635	0.265839	0.52061
Triglycerides	NonBrain	retina	Tissue_Fantom60	NonBrain		DEL	-0.00144353	0.0128012	0.910217	0.961092
EA	Brain	retina	Tissue_Fantom60	NonBrain		DEL	-0.00784249	0.0126924	0.536649	0.760356
FI	Brain	retina	Tissue_Fantom60	NonBrain		DEL	-0.0192461	0.016628	0.247091	0.499654
HeartRate	NonBrain	retina	Tissue_Fantom60	NonBrain		DEL	0.0272592	0.0133052	0.0404864	0.161422
MET	NonBrain	retina	Tissue_Fantom60	NonBrain		DEL	-0.0210212	0.0150181	0.161596	0.391153
SexPartners	NonBrain	retina	Tissue_Fantom60	NonBrain		DEL	-0.00593743	0.0134594	0.659114	0.83222
SymbolDigit	Brain	retina	Tissue_Fantom60	NonBrain		DEL	0.0238593	0.0213318	0.263363	0.518436
TrailMaking1	Brain	retina	Tissue_Fantom60	NonBrain		DEL	-0.00659441	0.0241908	0.785162	0.901131
TrailMaking2	Brain	retina	Tissue_Fantom60	NonBrain		DEL	-0.0106316	0.0235506	0.651676	0.828323
VSWM1	Brain	retina	Tissue_Fantom60	NonBrain		DEL	-0.000555277	0.0131455	0.966307	0.986083
VSWM2	Brain	retina	Tissue_Fantom60	NonBrain		DEL	-0.000654718	0.0125029	0.958238	0.982268
Menarche	NonBrain	retina	Tissue_Fantom60	NonBrain		DEL	0.0188427	0.0179523	0.293902	0.550513
Menopause	NonBrain	retina	Tissue_Fantom60	NonBrain		DEL	-0.0293788	0.0238665	0.218338	0.467395
Depression	Brain	retina	Tissue_Fantom60	NonBrain		DEL	0.00243078	0.0029963	0.417216	0.667346
GP	Brain	retina	Tissue_Fantom60	NonBrain		DEL	0.00416887	0.00606633	0.491948	0.727907
MoodSwings	Brain	retina	Tissue_Fantom60	NonBrain		DEL	-0.00843526	0.0265558	0.75061	0.883831
RiskTaking	Brain	retina	Tissue_Fantom60	NonBrain		DEL	0.0230509	0.0313288	0.463011	0.703602
Loneliness	Brain	retina	Tissue_Fantom60	NonBrain		DEL	0.0419636	0.0310739	0.178875	0.413516
Irritability	Brain	retina	Tissue_Fantom60	NonBrain		DEL	-0.02594	0.030013	0.385722	0.637924
Miserableness	Brain	retina	Tissue_Fantom60	NonBrain		DEL	0.0095374	0.0266404	0.720204	0.865973
Hypertention	NonBrain	retina	Tissue_Fantom60	NonBrain		DEL	0.0209563	0.0299558	0.484848	0.72175
GuiltyFeelings	Brain	retina	Tissue_Fantom60	NonBrain		DEL	0.0521518	0.0289703	0.0730131	0.237417
MoodAnxiety	Brain	retina	Tissue_Fantom60	NonBrain		DEL	0.0197871	0.0137546	0.150271	0.374272
Albumin	NonBrain	amygdala	Tissue_Fantom60	Brain		DEL	-0.0568936	0.0145418	9.14e-05	0.00168774
BirthWeight	NonBrain	amygdala	Tissue_Fantom60	Brain		DEL	-0.0501937	0.0189656	0.00813192	0.0536012
BMD	NonBrain	amygdala	Tissue_Fantom60	Brain		DEL	-0.0151437	0.0183233	0.408538	0.659485
BMI	NonBrain	amygdala	Tissue_Fantom60	Brain		DEL	0.102566	0.0137193	7.68e-14	1.21e-11
Calcium	NonBrain	amygdala	Tissue_Fantom60	Brain		DEL	-0.0318026	0.0147416	0.0309796	0.134978
Cholesterol	NonBrain	amygdala	Tissue_Fantom60	Brain		DEL	-0.0333616	0.0138571	0.0160608	0.0873104
FEV1	NonBrain	amygdala	Tissue_Fantom60	Brain		DEL	-0.106377	0.0105249	5.17e-24	4.02e-21
FVC	NonBrain	amygdala	Tissue_Fantom60	Brain		DEL	-0.104587	0.0102028	1.18e-24	1.03e-21
Gamma	NonBrain	amygdala	Tissue_Fantom60	Brain		DEL	0.0559371	0.013185	2.21e-05	0.000527535
Glucose	NonBrain	amygdala	Tissue_Fantom60	Brain		DEL	0.024724	0.0147405	0.0934893	0.278472
HbA1c	NonBrain	amygdala	Tissue_Fantom60	Brain		DEL	0.0824753	0.0134328	8.27e-10	6.3e-08
HDL	NonBrain	amygdala	Tissue_Fantom60	Brain		DEL	-0.0553585	0.0134171	3.69e-05	0.000809172
IGF1	NonBrain	amygdala	Tissue_Fantom60	Brain		DEL	-0.0698265	0.0135809	2.73e-07	1.24e-05
LDL	NonBrain	amygdala	Tissue_Fantom60	Brain		DEL	-0.0291419	0.0140525	0.0380996	0.155296
Neuroticism	Brain	amygdala	Tissue_Fantom60	Brain		DEL	0.00942773	0.0159801	0.555213	0.771146
Platelet	NonBrain	amygdala	Tissue_Fantom60	Brain		DEL	0.0290942	0.013562	0.0319316	0.137827
Reaction	Brain	amygdala	Tissue_Fantom60	Brain		DEL	0.0464955	0.0130268	0.000358086	0.0051261
Redblood	NonBrain	amygdala	Tissue_Fantom60	Brain		DEL	0.00211159	0.0119116	0.859296	0.938267
StandingHeight	NonBrain	amygdala	Tissue_Fantom60	Brain		DEL	-0.068819	0.00961737	8.34e-13	1.17e-10
TDI	Brain	amygdala	Tissue_Fantom60	Brain		DEL	0.076131	0.013437	1.46e-08	8.92e-07
Triglycerides	NonBrain	amygdala	Tissue_Fantom60	Brain		DEL	0.0459862	0.0136706	0.000768652	0.00923632
EA	Brain	amygdala	Tissue_Fantom60	Brain		DEL	-0.0503688	0.0135818	0.000208473	0.00330872
FI	Brain	amygdala	Tissue_Fantom60	Brain		DEL	-0.0124898	0.0185953	0.501797	0.735273
HeartRate	NonBrain	amygdala	Tissue_Fantom60	Brain		DEL	0.0325535	0.0143707	0.0234969	0.112993
MET	NonBrain	amygdala	Tissue_Fantom60	Brain		DEL	-0.0316357	0.0169515	0.0620067	0.213698
SexPartners	NonBrain	amygdala	Tissue_Fantom60	Brain		DEL	-0.0182627	0.0150497	0.224941	0.474926
SymbolDigit	Brain	amygdala	Tissue_Fantom60	Brain		DEL	-0.00464127	0.0249418	0.852379	0.934855
TrailMaking1	Brain	amygdala	Tissue_Fantom60	Brain		DEL	-0.0332819	0.0288991	0.249463	0.502528
TrailMaking2	Brain	amygdala	Tissue_Fantom60	Brain		DEL	-0.00659048	0.0280468	0.814224	0.915625
VSWM1	Brain	amygdala	Tissue_Fantom60	Brain		DEL	0.0362849	0.0142526	0.0109017	0.0664163
VSWM2	Brain	amygdala	Tissue_Fantom60	Brain		DEL	0.0202876	0.0136105	0.136071	0.350962
Menarche	NonBrain	amygdala	Tissue_Fantom60	Brain		DEL	-0.048248	0.0203223	0.0175908	0.0926816
Menopause	NonBrain	amygdala	Tissue_Fantom60	Brain		DEL	-0.0187935	0.0290746	0.518028	0.747723
Depression	Brain	amygdala	Tissue_Fantom60	Brain		DEL	-0.00132324	0.0032049	0.679696	0.843241
GP	Brain	amygdala	Tissue_Fantom60	Brain		DEL	-0.0137369	0.00655181	0.036024	0.14943
MoodSwings	Brain	amygdala	Tissue_Fantom60	Brain		DEL	0.026884	0.0291905	0.356222	0.610926
RiskTaking	Brain	amygdala	Tissue_Fantom60	Brain		DEL	-0.0127773	0.0345133	0.710477	0.861109
Loneliness	Brain	amygdala	Tissue_Fantom60	Brain		DEL	0.0600671	0.0326126	0.067064	0.224487
Irritability	Brain	amygdala	Tissue_Fantom60	Brain		DEL	0.0288499	0.0317108	0.363994	0.618589
Miserableness	Brain	amygdala	Tissue_Fantom60	Brain		DEL	0.023496	0.0290052	0.417424	0.66759
Hypertention	NonBrain	amygdala	Tissue_Fantom60	Brain		DEL	0.0575527	0.0317342	0.0712836	0.233934
GuiltyFeelings	Brain	amygdala	Tissue_Fantom60	Brain		DEL	0.0394767	0.031546	0.212438	0.460627
MoodAnxiety	Brain	amygdala	Tissue_Fantom60	Brain		DEL	0.0269271	0.0147473	0.0678662	0.226321
Albumin	NonBrain	olfactory_bulb	Tissue_Fantom60	Brain		DEL	-0.0645891	0.0164197	8.37e-05	0.00157889
BirthWeight	NonBrain	olfactory_bulb	Tissue_Fantom60	Brain		DEL	-0.0235854	0.0213926	0.270244	0.524808
BMD	NonBrain	olfactory_bulb	Tissue_Fantom60	Brain		DEL	-0.0100632	0.020545	0.624265	0.810642
BMI	NonBrain	olfactory_bulb	Tissue_Fantom60	Brain		DEL	0.123417	0.0154783	1.55e-15	3.09e-13
Calcium	NonBrain	olfactory_bulb	Tissue_Fantom60	Brain		DEL	-0.0287162	0.0166494	0.0845706	0.261928
Cholesterol	NonBrain	olfactory_bulb	Tissue_Fantom60	Brain		DEL	-0.0402385	0.0156498	0.0101356	0.06305
FEV1	NonBrain	olfactory_bulb	Tissue_Fantom60	Brain		DEL	-0.126139	0.0118792	2.47e-26	2.72e-23
FVC	NonBrain	olfactory_bulb	Tissue_Fantom60	Brain		DEL	-0.129592	0.0115156	2.24e-29	6.65e-26
Gamma	NonBrain	olfactory_bulb	Tissue_Fantom60	Brain		DEL	0.0633716	0.0148719	2.03e-05	0.000493367
Glucose	NonBrain	olfactory_bulb	Tissue_Fantom60	Brain		DEL	0.0379111	0.0166106	0.02247	0.109514
HbA1c	NonBrain	olfactory_bulb	Tissue_Fantom60	Brain		DEL	0.0786173	0.0151487	2.11e-07	9.99e-06
HDL	NonBrain	olfactory_bulb	Tissue_Fantom60	Brain		DEL	-0.0478799	0.015152	0.00157797	0.0158676
IGF1	NonBrain	olfactory_bulb	Tissue_Fantom60	Brain		DEL	-0.0607437	0.0153341	7.45e-05	0.00143381
LDL	NonBrain	olfactory_bulb	Tissue_Fantom60	Brain		DEL	-0.0369107	0.0158684	0.0200161	0.101258
Neuroticism	Brain	olfactory_bulb	Tissue_Fantom60	Brain		DEL	0.0114793	0.0177777	0.518464	0.747786
Platelet	NonBrain	olfactory_bulb	Tissue_Fantom60	Brain		DEL	0.0141389	0.0152805	0.354816	0.609746
Reaction	Brain	olfactory_bulb	Tissue_Fantom60	Brain		DEL	0.0578226	0.0146546	7.96e-05	0.00150721
Redblood	NonBrain	olfactory_bulb	Tissue_Fantom60	Brain		DEL	0.0160894	0.0134221	0.230635	0.481187
StandingHeight	NonBrain	olfactory_bulb	Tissue_Fantom60	Brain		DEL	-0.0874399	0.010868	8.6e-16	1.79e-13
TDI	Brain	olfactory_bulb	Tissue_Fantom60	Brain		DEL	0.0800078	0.0151928	1.39e-07	6.94e-06
Triglycerides	NonBrain	olfactory_bulb	Tissue_Fantom60	Brain		DEL	0.0364544	0.015448	0.0182843	0.0951659
EA	Brain	olfactory_bulb	Tissue_Fantom60	Brain		DEL	-0.0638281	0.0153258	3.12e-05	0.000699752
FI	Brain	olfactory_bulb	Tissue_Fantom60	Brain		DEL	-0.0324665	0.0208503	0.119443	0.32546
HeartRate	NonBrain	olfactory_bulb	Tissue_Fantom60	Brain		DEL	0.040097	0.0161299	0.0129238	0.0753225
MET	NonBrain	olfactory_bulb	Tissue_Fantom60	Brain		DEL	-0.0380964	0.0189561	0.0444615	0.170603
SexPartners	NonBrain	olfactory_bulb	Tissue_Fantom60	Brain		DEL	-0.0138927	0.0168101	0.40855	0.659485
SymbolDigit	Brain	olfactory_bulb	Tissue_Fantom60	Brain		DEL	0.0131018	0.0273186	0.631519	0.815631
TrailMaking1	Brain	olfactory_bulb	Tissue_Fantom60	Brain		DEL	-0.0169125	0.0317436	0.594184	0.794466
TrailMaking2	Brain	olfactory_bulb	Tissue_Fantom60	Brain		DEL	0.0241073	0.0306757	0.431941	0.678916
VSWM1	Brain	olfactory_bulb	Tissue_Fantom60	Brain		DEL	0.038161	0.0160272	0.0172657	0.0916066
VSWM2	Brain	olfactory_bulb	Tissue_Fantom60	Brain		DEL	0.0278782	0.0152819	0.0681119	0.226904
Menarche	NonBrain	olfactory_bulb	Tissue_Fantom60	Brain		DEL	-0.082397	0.0229382	0.000328049	0.00479024
Menopause	NonBrain	olfactory_bulb	Tissue_Fantom60	Brain		DEL	-0.0329262	0.031327	0.293238	0.54972
Depression	Brain	olfactory_bulb	Tissue_Fantom60	Brain		DEL	-0.00104112	0.0036212	0.773725	0.894925
GP	Brain	olfactory_bulb	Tissue_Fantom60	Brain		DEL	-0.00293583	0.00739149	0.691227	0.849786
MoodSwings	Brain	olfactory_bulb	Tissue_Fantom60	Brain		DEL	0.0320618	0.0327158	0.326488	0.583192
RiskTaking	Brain	olfactory_bulb	Tissue_Fantom60	Brain		DEL	-0.0570187	0.0392294	0.143264	0.362374
Loneliness	Brain	olfactory_bulb	Tissue_Fantom60	Brain		DEL	0.0677405	0.037065	0.0690916	0.229268
Irritability	Brain	olfactory_bulb	Tissue_Fantom60	Brain		DEL	0.0288082	0.0357681	0.421306	0.670362
Miserableness	Brain	olfactory_bulb	Tissue_Fantom60	Brain		DEL	-0.013458	0.0325669	0.679185	0.84304
Hypertention	NonBrain	olfactory_bulb	Tissue_Fantom60	Brain		DEL	0.0870075	0.0357091	0.0154362	0.0850397
GuiltyFeelings	Brain	olfactory_bulb	Tissue_Fantom60	Brain		DEL	0.0599748	0.0354474	0.0920305	0.275793
MoodAnxiety	Brain	olfactory_bulb	Tissue_Fantom60	Brain		DEL	0.02171	0.0166781	0.193017	0.433838
Albumin	NonBrain	hippocampus	Tissue_Fantom60	Brain		DEL	-0.0742069	0.0173665	1.93e-05	0.00047245
BirthWeight	NonBrain	hippocampus	Tissue_Fantom60	Brain		DEL	-0.0302115	0.0226551	0.182356	0.418645
BMD	NonBrain	hippocampus	Tissue_Fantom60	Brain		DEL	-0.0293454	0.0213639	0.169569	0.402309
BMI	NonBrain	hippocampus	Tissue_Fantom60	Brain		DEL	0.0704074	0.0164125	1.79e-05	0.000444539
Calcium	NonBrain	hippocampus	Tissue_Fantom60	Brain		DEL	-0.0463709	0.0176131	0.00847003	0.0551447
Cholesterol	NonBrain	hippocampus	Tissue_Fantom60	Brain		DEL	-0.0399902	0.0166261	0.0161612	0.0877272
FEV1	NonBrain	hippocampus	Tissue_Fantom60	Brain		DEL	-0.0991307	0.0125802	3.28e-15	6.15e-13
FVC	NonBrain	hippocampus	Tissue_Fantom60	Brain		DEL	-0.106579	0.0121951	2.35e-18	7.4e-16
Gamma	NonBrain	hippocampus	Tissue_Fantom60	Brain		DEL	0.0508959	0.0157866	0.00126428	0.013532
Glucose	NonBrain	hippocampus	Tissue_Fantom60	Brain		DEL	0.0153375	0.017502	0.380852	0.6337
HbA1c	NonBrain	hippocampus	Tissue_Fantom60	Brain		DEL	0.0650059	0.015991	4.8e-05	0.000997358
HDL	NonBrain	hippocampus	Tissue_Fantom60	Brain		DEL	-0.0477223	0.016026	0.00290337	0.0249689
IGF1	NonBrain	hippocampus	Tissue_Fantom60	Brain		DEL	-0.05706	0.0163014	0.000464763	0.0063479
LDL	NonBrain	hippocampus	Tissue_Fantom60	Brain		DEL	-0.0345109	0.0168585	0.0406496	0.161811
Neuroticism	Brain	hippocampus	Tissue_Fantom60	Brain		DEL	0.0280045	0.0184694	0.129455	0.340338
Platelet	NonBrain	hippocampus	Tissue_Fantom60	Brain		DEL	0.0355888	0.0162503	0.028522	0.127983
Reaction	Brain	hippocampus	Tissue_Fantom60	Brain		DEL	0.0520424	0.0155711	0.000831137	0.00980397
Redblood	NonBrain	hippocampus	Tissue_Fantom60	Brain		DEL	0.0142574	0.0142728	0.317833	0.575093
StandingHeight	NonBrain	hippocampus	Tissue_Fantom60	Brain		DEL	-0.0674459	0.0115521	5.27e-09	3.5e-07
TDI	Brain	hippocampus	Tissue_Fantom60	Brain		DEL	0.0657591	0.0161446	4.64e-05	0.000971998
Triglycerides	NonBrain	hippocampus	Tissue_Fantom60	Brain		DEL	0.0236936	0.0164109	0.148803	0.371807
EA	Brain	hippocampus	Tissue_Fantom60	Brain		DEL	-0.068613	0.0163021	2.57e-05	0.000593357
FI	Brain	hippocampus	Tissue_Fantom60	Brain		DEL	-0.0291092	0.0215372	0.176513	0.410268
HeartRate	NonBrain	hippocampus	Tissue_Fantom60	Brain		DEL	0.026561	0.0171166	0.120718	0.327252
MET	NonBrain	hippocampus	Tissue_Fantom60	Brain		DEL	-0.0483107	0.0196973	0.0141811	0.0804944
SexPartners	NonBrain	hippocampus	Tissue_Fantom60	Brain		DEL	-0.00645481	0.0175184	0.712532	0.862149
SymbolDigit	Brain	hippocampus	Tissue_Fantom60	Brain		DEL	-0.0369139	0.0274321	0.178418	0.412874
TrailMaking1	Brain	hippocampus	Tissue_Fantom60	Brain		DEL	0.0104871	0.0314704	0.738956	0.878315
TrailMaking2	Brain	hippocampus	Tissue_Fantom60	Brain		DEL	0.0213132	0.0304016	0.48327	0.720731
VSWM1	Brain	hippocampus	Tissue_Fantom60	Brain		DEL	0.0520487	0.0169464	0.00213084	0.0196996
VSWM2	Brain	hippocampus	Tissue_Fantom60	Brain		DEL	0.0266395	0.0161485	0.099013	0.289384
Menarche	NonBrain	hippocampus	Tissue_Fantom60	Brain		DEL	-0.0235735	0.0242494	0.330988	0.588176
Menopause	NonBrain	hippocampus	Tissue_Fantom60	Brain		DEL	-0.0576472	0.0331564	0.0820993	0.256454
Depression	Brain	hippocampus	Tissue_Fantom60	Brain		DEL	0.00172895	0.00384995	0.653371	0.828968
GP	Brain	hippocampus	Tissue_Fantom60	Brain		DEL	-0.00752132	0.0078251	0.336463	0.593743
MoodSwings	Brain	hippocampus	Tissue_Fantom60	Brain		DEL	0.0773673	0.0345112	0.0248084	0.11734
RiskTaking	Brain	hippocampus	Tissue_Fantom60	Brain		DEL	-0.0177158	0.0404114	0.660489	0.832722
Loneliness	Brain	hippocampus	Tissue_Fantom60	Brain		DEL	0.0555168	0.0403665	0.170868	0.404138
Irritability	Brain	hippocampus	Tissue_Fantom60	Brain		DEL	0.0342876	0.0378972	0.366525	0.620579
Miserableness	Brain	hippocampus	Tissue_Fantom60	Brain		DEL	0.0326482	0.0344452	0.343159	0.600193
Hypertention	NonBrain	hippocampus	Tissue_Fantom60	Brain		DEL	0.02078	0.0385922	0.59055	0.793009
GuiltyFeelings	Brain	hippocampus	Tissue_Fantom60	Brain		DEL	0.0415888	0.0376263	0.270266	0.524808
MoodAnxiety	Brain	hippocampus	Tissue_Fantom60	Brain		DEL	0.038591	0.0176036	0.028364	0.127581
Albumin	NonBrain	putamen	Tissue_Fantom60	Brain		DEL	-0.0395103	0.0122077	0.00121017	0.0130711
BirthWeight	NonBrain	putamen	Tissue_Fantom60	Brain		DEL	0.0142224	0.0155772	0.36123	0.615488
BMD	NonBrain	putamen	Tissue_Fantom60	Brain		DEL	0.0161869	0.0149582	0.279192	0.534464
BMI	NonBrain	putamen	Tissue_Fantom60	Brain		DEL	0.0542369	0.0115294	2.55e-06	8.85e-05
Calcium	NonBrain	putamen	Tissue_Fantom60	Brain		DEL	-0.00924315	0.0123815	0.455348	0.698481
Cholesterol	NonBrain	putamen	Tissue_Fantom60	Brain		DEL	-0.0276405	0.0116944	0.0181006	0.0944756
FEV1	NonBrain	putamen	Tissue_Fantom60	Brain		DEL	-0.0430237	0.0088737	1.24e-06	4.78e-05
FVC	NonBrain	putamen	Tissue_Fantom60	Brain		DEL	-0.0504606	0.00860266	4.48e-09	3.04e-07
Gamma	NonBrain	putamen	Tissue_Fantom60	Brain		DEL	0.0294073	0.0111182	0.00816976	0.053686
Glucose	NonBrain	putamen	Tissue_Fantom60	Brain		DEL	-0.00316545	0.0123111	0.797085	0.906751
HbA1c	NonBrain	putamen	Tissue_Fantom60	Brain		DEL	0.0351672	0.0112817	0.00182602	0.0176793
HDL	NonBrain	putamen	Tissue_Fantom60	Brain		DEL	-0.0219493	0.0112636	0.0513325	0.189024
IGF1	NonBrain	putamen	Tissue_Fantom60	Brain		DEL	-0.0413681	0.011474	0.000311745	0.00459879
LDL	NonBrain	putamen	Tissue_Fantom60	Brain		DEL	-0.0257328	0.0118665	0.0301193	0.132805
Neuroticism	Brain	putamen	Tissue_Fantom60	Brain		DEL	0.0209142	0.0129723	0.106915	0.303812
Platelet	NonBrain	putamen	Tissue_Fantom60	Brain		DEL	0.0181598	0.0114167	0.111693	0.312377
Reaction	Brain	putamen	Tissue_Fantom60	Brain		DEL	0.0126545	0.0109112	0.246141	0.498279
Redblood	NonBrain	putamen	Tissue_Fantom60	Brain		DEL	0.015572	0.0100267	0.120413	0.326978
StandingHeight	NonBrain	putamen	Tissue_Fantom60	Brain		DEL	-0.0237469	0.00811933	0.0034477	0.0284589
TDI	Brain	putamen	Tissue_Fantom60	Brain		DEL	0.0209079	0.0113515	0.0654952	0.220868
Triglycerides	NonBrain	putamen	Tissue_Fantom60	Brain		DEL	0.0177561	0.0115413	0.12393	0.33258
EA	Brain	putamen	Tissue_Fantom60	Brain		DEL	-0.0298545	0.0114478	0.00911095	0.058266
FI	Brain	putamen	Tissue_Fantom60	Brain		DEL	0.0355797	0.0150436	0.0180253	0.0942452
HeartRate	NonBrain	putamen	Tissue_Fantom60	Brain		DEL	0.00138343	0.0120085	0.908283	0.960421
MET	NonBrain	putamen	Tissue_Fantom60	Brain		DEL	0.0076079	0.013589	0.575578	0.784768
SexPartners	NonBrain	putamen	Tissue_Fantom60	Brain		DEL	0.00659893	0.0122158	0.589061	0.792409
SymbolDigit	Brain	putamen	Tissue_Fantom60	Brain		DEL	0.00685162	0.0191212	0.7201	0.865922
TrailMaking1	Brain	putamen	Tissue_Fantom60	Brain		DEL	-0.00586471	0.0219398	0.789232	0.902849
TrailMaking2	Brain	putamen	Tissue_Fantom60	Brain		DEL	-0.0035551	0.021246	0.86711	0.941904
VSWM1	Brain	putamen	Tissue_Fantom60	Brain		DEL	0.0214003	0.011934	0.0729375	0.237272
VSWM2	Brain	putamen	Tissue_Fantom60	Brain		DEL	-0.00180389	0.0113418	0.873631	0.945199
Menarche	NonBrain	putamen	Tissue_Fantom60	Brain		DEL	0.0043256	0.0164303	0.792342	0.903928
Menopause	NonBrain	putamen	Tissue_Fantom60	Brain		DEL	-0.0308829	0.0218638	0.157802	0.385657
Depression	Brain	putamen	Tissue_Fantom60	Brain		DEL	-0.00414395	0.00270648	0.12574	0.335593
GP	Brain	putamen	Tissue_Fantom60	Brain		DEL	0.00484204	0.00550117	0.378761	0.631913
MoodSwings	Brain	putamen	Tissue_Fantom60	Brain		DEL	0.052248	0.0241216	0.0302008	0.132995
RiskTaking	Brain	putamen	Tissue_Fantom60	Brain		DEL	0.0702927	0.0278517	0.0120449	0.0713848
Loneliness	Brain	putamen	Tissue_Fantom60	Brain		DEL	0.0640599	0.028546	0.0256004	0.119798
Irritability	Brain	putamen	Tissue_Fantom60	Brain		DEL	0.0680537	0.0264771	0.0104763	0.0644613
Miserableness	Brain	putamen	Tissue_Fantom60	Brain		DEL	0.036225	0.0241601	0.133748	0.347088
Hypertention	NonBrain	putamen	Tissue_Fantom60	Brain		DEL	0.0348001	0.0271437	0.20084	0.444867
GuiltyFeelings	Brain	putamen	Tissue_Fantom60	Brain		DEL	0.0262668	0.0264727	0.32188	0.578959
MoodAnxiety	Brain	putamen	Tissue_Fantom60	Brain		DEL	0.0186836	0.0123747	0.13109	0.342942
Albumin	NonBrain	paracentral_gyrus	Tissue_Fantom60	Brain		DEL	-0.025751	0.0133944	0.0545415	0.196715
BirthWeight	NonBrain	paracentral_gyrus	Tissue_Fantom60	Brain		DEL	-0.0432858	0.0176611	0.0142499	0.0807172
BMD	NonBrain	paracentral_gyrus	Tissue_Fantom60	Brain		DEL	0.0366394	0.0169071	0.0302277	0.133064
BMI	NonBrain	paracentral_gyrus	Tissue_Fantom60	Brain		DEL	0.098412	0.0126296	6.6e-15	1.18e-12
Calcium	NonBrain	paracentral_gyrus	Tissue_Fantom60	Brain		DEL	-0.0162813	0.0135812	0.230602	0.481187
Cholesterol	NonBrain	paracentral_gyrus	Tissue_Fantom60	Brain		DEL	-0.0422858	0.0128039	0.000958066	0.0109382
FEV1	NonBrain	paracentral_gyrus	Tissue_Fantom60	Brain		DEL	-0.0784402	0.00968218	5.44e-16	1.18e-13
FVC	NonBrain	paracentral_gyrus	Tissue_Fantom60	Brain		DEL	-0.0893662	0.00938575	1.72e-21	8.46e-19
Gamma	NonBrain	paracentral_gyrus	Tissue_Fantom60	Brain		DEL	0.0426535	0.0121814	0.000462632	0.00633048
Glucose	NonBrain	paracentral_gyrus	Tissue_Fantom60	Brain		DEL	0.0246712	0.0135515	0.0686763	0.228181
HbA1c	NonBrain	paracentral_gyrus	Tissue_Fantom60	Brain		DEL	0.0499318	0.0124217	5.83e-05	0.00117083
HDL	NonBrain	paracentral_gyrus	Tissue_Fantom60	Brain		DEL	-0.0689108	0.0123594	2.47e-08	1.44e-06
IGF1	NonBrain	paracentral_gyrus	Tissue_Fantom60	Brain		DEL	-0.0346032	0.012553	0.0058412	0.0424794
LDL	NonBrain	paracentral_gyrus	Tissue_Fantom60	Brain		DEL	-0.0316173	0.0129929	0.0149571	0.083325
Neuroticism	Brain	paracentral_gyrus	Tissue_Fantom60	Brain		DEL	0.0542266	0.0144811	0.000180672	0.00293092
Platelet	NonBrain	paracentral_gyrus	Tissue_Fantom60	Brain		DEL	0.0398067	0.0125053	0.00145677	0.0149851
Reaction	Brain	paracentral_gyrus	Tissue_Fantom60	Brain		DEL	0.100673	0.0119776	4.29e-17	1.13e-14
Redblood	NonBrain	paracentral_gyrus	Tissue_Fantom60	Brain		DEL	0.0293257	0.0109835	0.00758584	0.0508197
StandingHeight	NonBrain	paracentral_gyrus	Tissue_Fantom60	Brain		DEL	-0.0858227	0.00886697	3.73e-22	2.2e-19
TDI	Brain	paracentral_gyrus	Tissue_Fantom60	Brain		DEL	0.0920407	0.0123939	1.12e-13	1.69e-11
Triglycerides	NonBrain	paracentral_gyrus	Tissue_Fantom60	Brain		DEL	0.0404473	0.0126394	0.00137389	0.0143363
EA	Brain	paracentral_gyrus	Tissue_Fantom60	Brain		DEL	-0.0972427	0.0125147	7.85e-15	1.38e-12
FI	Brain	paracentral_gyrus	Tissue_Fantom60	Brain		DEL	-0.0981421	0.0168438	5.66e-09	3.72e-07
HeartRate	NonBrain	paracentral_gyrus	Tissue_Fantom60	Brain		DEL	0.0428332	0.0131739	0.0011486	0.0125946
MET	NonBrain	paracentral_gyrus	Tissue_Fantom60	Brain		DEL	0.0277017	0.0153214	0.0706022	0.232439
SexPartners	NonBrain	paracentral_gyrus	Tissue_Fantom60	Brain		DEL	-0.0478142	0.0136966	0.000481372	0.00649084
SymbolDigit	Brain	paracentral_gyrus	Tissue_Fantom60	Brain		DEL	-0.0755928	0.0223529	0.000720353	0.00876992
TrailMaking1	Brain	paracentral_gyrus	Tissue_Fantom60	Brain		DEL	0.0307552	0.0255832	0.229301	0.479749
TrailMaking2	Brain	paracentral_gyrus	Tissue_Fantom60	Brain		DEL	0.0840519	0.0249997	0.000773689	0.0092743
VSWM1	Brain	paracentral_gyrus	Tissue_Fantom60	Brain		DEL	0.0381645	0.0131074	0.003595	0.0292665
VSWM2	Brain	paracentral_gyrus	Tissue_Fantom60	Brain		DEL	0.0586118	0.0125087	2.79e-06	9.51e-05
Menarche	NonBrain	paracentral_gyrus	Tissue_Fantom60	Brain		DEL	-0.0426433	0.018581	0.0217343	0.106937
Menopause	NonBrain	paracentral_gyrus	Tissue_Fantom60	Brain		DEL	-0.0350675	0.0255409	0.169756	0.402538
Depression	Brain	paracentral_gyrus	Tissue_Fantom60	Brain		DEL	0.00174103	0.00295531	0.555781	0.771645
GP	Brain	paracentral_gyrus	Tissue_Fantom60	Brain		DEL	-0.00386648	0.00602992	0.521383	0.749973
MoodSwings	Brain	paracentral_gyrus	Tissue_Fantom60	Brain		DEL	0.0951719	0.0267958	0.00036336	0.00518305
RiskTaking	Brain	paracentral_gyrus	Tissue_Fantom60	Brain		DEL	-0.0903103	0.0322442	0.00460412	0.0353788
Loneliness	Brain	paracentral_gyrus	Tissue_Fantom60	Brain		DEL	0.129247	0.0300566	2.05e-05	0.000495813
Irritability	Brain	paracentral_gyrus	Tissue_Fantom60	Brain		DEL	0.019902	0.0292874	0.49728	0.731916
Miserableness	Brain	paracentral_gyrus	Tissue_Fantom60	Brain		DEL	0.0833156	0.0266431	0.00173227	0.0169581
Hypertention	NonBrain	paracentral_gyrus	Tissue_Fantom60	Brain		DEL	0.012554	0.0297464	0.67318	0.840169
GuiltyFeelings	Brain	paracentral_gyrus	Tissue_Fantom60	Brain		DEL	0.0442462	0.0289728	0.127926	0.337788
MoodAnxiety	Brain	paracentral_gyrus	Tissue_Fantom60	Brain		DEL	0.0651496	0.0137018	1.99e-06	7.06e-05
Albumin	NonBrain	temporal_cortex	Tissue_Fantom60	Brain		DEL	-0.0502751	0.0129506	0.00010359	0.00185959
BirthWeight	NonBrain	temporal_cortex	Tissue_Fantom60	Brain		DEL	-0.0357579	0.0171859	0.0374667	0.153691
BMD	NonBrain	temporal_cortex	Tissue_Fantom60	Brain		DEL	-0.0148543	0.0169119	0.379764	0.632906
BMI	NonBrain	temporal_cortex	Tissue_Fantom60	Brain		DEL	0.105487	0.0122421	6.91e-18	2.05e-15
Calcium	NonBrain	temporal_cortex	Tissue_Fantom60	Brain		DEL	-0.0362803	0.0131291	0.00572162	0.0418386
Cholesterol	NonBrain	temporal_cortex	Tissue_Fantom60	Brain		DEL	-0.0314655	0.0123672	0.0109508	0.0665777
FEV1	NonBrain	temporal_cortex	Tissue_Fantom60	Brain		DEL	-0.0996151	0.00939062	2.76e-26	2.72e-23
FVC	NonBrain	temporal_cortex	Tissue_Fantom60	Brain		DEL	-0.102121	0.00910315	3.35e-29	8.26e-26
Gamma	NonBrain	temporal_cortex	Tissue_Fantom60	Brain		DEL	0.0738596	0.0117762	3.57e-10	2.95e-08
Glucose	NonBrain	temporal_cortex	Tissue_Fantom60	Brain		DEL	0.00706523	0.0131594	0.591341	0.79322
HbA1c	NonBrain	temporal_cortex	Tissue_Fantom60	Brain		DEL	0.0826647	0.011981	5.22e-12	6.03e-10
HDL	NonBrain	temporal_cortex	Tissue_Fantom60	Brain		DEL	-0.0490623	0.0119489	4.03e-05	0.000865433
IGF1	NonBrain	temporal_cortex	Tissue_Fantom60	Brain		DEL	-0.068479	0.0121184	1.6e-08	9.65e-07
LDL	NonBrain	temporal_cortex	Tissue_Fantom60	Brain		DEL	-0.0251132	0.0125491	0.0453712	0.173072
Neuroticism	Brain	temporal_cortex	Tissue_Fantom60	Brain		DEL	0.0201761	0.0144492	0.162612	0.392873
Platelet	NonBrain	temporal_cortex	Tissue_Fantom60	Brain		DEL	0.0431174	0.0121272	0.00037741	0.00536031
Reaction	Brain	temporal_cortex	Tissue_Fantom60	Brain		DEL	0.0518153	0.0116279	8.35e-06	0.000239392
Redblood	NonBrain	temporal_cortex	Tissue_Fantom60	Brain		DEL	0.0115246	0.0106521	0.279294	0.534467
StandingHeight	NonBrain	temporal_cortex	Tissue_Fantom60	Brain		DEL	-0.0716314	0.00856485	6.11e-17	1.59e-14
TDI	Brain	temporal_cortex	Tissue_Fantom60	Brain		DEL	0.0779462	0.0119798	7.7e-11	7.08e-09
Triglycerides	NonBrain	temporal_cortex	Tissue_Fantom60	Brain		DEL	0.0394874	0.0122164	0.00122793	0.0132099
EA	Brain	temporal_cortex	Tissue_Fantom60	Brain		DEL	-0.0572271	0.0121127	2.31e-06	8.09e-05
FI	Brain	temporal_cortex	Tissue_Fantom60	Brain		DEL	-0.0269301	0.0171121	0.115547	0.318577
HeartRate	NonBrain	temporal_cortex	Tissue_Fantom60	Brain		DEL	0.044202	0.0127903	0.000548489	0.00716086
MET	NonBrain	temporal_cortex	Tissue_Fantom60	Brain		DEL	-0.0203636	0.0153943	0.185903	0.423645
SexPartners	NonBrain	temporal_cortex	Tissue_Fantom60	Brain		DEL	-0.0251598	0.0136543	0.0653829	0.220658
SymbolDigit	Brain	temporal_cortex	Tissue_Fantom60	Brain		DEL	-0.0266142	0.0235856	0.259148	0.513368
TrailMaking1	Brain	temporal_cortex	Tissue_Fantom60	Brain		DEL	0.00993376	0.0271786	0.714739	0.863408
TrailMaking2	Brain	temporal_cortex	Tissue_Fantom60	Brain		DEL	0.0297844	0.0262907	0.257265	0.510732
VSWM1	Brain	temporal_cortex	Tissue_Fantom60	Brain		DEL	0.0439927	0.0127889	0.00058195	0.00748682
VSWM2	Brain	temporal_cortex	Tissue_Fantom60	Brain		DEL	0.0215654	0.0122058	0.0772601	0.246688
Menarche	NonBrain	temporal_cortex	Tissue_Fantom60	Brain		DEL	-0.0505941	0.0182596	0.00559187	0.0411517
Menopause	NonBrain	temporal_cortex	Tissue_Fantom60	Brain		DEL	-0.0303645	0.0270089	0.260914	0.515278
Depression	Brain	temporal_cortex	Tissue_Fantom60	Brain		DEL	0.00286374	0.00285506	0.315842	0.572753
GP	Brain	temporal_cortex	Tissue_Fantom60	Brain		DEL	-0.00379574	0.00584613	0.516162	0.745831
MoodSwings	Brain	temporal_cortex	Tissue_Fantom60	Brain		DEL	0.0569241	0.0263077	0.0295843	0.1311
RiskTaking	Brain	temporal_cortex	Tissue_Fantom60	Brain		DEL	-0.00351607	0.0308798	0.908876	0.960773
Loneliness	Brain	temporal_cortex	Tissue_Fantom60	Brain		DEL	0.0710901	0.0284957	0.0134445	0.0775023
Irritability	Brain	temporal_cortex	Tissue_Fantom60	Brain		DEL	0.025012	0.0283008	0.37807	0.631744
Miserableness	Brain	temporal_cortex	Tissue_Fantom60	Brain		DEL	0.0216141	0.0258725	0.402774	0.654852
Hypertention	NonBrain	temporal_cortex	Tissue_Fantom60	Brain		DEL	0.0286921	0.0285081	0.316114	0.572824
GuiltyFeelings	Brain	temporal_cortex	Tissue_Fantom60	Brain		DEL	0.0278452	0.0281834	0.324824	0.581958
MoodAnxiety	Brain	temporal_cortex	Tissue_Fantom60	Brain		DEL	0.0229808	0.0132006	0.0817049	0.25573
Albumin	NonBrain	tongue	Tissue_Fantom60	NonBrain		DEL	-0.0302131	0.0117939	0.0104151	0.0642497
BirthWeight	NonBrain	tongue	Tissue_Fantom60	NonBrain		DEL	0.020355	0.0149317	0.172817	0.40657
BMD	NonBrain	tongue	Tissue_Fantom60	NonBrain		DEL	0.00645802	0.0144203	0.654268	0.82953
BMI	NonBrain	tongue	Tissue_Fantom60	NonBrain		DEL	0.0252089	0.0111793	0.0241357	0.114944
Calcium	NonBrain	tongue	Tissue_Fantom60	NonBrain		DEL	-0.0259551	0.0119607	0.0300048	0.132408
Cholesterol	NonBrain	tongue	Tissue_Fantom60	NonBrain		DEL	-0.0291779	0.0113481	0.0101361	0.06305
FEV1	NonBrain	tongue	Tissue_Fantom60	NonBrain		DEL	-0.0491193	0.00856405	9.73e-09	6.1e-07
FVC	NonBrain	tongue	Tissue_Fantom60	NonBrain		DEL	-0.0536686	0.00830246	1.02e-10	9.2e-09
Gamma	NonBrain	tongue	Tissue_Fantom60	NonBrain		DEL	0.0136454	0.0107721	0.20525	0.451422
Glucose	NonBrain	tongue	Tissue_Fantom60	NonBrain		DEL	-0.00378351	0.0118722	0.749964	0.88366
HbA1c	NonBrain	tongue	Tissue_Fantom60	NonBrain		DEL	0.022383	0.0109492	0.0409288	0.162484
HDL	NonBrain	tongue	Tissue_Fantom60	NonBrain		DEL	-0.0112475	0.0108795	0.301216	0.557716
IGF1	NonBrain	tongue	Tissue_Fantom60	NonBrain		DEL	-0.0241577	0.0111291	0.0299562	0.132312
LDL	NonBrain	tongue	Tissue_Fantom60	NonBrain		DEL	-0.0340108	0.0115077	0.00312191	0.0264941
Neuroticism	Brain	tongue	Tissue_Fantom60	NonBrain		DEL	0.0278615	0.0123507	0.0240796	0.114787
Platelet	NonBrain	tongue	Tissue_Fantom60	NonBrain		DEL	-0.00552674	0.0110398	0.616639	0.806579
Reaction	Brain	tongue	Tissue_Fantom60	NonBrain		DEL	-0.00171072	0.0106441	0.872313	0.944394
Redblood	NonBrain	tongue	Tissue_Fantom60	NonBrain		DEL	0.00509658	0.0096963	0.599152	0.796219
StandingHeight	NonBrain	tongue	Tissue_Fantom60	NonBrain		DEL	-0.0354287	0.00788631	7.04e-06	0.000209202
TDI	Brain	tongue	Tissue_Fantom60	NonBrain		DEL	0.0300877	0.0110209	0.00633261	0.0448461
Triglycerides	NonBrain	tongue	Tissue_Fantom60	NonBrain		DEL	0.00899058	0.0111843	0.42148	0.670451
EA	Brain	tongue	Tissue_Fantom60	NonBrain		DEL	-0.0135828	0.0111226	0.222017	0.47093
FI	Brain	tongue	Tissue_Fantom60	NonBrain		DEL	-0.00783162	0.0140347	0.576831	0.785608
HeartRate	NonBrain	tongue	Tissue_Fantom60	NonBrain		DEL	-0.00518158	0.0116487	0.656448	0.830853
MET	NonBrain	tongue	Tissue_Fantom60	NonBrain		DEL	-0.0110449	0.0130002	0.395551	0.647576
SexPartners	NonBrain	tongue	Tissue_Fantom60	NonBrain		DEL	-0.00773769	0.011711	0.508793	0.740828
SymbolDigit	Brain	tongue	Tissue_Fantom60	NonBrain		DEL	-0.0280042	0.0173207	0.105922	0.302004
TrailMaking1	Brain	tongue	Tissue_Fantom60	NonBrain		DEL	0.0243161	0.0200604	0.225461	0.47548
TrailMaking2	Brain	tongue	Tissue_Fantom60	NonBrain		DEL	-0.00239206	0.0193811	0.901773	0.957368
VSWM1	Brain	tongue	Tissue_Fantom60	NonBrain		DEL	0.00643019	0.0115806	0.578721	0.786458
VSWM2	Brain	tongue	Tissue_Fantom60	NonBrain		DEL	0.00285846	0.01103	0.795518	0.905804
Menarche	NonBrain	tongue	Tissue_Fantom60	NonBrain		DEL	-0.0133283	0.0160927	0.407544	0.658985
Menopause	NonBrain	tongue	Tissue_Fantom60	NonBrain		DEL	0.00651994	0.0210772	0.757067	0.886401
Depression	Brain	tongue	Tissue_Fantom60	NonBrain		DEL	0.00480782	0.0026284	0.0673725	0.225263
GP	Brain	tongue	Tissue_Fantom60	NonBrain		DEL	0.0106665	0.00533289	0.0454856	0.173453
MoodSwings	Brain	tongue	Tissue_Fantom60	NonBrain		DEL	0.0370603	0.0233451	0.111799	0.312557
RiskTaking	Brain	tongue	Tissue_Fantom60	NonBrain		DEL	0.043143	0.0267804	0.108503	0.306359
Loneliness	Brain	tongue	Tissue_Fantom60	NonBrain		DEL	0.0918459	0.0271166	0.000807468	0.00957111
Irritability	Brain	tongue	Tissue_Fantom60	NonBrain		DEL	0.0607498	0.025472	0.0175008	0.0924231
Miserableness	Brain	tongue	Tissue_Fantom60	NonBrain		DEL	0.0364225	0.0233957	0.119178	0.325016
Hypertention	NonBrain	tongue	Tissue_Fantom60	NonBrain		DEL	0.0358052	0.0261123	0.171966	0.40544
GuiltyFeelings	Brain	tongue	Tissue_Fantom60	NonBrain		DEL	0.034752	0.0254497	0.173504	0.407246
MoodAnxiety	Brain	tongue	Tissue_Fantom60	NonBrain		DEL	0.030158	0.011879	0.011125	0.0673374
Albumin	NonBrain	lung	Tissue_Fantom60	NonBrain		DEL	-0.0185058	0.0112487	0.0999377	0.290885
BirthWeight	NonBrain	lung	Tissue_Fantom60	NonBrain		DEL	0.00658629	0.0142284	0.643438	0.824118
BMD	NonBrain	lung	Tissue_Fantom60	NonBrain		DEL	0.0053217	0.0137821	0.6994	0.855002
BMI	NonBrain	lung	Tissue_Fantom60	NonBrain		DEL	0.0096515	0.0105399	0.35982	0.614248
Calcium	NonBrain	lung	Tissue_Fantom60	NonBrain		DEL	-0.0177792	0.0114042	0.118996	0.324915
Cholesterol	NonBrain	lung	Tissue_Fantom60	NonBrain		DEL	-0.0131916	0.0107926	0.221604	0.4705
FEV1	NonBrain	lung	Tissue_Fantom60	NonBrain		DEL	-0.02082	0.00807031	0.00988527	0.0618937
FVC	NonBrain	lung	Tissue_Fantom60	NonBrain		DEL	-0.0197475	0.00782378	0.0116019	0.0695364
Gamma	NonBrain	lung	Tissue_Fantom60	NonBrain		DEL	0.00159644	0.0102519	0.876252	0.946188
Glucose	NonBrain	lung	Tissue_Fantom60	NonBrain		DEL	-0.0149208	0.0113418	0.188323	0.426859
HbA1c	NonBrain	lung	Tissue_Fantom60	NonBrain		DEL	0.00581697	0.0103194	0.572963	0.783038
HDL	NonBrain	lung	Tissue_Fantom60	NonBrain		DEL	0.00159991	0.0103785	0.877487	0.946462
IGF1	NonBrain	lung	Tissue_Fantom60	NonBrain		DEL	-0.0333162	0.0105944	0.00166268	0.0165619
LDL	NonBrain	lung	Tissue_Fantom60	NonBrain		DEL	-0.0163723	0.0109473	0.134769	0.348922
Neuroticism	Brain	lung	Tissue_Fantom60	NonBrain		DEL	-0.00286301	0.0118267	0.808719	0.913199
Platelet	NonBrain	lung	Tissue_Fantom60	NonBrain		DEL	0.0236474	0.0104323	0.0234061	0.11273
Reaction	Brain	lung	Tissue_Fantom60	NonBrain		DEL	0.00334294	0.00996638	0.737307	0.877423
Redblood	NonBrain	lung	Tissue_Fantom60	NonBrain		DEL	-0.00106646	0.00916286	0.907344	0.960167
StandingHeight	NonBrain	lung	Tissue_Fantom60	NonBrain		DEL	-0.00957389	0.00742778	0.197423	0.439536
TDI	Brain	lung	Tissue_Fantom60	NonBrain		DEL	0.0229543	0.0103837	0.0270644	0.123905
Triglycerides	NonBrain	lung	Tissue_Fantom60	NonBrain		DEL	0.00372888	0.0106401	0.725998	0.86979
EA	Brain	lung	Tissue_Fantom60	NonBrain		DEL	-0.00418401	0.0104628	0.689234	0.848394
FI	Brain	lung	Tissue_Fantom60	NonBrain		DEL	0.014842	0.0135319	0.272724	0.527268
HeartRate	NonBrain	lung	Tissue_Fantom60	NonBrain		DEL	-0.00675616	0.0109543	0.537395	0.760555
MET	NonBrain	lung	Tissue_Fantom60	NonBrain		DEL	0.00341938	0.0125838	0.785831	0.901156
SexPartners	NonBrain	lung	Tissue_Fantom60	NonBrain		DEL	-0.0089671	0.0110702	0.417928	0.668107
SymbolDigit	Brain	lung	Tissue_Fantom60	NonBrain		DEL	-0.0023547	0.0174018	0.892364	0.953815
TrailMaking1	Brain	lung	Tissue_Fantom60	NonBrain		DEL	0.0271385	0.0197361	0.169112	0.401913
TrailMaking2	Brain	lung	Tissue_Fantom60	NonBrain		DEL	0.0102331	0.0191052	0.592224	0.79334
VSWM1	Brain	lung	Tissue_Fantom60	NonBrain		DEL	0.0160865	0.0109184	0.140658	0.358193
VSWM2	Brain	lung	Tissue_Fantom60	NonBrain		DEL	0.00141209	0.0103439	0.891414	0.953351
Menarche	NonBrain	lung	Tissue_Fantom60	NonBrain		DEL	-0.00137197	0.0148268	0.926274	0.968848
Menopause	NonBrain	lung	Tissue_Fantom60	NonBrain		DEL	0.0114761	0.019305	0.552202	0.768962
Depression	Brain	lung	Tissue_Fantom60	NonBrain		DEL	-0.00206036	0.00247604	0.405341	0.657351
GP	Brain	lung	Tissue_Fantom60	NonBrain		DEL	-4.82e-05	0.0050253	0.992345	0.996982
MoodSwings	Brain	lung	Tissue_Fantom60	NonBrain		DEL	-0.0143011	0.0220155	0.515737	0.745362
RiskTaking	Brain	lung	Tissue_Fantom60	NonBrain		DEL	0.0192501	0.0257951	0.456275	0.699111
Loneliness	Brain	lung	Tissue_Fantom60	NonBrain		DEL	-0.0241185	0.026757	0.365873	0.62005
Irritability	Brain	lung	Tissue_Fantom60	NonBrain		DEL	0.00740893	0.0245552	0.762917	0.889543
Miserableness	Brain	lung	Tissue_Fantom60	NonBrain		DEL	0.00325209	0.0221384	0.883161	0.949191
Hypertention	NonBrain	lung	Tissue_Fantom60	NonBrain		DEL	0.00523939	0.0248631	0.833091	0.925252
GuiltyFeelings	Brain	lung	Tissue_Fantom60	NonBrain		DEL	-0.00765458	0.024254	0.752067	0.884588
MoodAnxiety	Brain	lung	Tissue_Fantom60	NonBrain		DEL	0.00292863	0.0113541	0.796457	0.906446
Albumin	NonBrain	ovary	Tissue_Fantom60	NonBrain		DEL	-0.0151334	0.0167402	0.365985	0.62005
BirthWeight	NonBrain	ovary	Tissue_Fantom60	NonBrain		DEL	-0.00769215	0.0214075	0.719355	0.865504
BMD	NonBrain	ovary	Tissue_Fantom60	NonBrain		DEL	0.0254297	0.020547	0.215851	0.465027
BMI	NonBrain	ovary	Tissue_Fantom60	NonBrain		DEL	-0.0122783	0.015898	0.439927	0.685521
Calcium	NonBrain	ovary	Tissue_Fantom60	NonBrain		DEL	-0.0281759	0.0169835	0.0971127	0.286097
Cholesterol	NonBrain	ovary	Tissue_Fantom60	NonBrain		DEL	-0.00776626	0.0160575	0.628633	0.814035
FEV1	NonBrain	ovary	Tissue_Fantom60	NonBrain		DEL	-0.0367342	0.0122473	0.00270562	0.0236954
FVC	NonBrain	ovary	Tissue_Fantom60	NonBrain		DEL	-0.0411112	0.0118742	0.000535774	0.00703834
Gamma	NonBrain	ovary	Tissue_Fantom60	NonBrain		DEL	0.0111066	0.0152442	0.46626	0.706289
Glucose	NonBrain	ovary	Tissue_Fantom60	NonBrain		DEL	0.0285741	0.0168417	0.0897669	0.272264
HbA1c	NonBrain	ovary	Tissue_Fantom60	NonBrain		DEL	0.00368263	0.0155085	0.812301	0.914774
HDL	NonBrain	ovary	Tissue_Fantom60	NonBrain		DEL	-0.00695889	0.0154436	0.652277	0.828823
IGF1	NonBrain	ovary	Tissue_Fantom60	NonBrain		DEL	-0.0235399	0.0157593	0.13525	0.349454
LDL	NonBrain	ovary	Tissue_Fantom60	NonBrain		DEL	-0.00573068	0.0162942	0.725063	0.869296
Neuroticism	Brain	ovary	Tissue_Fantom60	NonBrain		DEL	-0.0291955	0.0175742	0.0966596	0.285501
Platelet	NonBrain	ovary	Tissue_Fantom60	NonBrain		DEL	-0.0099825	0.0157134	0.525242	0.752788
Reaction	Brain	ovary	Tissue_Fantom60	NonBrain		DEL	0.00286584	0.0151131	0.849602	0.933471
Redblood	NonBrain	ovary	Tissue_Fantom60	NonBrain		DEL	-0.0316258	0.0138026	0.0219469	0.107679
StandingHeight	NonBrain	ovary	Tissue_Fantom60	NonBrain		DEL	-0.0514729	0.0111994	4.31e-06	0.000137621
TDI	Brain	ovary	Tissue_Fantom60	NonBrain		DEL	0.00616838	0.0156804	0.694038	0.851402
Triglycerides	NonBrain	ovary	Tissue_Fantom60	NonBrain		DEL	0.00539872	0.0158371	0.733187	0.874903
EA	Brain	ovary	Tissue_Fantom60	NonBrain		DEL	0.00845945	0.0157782	0.591857	0.79329
FI	Brain	ovary	Tissue_Fantom60	NonBrain		DEL	0.00673765	0.0211001	0.749485	0.883236
HeartRate	NonBrain	ovary	Tissue_Fantom60	NonBrain		DEL	-0.00682182	0.0166132	0.681346	0.843598
MET	NonBrain	ovary	Tissue_Fantom60	NonBrain		DEL	-0.0193271	0.0186461	0.299958	0.55678
SexPartners	NonBrain	ovary	Tissue_Fantom60	NonBrain		DEL	0.00654885	0.0165464	0.692263	0.85052
SymbolDigit	Brain	ovary	Tissue_Fantom60	NonBrain		DEL	0.0513263	0.0268471	0.0559038	0.200128
TrailMaking1	Brain	ovary	Tissue_Fantom60	NonBrain		DEL	-0.045038	0.0306191	0.141318	0.359184
TrailMaking2	Brain	ovary	Tissue_Fantom60	NonBrain		DEL	-0.048731	0.0301927	0.106529	0.303051
VSWM1	Brain	ovary	Tissue_Fantom60	NonBrain		DEL	0.0262034	0.0164866	0.111975	0.312569
VSWM2	Brain	ovary	Tissue_Fantom60	NonBrain		DEL	-0.00595767	0.0156889	0.70414	0.857228
Menarche	NonBrain	ovary	Tissue_Fantom60	NonBrain		DEL	0.0133673	0.0222584	0.548138	0.766874
Menopause	NonBrain	ovary	Tissue_Fantom60	NonBrain		DEL	-0.0399526	0.0293198	0.172996	0.406764
Depression	Brain	ovary	Tissue_Fantom60	NonBrain		DEL	-0.00984057	0.00373361	0.0083974	0.0548408
GP	Brain	ovary	Tissue_Fantom60	NonBrain		DEL	-0.0141237	0.00758024	0.0624312	0.214663
MoodSwings	Brain	ovary	Tissue_Fantom60	NonBrain		DEL	-0.06676	0.0332693	0.0443332	0.170326
RiskTaking	Brain	ovary	Tissue_Fantom60	NonBrain		DEL	-0.0134788	0.0390746	0.7296	0.872469
Loneliness	Brain	ovary	Tissue_Fantom60	NonBrain		DEL	-0.100474	0.0416277	0.0142157	0.0806593
Irritability	Brain	ovary	Tissue_Fantom60	NonBrain		DEL	0.00790552	0.0367853	0.829863	0.923583
Miserableness	Brain	ovary	Tissue_Fantom60	NonBrain		DEL	-0.0651771	0.0334399	0.0506164	0.187226
Hypertention	NonBrain	ovary	Tissue_Fantom60	NonBrain		DEL	-0.0513406	0.0379293	0.173241	0.407086
GuiltyFeelings	Brain	ovary	Tissue_Fantom60	NonBrain		DEL	-0.015151	0.0368148	0.679988	0.843241
MoodAnxiety	Brain	ovary	Tissue_Fantom60	NonBrain		DEL	-0.056505	0.0170317	0.000907933	0.010508
Albumin	NonBrain	ductus_deferens	Tissue_Fantom60	NonBrain		DEL	0.00732759	0.0145262	0.613954	0.804679
BirthWeight	NonBrain	ductus_deferens	Tissue_Fantom60	NonBrain		DEL	-0.0290388	0.0185626	0.117732	0.322352
BMD	NonBrain	ductus_deferens	Tissue_Fantom60	NonBrain		DEL	0.0077711	0.017606	0.658931	0.83222
BMI	NonBrain	ductus_deferens	Tissue_Fantom60	NonBrain		DEL	-0.00213466	0.0136488	0.875719	0.94589
Calcium	NonBrain	ductus_deferens	Tissue_Fantom60	NonBrain		DEL	-0.00072072	0.0147331	0.960984	0.983865
Cholesterol	NonBrain	ductus_deferens	Tissue_Fantom60	NonBrain		DEL	-0.0170118	0.0138573	0.219583	0.468495
FEV1	NonBrain	ductus_deferens	Tissue_Fantom60	NonBrain		DEL	-0.0284122	0.0105341	0.00699369	0.0479827
FVC	NonBrain	ductus_deferens	Tissue_Fantom60	NonBrain		DEL	-0.0263263	0.010215	0.00996012	0.0622697
Gamma	NonBrain	ductus_deferens	Tissue_Fantom60	NonBrain		DEL	0.012764	0.0131602	0.3321	0.58949
Glucose	NonBrain	ductus_deferens	Tissue_Fantom60	NonBrain		DEL	0.00900116	0.0146037	0.537656	0.760555
HbA1c	NonBrain	ductus_deferens	Tissue_Fantom60	NonBrain		DEL	0.020857	0.0133424	0.118004	0.322705
HDL	NonBrain	ductus_deferens	Tissue_Fantom60	NonBrain		DEL	-0.00995197	0.0134025	0.457758	0.699514
IGF1	NonBrain	ductus_deferens	Tissue_Fantom60	NonBrain		DEL	-0.0156363	0.0135948	0.250076	0.503205
LDL	NonBrain	ductus_deferens	Tissue_Fantom60	NonBrain		DEL	-0.0164872	0.0140473	0.240518	0.491673
Neuroticism	Brain	ductus_deferens	Tissue_Fantom60	NonBrain		DEL	-0.00121894	0.0154192	0.93699	0.973039
Platelet	NonBrain	ductus_deferens	Tissue_Fantom60	NonBrain		DEL	0.0183934	0.0134957	0.172911	0.406693
Reaction	Brain	ductus_deferens	Tissue_Fantom60	NonBrain		DEL	0.0160639	0.0129004	0.213051	0.461234
Redblood	NonBrain	ductus_deferens	Tissue_Fantom60	NonBrain		DEL	-0.0360615	0.0118534	0.00234796	0.0212552
StandingHeight	NonBrain	ductus_deferens	Tissue_Fantom60	NonBrain		DEL	-0.0253383	0.009626	0.00848179	0.0551726
TDI	Brain	ductus_deferens	Tissue_Fantom60	NonBrain		DEL	0.0079936	0.0134497	0.552289	0.768962
Triglycerides	NonBrain	ductus_deferens	Tissue_Fantom60	NonBrain		DEL	-0.00543377	0.0136704	0.691011	0.849654
EA	Brain	ductus_deferens	Tissue_Fantom60	NonBrain		DEL	-0.012517	0.013595	0.357204	0.612043
FI	Brain	ductus_deferens	Tissue_Fantom60	NonBrain		DEL	-0.00114671	0.0177136	0.948384	0.978209
HeartRate	NonBrain	ductus_deferens	Tissue_Fantom60	NonBrain		DEL	0.0665089	0.0141823	2.74e-06	9.38e-05
MET	NonBrain	ductus_deferens	Tissue_Fantom60	NonBrain		DEL	-0.00822534	0.0158838	0.604568	0.799292
SexPartners	NonBrain	ductus_deferens	Tissue_Fantom60	NonBrain		DEL	-0.00290323	0.0142228	0.838256	0.927688
SymbolDigit	Brain	ductus_deferens	Tissue_Fantom60	NonBrain		DEL	0.0184145	0.022774	0.41876	0.668496
TrailMaking1	Brain	ductus_deferens	Tissue_Fantom60	NonBrain		DEL	-0.0244859	0.0258712	0.343919	0.600833
TrailMaking2	Brain	ductus_deferens	Tissue_Fantom60	NonBrain		DEL	-0.00971727	0.0251919	0.699698	0.855125
VSWM1	Brain	ductus_deferens	Tissue_Fantom60	NonBrain		DEL	0.00237959	0.0140709	0.865707	0.941237
VSWM2	Brain	ductus_deferens	Tissue_Fantom60	NonBrain		DEL	0.0168207	0.0133696	0.208346	0.45576
Menarche	NonBrain	ductus_deferens	Tissue_Fantom60	NonBrain		DEL	0.0212179	0.0192951	0.271484	0.525964
Menopause	NonBrain	ductus_deferens	Tissue_Fantom60	NonBrain		DEL	-0.00865435	0.0259685	0.738936	0.878315
Depression	Brain	ductus_deferens	Tissue_Fantom60	NonBrain		DEL	0.00673462	0.00320713	0.0357395	0.148583
GP	Brain	ductus_deferens	Tissue_Fantom60	NonBrain		DEL	0.00386136	0.0065132	0.553281	0.769547
MoodSwings	Brain	ductus_deferens	Tissue_Fantom60	NonBrain		DEL	-0.00236497	0.0283871	0.93355	0.971923
RiskTaking	Brain	ductus_deferens	Tissue_Fantom60	NonBrain		DEL	-0.0375419	0.0338945	0.265427	0.520285
Loneliness	Brain	ductus_deferens	Tissue_Fantom60	NonBrain		DEL	-0.0118047	0.034141	0.72886	0.872132
Irritability	Brain	ductus_deferens	Tissue_Fantom60	NonBrain		DEL	-0.0265526	0.0320786	0.406028	0.658044
Miserableness	Brain	ductus_deferens	Tissue_Fantom60	NonBrain		DEL	0.0135022	0.0284848	0.635353	0.818354
Hypertention	NonBrain	ductus_deferens	Tissue_Fantom60	NonBrain		DEL	0.00170453	0.0322782	0.957731	0.98203
GuiltyFeelings	Brain	ductus_deferens	Tissue_Fantom60	NonBrain		DEL	-0.0445774	0.0318434	0.158992	0.387468
MoodAnxiety	Brain	ductus_deferens	Tissue_Fantom60	NonBrain		DEL	0.00825053	0.0146458	0.573206	0.783251
Albumin	NonBrain	testis	Tissue_Fantom60	NonBrain		DEL	0.00770728	0.012973	0.552445	0.769035
BirthWeight	NonBrain	testis	Tissue_Fantom60	NonBrain		DEL	0.0140261	0.0164332	0.393371	0.64538
BMD	NonBrain	testis	Tissue_Fantom60	NonBrain		DEL	-0.0139999	0.0153507	0.36177	0.616207
BMI	NonBrain	testis	Tissue_Fantom60	NonBrain		DEL	-0.00372311	0.0122168	0.760553	0.887732
Calcium	NonBrain	testis	Tissue_Fantom60	NonBrain		DEL	0.000553402	0.0131547	0.966444	0.986083
Cholesterol	NonBrain	testis	Tissue_Fantom60	NonBrain		DEL	-0.0125317	0.0124015	0.312255	0.569434
FEV1	NonBrain	testis	Tissue_Fantom60	NonBrain		DEL	-0.00627174	0.0094084	0.505021	0.737513
FVC	NonBrain	testis	Tissue_Fantom60	NonBrain		DEL	0.00293635	0.00912334	0.747567	0.882527
Gamma	NonBrain	testis	Tissue_Fantom60	NonBrain		DEL	-0.00727033	0.0117755	0.536964	0.760531
Glucose	NonBrain	testis	Tissue_Fantom60	NonBrain		DEL	-0.00228635	0.0130571	0.860998	0.939016
HbA1c	NonBrain	testis	Tissue_Fantom60	NonBrain		DEL	0.0109407	0.0119171	0.358582	0.613266
HDL	NonBrain	testis	Tissue_Fantom60	NonBrain		DEL	-0.0123157	0.0119726	0.303644	0.560317
IGF1	NonBrain	testis	Tissue_Fantom60	NonBrain		DEL	0.0150195	0.0121596	0.216756	0.466025
LDL	NonBrain	testis	Tissue_Fantom60	NonBrain		DEL	-0.00624538	0.0125751	0.619438	0.808624
Neuroticism	Brain	testis	Tissue_Fantom60	NonBrain		DEL	0.0153843	0.0134809	0.253789	0.507474
Platelet	NonBrain	testis	Tissue_Fantom60	NonBrain		DEL	-0.0228315	0.0120937	0.059042	0.20725
Reaction	Brain	testis	Tissue_Fantom60	NonBrain		DEL	-0.00192011	0.0115575	0.86805	0.942261
Redblood	NonBrain	testis	Tissue_Fantom60	NonBrain		DEL	-0.00329557	0.0106221	0.756366	0.886261
StandingHeight	NonBrain	testis	Tissue_Fantom60	NonBrain		DEL	0.00616808	0.00862415	0.47448	0.713698
TDI	Brain	testis	Tissue_Fantom60	NonBrain		DEL	-0.00477587	0.0120601	0.692101	0.85052
Triglycerides	NonBrain	testis	Tissue_Fantom60	NonBrain		DEL	-0.0195728	0.012221	0.10925	0.30752
EA	Brain	testis	Tissue_Fantom60	NonBrain		DEL	0.00641959	0.0121396	0.596933	0.795649
FI	Brain	testis	Tissue_Fantom60	NonBrain		DEL	0.00950285	0.0156142	0.542788	0.763495
HeartRate	NonBrain	testis	Tissue_Fantom60	NonBrain		DEL	0.0186945	0.0126967	0.140914	0.358499
MET	NonBrain	testis	Tissue_Fantom60	NonBrain		DEL	-0.00663772	0.0142754	0.641949	0.823342
SexPartners	NonBrain	testis	Tissue_Fantom60	NonBrain		DEL	0.0175917	0.0127469	0.167564	0.400099
SymbolDigit	Brain	testis	Tissue_Fantom60	NonBrain		DEL	0.0420132	0.0197044	0.0329942	0.140979
TrailMaking1	Brain	testis	Tissue_Fantom60	NonBrain		DEL	-0.0289092	0.022382	0.196488	0.438467
TrailMaking2	Brain	testis	Tissue_Fantom60	NonBrain		DEL	-0.0373269	0.0216908	0.0852774	0.26318
VSWM1	Brain	testis	Tissue_Fantom60	NonBrain		DEL	-0.00369752	0.0126152	0.769447	0.892586
VSWM2	Brain	testis	Tissue_Fantom60	NonBrain		DEL	-0.00877375	0.0119755	0.463779	0.704286
Menarche	NonBrain	testis	Tissue_Fantom60	NonBrain		DEL	0.00475314	0.0175508	0.786528	0.901746
Menopause	NonBrain	testis	Tissue_Fantom60	NonBrain		DEL	-0.0088471	0.0227578	0.697462	0.853691
Depression	Brain	testis	Tissue_Fantom60	NonBrain		DEL	-0.000716221	0.00287569	0.803314	0.910057
GP	Brain	testis	Tissue_Fantom60	NonBrain		DEL	0.00686721	0.00582467	0.238404	0.489449
MoodSwings	Brain	testis	Tissue_Fantom60	NonBrain		DEL	0.0306343	0.0254253	0.228082	0.478687
RiskTaking	Brain	testis	Tissue_Fantom60	NonBrain		DEL	0.0220456	0.0297423	0.459542	0.701017
Loneliness	Brain	testis	Tissue_Fantom60	NonBrain		DEL	0.0127614	0.030779	0.678815	0.842938
Irritability	Brain	testis	Tissue_Fantom60	NonBrain		DEL	0.017643	0.028209	0.532248	0.757697
Miserableness	Brain	testis	Tissue_Fantom60	NonBrain		DEL	-0.0215877	0.0255692	0.398024	0.649985
Hypertention	NonBrain	testis	Tissue_Fantom60	NonBrain		DEL	0.0518416	0.0284708	0.0697363	0.230666
GuiltyFeelings	Brain	testis	Tissue_Fantom60	NonBrain		DEL	0.0131234	0.028201	0.641998	0.823342
MoodAnxiety	Brain	testis	Tissue_Fantom60	NonBrain		DEL	0.00532645	0.0131101	0.684534	0.845547
Albumin	NonBrain	occipital_lobe	Tissue_Fantom60	Brain		DEL	-0.0229593	0.0146369	0.116744	0.32092
BirthWeight	NonBrain	occipital_lobe	Tissue_Fantom60	Brain		DEL	-0.0636712	0.0189472	0.000778237	0.0093212
BMD	NonBrain	occipital_lobe	Tissue_Fantom60	Brain		DEL	0.0306065	0.0179996	0.0890566	0.270609
BMI	NonBrain	occipital_lobe	Tissue_Fantom60	Brain		DEL	0.0850944	0.0137694	6.42e-10	5e-08
Calcium	NonBrain	occipital_lobe	Tissue_Fantom60	Brain		DEL	-0.00519613	0.0148408	0.726246	0.86999
Cholesterol	NonBrain	occipital_lobe	Tissue_Fantom60	Brain		DEL	-0.0364364	0.0140043	0.00927392	0.059042
FEV1	NonBrain	occipital_lobe	Tissue_Fantom60	Brain		DEL	-0.0863177	0.0105553	2.9e-16	6.6e-14
FVC	NonBrain	occipital_lobe	Tissue_Fantom60	Brain		DEL	-0.0928971	0.0102323	1.1e-19	4.18e-17
Gamma	NonBrain	occipital_lobe	Tissue_Fantom60	Brain		DEL	0.0219371	0.0132978	0.0990096	0.289384
Glucose	NonBrain	occipital_lobe	Tissue_Fantom60	Brain		DEL	0.0258532	0.01473	0.0792373	0.25062
HbA1c	NonBrain	occipital_lobe	Tissue_Fantom60	Brain		DEL	0.0425404	0.0135394	0.00167825	0.0166497
HDL	NonBrain	occipital_lobe	Tissue_Fantom60	Brain		DEL	-0.0775388	0.0135061	9.42e-09	5.93e-07
IGF1	NonBrain	occipital_lobe	Tissue_Fantom60	Brain		DEL	-0.0169736	0.0137375	0.216623	0.465981
LDL	NonBrain	occipital_lobe	Tissue_Fantom60	Brain		DEL	-0.0243936	0.0142064	0.0859646	0.264584
Neuroticism	Brain	occipital_lobe	Tissue_Fantom60	Brain		DEL	0.0715374	0.0155123	4e-06	0.000128498
Platelet	NonBrain	occipital_lobe	Tissue_Fantom60	Brain		DEL	0.0206251	0.0136213	0.129982	0.341265
Reaction	Brain	occipital_lobe	Tissue_Fantom60	Brain		DEL	0.108042	0.0130406	1.18e-16	2.82e-14
Redblood	NonBrain	occipital_lobe	Tissue_Fantom60	Brain		DEL	0.0528958	0.0119633	9.8e-06	0.000271851
StandingHeight	NonBrain	occipital_lobe	Tissue_Fantom60	Brain		DEL	-0.0873889	0.00970779	2.23e-19	7.84e-17
TDI	Brain	occipital_lobe	Tissue_Fantom60	Brain		DEL	0.0913046	0.0135812	1.78e-11	1.85e-09
Triglycerides	NonBrain	occipital_lobe	Tissue_Fantom60	Brain		DEL	0.0375411	0.0138154	0.00658139	0.0459207
EA	Brain	occipital_lobe	Tissue_Fantom60	Brain		DEL	-0.10591	0.0136658	9.21e-15	1.6e-12
FI	Brain	occipital_lobe	Tissue_Fantom60	Brain		DEL	-0.131202	0.0176648	1.11e-13	1.69e-11
HeartRate	NonBrain	occipital_lobe	Tissue_Fantom60	Brain		DEL	0.0226867	0.0143005	0.112644	0.313673
MET	NonBrain	occipital_lobe	Tissue_Fantom60	Brain		DEL	0.0141665	0.0164513	0.389176	0.641771
SexPartners	NonBrain	occipital_lobe	Tissue_Fantom60	Brain		DEL	-0.0493459	0.0145508	0.000695709	0.00855438
SymbolDigit	Brain	occipital_lobe	Tissue_Fantom60	Brain		DEL	-0.0694499	0.0228744	0.00239666	0.0215252
TrailMaking1	Brain	occipital_lobe	Tissue_Fantom60	Brain		DEL	0.0388991	0.0261942	0.13754	0.353676
TrailMaking2	Brain	occipital_lobe	Tissue_Fantom60	Brain		DEL	0.113324	0.0255235	9e-06	0.000253215
VSWM1	Brain	occipital_lobe	Tissue_Fantom60	Brain		DEL	0.0386531	0.0142044	0.00650464	0.0455767
VSWM2	Brain	occipital_lobe	Tissue_Fantom60	Brain		DEL	0.059812	0.0135282	9.81e-06	0.000271851
Menarche	NonBrain	occipital_lobe	Tissue_Fantom60	Brain		DEL	-0.0578553	0.0196217	0.00319318	0.0268879
Menopause	NonBrain	occipital_lobe	Tissue_Fantom60	Brain		DEL	-0.00900701	0.0258712	0.727729	0.871202
Depression	Brain	occipital_lobe	Tissue_Fantom60	Brain		DEL	3.61e-06	0.00323595	0.999111	0.999349
GP	Brain	occipital_lobe	Tissue_Fantom60	Brain		DEL	0.00243656	0.00657311	0.710872	0.861221
MoodSwings	Brain	occipital_lobe	Tissue_Fantom60	Brain		DEL	0.120527	0.0288341	2.86e-05	0.000649036
RiskTaking	Brain	occipital_lobe	Tissue_Fantom60	Brain		DEL	-0.106393	0.0345459	0.00192762	0.0183484
Loneliness	Brain	occipital_lobe	Tissue_Fantom60	Brain		DEL	0.159337	0.0336367	2.59e-06	8.96e-05
Irritability	Brain	occipital_lobe	Tissue_Fantom60	Brain		DEL	0.02733	0.0320937	0.394894	0.647089
Miserableness	Brain	occipital_lobe	Tissue_Fantom60	Brain		DEL	0.121255	0.0288329	2.59e-05	0.00059631
Hypertention	NonBrain	occipital_lobe	Tissue_Fantom60	Brain		DEL	0.0685354	0.0323799	0.0347541	0.14588
GuiltyFeelings	Brain	occipital_lobe	Tissue_Fantom60	Brain		DEL	0.0679561	0.03147	0.031235	0.135771
MoodAnxiety	Brain	occipital_lobe	Tissue_Fantom60	Brain		DEL	0.0866243	0.0148217	5.09e-09	3.39e-07
Albumin	NonBrain	pituitary_gland	Tissue_Fantom60	Brain		DEL	-0.023936	0.0115268	0.0378434	0.154597
BirthWeight	NonBrain	pituitary_gland	Tissue_Fantom60	Brain		DEL	0.00320393	0.0144083	0.824028	0.921189
BMD	NonBrain	pituitary_gland	Tissue_Fantom60	Brain		DEL	0.00269916	0.0137253	0.844097	0.930832
BMI	NonBrain	pituitary_gland	Tissue_Fantom60	Brain		DEL	0.0132767	0.0108283	0.220155	0.469242
Calcium	NonBrain	pituitary_gland	Tissue_Fantom60	Brain		DEL	-0.0123816	0.0116915	0.289587	0.546095
Cholesterol	NonBrain	pituitary_gland	Tissue_Fantom60	Brain		DEL	-0.0257383	0.0109896	0.0191777	0.0986017
FEV1	NonBrain	pituitary_gland	Tissue_Fantom60	Brain		DEL	-0.0347019	0.00840481	3.65e-05	0.000801617
FVC	NonBrain	pituitary_gland	Tissue_Fantom60	Brain		DEL	-0.0310052	0.00814965	0.000142122	0.00241919
Gamma	NonBrain	pituitary_gland	Tissue_Fantom60	Brain		DEL	-0.0139107	0.01044	0.182714	0.41922
Glucose	NonBrain	pituitary_gland	Tissue_Fantom60	Brain		DEL	-0.00220912	0.0115882	0.848811	0.933087
HbA1c	NonBrain	pituitary_gland	Tissue_Fantom60	Brain		DEL	-0.00995062	0.0106303	0.349242	0.605626
HDL	NonBrain	pituitary_gland	Tissue_Fantom60	Brain		DEL	-0.0223384	0.0106339	0.0356692	0.148458
IGF1	NonBrain	pituitary_gland	Tissue_Fantom60	Brain		DEL	-0.0262808	0.0107792	0.014765	0.0825023
LDL	NonBrain	pituitary_gland	Tissue_Fantom60	Brain		DEL	-0.0246891	0.0111421	0.0267028	0.122743
Neuroticism	Brain	pituitary_gland	Tissue_Fantom60	Brain		DEL	0.00956687	0.0121061	0.429382	0.67701
Platelet	NonBrain	pituitary_gland	Tissue_Fantom60	Brain		DEL	-0.0117413	0.010698	0.272414	0.526836
Reaction	Brain	pituitary_gland	Tissue_Fantom60	Brain		DEL	-0.000895941	0.0102345	0.930242	0.970855
Redblood	NonBrain	pituitary_gland	Tissue_Fantom60	Brain		DEL	-0.00198491	0.00939444	0.832664	0.925169
StandingHeight	NonBrain	pituitary_gland	Tissue_Fantom60	Brain		DEL	-0.0270895	0.00764129	0.000392434	0.00551538
TDI	Brain	pituitary_gland	Tissue_Fantom60	Brain		DEL	0.0205084	0.01068	0.0548252	0.197173
Triglycerides	NonBrain	pituitary_gland	Tissue_Fantom60	Brain		DEL	-8.87e-05	0.0108326	0.993468	0.997128
EA	Brain	pituitary_gland	Tissue_Fantom60	Brain		DEL	-0.040308	0.0107496	0.000177047	0.00290115
FI	Brain	pituitary_gland	Tissue_Fantom60	Brain		DEL	-0.015708	0.0140609	0.263933	0.519024
HeartRate	NonBrain	pituitary_gland	Tissue_Fantom60	Brain		DEL	0.00147808	0.0112416	0.895393	0.954939
MET	NonBrain	pituitary_gland	Tissue_Fantom60	Brain		DEL	-0.0218904	0.0129228	0.0902786	0.273144
SexPartners	NonBrain	pituitary_gland	Tissue_Fantom60	Brain		DEL	-0.00734015	0.011269	0.514817	0.745316
SymbolDigit	Brain	pituitary_gland	Tissue_Fantom60	Brain		DEL	0.0104556	0.0179044	0.559243	0.774273
TrailMaking1	Brain	pituitary_gland	Tissue_Fantom60	Brain		DEL	0.00637263	0.0204433	0.755252	0.885658
TrailMaking2	Brain	pituitary_gland	Tissue_Fantom60	Brain		DEL	-0.0124637	0.0199561	0.532263	0.757697
VSWM1	Brain	pituitary_gland	Tissue_Fantom60	Brain		DEL	0.0174529	0.0111636	0.117965	0.322669
VSWM2	Brain	pituitary_gland	Tissue_Fantom60	Brain		DEL	0.0105113	0.0106112	0.321888	0.578959
Menarche	NonBrain	pituitary_gland	Tissue_Fantom60	Brain		DEL	-0.000561404	0.0151063	0.970355	0.987512
Menopause	NonBrain	pituitary_gland	Tissue_Fantom60	Brain		DEL	-0.0128852	0.0194919	0.508581	0.740664
Depression	Brain	pituitary_gland	Tissue_Fantom60	Brain		DEL	-0.000136273	0.00254703	0.957332	0.981906
GP	Brain	pituitary_gland	Tissue_Fantom60	Brain		DEL	0.00316564	0.00517167	0.540464	0.76202
MoodSwings	Brain	pituitary_gland	Tissue_Fantom60	Brain		DEL	0.013799	0.0225595	0.540605	0.76202
RiskTaking	Brain	pituitary_gland	Tissue_Fantom60	Brain		DEL	-0.0287105	0.0267308	0.281186	0.536547
Loneliness	Brain	pituitary_gland	Tissue_Fantom60	Brain		DEL	-0.00376917	0.0275846	0.891174	0.953275
Irritability	Brain	pituitary_gland	Tissue_Fantom60	Brain		DEL	0.0463117	0.0248785	0.0637054	0.217427
Miserableness	Brain	pituitary_gland	Tissue_Fantom60	Brain		DEL	-0.00326409	0.0227288	0.885758	0.950457
Hypertention	NonBrain	pituitary_gland	Tissue_Fantom60	Brain		DEL	0.0362826	0.0253987	0.154429	0.380847
GuiltyFeelings	Brain	pituitary_gland	Tissue_Fantom60	Brain		DEL	-5.18e-05	0.0249043	0.997289	0.998589
MoodAnxiety	Brain	pituitary_gland	Tissue_Fantom60	Brain		DEL	0.0162416	0.0116176	0.162109	0.392264
Albumin	NonBrain	spleen	Tissue_Fantom60	NonBrain		DEL	-0.0205354	0.012473	0.0996841	0.29039
BirthWeight	NonBrain	spleen	Tissue_Fantom60	NonBrain		DEL	-0.0422748	0.0156173	0.00679155	0.0469894
BMD	NonBrain	spleen	Tissue_Fantom60	NonBrain		DEL	0.00216057	0.0154193	0.888564	0.951748
BMI	NonBrain	spleen	Tissue_Fantom60	NonBrain		DEL	0.0362991	0.0116672	0.00186336	0.0178979
Calcium	NonBrain	spleen	Tissue_Fantom60	NonBrain		DEL	-0.0147784	0.012645	0.242519	0.493989
Cholesterol	NonBrain	spleen	Tissue_Fantom60	NonBrain		DEL	0.00972733	0.0119333	0.414994	0.665718
FEV1	NonBrain	spleen	Tissue_Fantom60	NonBrain		DEL	-0.0186171	0.00892623	0.03701	0.152282
FVC	NonBrain	spleen	Tissue_Fantom60	NonBrain		DEL	-0.0184564	0.00865303	0.0329302	0.140879
Gamma	NonBrain	spleen	Tissue_Fantom60	NonBrain		DEL	0.0148562	0.0113292	0.189751	0.428845
Glucose	NonBrain	spleen	Tissue_Fantom60	NonBrain		DEL	-0.0101512	0.0125626	0.419062	0.668496
HbA1c	NonBrain	spleen	Tissue_Fantom60	NonBrain		DEL	0.00771165	0.0114385	0.500194	0.733929
HDL	NonBrain	spleen	Tissue_Fantom60	NonBrain		DEL	0.00172004	0.0115108	0.881216	0.948033
IGF1	NonBrain	spleen	Tissue_Fantom60	NonBrain		DEL	-0.0265117	0.0117078	0.0235471	0.113161
LDL	NonBrain	spleen	Tissue_Fantom60	NonBrain		DEL	0.00928211	0.0121033	0.443136	0.688465
Neuroticism	Brain	spleen	Tissue_Fantom60	NonBrain		DEL	-0.00733381	0.0131634	0.577435	0.785924
Platelet	NonBrain	spleen	Tissue_Fantom60	NonBrain		DEL	0.0151027	0.0115572	0.19129	0.431178
Reaction	Brain	spleen	Tissue_Fantom60	NonBrain		DEL	0.0221971	0.0110631	0.0448132	0.17157
Redblood	NonBrain	spleen	Tissue_Fantom60	NonBrain		DEL	0.000950023	0.0101503	0.92543	0.968582
StandingHeight	NonBrain	spleen	Tissue_Fantom60	NonBrain		DEL	-0.00909245	0.00822763	0.269112	0.523845
TDI	Brain	spleen	Tissue_Fantom60	NonBrain		DEL	0.0434741	0.0114988	0.000156373	0.00262535
Triglycerides	NonBrain	spleen	Tissue_Fantom60	NonBrain		DEL	0.0147796	0.0117641	0.208997	0.456433
EA	Brain	spleen	Tissue_Fantom60	NonBrain		DEL	-0.0264552	0.011575	0.0222814	0.108888
FI	Brain	spleen	Tissue_Fantom60	NonBrain		DEL	-0.00970164	0.0148689	0.514092	0.74501
HeartRate	NonBrain	spleen	Tissue_Fantom60	NonBrain		DEL	-0.021566	0.0121437	0.0757511	0.243061
MET	NonBrain	spleen	Tissue_Fantom60	NonBrain		DEL	0.000551041	0.0137159	0.967953	0.986765
SexPartners	NonBrain	spleen	Tissue_Fantom60	NonBrain		DEL	-0.00537579	0.0121952	0.65935	0.83222
SymbolDigit	Brain	spleen	Tissue_Fantom60	NonBrain		DEL	-0.0105615	0.0192262	0.58278	0.788627
TrailMaking1	Brain	spleen	Tissue_Fantom60	NonBrain		DEL	0.0315471	0.0218419	0.148647	0.371542
TrailMaking2	Brain	spleen	Tissue_Fantom60	NonBrain		DEL	0.00462606	0.0211145	0.826577	0.922056
VSWM1	Brain	spleen	Tissue_Fantom60	NonBrain		DEL	0.00157029	0.0121113	0.89684	0.955404
VSWM2	Brain	spleen	Tissue_Fantom60	NonBrain		DEL	-0.00768844	0.0115051	0.503964	0.73677
Menarche	NonBrain	spleen	Tissue_Fantom60	NonBrain		DEL	-0.0487457	0.0162876	0.00276447	0.0240041
Menopause	NonBrain	spleen	Tissue_Fantom60	NonBrain		DEL	-0.0192181	0.0212464	0.365714	0.619945
Depression	Brain	spleen	Tissue_Fantom60	NonBrain		DEL	0.00243969	0.00274295	0.373767	0.627447
GP	Brain	spleen	Tissue_Fantom60	NonBrain		DEL	-0.00949829	0.00556339	0.0877699	0.268076
MoodSwings	Brain	spleen	Tissue_Fantom60	NonBrain		DEL	0.0112376	0.0242968	0.643547	0.824186
RiskTaking	Brain	spleen	Tissue_Fantom60	NonBrain		DEL	-0.0249703	0.0288384	0.384618	0.636669
Loneliness	Brain	spleen	Tissue_Fantom60	NonBrain		DEL	-0.0251484	0.0302346	0.403313	0.655367
Irritability	Brain	spleen	Tissue_Fantom60	NonBrain		DEL	0.0293353	0.0270677	0.279981	0.535115
Miserableness	Brain	spleen	Tissue_Fantom60	NonBrain		DEL	0.00972941	0.0244553	0.690641	0.849419
Hypertention	NonBrain	spleen	Tissue_Fantom60	NonBrain		DEL	0.037107	0.0271779	0.173482	0.407246
GuiltyFeelings	Brain	spleen	Tissue_Fantom60	NonBrain		DEL	-0.0109715	0.0270052	0.683984	0.845237
MoodAnxiety	Brain	spleen	Tissue_Fantom60	NonBrain		DEL	-0.00720619	0.0126029	0.567465	0.779816
Albumin	NonBrain	liver	Tissue_Fantom60	NonBrain		DEL	-0.000755633	0.0136986	0.95601	0.981625
BirthWeight	NonBrain	liver	Tissue_Fantom60	NonBrain		DEL	0.0134954	0.0174261	0.438674	0.684841
BMD	NonBrain	liver	Tissue_Fantom60	NonBrain		DEL	-0.0193559	0.0166138	0.243999	0.495638
BMI	NonBrain	liver	Tissue_Fantom60	NonBrain		DEL	-0.0176882	0.0129563	0.172184	0.405694
Calcium	NonBrain	liver	Tissue_Fantom60	NonBrain		DEL	-0.0303292	0.0138901	0.0289984	0.129434
Cholesterol	NonBrain	liver	Tissue_Fantom60	NonBrain		DEL	-0.00919336	0.0132065	0.486352	0.722955
FEV1	NonBrain	liver	Tissue_Fantom60	NonBrain		DEL	-0.0346538	0.00990502	0.000467736	0.00638261
FVC	NonBrain	liver	Tissue_Fantom60	NonBrain		DEL	-0.0343622	0.00960224	0.000345527	0.00499125
Gamma	NonBrain	liver	Tissue_Fantom60	NonBrain		DEL	-0.00819713	0.0125421	0.513388	0.744652
Glucose	NonBrain	liver	Tissue_Fantom60	NonBrain		DEL	-0.0245161	0.0137823	0.0752719	0.242048
HbA1c	NonBrain	liver	Tissue_Fantom60	NonBrain		DEL	-0.00105423	0.0126255	0.933454	0.971923
HDL	NonBrain	liver	Tissue_Fantom60	NonBrain		DEL	0.00663334	0.0126441	0.599847	0.796553
IGF1	NonBrain	liver	Tissue_Fantom60	NonBrain		DEL	-0.0154993	0.0129477	0.23128	0.481573
LDL	NonBrain	liver	Tissue_Fantom60	NonBrain		DEL	-0.00946177	0.0134048	0.480282	0.718826
Neuroticism	Brain	liver	Tissue_Fantom60	NonBrain		DEL	-0.0162172	0.0144375	0.261324	0.51602
Platelet	NonBrain	liver	Tissue_Fantom60	NonBrain		DEL	-0.0028266	0.0127958	0.825169	0.921479
Reaction	Brain	liver	Tissue_Fantom60	NonBrain		DEL	-0.0145826	0.0122494	0.233858	0.484418
Redblood	NonBrain	liver	Tissue_Fantom60	NonBrain		DEL	0.00697916	0.0112388	0.534607	0.758823
StandingHeight	NonBrain	liver	Tissue_Fantom60	NonBrain		DEL	-0.0191997	0.00914426	0.0357602	0.148627
TDI	Brain	liver	Tissue_Fantom60	NonBrain		DEL	0.0166509	0.0127669	0.192156	0.432191
Triglycerides	NonBrain	liver	Tissue_Fantom60	NonBrain		DEL	-0.0204069	0.01302	0.117033	0.321356
EA	Brain	liver	Tissue_Fantom60	NonBrain		DEL	-0.00650885	0.0128414	0.612251	0.803515
FI	Brain	liver	Tissue_Fantom60	NonBrain		DEL	-0.045368	0.0163362	0.00548424	0.0405007
HeartRate	NonBrain	liver	Tissue_Fantom60	NonBrain		DEL	0.00131638	0.0135955	0.922865	0.967403
MET	NonBrain	liver	Tissue_Fantom60	NonBrain		DEL	-0.00360418	0.0150116	0.810259	0.913657
SexPartners	NonBrain	liver	Tissue_Fantom60	NonBrain		DEL	-0.00814513	0.0134679	0.545324	0.765072
SymbolDigit	Brain	liver	Tissue_Fantom60	NonBrain		DEL	-0.018941	0.0200321	0.344388	0.601125
TrailMaking1	Brain	liver	Tissue_Fantom60	NonBrain		DEL	0.0105782	0.022932	0.644594	0.824527
TrailMaking2	Brain	liver	Tissue_Fantom60	NonBrain		DEL	0.0240072	0.0225177	0.28636	0.54243
VSWM1	Brain	liver	Tissue_Fantom60	NonBrain		DEL	0.0127522	0.0133419	0.339172	0.596429
VSWM2	Brain	liver	Tissue_Fantom60	NonBrain		DEL	0.00641001	0.0127124	0.614097	0.804795
Menarche	NonBrain	liver	Tissue_Fantom60	NonBrain		DEL	0.00419226	0.0180916	0.816753	0.917203
Menopause	NonBrain	liver	Tissue_Fantom60	NonBrain		DEL	-0.0732865	0.0236281	0.00192473	0.0183327
Depression	Brain	liver	Tissue_Fantom60	NonBrain		DEL	-0.000880467	0.00304515	0.772476	0.894348
GP	Brain	liver	Tissue_Fantom60	NonBrain		DEL	-0.0037659	0.00616899	0.54156	0.762494
MoodSwings	Brain	liver	Tissue_Fantom60	NonBrain		DEL	0.00306741	0.027119	0.909889	0.961026
RiskTaking	Brain	liver	Tissue_Fantom60	NonBrain		DEL	0.0623346	0.0309132	0.0453506	0.173072
Loneliness	Brain	liver	Tissue_Fantom60	NonBrain		DEL	0.01183	0.032688	0.717749	0.864863
Irritability	Brain	liver	Tissue_Fantom60	NonBrain		DEL	0.0233723	0.0301391	0.439012	0.685079
Miserableness	Brain	liver	Tissue_Fantom60	NonBrain		DEL	-0.029689	0.0272692	0.275629	0.530667
Hypertention	NonBrain	liver	Tissue_Fantom60	NonBrain		DEL	0.0489626	0.03033	0.10815	0.305891
GuiltyFeelings	Brain	liver	Tissue_Fantom60	NonBrain		DEL	-0.0458759	0.030208	0.126466	0.336416
MoodAnxiety	Brain	liver	Tissue_Fantom60	NonBrain		DEL	-0.00427139	0.0140131	0.760508	0.887732
Albumin	NonBrain	esophagus	Tissue_Fantom60	NonBrain		DEL	-0.0171472	0.0124652	0.168945	0.401774
BirthWeight	NonBrain	esophagus	Tissue_Fantom60	NonBrain		DEL	0.00487365	0.0158973	0.75917	0.887368
BMD	NonBrain	esophagus	Tissue_Fantom60	NonBrain		DEL	0.00796501	0.0153277	0.603311	0.798155
BMI	NonBrain	esophagus	Tissue_Fantom60	NonBrain		DEL	0.00276026	0.0118108	0.815212	0.916239
Calcium	NonBrain	esophagus	Tissue_Fantom60	NonBrain		DEL	-0.0150528	0.0126394	0.233675	0.484241
Cholesterol	NonBrain	esophagus	Tissue_Fantom60	NonBrain		DEL	-0.0284165	0.0119654	0.0175547	0.0925769
FEV1	NonBrain	esophagus	Tissue_Fantom60	NonBrain		DEL	-0.0328504	0.00903948	0.000278987	0.00421506
FVC	NonBrain	esophagus	Tissue_Fantom60	NonBrain		DEL	-0.0377273	0.00876341	1.67e-05	0.000419898
Gamma	NonBrain	esophagus	Tissue_Fantom60	NonBrain		DEL	0.00700519	0.0113656	0.537664	0.760555
Glucose	NonBrain	esophagus	Tissue_Fantom60	NonBrain		DEL	-0.0112029	0.0125328	0.371383	0.625638
HbA1c	NonBrain	esophagus	Tissue_Fantom60	NonBrain		DEL	0.0222046	0.011586	0.055301	0.198547
HDL	NonBrain	esophagus	Tissue_Fantom60	NonBrain		DEL	0.000808065	0.0114983	0.943973	0.975769
IGF1	NonBrain	esophagus	Tissue_Fantom60	NonBrain		DEL	-0.012846	0.0117369	0.273738	0.528629
LDL	NonBrain	esophagus	Tissue_Fantom60	NonBrain		DEL	-0.031831	0.0121335	0.00870614	0.0563961
Neuroticism	Brain	esophagus	Tissue_Fantom60	NonBrain		DEL	0.0216381	0.0131174	0.0990305	0.289384
Platelet	NonBrain	esophagus	Tissue_Fantom60	NonBrain		DEL	-0.0136682	0.0116733	0.241642	0.492676
Reaction	Brain	esophagus	Tissue_Fantom60	NonBrain		DEL	0.00642949	0.0111949	0.565748	0.77904
Redblood	NonBrain	esophagus	Tissue_Fantom60	NonBrain		DEL	-0.0016249	0.0102529	0.874077	0.94532
StandingHeight	NonBrain	esophagus	Tissue_Fantom60	NonBrain		DEL	-0.0290665	0.00833325	0.000486667	0.00654456
TDI	Brain	esophagus	Tissue_Fantom60	NonBrain		DEL	0.0046932	0.0116444	0.686917	0.846881
Triglycerides	NonBrain	esophagus	Tissue_Fantom60	NonBrain		DEL	-0.0102364	0.0117931	0.385394	0.637668
EA	Brain	esophagus	Tissue_Fantom60	NonBrain		DEL	-0.0176067	0.011738	0.133622	0.346943
FI	Brain	esophagus	Tissue_Fantom60	NonBrain		DEL	-0.00283227	0.0149774	0.850013	0.933573
HeartRate	NonBrain	esophagus	Tissue_Fantom60	NonBrain		DEL	-0.00631434	0.0122873	0.607329	0.80075
MET	NonBrain	esophagus	Tissue_Fantom60	NonBrain		DEL	0.00544335	0.0137238	0.691635	0.850077
SexPartners	NonBrain	esophagus	Tissue_Fantom60	NonBrain		DEL	0.00487474	0.0123145	0.692213	0.85052
SymbolDigit	Brain	esophagus	Tissue_Fantom60	NonBrain		DEL	-0.0217559	0.0189206	0.250208	0.503205
TrailMaking1	Brain	esophagus	Tissue_Fantom60	NonBrain		DEL	0.0167015	0.0221174	0.450173	0.69391
TrailMaking2	Brain	esophagus	Tissue_Fantom60	NonBrain		DEL	-0.0150185	0.0213972	0.482748	0.720349
VSWM1	Brain	esophagus	Tissue_Fantom60	NonBrain		DEL	0.0108464	0.0121901	0.373591	0.62733
VSWM2	Brain	esophagus	Tissue_Fantom60	NonBrain		DEL	0.00577333	0.0116184	0.619251	0.808612
Menarche	NonBrain	esophagus	Tissue_Fantom60	NonBrain		DEL	0.0379645	0.0168615	0.0243516	0.115823
Menopause	NonBrain	esophagus	Tissue_Fantom60	NonBrain		DEL	0.0288474	0.0218617	0.186991	0.425085
Depression	Brain	esophagus	Tissue_Fantom60	NonBrain		DEL	0.00458981	0.00277714	0.0983902	0.28831
GP	Brain	esophagus	Tissue_Fantom60	NonBrain		DEL	0.00982967	0.00563077	0.0808626	0.253845
MoodSwings	Brain	esophagus	Tissue_Fantom60	NonBrain		DEL	0.0290559	0.0246088	0.237399	0.488476
RiskTaking	Brain	esophagus	Tissue_Fantom60	NonBrain		DEL	0.0628266	0.028098	0.0262725	0.121635
Loneliness	Brain	esophagus	Tissue_Fantom60	NonBrain		DEL	0.0435421	0.0295781	0.143168	0.362255
Irritability	Brain	esophagus	Tissue_Fantom60	NonBrain		DEL	0.0853308	0.0267618	0.00153928	0.0155739
Miserableness	Brain	esophagus	Tissue_Fantom60	NonBrain		DEL	0.00598605	0.0247205	0.808582	0.913199
Hypertention	NonBrain	esophagus	Tissue_Fantom60	NonBrain		DEL	0.0167218	0.0278578	0.548853	0.767398
GuiltyFeelings	Brain	esophagus	Tissue_Fantom60	NonBrain		DEL	0.00192952	0.0271489	0.94326	0.975654
MoodAnxiety	Brain	esophagus	Tissue_Fantom60	NonBrain		DEL	0.0196548	0.0126493	0.120228	0.326733
Albumin	NonBrain	medulla_oblongata	Tissue_Fantom60	Brain		DEL	-0.0205864	0.0113637	0.0700503	0.231394
BirthWeight	NonBrain	medulla_oblongata	Tissue_Fantom60	Brain		DEL	-0.0281093	0.0147145	0.0560934	0.200613
BMD	NonBrain	medulla_oblongata	Tissue_Fantom60	Brain		DEL	0.0159571	0.0137775	0.246785	0.499172
BMI	NonBrain	medulla_oblongata	Tissue_Fantom60	Brain		DEL	-0.00323273	0.010743	0.76348	0.889874
Calcium	NonBrain	medulla_oblongata	Tissue_Fantom60	Brain		DEL	-0.0112612	0.0115245	0.328494	0.585573
Cholesterol	NonBrain	medulla_oblongata	Tissue_Fantom60	Brain		DEL	-0.0310033	0.0108852	0.00439698	0.0341848
FEV1	NonBrain	medulla_oblongata	Tissue_Fantom60	Brain		DEL	-0.0330736	0.00825708	6.19e-05	0.00122577
FVC	NonBrain	medulla_oblongata	Tissue_Fantom60	Brain		DEL	-0.0288543	0.00800544	0.000312988	0.00461128
Gamma	NonBrain	medulla_oblongata	Tissue_Fantom60	Brain		DEL	-0.0308014	0.0103361	0.0028829	0.0248724
Glucose	NonBrain	medulla_oblongata	Tissue_Fantom60	Brain		DEL	0.0006707	0.0114638	0.953346	0.980359
HbA1c	NonBrain	medulla_oblongata	Tissue_Fantom60	Brain		DEL	-0.0203952	0.0105438	0.0530732	0.193317
HDL	NonBrain	medulla_oblongata	Tissue_Fantom60	Brain		DEL	-0.0455078	0.0104834	1.42e-05	0.000366371
IGF1	NonBrain	medulla_oblongata	Tissue_Fantom60	Brain		DEL	-0.00114915	0.0106714	0.914246	0.963059
LDL	NonBrain	medulla_oblongata	Tissue_Fantom60	Brain		DEL	-0.0217033	0.0110401	0.0493157	0.18384
Neuroticism	Brain	medulla_oblongata	Tissue_Fantom60	Brain		DEL	0.0775813	0.0120741	1.32e-10	1.17e-08
Platelet	NonBrain	medulla_oblongata	Tissue_Fantom60	Brain		DEL	-0.00425243	0.0105952	0.68816	0.847914
Reaction	Brain	medulla_oblongata	Tissue_Fantom60	Brain		DEL	0.0290168	0.0101665	0.00431548	0.0336858
Redblood	NonBrain	medulla_oblongata	Tissue_Fantom60	Brain		DEL	-0.00821688	0.0093056	0.377235	0.631378
StandingHeight	NonBrain	medulla_oblongata	Tissue_Fantom60	Brain		DEL	-0.0208132	0.00756611	0.00594441	0.0429764
TDI	Brain	medulla_oblongata	Tissue_Fantom60	Brain		DEL	0.0355712	0.0105732	0.000767517	0.00923186
Triglycerides	NonBrain	medulla_oblongata	Tissue_Fantom60	Brain		DEL	0.00828998	0.0107303	0.439775	0.685475
EA	Brain	medulla_oblongata	Tissue_Fantom60	Brain		DEL	-0.0641374	0.0106593	1.78e-09	1.28e-07
FI	Brain	medulla_oblongata	Tissue_Fantom60	Brain		DEL	-0.0563835	0.0139484	5.29e-05	0.00107728
HeartRate	NonBrain	medulla_oblongata	Tissue_Fantom60	Brain		DEL	0.00852976	0.0111671	0.444969	0.68979
MET	NonBrain	medulla_oblongata	Tissue_Fantom60	Brain		DEL	0.00596571	0.0127223	0.639129	0.820744
SexPartners	NonBrain	medulla_oblongata	Tissue_Fantom60	Brain		DEL	-0.0108585	0.0113079	0.336926	0.593811
SymbolDigit	Brain	medulla_oblongata	Tissue_Fantom60	Brain		DEL	-0.0563077	0.0178843	0.00164173	0.0163863
TrailMaking1	Brain	medulla_oblongata	Tissue_Fantom60	Brain		DEL	0.0247802	0.0204368	0.225312	0.475234
TrailMaking2	Brain	medulla_oblongata	Tissue_Fantom60	Brain		DEL	0.0387264	0.0199763	0.0525495	0.192084
VSWM1	Brain	medulla_oblongata	Tissue_Fantom60	Brain		DEL	0.0145677	0.0110896	0.188969	0.427666
VSWM2	Brain	medulla_oblongata	Tissue_Fantom60	Brain		DEL	0.0217681	0.0105497	0.0390764	0.158174
Menarche	NonBrain	medulla_oblongata	Tissue_Fantom60	Brain		DEL	0.0618911	0.0151418	4.36e-05	0.000919394
Menopause	NonBrain	medulla_oblongata	Tissue_Fantom60	Brain		DEL	-0.00341023	0.0199147	0.864033	0.940524
Depression	Brain	medulla_oblongata	Tissue_Fantom60	Brain		DEL	0.00570412	0.00252122	0.0236703	0.113495
GP	Brain	medulla_oblongata	Tissue_Fantom60	Brain		DEL	0.015117	0.0051183	0.0031418	0.0266269
MoodSwings	Brain	medulla_oblongata	Tissue_Fantom60	Brain		DEL	0.100833	0.0224205	6.74e-06	0.000200955
RiskTaking	Brain	medulla_oblongata	Tissue_Fantom60	Brain		DEL	-0.0274641	0.0265495	0.299734	0.556744
Loneliness	Brain	medulla_oblongata	Tissue_Fantom60	Brain		DEL	0.124935	0.026303	2.58e-06	8.94e-05
Irritability	Brain	medulla_oblongata	Tissue_Fantom60	Brain		DEL	0.0530445	0.0248282	0.033241	0.141741
Miserableness	Brain	medulla_oblongata	Tissue_Fantom60	Brain		DEL	0.100238	0.0224521	7.99e-06	0.000231719
Hypertention	NonBrain	medulla_oblongata	Tissue_Fantom60	Brain		DEL	0.0552236	0.0250894	0.0282459	0.127343
GuiltyFeelings	Brain	medulla_oblongata	Tissue_Fantom60	Brain		DEL	0.0719816	0.0244394	0.00335417	0.0278699
MoodAnxiety	Brain	medulla_oblongata	Tissue_Fantom60	Brain		DEL	0.0916958	0.0115336	1.87e-15	3.58e-13
Albumin	NonBrain	salivary_gland	Tissue_Fantom60	NonBrain		DEL	0.00463297	0.0154077	0.76365	0.890002
BirthWeight	NonBrain	salivary_gland	Tissue_Fantom60	NonBrain		DEL	0.0294909	0.0196487	0.13338	0.346797
BMD	NonBrain	salivary_gland	Tissue_Fantom60	NonBrain		DEL	0.0117958	0.0179203	0.510387	0.742199
BMI	NonBrain	salivary_gland	Tissue_Fantom60	NonBrain		DEL	-0.0116779	0.0144465	0.418889	0.668496
Calcium	NonBrain	salivary_gland	Tissue_Fantom60	NonBrain		DEL	0.00754622	0.0156218	0.629055	0.814349
Cholesterol	NonBrain	salivary_gland	Tissue_Fantom60	NonBrain		DEL	0.00243032	0.0147942	0.869515	0.943159
FEV1	NonBrain	salivary_gland	Tissue_Fantom60	NonBrain		DEL	-0.00312478	0.0111721	0.779711	0.897967
FVC	NonBrain	salivary_gland	Tissue_Fantom60	NonBrain		DEL	-0.00250763	0.0108307	0.816903	0.917212
Gamma	NonBrain	salivary_gland	Tissue_Fantom60	NonBrain		DEL	-0.00534722	0.0140372	0.703253	0.856668
Glucose	NonBrain	salivary_gland	Tissue_Fantom60	NonBrain		DEL	-0.00869464	0.0154866	0.574505	0.784173
HbA1c	NonBrain	salivary_gland	Tissue_Fantom60	NonBrain		DEL	-0.0109273	0.0141183	0.438943	0.685079
HDL	NonBrain	salivary_gland	Tissue_Fantom60	NonBrain		DEL	0.026063	0.0142157	0.0667448	0.223926
IGF1	NonBrain	salivary_gland	Tissue_Fantom60	NonBrain		DEL	-0.0148766	0.0145163	0.305448	0.561823
LDL	NonBrain	salivary_gland	Tissue_Fantom60	NonBrain		DEL	-0.00289374	0.0150177	0.847203	0.932289
Neuroticism	Brain	salivary_gland	Tissue_Fantom60	NonBrain		DEL	0.00332754	0.0158585	0.833803	0.925252
Platelet	NonBrain	salivary_gland	Tissue_Fantom60	NonBrain		DEL	0.00545459	0.0143748	0.70435	0.857228
Reaction	Brain	salivary_gland	Tissue_Fantom60	NonBrain		DEL	0.00621263	0.0136792	0.649709	0.82768
Redblood	NonBrain	salivary_gland	Tissue_Fantom60	NonBrain		DEL	-0.0238161	0.0126247	0.0592325	0.207623
StandingHeight	NonBrain	salivary_gland	Tissue_Fantom60	NonBrain		DEL	0.0126012	0.01018	0.215779	0.464939
TDI	Brain	salivary_gland	Tissue_Fantom60	NonBrain		DEL	-0.00766764	0.0142368	0.590179	0.792906
Triglycerides	NonBrain	salivary_gland	Tissue_Fantom60	NonBrain		DEL	-0.0196401	0.0145819	0.178021	0.412224
EA	Brain	salivary_gland	Tissue_Fantom60	NonBrain		DEL	-0.0113288	0.0143183	0.42882	0.676673
FI	Brain	salivary_gland	Tissue_Fantom60	NonBrain		DEL	0.0201627	0.0195771	0.303051	0.560061
HeartRate	NonBrain	salivary_gland	Tissue_Fantom60	NonBrain		DEL	0.0437242	0.015438	0.00462252	0.0354833
MET	NonBrain	salivary_gland	Tissue_Fantom60	NonBrain		DEL	-0.0134597	0.0168053	0.423179	0.672203
SexPartners	NonBrain	salivary_gland	Tissue_Fantom60	NonBrain		DEL	0.0202174	0.0152459	0.18481	0.422195
SymbolDigit	Brain	salivary_gland	Tissue_Fantom60	NonBrain		DEL	0.0276794	0.0253676	0.275215	0.530322
TrailMaking1	Brain	salivary_gland	Tissue_Fantom60	NonBrain		DEL	0.0179858	0.0285893	0.529277	0.755701
TrailMaking2	Brain	salivary_gland	Tissue_Fantom60	NonBrain		DEL	-0.00133924	0.0275874	0.961282	0.984033
VSWM1	Brain	salivary_gland	Tissue_Fantom60	NonBrain		DEL	-0.00820458	0.0149938	0.584243	0.789146
VSWM2	Brain	salivary_gland	Tissue_Fantom60	NonBrain		DEL	0.0293483	0.0142768	0.0398159	0.159739
Menarche	NonBrain	salivary_gland	Tissue_Fantom60	NonBrain		DEL	-0.00663917	0.0211769	0.753893	0.885124
Menopause	NonBrain	salivary_gland	Tissue_Fantom60	NonBrain		DEL	0.0289919	0.0281232	0.302594	0.559583
Depression	Brain	salivary_gland	Tissue_Fantom60	NonBrain		DEL	0.00162336	0.00339506	0.632542	0.816169
GP	Brain	salivary_gland	Tissue_Fantom60	NonBrain		DEL	-0.00455107	0.00687495	0.507985	0.739943
MoodSwings	Brain	salivary_gland	Tissue_Fantom60	NonBrain		DEL	0.00562495	0.0301221	0.85161	0.934474
RiskTaking	Brain	salivary_gland	Tissue_Fantom60	NonBrain		DEL	0.0771894	0.0338605	0.0236833	0.11352
Loneliness	Brain	salivary_gland	Tissue_Fantom60	NonBrain		DEL	0.0385688	0.0353727	0.277138	0.532031
Irritability	Brain	salivary_gland	Tissue_Fantom60	NonBrain		DEL	0.021224	0.0329445	0.519803	0.748799
Miserableness	Brain	salivary_gland	Tissue_Fantom60	NonBrain		DEL	0.0300006	0.0302692	0.320576	0.577683
Hypertention	NonBrain	salivary_gland	Tissue_Fantom60	NonBrain		DEL	-0.0402478	0.0348625	0.244691	0.496621
GuiltyFeelings	Brain	salivary_gland	Tissue_Fantom60	NonBrain		DEL	-0.0319381	0.0339471	0.343339	0.600245
MoodAnxiety	Brain	salivary_gland	Tissue_Fantom60	NonBrain		DEL	0.011582	0.0156213	0.458436	0.699957
Albumin	NonBrain	occipital_cortex	Tissue_Fantom60	Brain		DEL	-0.0179394	0.0145939	0.218984	0.467821
BirthWeight	NonBrain	occipital_cortex	Tissue_Fantom60	Brain		DEL	-0.0682635	0.0186245	0.000247139	0.00381993
BMD	NonBrain	occipital_cortex	Tissue_Fantom60	Brain		DEL	0.0252349	0.0177568	0.155276	0.382044
BMI	NonBrain	occipital_cortex	Tissue_Fantom60	Brain		DEL	0.0744894	0.0137512	6.07e-08	3.31e-06
Calcium	NonBrain	occipital_cortex	Tissue_Fantom60	Brain		DEL	0.0175405	0.014797	0.235856	0.48659
Cholesterol	NonBrain	occipital_cortex	Tissue_Fantom60	Brain		DEL	-0.0295919	0.0139373	0.033736	0.143274
FEV1	NonBrain	occipital_cortex	Tissue_Fantom60	Brain		DEL	-0.0715841	0.0105187	1.01e-11	1.09e-09
FVC	NonBrain	occipital_cortex	Tissue_Fantom60	Brain		DEL	-0.0770679	0.0101977	4.12e-14	6.56e-12
Gamma	NonBrain	occipital_cortex	Tissue_Fantom60	Brain		DEL	0.000262701	0.0132328	0.984161	0.993362
Glucose	NonBrain	occipital_cortex	Tissue_Fantom60	Brain		DEL	0.0318128	0.0146858	0.0302942	0.133248
HbA1c	NonBrain	occipital_cortex	Tissue_Fantom60	Brain		DEL	0.0377673	0.0135023	0.00515652	0.0386596
HDL	NonBrain	occipital_cortex	Tissue_Fantom60	Brain		DEL	-0.0625636	0.0134636	3.37e-06	0.000111063
IGF1	NonBrain	occipital_cortex	Tissue_Fantom60	Brain		DEL	-0.00445289	0.0136711	0.74464	0.881671
LDL	NonBrain	occipital_cortex	Tissue_Fantom60	Brain		DEL	-0.0179192	0.0141359	0.204929	0.45102
Neuroticism	Brain	occipital_cortex	Tissue_Fantom60	Brain		DEL	0.0654871	0.0156022	2.7e-05	0.000618678
Platelet	NonBrain	occipital_cortex	Tissue_Fantom60	Brain		DEL	0.0209951	0.0135813	0.122133	0.329501
Reaction	Brain	occipital_cortex	Tissue_Fantom60	Brain		DEL	0.104945	0.0130085	7.2e-16	1.54e-13
Redblood	NonBrain	occipital_cortex	Tissue_Fantom60	Brain		DEL	0.0377065	0.0119276	0.00157091	0.0158182
StandingHeight	NonBrain	occipital_cortex	Tissue_Fantom60	Brain		DEL	-0.0850865	0.00969175	1.65e-18	5.31e-16
TDI	Brain	occipital_cortex	Tissue_Fantom60	Brain		DEL	0.0826957	0.0135449	1.03e-09	7.75e-08
Triglycerides	NonBrain	occipital_cortex	Tissue_Fantom60	Brain		DEL	0.0306909	0.0137464	0.0255723	0.119704
EA	Brain	occipital_cortex	Tissue_Fantom60	Brain		DEL	-0.0956256	0.01365	2.46e-12	3.12e-10
FI	Brain	occipital_cortex	Tissue_Fantom60	Brain		DEL	-0.137169	0.0177953	1.28e-14	2.15e-12
HeartRate	NonBrain	occipital_cortex	Tissue_Fantom60	Brain		DEL	0.0313338	0.0143078	0.0285261	0.127983
MET	NonBrain	occipital_cortex	Tissue_Fantom60	Brain		DEL	0.0396463	0.0164092	0.0156883	0.0859486
SexPartners	NonBrain	occipital_cortex	Tissue_Fantom60	Brain		DEL	-0.0415698	0.0145498	0.00427592	0.0334476
SymbolDigit	Brain	occipital_cortex	Tissue_Fantom60	Brain		DEL	-0.0614735	0.0226328	0.00660582	0.0459981
TrailMaking1	Brain	occipital_cortex	Tissue_Fantom60	Brain		DEL	0.0137636	0.0260366	0.597066	0.795649
TrailMaking2	Brain	occipital_cortex	Tissue_Fantom60	Brain		DEL	0.104685	0.0254192	3.82e-05	0.000829351
VSWM1	Brain	occipital_cortex	Tissue_Fantom60	Brain		DEL	0.0522447	0.0142173	0.000238122	0.00370378
VSWM2	Brain	occipital_cortex	Tissue_Fantom60	Brain		DEL	0.0755257	0.0135204	2.32e-08	1.37e-06
Menarche	NonBrain	occipital_cortex	Tissue_Fantom60	Brain		DEL	-0.0679745	0.019762	0.000582567	0.00748682
Menopause	NonBrain	occipital_cortex	Tissue_Fantom60	Brain		DEL	-0.00394706	0.0259413	0.879066	0.947225
Depression	Brain	occipital_cortex	Tissue_Fantom60	Brain		DEL	0.00431899	0.00322942	0.181097	0.416509
GP	Brain	occipital_cortex	Tissue_Fantom60	Brain		DEL	-0.00479012	0.00655775	0.465114	0.705349
MoodSwings	Brain	occipital_cortex	Tissue_Fantom60	Brain		DEL	0.109301	0.0288006	0.000145867	0.00247439
RiskTaking	Brain	occipital_cortex	Tissue_Fantom60	Brain		DEL	-0.14115	0.034837	4.22e-05	0.000894351
Loneliness	Brain	occipital_cortex	Tissue_Fantom60	Brain		DEL	0.161641	0.0334152	1.68e-06	6.13e-05
Irritability	Brain	occipital_cortex	Tissue_Fantom60	Brain		DEL	-0.00323711	0.0322054	0.919823	0.965971
Miserableness	Brain	occipital_cortex	Tissue_Fantom60	Brain		DEL	0.100153	0.0287662	0.0004986	0.00666242
Hypertention	NonBrain	occipital_cortex	Tissue_Fantom60	Brain		DEL	0.0397627	0.0322219	0.218019	0.467127
GuiltyFeelings	Brain	occipital_cortex	Tissue_Fantom60	Brain		DEL	0.0824911	0.0314148	0.008882	0.0573499
MoodAnxiety	Brain	occipital_cortex	Tissue_Fantom60	Brain		DEL	0.08971	0.0147806	1.28e-09	9.36e-08
Albumin	NonBrain	parietal_lobe	Tissue_Fantom60	Brain		DEL	-0.0369443	0.0131596	0.00499469	0.0376754
BirthWeight	NonBrain	parietal_lobe	Tissue_Fantom60	Brain		DEL	-0.0530462	0.0171347	0.00196279	0.0186232
BMD	NonBrain	parietal_lobe	Tissue_Fantom60	Brain		DEL	0.0543968	0.0164751	0.00096095	0.0109594
BMI	NonBrain	parietal_lobe	Tissue_Fantom60	Brain		DEL	0.0986831	0.0123869	1.63e-15	3.18e-13
Calcium	NonBrain	parietal_lobe	Tissue_Fantom60	Brain		DEL	-0.0135489	0.013343	0.309899	0.566956
Cholesterol	NonBrain	parietal_lobe	Tissue_Fantom60	Brain		DEL	-0.0385509	0.0125605	0.00214625	0.0197926
FEV1	NonBrain	parietal_lobe	Tissue_Fantom60	Brain		DEL	-0.0942696	0.00949745	3.24e-23	2.08e-20
FVC	NonBrain	parietal_lobe	Tissue_Fantom60	Brain		DEL	-0.103607	0.00920662	2.25e-29	6.65e-26
Gamma	NonBrain	parietal_lobe	Tissue_Fantom60	Brain		DEL	0.0397574	0.0119395	0.000868797	0.0101913
Glucose	NonBrain	parietal_lobe	Tissue_Fantom60	Brain		DEL	0.0379218	0.0133182	0.00440838	0.0342403
HbA1c	NonBrain	parietal_lobe	Tissue_Fantom60	Brain		DEL	0.0625903	0.0121617	2.66e-07	1.22e-05
HDL	NonBrain	parietal_lobe	Tissue_Fantom60	Brain		DEL	-0.0664863	0.0121427	4.37e-08	2.45e-06
IGF1	NonBrain	parietal_lobe	Tissue_Fantom60	Brain		DEL	-0.0289676	0.0123149	0.0186609	0.0966666
LDL	NonBrain	parietal_lobe	Tissue_Fantom60	Brain		DEL	-0.0280233	0.0127364	0.0277892	0.12617
Neuroticism	Brain	parietal_lobe	Tissue_Fantom60	Brain		DEL	0.0447133	0.0142468	0.00169837	0.0167818
Platelet	NonBrain	parietal_lobe	Tissue_Fantom60	Brain		DEL	0.0332148	0.0122731	0.00680383	0.0470511
Reaction	Brain	parietal_lobe	Tissue_Fantom60	Brain		DEL	0.0981476	0.0117525	6.77e-17	1.73e-14
Redblood	NonBrain	parietal_lobe	Tissue_Fantom60	Brain		DEL	0.0333555	0.0107795	0.00197256	0.01868
StandingHeight	NonBrain	parietal_lobe	Tissue_Fantom60	Brain		DEL	-0.104751	0.00870005	2.21e-33	2.35e-29
TDI	Brain	parietal_lobe	Tissue_Fantom60	Brain		DEL	0.0844733	0.0121699	3.89e-12	4.68e-10
Triglycerides	NonBrain	parietal_lobe	Tissue_Fantom60	Brain		DEL	0.0346892	0.0123897	0.00511319	0.0384516
EA	Brain	parietal_lobe	Tissue_Fantom60	Brain		DEL	-0.0983036	0.0122781	1.18e-15	2.4e-13
FI	Brain	parietal_lobe	Tissue_Fantom60	Brain		DEL	-0.0944975	0.0165865	1.22e-08	7.45e-07
HeartRate	NonBrain	parietal_lobe	Tissue_Fantom60	Brain		DEL	0.0419379	0.0129268	0.00117759	0.0128269
MET	NonBrain	parietal_lobe	Tissue_Fantom60	Brain		DEL	0.0202894	0.0151138	0.179456	0.413862
SexPartners	NonBrain	parietal_lobe	Tissue_Fantom60	Brain		DEL	-0.0451871	0.0134316	0.000767657	0.00923186
SymbolDigit	Brain	parietal_lobe	Tissue_Fantom60	Brain		DEL	-0.0631246	0.0218791	0.00391285	0.031269
TrailMaking1	Brain	parietal_lobe	Tissue_Fantom60	Brain		DEL	0.0205904	0.0252128	0.414123	0.664898
TrailMaking2	Brain	parietal_lobe	Tissue_Fantom60	Brain		DEL	0.0863317	0.0244039	0.0004039	0.0056537
VSWM1	Brain	parietal_lobe	Tissue_Fantom60	Brain		DEL	0.0396611	0.0128485	0.00202313	0.0189886
VSWM2	Brain	parietal_lobe	Tissue_Fantom60	Brain		DEL	0.0615812	0.0122736	5.24e-07	2.29e-05
Menarche	NonBrain	parietal_lobe	Tissue_Fantom60	Brain		DEL	-0.0661547	0.0181827	0.000274479	0.00416419
Menopause	NonBrain	parietal_lobe	Tissue_Fantom60	Brain		DEL	-0.023765	0.0248277	0.338469	0.595603
Depression	Brain	parietal_lobe	Tissue_Fantom60	Brain		DEL	-0.000222883	0.00290064	0.938752	0.973765
GP	Brain	parietal_lobe	Tissue_Fantom60	Brain		DEL	-0.0043426	0.00591355	0.462737	0.703402
MoodSwings	Brain	parietal_lobe	Tissue_Fantom60	Brain		DEL	0.0913642	0.0263084	0.000491859	0.00660217
RiskTaking	Brain	parietal_lobe	Tissue_Fantom60	Brain		DEL	-0.117991	0.0319902	0.000181751	0.00294142
Loneliness	Brain	parietal_lobe	Tissue_Fantom60	Brain		DEL	0.107559	0.0295708	0.00030856	0.00456879
Irritability	Brain	parietal_lobe	Tissue_Fantom60	Brain		DEL	3.54e-05	0.0289245	0.995352	0.997848
Miserableness	Brain	parietal_lobe	Tissue_Fantom60	Brain		DEL	0.0830592	0.0261498	0.0014627	0.0150252
Hypertention	NonBrain	parietal_lobe	Tissue_Fantom60	Brain		DEL	0.063807	0.0287812	0.0273322	0.12486
GuiltyFeelings	Brain	parietal_lobe	Tissue_Fantom60	Brain		DEL	0.0383997	0.0284713	0.178548	0.412944
MoodAnxiety	Brain	parietal_lobe	Tissue_Fantom60	Brain		DEL	0.0552143	0.0134069	3.82e-05	0.000829351
Albumin	NonBrain	thalamus	Tissue_Fantom60	Brain		DEL	-0.0237287	0.0114559	0.0383304	0.156065
BirthWeight	NonBrain	thalamus	Tissue_Fantom60	Brain		DEL	-0.0353118	0.0147887	0.016952	0.0905576
BMD	NonBrain	thalamus	Tissue_Fantom60	Brain		DEL	0.0206388	0.0137964	0.134667	0.3488
BMI	NonBrain	thalamus	Tissue_Fantom60	Brain		DEL	0.00887331	0.0108329	0.412728	0.663811
Calcium	NonBrain	thalamus	Tissue_Fantom60	Brain		DEL	0.00338371	0.011617	0.770843	0.893248
Cholesterol	NonBrain	thalamus	Tissue_Fantom60	Brain		DEL	-0.0267257	0.0109618	0.0147666	0.0825023
FEV1	NonBrain	thalamus	Tissue_Fantom60	Brain		DEL	-0.00827326	0.00833536	0.32093	0.577683
FVC	NonBrain	thalamus	Tissue_Fantom60	Brain		DEL	-0.01023	0.00808026	0.205499	0.451669
Gamma	NonBrain	thalamus	Tissue_Fantom60	Brain		DEL	0.0048278	0.010404	0.642625	0.82346
Glucose	NonBrain	thalamus	Tissue_Fantom60	Brain		DEL	0.0159726	0.0115438	0.166465	0.398632
HbA1c	NonBrain	thalamus	Tissue_Fantom60	Brain		DEL	0.0114774	0.010615	0.279586	0.534666
HDL	NonBrain	thalamus	Tissue_Fantom60	Brain		DEL	-0.0428912	0.0105717	4.97e-05	0.00102208
IGF1	NonBrain	thalamus	Tissue_Fantom60	Brain		DEL	-0.000247411	0.0107541	0.981645	0.992494
LDL	NonBrain	thalamus	Tissue_Fantom60	Brain		DEL	-0.0167146	0.0111196	0.132797	0.345711
Neuroticism	Brain	thalamus	Tissue_Fantom60	Brain		DEL	0.0539975	0.0121065	8.19e-06	0.000236617
Platelet	NonBrain	thalamus	Tissue_Fantom60	Brain		DEL	0.0103016	0.0107014	0.335729	0.593321
Reaction	Brain	thalamus	Tissue_Fantom60	Brain		DEL	0.0237226	0.0102256	0.0203455	0.102354
Redblood	NonBrain	thalamus	Tissue_Fantom60	Brain		DEL	-0.0175291	0.00939682	0.0621223	0.213949
StandingHeight	NonBrain	thalamus	Tissue_Fantom60	Brain		DEL	-0.00308999	0.00763863	0.68583	0.846429
TDI	Brain	thalamus	Tissue_Fantom60	Brain		DEL	0.0372654	0.0106657	0.000476004	0.00644273
Triglycerides	NonBrain	thalamus	Tissue_Fantom60	Brain		DEL	0.0177191	0.0108061	0.101062	0.292774
EA	Brain	thalamus	Tissue_Fantom60	Brain		DEL	-0.0463333	0.0107392	1.6e-05	0.000404739
FI	Brain	thalamus	Tissue_Fantom60	Brain		DEL	-0.0543095	0.0139147	9.5e-05	0.00173773
HeartRate	NonBrain	thalamus	Tissue_Fantom60	Brain		DEL	0.0159019	0.0112636	0.158014	0.386018
MET	NonBrain	thalamus	Tissue_Fantom60	Brain		DEL	-0.00451202	0.0127022	0.722428	0.867453
SexPartners	NonBrain	thalamus	Tissue_Fantom60	Brain		DEL	0.000642728	0.0112508	0.954444	0.981107
SymbolDigit	Brain	thalamus	Tissue_Fantom60	Brain		DEL	-0.0376144	0.0173325	0.0299955	0.132408
TrailMaking1	Brain	thalamus	Tissue_Fantom60	Brain		DEL	0.0164654	0.0198219	0.406163	0.658154
TrailMaking2	Brain	thalamus	Tissue_Fantom60	Brain		DEL	0.0397554	0.0193906	0.0403431	0.161024
VSWM1	Brain	thalamus	Tissue_Fantom60	Brain		DEL	0.0106393	0.0111868	0.341573	0.598497
VSWM2	Brain	thalamus	Tissue_Fantom60	Brain		DEL	0.0158485	0.0106234	0.13574	0.350414
Menarche	NonBrain	thalamus	Tissue_Fantom60	Brain		DEL	0.018417	0.0152998	0.22869	0.479163
Menopause	NonBrain	thalamus	Tissue_Fantom60	Brain		DEL	-0.0307615	0.0199992	0.124018	0.33258
Depression	Brain	thalamus	Tissue_Fantom60	Brain		DEL	0.00338378	0.00254376	0.183444	0.420307
GP	Brain	thalamus	Tissue_Fantom60	Brain		DEL	0.0019918	0.00516546	0.699793	0.855125
MoodSwings	Brain	thalamus	Tissue_Fantom60	Brain		DEL	0.0843435	0.0225024	0.000177105	0.00290115
RiskTaking	Brain	thalamus	Tissue_Fantom60	Brain		DEL	-0.0934921	0.0270521	0.000487311	0.00654705
Loneliness	Brain	thalamus	Tissue_Fantom60	Brain		DEL	0.114268	0.0268217	2.52e-05	0.000584923
Irritability	Brain	thalamus	Tissue_Fantom60	Brain		DEL	0.0312846	0.0250384	0.212526	0.460627
Miserableness	Brain	thalamus	Tissue_Fantom60	Brain		DEL	0.134323	0.0225679	2.64e-09	1.85e-07
Hypertention	NonBrain	thalamus	Tissue_Fantom60	Brain		DEL	-0.0224667	0.0257199	0.38141	0.634054
GuiltyFeelings	Brain	thalamus	Tissue_Fantom60	Brain		DEL	0.0831425	0.0244883	0.000733864	0.00888324
MoodAnxiety	Brain	thalamus	Tissue_Fantom60	Brain		DEL	0.0759814	0.0116203	6.21e-11	5.78e-09
Albumin	NonBrain	urinary_bladder	Tissue_Fantom60	NonBrain		DEL	-0.00970598	0.0150974	0.520296	0.748951
BirthWeight	NonBrain	urinary_bladder	Tissue_Fantom60	NonBrain		DEL	0.0141422	0.0191874	0.461087	0.70215
BMD	NonBrain	urinary_bladder	Tissue_Fantom60	NonBrain		DEL	-0.0344468	0.0184003	0.061196	0.212142
BMI	NonBrain	urinary_bladder	Tissue_Fantom60	NonBrain		DEL	0.0259963	0.0141791	0.0667403	0.223926
Calcium	NonBrain	urinary_bladder	Tissue_Fantom60	NonBrain		DEL	-0.0118815	0.0153136	0.43782	0.68394
Cholesterol	NonBrain	urinary_bladder	Tissue_Fantom60	NonBrain		DEL	-0.0105488	0.0143877	0.463448	0.704025
FEV1	NonBrain	urinary_bladder	Tissue_Fantom60	NonBrain		DEL	-0.062601	0.010855	8.07e-09	5.13e-07
FVC	NonBrain	urinary_bladder	Tissue_Fantom60	NonBrain		DEL	-0.0652003	0.0105227	5.79e-10	4.58e-08
Gamma	NonBrain	urinary_bladder	Tissue_Fantom60	NonBrain		DEL	0.0120539	0.0136619	0.377615	0.63147
Glucose	NonBrain	urinary_bladder	Tissue_Fantom60	NonBrain		DEL	0.0333611	0.0151733	0.0279021	0.126472
HbA1c	NonBrain	urinary_bladder	Tissue_Fantom60	NonBrain		DEL	0.00457033	0.013922	0.742698	0.880372
HDL	NonBrain	urinary_bladder	Tissue_Fantom60	NonBrain		DEL	-0.0170161	0.0139314	0.221926	0.470912
IGF1	NonBrain	urinary_bladder	Tissue_Fantom60	NonBrain		DEL	-0.00599888	0.0141103	0.670733	0.838813
LDL	NonBrain	urinary_bladder	Tissue_Fantom60	NonBrain		DEL	-0.0102152	0.0145878	0.483768	0.72075
Neuroticism	Brain	urinary_bladder	Tissue_Fantom60	NonBrain		DEL	0.0238813	0.0158429	0.131714	0.343922
Platelet	NonBrain	urinary_bladder	Tissue_Fantom60	NonBrain		DEL	-0.0027078	0.0139754	0.846368	0.93208
Reaction	Brain	urinary_bladder	Tissue_Fantom60	NonBrain		DEL	0.0242372	0.0134408	0.0713481	0.233957
Redblood	NonBrain	urinary_bladder	Tissue_Fantom60	NonBrain		DEL	0.0218206	0.0122748	0.0754573	0.242522
StandingHeight	NonBrain	urinary_bladder	Tissue_Fantom60	NonBrain		DEL	-0.0703282	0.00999425	1.97e-12	2.58e-10
TDI	Brain	urinary_bladder	Tissue_Fantom60	NonBrain		DEL	0.0326489	0.0139755	0.0194841	0.0996573
Triglycerides	NonBrain	urinary_bladder	Tissue_Fantom60	NonBrain		DEL	0.0139439	0.0141854	0.325618	0.582552
EA	Brain	urinary_bladder	Tissue_Fantom60	NonBrain		DEL	-0.0501303	0.0141042	0.000379072	0.0053682
FI	Brain	urinary_bladder	Tissue_Fantom60	NonBrain		DEL	-0.0773849	0.0189786	4.55e-05	0.000955439
HeartRate	NonBrain	urinary_bladder	Tissue_Fantom60	NonBrain		DEL	0.0370373	0.0147789	0.0122077	0.0721154
MET	NonBrain	urinary_bladder	Tissue_Fantom60	NonBrain		DEL	-0.0195434	0.0167572	0.243506	0.495005
SexPartners	NonBrain	urinary_bladder	Tissue_Fantom60	NonBrain		DEL	-0.0265411	0.014934	0.0755318	0.242567
SymbolDigit	Brain	urinary_bladder	Tissue_Fantom60	NonBrain		DEL	0.00724181	0.0251496	0.773386	0.894657
TrailMaking1	Brain	urinary_bladder	Tissue_Fantom60	NonBrain		DEL	0.0146109	0.0286442	0.609994	0.802404
TrailMaking2	Brain	urinary_bladder	Tissue_Fantom60	NonBrain		DEL	0.0188171	0.0282221	0.504932	0.737499
VSWM1	Brain	urinary_bladder	Tissue_Fantom60	NonBrain		DEL	0.0195167	0.0147222	0.184951	0.422387
VSWM2	Brain	urinary_bladder	Tissue_Fantom60	NonBrain		DEL	0.028849	0.0139769	0.039014	0.158108
Menarche	NonBrain	urinary_bladder	Tissue_Fantom60	NonBrain		DEL	-0.0357526	0.0198417	0.0715643	0.234199
Menopause	NonBrain	urinary_bladder	Tissue_Fantom60	NonBrain		DEL	0.00764081	0.0269854	0.777065	0.896945
Depression	Brain	urinary_bladder	Tissue_Fantom60	NonBrain		DEL	0.00461357	0.00333209	0.166179	0.398467
GP	Brain	urinary_bladder	Tissue_Fantom60	NonBrain		DEL	0.00717874	0.00676834	0.288857	0.545065
MoodSwings	Brain	urinary_bladder	Tissue_Fantom60	NonBrain		DEL	0.0268962	0.0296013	0.363147	0.617789
RiskTaking	Brain	urinary_bladder	Tissue_Fantom60	NonBrain		DEL	-0.0416303	0.0352658	0.234913	0.485307
Loneliness	Brain	urinary_bladder	Tissue_Fantom60	NonBrain		DEL	0.039638	0.0346075	0.254404	0.507777
Irritability	Brain	urinary_bladder	Tissue_Fantom60	NonBrain		DEL	0.0213193	0.032726	0.515469	0.745338
Miserableness	Brain	urinary_bladder	Tissue_Fantom60	NonBrain		DEL	-0.0264811	0.0297219	0.372424	0.626366
Hypertention	NonBrain	urinary_bladder	Tissue_Fantom60	NonBrain		DEL	0.0476516	0.0333931	0.155463	0.382376
GuiltyFeelings	Brain	urinary_bladder	Tissue_Fantom60	NonBrain		DEL	0.0390845	0.0321523	0.225663	0.475627
MoodAnxiety	Brain	urinary_bladder	Tissue_Fantom60	NonBrain		DEL	0.0146495	0.015342	0.339647	0.596766
Albumin	NonBrain	prostate	Tissue_Fantom60	NonBrain		DEL	0.00708384	0.0115957	0.541264	0.762256
BirthWeight	NonBrain	prostate	Tissue_Fantom60	NonBrain		DEL	0.00239193	0.0146208	0.870048	0.94353
BMD	NonBrain	prostate	Tissue_Fantom60	NonBrain		DEL	0.00569546	0.0142175	0.68872	0.848019
BMI	NonBrain	prostate	Tissue_Fantom60	NonBrain		DEL	0.0102352	0.0109715	0.350878	0.60664
Calcium	NonBrain	prostate	Tissue_Fantom60	NonBrain		DEL	0.00830425	0.0117577	0.480013	0.718645
Cholesterol	NonBrain	prostate	Tissue_Fantom60	NonBrain		DEL	0.00358532	0.011123	0.747201	0.882302
FEV1	NonBrain	prostate	Tissue_Fantom60	NonBrain		DEL	-0.00397678	0.00847594	0.638938	0.820699
FVC	NonBrain	prostate	Tissue_Fantom60	NonBrain		DEL	-0.0057011	0.00821709	0.487801	0.724123
Gamma	NonBrain	prostate	Tissue_Fantom60	NonBrain		DEL	-0.00475643	0.0105643	0.652541	0.828823
Glucose	NonBrain	prostate	Tissue_Fantom60	NonBrain		DEL	0.0242778	0.0116652	0.0374142	0.153603
HbA1c	NonBrain	prostate	Tissue_Fantom60	NonBrain		DEL	-0.0144559	0.0107694	0.179497	0.413889
HDL	NonBrain	prostate	Tissue_Fantom60	NonBrain		DEL	-0.0132583	0.0106993	0.215281	0.464136
IGF1	NonBrain	prostate	Tissue_Fantom60	NonBrain		DEL	0.00785617	0.0109109	0.471506	0.711235
LDL	NonBrain	prostate	Tissue_Fantom60	NonBrain		DEL	0.00789284	0.0112834	0.484236	0.721331
Neuroticism	Brain	prostate	Tissue_Fantom60	NonBrain		DEL	0.00695557	0.0122029	0.568683	0.780123
Platelet	NonBrain	prostate	Tissue_Fantom60	NonBrain		DEL	-0.041259	0.0108768	0.000148675	0.00251337
Reaction	Brain	prostate	Tissue_Fantom60	NonBrain		DEL	-0.00841505	0.0104025	0.418548	0.668496
Redblood	NonBrain	prostate	Tissue_Fantom60	NonBrain		DEL	0.0132101	0.00955256	0.166699	0.398869
StandingHeight	NonBrain	prostate	Tissue_Fantom60	NonBrain		DEL	-0.00392548	0.00773748	0.611922	0.803154
TDI	Brain	prostate	Tissue_Fantom60	NonBrain		DEL	0.00706827	0.0108181	0.513516	0.744699
Triglycerides	NonBrain	prostate	Tissue_Fantom60	NonBrain		DEL	0.00470446	0.0109716	0.668081	0.837408
EA	Brain	prostate	Tissue_Fantom60	NonBrain		DEL	-0.00769514	0.0109327	0.481517	0.719672
FI	Brain	prostate	Tissue_Fantom60	NonBrain		DEL	-0.0104525	0.0140476	0.45683	0.699179
HeartRate	NonBrain	prostate	Tissue_Fantom60	NonBrain		DEL	0.0092199	0.0114103	0.41907	0.668496
MET	NonBrain	prostate	Tissue_Fantom60	NonBrain		DEL	-0.0171663	0.012847	0.181481	0.416973
SexPartners	NonBrain	prostate	Tissue_Fantom60	NonBrain		DEL	0.00365329	0.0113969	0.748552	0.88291
SymbolDigit	Brain	prostate	Tissue_Fantom60	NonBrain		DEL	0.0172133	0.0181393	0.342649	0.599802
TrailMaking1	Brain	prostate	Tissue_Fantom60	NonBrain		DEL	-0.0120211	0.0207664	0.562675	0.777042
TrailMaking2	Brain	prostate	Tissue_Fantom60	NonBrain		DEL	-0.00461383	0.0202602	0.819858	0.918639
VSWM1	Brain	prostate	Tissue_Fantom60	NonBrain		DEL	0.0105303	0.0114321	0.356988	0.611744
VSWM2	Brain	prostate	Tissue_Fantom60	NonBrain		DEL	0.00707438	0.010812	0.512914	0.744315
Menarche	NonBrain	prostate	Tissue_Fantom60	NonBrain		DEL	-0.00955583	0.0156436	0.541302	0.762256
Menopause	NonBrain	prostate	Tissue_Fantom60	NonBrain		DEL	-0.000956638	0.0208649	0.963431	0.98487
Depression	Brain	prostate	Tissue_Fantom60	NonBrain		DEL	0.00290306	0.0025799	0.26048	0.514711
GP	Brain	prostate	Tissue_Fantom60	NonBrain		DEL	0.00112894	0.00524116	0.829456	0.923485
MoodSwings	Brain	prostate	Tissue_Fantom60	NonBrain		DEL	-0.00481866	0.0229045	0.833306	0.925252
RiskTaking	Brain	prostate	Tissue_Fantom60	NonBrain		DEL	-0.0400879	0.0269193	0.134596	0.348676
Loneliness	Brain	prostate	Tissue_Fantom60	NonBrain		DEL	0.00823006	0.0278534	0.767782	0.89181
Irritability	Brain	prostate	Tissue_Fantom60	NonBrain		DEL	0.023276	0.0253359	0.359137	0.613516
Miserableness	Brain	prostate	Tissue_Fantom60	NonBrain		DEL	-0.00254169	0.023054	0.912171	0.961916
Hypertention	NonBrain	prostate	Tissue_Fantom60	NonBrain		DEL	0.0139866	0.0259398	0.59012	0.792906
GuiltyFeelings	Brain	prostate	Tissue_Fantom60	NonBrain		DEL	0.0124574	0.0252071	0.62148	0.809166
MoodAnxiety	Brain	prostate	Tissue_Fantom60	NonBrain		DEL	-0.00400742	0.0118137	0.734445	0.875763
Albumin	NonBrain	insular_cortex	Tissue_Fantom60	Brain		DEL	-0.0541597	0.01471	0.000231595	0.00362996
BirthWeight	NonBrain	insular_cortex	Tissue_Fantom60	Brain		DEL	-0.044697	0.01919	0.0198502	0.100729
BMD	NonBrain	insular_cortex	Tissue_Fantom60	Brain		DEL	-0.0140556	0.0188851	0.456715	0.699179
BMI	NonBrain	insular_cortex	Tissue_Fantom60	Brain		DEL	0.132645	0.013872	1.16e-21	5.92e-19
Calcium	NonBrain	insular_cortex	Tissue_Fantom60	Brain		DEL	-0.0359132	0.0149123	0.0160276	0.0872581
Cholesterol	NonBrain	insular_cortex	Tissue_Fantom60	Brain		DEL	-0.0444106	0.0140311	0.00155015	0.0156518
FEV1	NonBrain	insular_cortex	Tissue_Fantom60	Brain		DEL	-0.117667	0.0106416	2.04e-28	4.31e-25
FVC	NonBrain	insular_cortex	Tissue_Fantom60	Brain		DEL	-0.123897	0.0103157	3.17e-33	2.35e-29
Gamma	NonBrain	insular_cortex	Tissue_Fantom60	Brain		DEL	0.0771433	0.0133574	7.69e-09	4.94e-07
Glucose	NonBrain	insular_cortex	Tissue_Fantom60	Brain		DEL	0.0336816	0.0149109	0.0238933	0.114398
HbA1c	NonBrain	insular_cortex	Tissue_Fantom60	Brain		DEL	0.0882307	0.0136018	8.78e-11	8.02e-09
HDL	NonBrain	insular_cortex	Tissue_Fantom60	Brain		DEL	-0.0621083	0.0135722	4.74e-06	0.000147853
IGF1	NonBrain	insular_cortex	Tissue_Fantom60	Brain		DEL	-0.0527292	0.013751	0.000125809	0.00218167
LDL	NonBrain	insular_cortex	Tissue_Fantom60	Brain		DEL	-0.0397374	0.0142425	0.00527018	0.0393719
Neuroticism	Brain	insular_cortex	Tissue_Fantom60	Brain		DEL	0.0347683	0.0161014	0.030825	0.134564
Platelet	NonBrain	insular_cortex	Tissue_Fantom60	Brain		DEL	0.0271037	0.0137238	0.048275	0.181102
Reaction	Brain	insular_cortex	Tissue_Fantom60	Brain		DEL	0.0648575	0.0131467	8.08e-07	3.37e-05
Redblood	NonBrain	insular_cortex	Tissue_Fantom60	Brain		DEL	0.00824701	0.0120545	0.493885	0.729606
StandingHeight	NonBrain	insular_cortex	Tissue_Fantom60	Brain		DEL	-0.0751037	0.00972173	1.12e-14	1.92e-12
TDI	Brain	insular_cortex	Tissue_Fantom60	Brain		DEL	0.0961359	0.0135894	1.5e-12	2.04e-10
Triglycerides	NonBrain	insular_cortex	Tissue_Fantom60	Brain		DEL	0.0484327	0.0138585	0.000474481	0.0064372
EA	Brain	insular_cortex	Tissue_Fantom60	Brain		DEL	-0.0795544	0.0137266	6.81e-09	4.44e-07
FI	Brain	insular_cortex	Tissue_Fantom60	Brain		DEL	-0.0435095	0.0188463	0.0209639	0.10434
HeartRate	NonBrain	insular_cortex	Tissue_Fantom60	Brain		DEL	0.04346	0.0144808	0.00268919	0.0236188
MET	NonBrain	insular_cortex	Tissue_Fantom60	Brain		DEL	-0.0378898	0.0169978	0.0258079	0.120421
SexPartners	NonBrain	insular_cortex	Tissue_Fantom60	Brain		DEL	-0.0407408	0.0151848	0.00729675	0.0493677
SymbolDigit	Brain	insular_cortex	Tissue_Fantom60	Brain		DEL	-0.0317022	0.0250548	0.205762	0.451845
TrailMaking1	Brain	insular_cortex	Tissue_Fantom60	Brain		DEL	-0.00920995	0.028971	0.75056	0.883831
TrailMaking2	Brain	insular_cortex	Tissue_Fantom60	Brain		DEL	0.0232531	0.0280193	0.406599	0.658188
VSWM1	Brain	insular_cortex	Tissue_Fantom60	Brain		DEL	0.0286751	0.0144295	0.0468952	0.177546
VSWM2	Brain	insular_cortex	Tissue_Fantom60	Brain		DEL	0.0182859	0.0137578	0.183806	0.420875
Menarche	NonBrain	insular_cortex	Tissue_Fantom60	Brain		DEL	-0.0636446	0.0206951	0.00210286	0.0195331
Menopause	NonBrain	insular_cortex	Tissue_Fantom60	Brain		DEL	-0.0629703	0.0296716	0.0338193	0.143504
Depression	Brain	insular_cortex	Tissue_Fantom60	Brain		DEL	0.00410003	0.00323967	0.205668	0.451811
GP	Brain	insular_cortex	Tissue_Fantom60	Brain		DEL	0.00215944	0.00662121	0.744319	0.881502
MoodSwings	Brain	insular_cortex	Tissue_Fantom60	Brain		DEL	0.0688363	0.029605	0.0195639	0.0998716
RiskTaking	Brain	insular_cortex	Tissue_Fantom60	Brain		DEL	-0.0346499	0.0349973	0.31931	0.576497
Loneliness	Brain	insular_cortex	Tissue_Fantom60	Brain		DEL	0.0961518	0.032686	0.00354674	0.0290495
Irritability	Brain	insular_cortex	Tissue_Fantom60	Brain		DEL	0.0371974	0.0319588	0.245838	0.49795
Miserableness	Brain	insular_cortex	Tissue_Fantom60	Brain		DEL	0.0219589	0.0292729	0.452719	0.696298
Hypertention	NonBrain	insular_cortex	Tissue_Fantom60	Brain		DEL	0.0739865	0.0320165	0.0217544	0.106979
GuiltyFeelings	Brain	insular_cortex	Tissue_Fantom60	Brain		DEL	0.0523131	0.0317878	0.101448	0.293663
MoodAnxiety	Brain	insular_cortex	Tissue_Fantom60	Brain		DEL	0.0408058	0.0149693	0.00641157	0.0452049
Albumin	NonBrain	medial_frontal_gyrus	Tissue_Fantom60	Brain		DEL	-0.055774	0.0139921	6.72e-05	0.00130577
BirthWeight	NonBrain	medial_frontal_gyrus	Tissue_Fantom60	Brain		DEL	-0.0153076	0.0181445	0.398864	0.650854
BMD	NonBrain	medial_frontal_gyrus	Tissue_Fantom60	Brain		DEL	-0.0122366	0.0176377	0.487824	0.724123
BMI	NonBrain	medial_frontal_gyrus	Tissue_Fantom60	Brain		DEL	0.1101	0.0131893	6.99e-17	1.75e-14
Calcium	NonBrain	medial_frontal_gyrus	Tissue_Fantom60	Brain		DEL	-0.0179451	0.014187	0.205908	0.4521
Cholesterol	NonBrain	medial_frontal_gyrus	Tissue_Fantom60	Brain		DEL	-0.0234697	0.0133498	0.0787381	0.249738
FEV1	NonBrain	medial_frontal_gyrus	Tissue_Fantom60	Brain		DEL	-0.10059	0.0101335	3.22e-23	2.08e-20
FVC	NonBrain	medial_frontal_gyrus	Tissue_Fantom60	Brain		DEL	-0.105357	0.00982332	7.82e-27	1.16e-23
Gamma	NonBrain	medial_frontal_gyrus	Tissue_Fantom60	Brain		DEL	0.0581554	0.0126925	4.61e-06	0.00014476
Glucose	NonBrain	medial_frontal_gyrus	Tissue_Fantom60	Brain		DEL	0.0406447	0.0141728	0.00413351	0.0325401
HbA1c	NonBrain	medial_frontal_gyrus	Tissue_Fantom60	Brain		DEL	0.089025	0.0129505	6.24e-12	6.99e-10
HDL	NonBrain	medial_frontal_gyrus	Tissue_Fantom60	Brain		DEL	-0.0522148	0.0129098	5.24e-05	0.00107254
IGF1	NonBrain	medial_frontal_gyrus	Tissue_Fantom60	Brain		DEL	-0.0554094	0.013087	2.3e-05	0.000542758
LDL	NonBrain	medial_frontal_gyrus	Tissue_Fantom60	Brain		DEL	-0.0158998	0.0135384	0.240227	0.491485
Neuroticism	Brain	medial_frontal_gyrus	Tissue_Fantom60	Brain		DEL	0.0222501	0.0153051	0.14601	0.367309
Platelet	NonBrain	medial_frontal_gyrus	Tissue_Fantom60	Brain		DEL	0.037179	0.0130625	0.00442425	0.0342831
Reaction	Brain	medial_frontal_gyrus	Tissue_Fantom60	Brain		DEL	0.0628453	0.0125145	5.12e-07	2.25e-05
Redblood	NonBrain	medial_frontal_gyrus	Tissue_Fantom60	Brain		DEL	0.0117909	0.011473	0.304088	0.560497
StandingHeight	NonBrain	medial_frontal_gyrus	Tissue_Fantom60	Brain		DEL	-0.0638987	0.00925516	5.06e-12	5.94e-10
TDI	Brain	medial_frontal_gyrus	Tissue_Fantom60	Brain		DEL	0.0834546	0.012935	1.11e-10	9.92e-09
Triglycerides	NonBrain	medial_frontal_gyrus	Tissue_Fantom60	Brain		DEL	0.0453659	0.0131731	0.000573589	0.00739835
EA	Brain	medial_frontal_gyrus	Tissue_Fantom60	Brain		DEL	-0.0772167	0.0130595	3.37e-09	2.34e-07
FI	Brain	medial_frontal_gyrus	Tissue_Fantom60	Brain		DEL	-0.0313011	0.017887	0.0801307	0.252513
HeartRate	NonBrain	medial_frontal_gyrus	Tissue_Fantom60	Brain		DEL	0.0435705	0.0138101	0.0016052	0.0160868
MET	NonBrain	medial_frontal_gyrus	Tissue_Fantom60	Brain		DEL	-0.019149	0.0162676	0.239146	0.490155
SexPartners	NonBrain	medial_frontal_gyrus	Tissue_Fantom60	Brain		DEL	-0.0290807	0.0143915	0.0433128	0.167964
SymbolDigit	Brain	medial_frontal_gyrus	Tissue_Fantom60	Brain		DEL	0.0056961	0.0234993	0.808475	0.913199
TrailMaking1	Brain	medial_frontal_gyrus	Tissue_Fantom60	Brain		DEL	-0.0142145	0.0273134	0.602771	0.798155
TrailMaking2	Brain	medial_frontal_gyrus	Tissue_Fantom60	Brain		DEL	0.0075757	0.0262796	0.773138	0.894657
VSWM1	Brain	medial_frontal_gyrus	Tissue_Fantom60	Brain		DEL	0.0345363	0.0137542	0.0120408	0.0713848
VSWM2	Brain	medial_frontal_gyrus	Tissue_Fantom60	Brain		DEL	0.0329158	0.0130975	0.011967	0.0711479
Menarche	NonBrain	medial_frontal_gyrus	Tissue_Fantom60	Brain		DEL	-0.0654136	0.0194028	0.00074815	0.00904137
Menopause	NonBrain	medial_frontal_gyrus	Tissue_Fantom60	Brain		DEL	-0.0260973	0.0270585	0.334809	0.592404
Depression	Brain	medial_frontal_gyrus	Tissue_Fantom60	Brain		DEL	0.00425247	0.00308408	0.167944	0.400583
GP	Brain	medial_frontal_gyrus	Tissue_Fantom60	Brain		DEL	-0.00132756	0.00629566	0.83299	0.925252
MoodSwings	Brain	medial_frontal_gyrus	Tissue_Fantom60	Brain		DEL	0.0444185	0.0280015	0.11196	0.312569
RiskTaking	Brain	medial_frontal_gyrus	Tissue_Fantom60	Brain		DEL	-0.0561609	0.0335828	0.0918426	0.275621
Loneliness	Brain	medial_frontal_gyrus	Tissue_Fantom60	Brain		DEL	0.0933795	0.0312287	0.00301847	0.025779
Irritability	Brain	medial_frontal_gyrus	Tissue_Fantom60	Brain		DEL	0.0175056	0.0306803	0.568628	0.780123
Miserableness	Brain	medial_frontal_gyrus	Tissue_Fantom60	Brain		DEL	0.0174781	0.0278313	0.529699	0.756011
Hypertention	NonBrain	medial_frontal_gyrus	Tissue_Fantom60	Brain		DEL	0.058376	0.0305532	0.0573258	0.203387
GuiltyFeelings	Brain	medial_frontal_gyrus	Tissue_Fantom60	Brain		DEL	0.0413058	0.0302778	0.173923	0.407713
MoodAnxiety	Brain	medial_frontal_gyrus	Tissue_Fantom60	Brain		DEL	0.0325078	0.0141999	0.0220622	0.108132
Albumin	NonBrain	cerebellum	Tissue_Fantom60	Brain		DEL	-0.00990337	0.0109539	0.365944	0.62005
BirthWeight	NonBrain	cerebellum	Tissue_Fantom60	Brain		DEL	0.0131465	0.0137756	0.339917	0.59685
BMD	NonBrain	cerebellum	Tissue_Fantom60	Brain		DEL	0.0119565	0.0134432	0.373787	0.627447
BMI	NonBrain	cerebellum	Tissue_Fantom60	Brain		DEL	0.0401662	0.010275	9.26e-05	0.00170662
Calcium	NonBrain	cerebellum	Tissue_Fantom60	Brain		DEL	0.00496469	0.0111103	0.654981	0.829991
Cholesterol	NonBrain	cerebellum	Tissue_Fantom60	Brain		DEL	-0.0125718	0.0104814	0.230359	0.481009
FEV1	NonBrain	cerebellum	Tissue_Fantom60	Brain		DEL	-0.0204582	0.00788133	0.00943801	0.0597889
FVC	NonBrain	cerebellum	Tissue_Fantom60	Brain		DEL	-0.0231323	0.00764164	0.00246893	0.0220484
Gamma	NonBrain	cerebellum	Tissue_Fantom60	Brain		DEL	0.0256344	0.00996152	0.0100726	0.0628136
Glucose	NonBrain	cerebellum	Tissue_Fantom60	Brain		DEL	0.0153472	0.0110485	0.164812	0.396665
HbA1c	NonBrain	cerebellum	Tissue_Fantom60	Brain		DEL	0.0170151	0.0100682	0.0910304	0.274296
HDL	NonBrain	cerebellum	Tissue_Fantom60	Brain		DEL	-0.0214532	0.0101108	0.0338545	0.14353
IGF1	NonBrain	cerebellum	Tissue_Fantom60	Brain		DEL	-0.0195033	0.0103046	0.0584013	0.205782
LDL	NonBrain	cerebellum	Tissue_Fantom60	Brain		DEL	-0.00693494	0.0106296	0.514134	0.74501
Neuroticism	Brain	cerebellum	Tissue_Fantom60	Brain		DEL	-0.00211974	0.0114327	0.852908	0.93513
Platelet	NonBrain	cerebellum	Tissue_Fantom60	Brain		DEL	0.0194509	0.0101737	0.0558913	0.200128
Reaction	Brain	cerebellum	Tissue_Fantom60	Brain		DEL	-0.0235288	0.00971404	0.0154296	0.0850352
Redblood	NonBrain	cerebellum	Tissue_Fantom60	Brain		DEL	0.0038123	0.00893548	0.669636	0.83815
StandingHeight	NonBrain	cerebellum	Tissue_Fantom60	Brain		DEL	-0.000551583	0.00723535	0.939233	0.973833
TDI	Brain	cerebellum	Tissue_Fantom60	Brain		DEL	0.0254786	0.0101168	0.0117882	0.0703391
Triglycerides	NonBrain	cerebellum	Tissue_Fantom60	Brain		DEL	0.0229111	0.0103373	0.0266674	0.122657
EA	Brain	cerebellum	Tissue_Fantom60	Brain		DEL	0.00346059	0.0101984	0.734364	0.875743
FI	Brain	cerebellum	Tissue_Fantom60	Brain		DEL	0.00676205	0.0130547	0.604473	0.799292
HeartRate	NonBrain	cerebellum	Tissue_Fantom60	Brain		DEL	0.0305698	0.0107683	0.00452754	0.0348809
MET	NonBrain	cerebellum	Tissue_Fantom60	Brain		DEL	-0.0207168	0.0119542	0.0830942	0.258405
SexPartners	NonBrain	cerebellum	Tissue_Fantom60	Brain		DEL	0.0274024	0.0107458	0.0107708	0.0657689
SymbolDigit	Brain	cerebellum	Tissue_Fantom60	Brain		DEL	0.00951163	0.0166194	0.567105	0.779691
TrailMaking1	Brain	cerebellum	Tissue_Fantom60	Brain		DEL	-0.00190598	0.0190358	0.920244	0.966135
TrailMaking2	Brain	cerebellum	Tissue_Fantom60	Brain		DEL	-0.00904576	0.0184397	0.62374	0.810329
VSWM1	Brain	cerebellum	Tissue_Fantom60	Brain		DEL	0.00378234	0.0106241	0.721829	0.867156
VSWM2	Brain	cerebellum	Tissue_Fantom60	Brain		DEL	-0.00896058	0.0100811	0.374085	0.62778
Menarche	NonBrain	cerebellum	Tissue_Fantom60	Brain		DEL	-0.0230591	0.0142318	0.105178	0.300695
Menopause	NonBrain	cerebellum	Tissue_Fantom60	Brain		DEL	-0.0230719	0.0191443	0.228147	0.478748
Depression	Brain	cerebellum	Tissue_Fantom60	Brain		DEL	-0.00215578	0.0024122	0.371483	0.625638
GP	Brain	cerebellum	Tissue_Fantom60	Brain		DEL	0.000432476	0.00489451	0.929591	0.970551
MoodSwings	Brain	cerebellum	Tissue_Fantom60	Brain		DEL	0.000172852	0.0213959	0.993441	0.997128
RiskTaking	Brain	cerebellum	Tissue_Fantom60	Brain		DEL	0.0427771	0.0248215	0.0862401	0.265176
Loneliness	Brain	cerebellum	Tissue_Fantom60	Brain		DEL	0.0246387	0.0257546	0.340041	0.596948
Irritability	Brain	cerebellum	Tissue_Fantom60	Brain		DEL	0.00661786	0.0238606	0.781579	0.8987
Miserableness	Brain	cerebellum	Tissue_Fantom60	Brain		DEL	0.033683	0.0214845	0.116856	0.321051
Hypertention	NonBrain	cerebellum	Tissue_Fantom60	Brain		DEL	-0.0476258	0.024711	0.0526487	0.192244
GuiltyFeelings	Brain	cerebellum	Tissue_Fantom60	Brain		DEL	0.0320065	0.0233733	0.171945	0.40544
MoodAnxiety	Brain	cerebellum	Tissue_Fantom60	Brain		DEL	0.00174826	0.011056	0.874357	0.945361
Albumin	NonBrain	substantia_nigra	Tissue_Fantom60	Brain		DEL	-0.00482361	0.0121328	0.69095	0.849654
BirthWeight	NonBrain	substantia_nigra	Tissue_Fantom60	Brain		DEL	-0.053707	0.0154989	0.000529921	0.00698005
BMD	NonBrain	substantia_nigra	Tissue_Fantom60	Brain		DEL	0.0372104	0.0145705	0.0106555	0.0651958
BMI	NonBrain	substantia_nigra	Tissue_Fantom60	Brain		DEL	0.00746362	0.0114732	0.515352	0.745316
Calcium	NonBrain	substantia_nigra	Tissue_Fantom60	Brain		DEL	0.0144731	0.0123013	0.239375	0.490489
Cholesterol	NonBrain	substantia_nigra	Tissue_Fantom60	Brain		DEL	-0.0144148	0.0116011	0.214039	0.462596
FEV1	NonBrain	substantia_nigra	Tissue_Fantom60	Brain		DEL	-0.0193594	0.00887124	0.0290907	0.129619
FVC	NonBrain	substantia_nigra	Tissue_Fantom60	Brain		DEL	-0.01673	0.00859989	0.0517304	0.189878
Gamma	NonBrain	substantia_nigra	Tissue_Fantom60	Brain		DEL	-0.00190258	0.0110176	0.862899	0.940249
Glucose	NonBrain	substantia_nigra	Tissue_Fantom60	Brain		DEL	0.0027845	0.0122274	0.81986	0.918639
HbA1c	NonBrain	substantia_nigra	Tissue_Fantom60	Brain		DEL	-0.0115859	0.0112456	0.302886	0.559967
HDL	NonBrain	substantia_nigra	Tissue_Fantom60	Brain		DEL	-0.0433681	0.0111976	0.000107538	0.00191748
IGF1	NonBrain	substantia_nigra	Tissue_Fantom60	Brain		DEL	0.000720519	0.0113828	0.949529	0.978774
LDL	NonBrain	substantia_nigra	Tissue_Fantom60	Brain		DEL	-0.00134384	0.0117717	0.909112	0.960954
Neuroticism	Brain	substantia_nigra	Tissue_Fantom60	Brain		DEL	0.0442738	0.0128162	0.000551315	0.00717874
Platelet	NonBrain	substantia_nigra	Tissue_Fantom60	Brain		DEL	0.00770985	0.0113334	0.496331	0.731102
Reaction	Brain	substantia_nigra	Tissue_Fantom60	Brain		DEL	0.0425721	0.010837	8.55e-05	0.00160549
Redblood	NonBrain	substantia_nigra	Tissue_Fantom60	Brain		DEL	-0.00694593	0.00995184	0.485206	0.72204
StandingHeight	NonBrain	substantia_nigra	Tissue_Fantom60	Brain		DEL	-0.035484	0.00808986	1.15e-05	0.000309123
TDI	Brain	substantia_nigra	Tissue_Fantom60	Brain		DEL	0.0542294	0.0112944	1.58e-06	5.8e-05
Triglycerides	NonBrain	substantia_nigra	Tissue_Fantom60	Brain		DEL	0.0227246	0.0114433	0.0470518	0.177821
[truncated: 12,793 more rows]

## Sheet: ST3
Trait	Trait_FieldNumber	Trait_Cat	GeneSet	GeneSet_Type	GeneSet_Cat	Prop._SNPs	Prop._h2	Prop._h2_std_error	Enrichment	Enrichment_std_error	Enrichment_p	Coefficient	Coefficient_std_error	Coefficient_z.score	Transformed_Pval
Albumin	30600	NonBrain	adipocytes	SC_HPA81	NonBrain	0.0324001	0.0438511	0.00656472	1.35343	0.202614	0.081682	-4.8e-10	4.76e-09	-0.100888	0.54018
Albumin	30600	NonBrain	adipose_tissue	Tissue_Fantom60	NonBrain	0.0370175	0.0481572	0.0054833	1.30093	0.148127	0.0414401	1.18e-09	3.47e-09	0.340971	0.366563
Albumin	30600	NonBrain	alveolar_cells_type_1	SC_HPA81	NonBrain	0.029222	0.0404114	0.0070178	1.38291	0.240155	0.113537	-3.24e-09	5.59e-09	-0.580041	0.719057
Albumin	30600	NonBrain	alveolar_cells_type_2	SC_HPA81	NonBrain	0.0281096	0.0392615	0.0054285	1.39673	0.193119	0.0425624	-2.31e-09	4.48e-09	-0.515738	0.696981
Albumin	30600	NonBrain	amygdala	Tissue_Fantom60	Brain	0.0845482	0.0601374	0.00572391	0.71128	0.0677	3.17e-05	-1.92e-09	1.69e-09	-1.13153	0.871084
Albumin	30600	NonBrain	amygdala_excitatory	SC_Siletti31	Brain	0.152877	0.203756	0.0136286	1.33281	0.0891476	0.00057303	3.22e-09	2.6e-09	1.23492	0.108431
Albumin	30600	NonBrain	appendix	Tissue_Fantom60	NonBrain	0.0220803	0.0296419	0.00606701	1.34246	0.27477	0.211471	-5.8e-09	6.62e-09	-0.875786	0.809427
Albumin	30600	NonBrain	astrocyte	SC_Siletti31	Brain	0.119646	0.201198	0.0154966	1.68162	0.129521	1.04e-06	-2.67e-10	3.11e-09	-0.0859948	0.534265
Albumin	30600	NonBrain	astrocytes	SC_HPA81	Brain	0.0932178	0.0844807	0.00795379	0.906273	0.0853248	0.275299	-1.38e-09	2.17e-09	-0.635677	0.737507
Albumin	30600	NonBrain	b_cells	SC_HPA81	NonBrain	0.0223649	0.0328452	0.00692328	1.4686	0.30956	0.13059	-1.72e-09	7.29e-09	-0.236209	0.593365
Albumin	30600	NonBrain	basal_keratinocytes	SC_HPA81	NonBrain	0.0193858	0.0219204	0.0043766	1.13074	0.225763	0.561461	-6.15e-09	5.22e-09	-1.17858	0.880718
Albumin	30600	NonBrain	basal_prostatic_cells	SC_HPA81	NonBrain	0.0245169	0.0348508	0.00726677	1.4215	0.296399	0.156817	-6.21e-11	6.91e-09	-0.00899562	0.503589
Albumin	30600	NonBrain	basal_respiratory_cells	SC_HPA81	NonBrain	0.0150588	0.0210481	0.00784372	1.39772	0.520872	0.445206	-1.64e-09	1.2e-08	-0.136563	0.554312
Albumin	30600	NonBrain	basal_squamous_epithelial_cells	SC_HPA81	NonBrain	0.0193268	0.0284886	0.00433523	1.47405	0.224312	0.0324953	1.6e-09	5.16e-09	0.310133	0.37823
Albumin	30600	NonBrain	bergmann_glia	SC_Siletti31	Brain	0.116902	0.181737	0.0149334	1.55461	0.127743	3.04e-05	-1.74e-09	3.15e-09	-0.551908	0.709494
Albumin	30600	NonBrain	bipolar_cells	SC_HPA81	NonBrain	0.0309354	0.043036	0.00566025	1.39115	0.18297	0.0323156	1.84e-09	4.36e-09	0.42145	0.336713
Albumin	30600	NonBrain	breast	Tissue_Fantom60	NonBrain	0.0294	0.0390442	0.00570788	1.32803	0.194146	0.0896672	-3.06e-10	4.48e-09	-0.0683217	0.527235
Albumin	30600	NonBrain	breast_glandular_cells	SC_HPA81	NonBrain	0.0196947	0.0270368	0.00520608	1.3728	0.26434	0.154624	-2.72e-09	6.2e-09	-0.438318	0.669422
Albumin	30600	NonBrain	breast_myoepithelial_cells	SC_HPA81	NonBrain	0.0160611	0.0200846	0.00428491	1.25051	0.266787	0.344028	-7.09e-09	6.37e-09	-1.11296	0.867137
Albumin	30600	NonBrain	cardiomyocytes	SC_HPA81	NonBrain	0.0300831	0.0339818	0.00651408	1.1296	0.216536	0.548663	-2.47e-10	5e-09	-0.0493113	0.519664
Albumin	30600	NonBrain	caudate	Tissue_Fantom60	Brain	0.0752949	0.0531381	0.00603717	0.705733	0.0801803	0.00023162	-2.3e-09	1.97e-09	-1.16839	0.878675
Albumin	30600	NonBrain	cerebellar_inhibitory	SC_Siletti31	Brain	0.115841	0.201399	0.01436	1.73858	0.123964	3.2e-08	6.2e-09	2.82e-09	2.19637	0.0140328
Albumin	30600	NonBrain	cerebellum	Tissue_Fantom60	Brain	0.0657439	0.0494228	0.0062844	0.751746	0.095589	0.0100148	-4.79e-09	2.27e-09	-2.11668	0.982856
Albumin	30600	NonBrain	cervix	Tissue_Fantom60	NonBrain	0.0404433	0.0404776	0.00421632	1.00085	0.104253	0.993513	-5.05e-09	2.55e-09	-1.98177	0.976248
Albumin	30600	NonBrain	cge_interneuron	SC_Siletti31	Brain	0.123059	0.195036	0.0130644	1.5849	0.106164	1.59e-07	4.15e-09	2.93e-09	1.41779	0.0781264
Albumin	30600	NonBrain	cholangiocytes	SC_HPA81	NonBrain	0.0226013	0.0307646	0.00561817	1.36119	0.248577	0.14408	-5.08e-10	5.91e-09	-0.0860371	0.534282
Albumin	30600	NonBrain	choroid_plexus	SC_Siletti31	Brain	0.121924	0.202269	0.0144265	1.65898	0.118324	1.98e-07	1.66e-09	3.08e-09	0.538361	0.295164
Albumin	30600	NonBrain	ciliated_cells	SC_HPA81	NonBrain	0.0300326	0.0434541	0.00654289	1.4469	0.21786	0.0452815	3.28e-09	5.04e-09	0.650807	0.257586
Albumin	30600	NonBrain	club_cells	SC_HPA81	NonBrain	0.0229831	0.0369934	0.00660635	1.60959	0.287443	0.036168	5.22e-09	6.69e-09	0.780356	0.217591
Albumin	30600	NonBrain	collecting_duct_cells	SC_HPA81	NonBrain	0.0219298	0.0382522	0.00688987	1.7443	0.314178	0.021383	8.01e-09	7.34e-09	1.09039	0.137771
Albumin	30600	NonBrain	colon	Tissue_Fantom60	NonBrain	0.0261706	0.0421342	0.0060343	1.60998	0.230576	0.00978551	6.46e-09	5.44e-09	1.18784	0.117448
Albumin	30600	NonBrain	committed_oligodendrocyte_precursor	SC_Siletti31	Brain	0.117432	0.222861	0.0165993	1.89778	0.141352	3.34e-09	3.5e-09	3.45e-09	1.01379	0.155341
Albumin	30600	NonBrain	cone_photoreceptor_cells	SC_HPA81	NonBrain	0.0314326	0.0417789	0.00666402	1.32916	0.212009	0.123902	2e-09	5.01e-09	0.398603	0.345093
Albumin	30600	NonBrain	corpus_callosum	Tissue_Fantom60	Brain	0.0557341	0.0583323	0.00661596	1.04662	0.118706	0.693852	-2.99e-09	2.89e-09	-1.03713	0.850163
Albumin	30600	NonBrain	cytotrophoblasts	SC_HPA81	NonBrain	0.0174654	0.0314665	0.00602566	1.80165	0.345006	0.0219331	7.46e-09	7.89e-09	0.944653	0.172418
Albumin	30600	NonBrain	deep_layer_corticothalamic_and_6b	SC_Siletti31	Brain	0.141697	0.174157	0.0133821	1.22908	0.0944418	0.0173212	-1.45e-09	2.61e-09	-0.553311	0.709975
Albumin	30600	NonBrain	deep_layer_intratelencephalic	SC_Siletti31	Brain	0.135613	0.192662	0.0127339	1.42067	0.0938986	2.79e-05	2.14e-09	2.38e-09	0.901861	0.183565
Albumin	30600	NonBrain	deep_layer_near_projecting	SC_Siletti31	Brain	0.131748	0.164894	0.0120072	1.25159	0.0911379	0.00789103	-2.25e-09	2.47e-09	-0.912124	0.819148
Albumin	30600	NonBrain	dendritic_cells	SC_HPA81	NonBrain	0.0229642	0.029203	0.00473399	1.27168	0.206147	0.18671	-7.76e-09	4.99e-09	-1.55448	0.939965
Albumin	30600	NonBrain	distal_enterocytes	SC_HPA81	NonBrain	0.0181986	0.028407	0.00659361	1.56094	0.362313	0.126147	1.22e-09	8.34e-09	0.146742	0.441668
Albumin	30600	NonBrain	distal_tubular_cells	SC_HPA81	NonBrain	0.0128975	0.0203395	0.00417217	1.57701	0.323487	0.0764125	4.64e-09	7.38e-09	0.628667	0.264784
Albumin	30600	NonBrain	ductal_cells	SC_HPA81	NonBrain	0.0188561	0.0280502	0.00457035	1.4876	0.242381	0.0470003	4.04e-11	5.72e-09	0.00706945	0.49718
Albumin	30600	NonBrain	ductus_deferens	Tissue_Fantom60	NonBrain	0.0337829	0.0415748	0.00585152	1.23065	0.17321	0.18321	-7.73e-10	4.08e-09	-0.189409	0.575114
Albumin	30600	NonBrain	early_spermatids	SC_HPA81	NonBrain	0.0234498	0.032823	0.00495267	1.39971	0.211203	0.0612065	8.25e-09	4.95e-09	1.66544	0.0479125
Albumin	30600	NonBrain	eccentric_medium_spiny_neuron	SC_Siletti31	Brain	0.13994	0.167531	0.0115303	1.19716	0.0823946	0.0192967	-2.74e-09	2.1e-09	-1.30349	0.903796
Albumin	30600	NonBrain	endometrial_stromal_cells	SC_HPA81	NonBrain	0.0307095	0.0374759	0.0049997	1.22034	0.162807	0.171439	-1.71e-09	3.78e-09	-0.45216	0.674423
Albumin	30600	NonBrain	endometrium	Tissue_Fantom60	NonBrain	0.052117	0.0527811	0.0055077	1.01274	0.105679	0.903917	-4.83e-09	2.56e-09	-1.88428	0.970236
Albumin	30600	NonBrain	endothelial_cells	SC_HPA81	NonBrain	0.0343071	0.0448812	0.00498649	1.30822	0.145349	0.0338455	-1.06e-09	3.43e-09	-0.308449	0.62113
Albumin	30600	NonBrain	enteroendocrine_cells	SC_HPA81	NonBrain	0.0198909	0.0314498	0.00568791	1.58111	0.285955	0.0439983	3.26e-09	6.63e-09	0.491281	0.311614
Albumin	30600	NonBrain	ependymal	SC_Siletti31	Brain	0.112796	0.180856	0.0117647	1.60338	0.1043	8.49e-08	-1.76e-09	2.81e-09	-0.62677	0.734595
Albumin	30600	NonBrain	epididymis	Tissue_Fantom60	NonBrain	0.035524	0.0389423	0.00592581	1.09623	0.166812	0.563351	-2.48e-09	3.96e-09	-0.62513	0.734057
Albumin	30600	NonBrain	erythroid_cells	SC_HPA81	NonBrain	0.0152376	0.0333199	0.00746972	2.18668	0.490215	0.0161911	1.31e-08	1.13e-08	1.15895	0.123238
Albumin	30600	NonBrain	esophagus	Tissue_Fantom60	NonBrain	0.0233245	0.0299897	0.00418897	1.28576	0.179595	0.107593	-1.5e-09	4.2e-09	-0.355821	0.639013
Albumin	30600	NonBrain	excitatory_neurons	SC_HPA81	Brain	0.124029	0.0805446	0.00705395	0.649401	0.0568733	5.64e-09	-3.51e-09	1.48e-09	-2.3697	0.991099
Albumin	30600	NonBrain	exocrine_glandular_cells	SC_HPA81	NonBrain	0.0166966	0.0265789	0.00530284	1.59187	0.3176	0.0605928	-2.91e-09	7.48e-09	-0.389312	0.651477
Albumin	30600	NonBrain	extravillous_trophoblasts	SC_HPA81	NonBrain	0.0168746	0.0274562	0.00670815	1.62708	0.39753	0.117087	1.88e-09	9.26e-09	0.202781	0.419653
Albumin	30600	NonBrain	fibroblast	SC_Siletti31	Brain	0.120058	0.238749	0.0178538	1.98861	0.148709	3.95e-09	4.71e-09	3.98e-09	1.18333	0.118339
Albumin	30600	NonBrain	fibroblasts	SC_HPA81	NonBrain	0.0327441	0.045306	0.00558703	1.38364	0.170627	0.0245506	2.07e-09	4.02e-09	0.514485	0.303456
Albumin	30600	NonBrain	frontal_lobe	Tissue_Fantom60	Brain	0.0907069	0.0641913	0.0065443	0.707679	0.0721478	7.21e-05	-1.75e-09	1.88e-09	-0.929138	0.823591
Albumin	30600	NonBrain	gallbladder	Tissue_Fantom60	NonBrain	0.032846	0.0452477	0.00601019	1.37757	0.182981	0.0406174	1.91e-09	4.29e-09	0.444568	0.328316
Albumin	30600	NonBrain	gastric_mucus_secreting_cells	SC_HPA81	NonBrain	0.0203007	0.0385563	0.00656395	1.89926	0.323335	0.00577969	7.64e-09	7.35e-09	1.03954	0.149277
Albumin	30600	NonBrain	glandular_and_luminal_cells	SC_HPA81	NonBrain	0.0296382	0.0398196	0.00591777	1.34352	0.199667	0.0865931	-1.31e-09	4.69e-09	-0.278649	0.609743
Albumin	30600	NonBrain	globus_pallidus	Tissue_Fantom60	Brain	0.0547387	0.057773	0.00633279	1.05543	0.115691	0.632193	-9.75e-10	2.83e-09	-0.343954	0.63456
Albumin	30600	NonBrain	granulocytes	SC_HPA81	NonBrain	0.0256477	0.0307361	0.00452513	1.1984	0.176434	0.259096	-5.19e-09	4.15e-09	-1.25104	0.89454
Albumin	30600	NonBrain	granulosa_cells	SC_HPA81	NonBrain	0.0206347	0.0328584	0.00713029	1.59238	0.345548	0.0884856	7.13e-09	8.08e-09	0.882796	0.188673
Albumin	30600	NonBrain	heart_muscle	Tissue_Fantom60	NonBrain	0.0309227	0.0399462	0.00520374	1.29181	0.168282	0.0813073	1.83e-09	3.88e-09	0.471254	0.31873
Albumin	30600	NonBrain	hepatocytes	SC_HPA81	NonBrain	0.0180025	0.0347003	0.00690063	1.92752	0.383314	0.0158692	1.06e-08	8.95e-09	1.18245	0.118513
Albumin	30600	NonBrain	hippocampal_ca1_3	SC_Siletti31	Brain	0.139935	0.188868	0.0128446	1.34969	0.09179	0.00048224	2.89e-09	2.56e-09	1.12911	0.129427
Albumin	30600	NonBrain	hippocampal_ca4	SC_Siletti31	Brain	0.138661	0.182101	0.0120657	1.31328	0.0870154	0.00062512	6.16e-10	2.26e-09	0.272704	0.392541
Albumin	30600	NonBrain	hippocampal_dentate_gyrus	SC_Siletti31	Brain	0.133482	0.183593	0.0111206	1.37541	0.0833112	4.62e-05	2.66e-09	2.47e-09	1.07491	0.141207
Albumin	30600	NonBrain	hippocampus	Tissue_Fantom60	Brain	0.0786124	0.056586	0.00594232	0.71981	0.0755901	0.000215817	-1.97e-09	1.87e-09	-1.0492	0.852956
Albumin	30600	NonBrain	hofbauer_cells	SC_HPA81	NonBrain	0.0165255	0.044649	0.00709096	2.70183	0.429093	0.000105675	2.37e-08	9.94e-09	2.38296	0.00858693
Albumin	30600	NonBrain	horizontal_cells	SC_HPA81	NonBrain	0.0305721	0.0412887	0.00577823	1.35054	0.189003	0.0642101	1.06e-09	4.5e-09	0.234709	0.407217
Albumin	30600	NonBrain	inhibitory_neurons	SC_HPA81	Brain	0.130276	0.0889262	0.00751437	0.682597	0.0576803	1.3e-07	-2.27e-09	1.51e-09	-1.50253	0.93352
Albumin	30600	NonBrain	insular_cortex	Tissue_Fantom60	Brain	0.0878593	0.064151	0.00641315	0.730156	0.0729934	0.000256971	-2.08e-09	1.9e-09	-1.09273	0.862744
Albumin	30600	NonBrain	intestinal_goblet_cells	SC_HPA81	NonBrain	0.0197096	0.0265347	0.00421843	1.34628	0.214029	0.106158	-3.71e-09	4.95e-09	-0.748071	0.772791
Albumin	30600	NonBrain	ionocytes	SC_HPA81	NonBrain	0.0182453	0.0250688	0.00543196	1.37399	0.297719	0.207808	-2.14e-09	6.76e-09	-0.315607	0.62385
Albumin	30600	NonBrain	kidney	Tissue_Fantom60	NonBrain	0.0299752	0.0291253	0.00511041	0.971646	0.170488	0.867581	-6.04e-09	4.07e-09	-1.48565	0.931314
Albumin	30600	NonBrain	kupffer_cells	SC_HPA81	NonBrain	0.0210478	0.053587	0.00727324	2.54597	0.345559	2.33e-05	2.32e-08	8.14e-09	2.84526	0.00221878
Albumin	30600	NonBrain	lamp5_lhx6_and_chandelier	SC_Siletti31	Brain	0.133661	0.196312	0.0125512	1.46873	0.0939036	2.46e-06	4.15e-09	2.68e-09	1.54544	0.0611201
Albumin	30600	NonBrain	langerhans_cells	SC_HPA81	NonBrain	0.0240163	0.0405728	0.00585632	1.68938	0.243848	0.00529167	5.04e-09	5.73e-09	0.880238	0.189365
Albumin	30600	NonBrain	late_spermatids	SC_HPA81	NonBrain	0.0226307	0.0308086	0.00546884	1.36136	0.241656	0.140797	8.2e-10	5.52e-09	0.148563	0.440949
Albumin	30600	NonBrain	leydig_cells	SC_HPA81	NonBrain	0.0264408	0.0302656	0.00473016	1.14465	0.178896	0.418899	-4.6e-09	4.23e-09	-1.0875	0.861593
Albumin	30600	NonBrain	liver	Tissue_Fantom60	NonBrain	0.0203158	0.0313186	0.00568438	1.54158	0.2798	0.0564169	3.14e-09	6.57e-09	0.478028	0.316315
Albumin	30600	NonBrain	locus_coeruleus	Tissue_Fantom60	Brain	0.0599341	0.0584137	0.00695815	0.974632	0.116097	0.82633	1.7e-11	2.8e-09	0.00605224	0.497586
Albumin	30600	NonBrain	lower_rhombic_lip	SC_Siletti31	Brain	0.12087	0.200151	0.0174714	1.65593	0.144547	1.95e-05	5.48e-09	3.56e-09	1.53706	0.0621396
Albumin	30600	NonBrain	lung	Tissue_Fantom60	NonBrain	0.0301121	0.0392837	0.00600834	1.30458	0.199532	0.128554	5.74e-10	4.75e-09	0.120845	0.451907
Albumin	30600	NonBrain	lymph_node	Tissue_Fantom60	NonBrain	0.0189373	0.0295077	0.00440924	1.55818	0.232834	0.0162506	1.51e-09	5.55e-09	0.27276	0.392519
Albumin	30600	NonBrain	lymphatic_endothelial_cells	SC_HPA81	NonBrain	0.0315142	0.0405776	0.00497774	1.2876	0.157952	0.0664038	-1.54e-09	3.7e-09	-0.416936	0.661637
Albumin	30600	NonBrain	macrophages	SC_HPA81	NonBrain	0.0224929	0.0486633	0.00685969	2.16349	0.304971	0.00020848	1.5e-08	7.15e-09	2.10314	0.017727
Albumin	30600	NonBrain	mammillary_body	SC_Siletti31	Brain	0.14141	0.171634	0.0128165	1.21373	0.0906338	0.0189695	-1.47e-10	2.41e-09	-0.0607867	0.524235
Albumin	30600	NonBrain	medial_frontal_gyrus	Tissue_Fantom60	Brain	0.0906622	0.0686081	0.00670415	0.756744	0.0739464	0.00100708	-1.25e-09	1.91e-09	-0.652529	0.74297
Albumin	30600	NonBrain	medial_temporal_gyrus	Tissue_Fantom60	Brain	0.0878218	0.0651959	0.00646628	0.742366	0.0736295	0.000452363	-1.09e-09	1.85e-09	-0.586102	0.721096
Albumin	30600	NonBrain	medium_spiny_neuron	SC_Siletti31	Brain	0.131058	0.179418	0.0117803	1.36899	0.0898858	0.000105541	5.12e-10	2.29e-09	0.223905	0.411416
Albumin	30600	NonBrain	medulla_oblongata	Tissue_Fantom60	Brain	0.0543643	0.0566168	0.00782989	1.04143	0.144026	0.773062	-1.75e-10	3.46e-09	-0.050606	0.52018
Albumin	30600	NonBrain	melanocytes	SC_HPA81	NonBrain	0.0227456	0.0268712	0.00432664	1.18138	0.190219	0.340619	-5.46e-09	4.49e-09	-1.21547	0.887907
Albumin	30600	NonBrain	mesothelial_cells	SC_HPA81	NonBrain	0.0230784	0.0382396	0.00629658	1.65694	0.272834	0.0162847	5e-09	6.38e-09	0.782905	0.216841
Albumin	30600	NonBrain	mge_interneuron	SC_Siletti31	Brain	0.133352	0.182089	0.0107099	1.36548	0.0803127	2.21e-05	9.31e-10	2.32e-09	0.401494	0.344028
Albumin	30600	NonBrain	microglia	SC_Siletti31	Brain	0.103532	0.235611	0.0186953	2.27572	0.180574	1e-09	8.91e-09	4.34e-09	2.05578	0.019902
Albumin	30600	NonBrain	microglial_cells	SC_HPA81	Brain	0.0849454	0.0898415	0.0081939	1.05764	0.0964608	0.549818	-8.34e-10	2.4e-09	-0.347533	0.635904
Albumin	30600	NonBrain	midbrain_derived_inhibitory	SC_Siletti31	Brain	0.130064	0.185986	0.0129616	1.42995	0.0996553	5.66e-05	4.14e-09	2.61e-09	1.58511	0.0564701
Albumin	30600	NonBrain	miscellaneous	SC_Siletti31	Brain	0.145742	0.189656	0.0114528	1.30131	0.0785827	0.000267039	-5.54e-10	2.23e-09	-0.248665	0.59819
Albumin	30600	NonBrain	monocytes	SC_HPA81	NonBrain	0.0227323	0.0450401	0.00901606	1.98132	0.396619	0.0138955	9.16e-09	9.31e-09	0.984427	0.162453
Albumin	30600	NonBrain	mucus_glandular_cells	SC_HPA81	NonBrain	0.0347379	0.0423113	0.0055255	1.21802	0.159063	0.172679	-1.33e-09	3.78e-09	-0.352546	0.637786
Albumin	30600	NonBrain	muller_glia_cells	SC_HPA81	Brain	0.0299485	0.0337392	0.00509987	1.12657	0.170288	0.45624	-3.26e-09	4.01e-09	-0.813955	0.792164
Albumin	30600	NonBrain	nk_cells	SC_HPA81	NonBrain	0.0211508	0.0358659	0.00661208	1.69572	0.312617	0.0260291	2.31e-09	7.29e-09	0.317348	0.37549
Albumin	30600	NonBrain	nucleus_accumbens	Tissue_Fantom60	Brain	0.0863423	0.0626967	0.0066052	0.726141	0.0765002	0.000371989	-1.91e-09	1.96e-09	-0.97296	0.834713
Albumin	30600	NonBrain	occipital_cortex	Tissue_Fantom60	Brain	0.0874619	0.0740537	0.00733094	0.846697	0.0838187	0.0677255	-2.13e-10	2.15e-09	-0.0989679	0.539418
Albumin	30600	NonBrain	occipital_lobe	Tissue_Fantom60	Brain	0.0744791	0.0534427	0.00521471	0.717553	0.0700157	7.5e-05	-1.9e-09	1.7e-09	-1.12067	0.868786
Albumin	30600	NonBrain	occipital_pole	Tissue_Fantom60	Brain	0.0640617	0.0595116	0.00535195	0.928974	0.0835436	0.394435	-5.42e-10	2.16e-09	-0.251284	0.599203
Albumin	30600	NonBrain	olfactory_bulb	Tissue_Fantom60	Brain	0.0810752	0.059366	0.00641297	0.732234	0.0790991	0.00067769	-2.04e-09	2.03e-09	-1.002	0.841828
Albumin	30600	NonBrain	oligodendrocyte	SC_Siletti31	Brain	0.110615	0.170487	0.0116996	1.54127	0.105769	2.52e-07	-3.22e-09	3.04e-09	-1.06113	0.855685
Albumin	30600	NonBrain	oligodendrocyte_precursor	SC_Siletti31	Brain	0.143097	0.167233	0.0109175	1.16867	0.0762942	0.025274	-2.65e-09	2.22e-09	-1.19145	0.883261
Albumin	30600	NonBrain	oligodendrocyte_precursor_cells	SC_HPA81	Brain	0.118565	0.096826	0.00851275	0.816646	0.0717979	0.0122683	-6.31e-11	1.87e-09	-0.0337979	0.513481
Albumin	30600	NonBrain	oligodendrocytes	SC_HPA81	Brain	0.0828181	0.0700842	0.00667938	0.846243	0.0806512	0.0588469	-4e-09	2.05e-09	-1.95623	0.974781
Albumin	30600	NonBrain	oocytes	SC_HPA81	NonBrain	0.0313899	0.0401599	0.00628996	1.27939	0.200382	0.167789	5.89e-10	4.54e-09	0.129607	0.448439
Albumin	30600	NonBrain	ovarian_stromal_cells	SC_HPA81	NonBrain	0.0184056	0.0215687	0.0045124	1.17185	0.245164	0.483082	-4.06e-09	5.72e-09	-0.710882	0.761421
Albumin	30600	NonBrain	ovary	Tissue_Fantom60	NonBrain	0.0325276	0.039992	0.00573446	1.22948	0.176295	0.192318	1.85e-10	4.16e-09	0.0445667	0.482226
Albumin	30600	NonBrain	pancreas	Tissue_Fantom60	NonBrain	0.0245347	0.0275114	0.00465139	1.12133	0.189585	0.521094	-6.16e-09	4.49e-09	-1.37204	0.914975
Albumin	30600	NonBrain	pancreatic_endocrine_cells	SC_HPA81	NonBrain	0.0155013	0.0262883	0.00422583	1.69587	0.27261	0.011123	1.55e-09	6.33e-09	0.244286	0.403505
Albumin	30600	NonBrain	paneth_cells	SC_HPA81	NonBrain	0.0161898	0.0214475	0.0056305	1.32475	0.34778	0.352399	-3.28e-09	7.79e-09	-0.421557	0.663326
Albumin	30600	NonBrain	paracentral_gyrus	Tissue_Fantom60	Brain	0.0819366	0.0629263	0.00702552	0.767988	0.0857434	0.00668475	-1.52e-09	2.21e-09	-0.688749	0.754509
Albumin	30600	NonBrain	parietal_lobe	Tissue_Fantom60	Brain	0.0870495	0.0692026	0.0070085	0.79498	0.0805116	0.010132	-8.97e-10	2.1e-09	-0.427058	0.665332
Albumin	30600	NonBrain	peritubular_cells	SC_HPA81	NonBrain	0.0281217	0.0388566	0.00656383	1.38173	0.233408	0.104282	3.31e-10	5.62e-09	0.0588329	0.476543
Albumin	30600	NonBrain	pituitary_gland	Tissue_Fantom60	Brain	0.0577956	0.0511257	0.00667299	0.884594	0.115458	0.317381	-2.46e-10	2.81e-09	-0.0874505	0.534843
Albumin	30600	NonBrain	placenta	Tissue_Fantom60	NonBrain	0.0290214	0.0513608	0.00666311	1.76976	0.229593	0.00102604	1.08e-08	5.36e-09	2.00939	0.0222481
Albumin	30600	NonBrain	plasma_cells	SC_HPA81	NonBrain	0.0165431	0.0355018	0.00874106	2.14602	0.528381	0.0313718	1.14e-08	1.24e-08	0.92347	0.177881
Albumin	30600	NonBrain	pons	Tissue_Fantom60	Brain	0.0621481	0.0536669	0.00630118	0.863531	0.10139	0.176498	-7.25e-10	2.44e-09	-0.296994	0.616764
Albumin	30600	NonBrain	postcentral_gyrus	Tissue_Fantom60	Brain	0.0690916	0.0617497	0.00673403	0.893737	0.0974652	0.271017	-5.65e-10	2.49e-09	-0.226883	0.589743
Albumin	30600	NonBrain	prostate	Tissue_Fantom60	NonBrain	0.0363825	0.0429036	0.00535765	1.17924	0.147259	0.220317	-1.96e-09	3.51e-09	-0.558445	0.71173
Albumin	30600	NonBrain	prostatic_glandular_cells	SC_HPA81	NonBrain	0.0289204	0.0268483	0.00379114	0.928352	0.131089	0.586757	-6.99e-09	3.2e-09	-2.18634	0.985605
Albumin	30600	NonBrain	proximal_enterocytes	SC_HPA81	NonBrain	0.0154134	0.0290825	0.00666581	1.88683	0.432467	0.0467323	9.17e-09	9.81e-09	0.934067	0.175135
Albumin	30600	NonBrain	proximal_tubular_cells	SC_HPA81	NonBrain	0.017641	0.0157983	0.00353572	0.895546	0.200426	0.600571	-1.2e-08	4.69e-09	-2.55402	0.994676
Albumin	30600	NonBrain	putamen	Tissue_Fantom60	Brain	0.0674164	0.0500585	0.00631692	0.742526	0.0936999	0.00555218	-1.15e-09	2.27e-09	-0.506205	0.693644
Albumin	30600	NonBrain	retina	Tissue_Fantom60	NonBrain	0.0485119	0.0497434	0.00532888	1.02539	0.109847	0.816923	-3.72e-09	2.68e-09	-1.39146	0.917957
Albumin	30600	NonBrain	rod_photoreceptor_cells	SC_HPA81	NonBrain	0.0323409	0.0366207	0.00489255	1.13233	0.151281	0.381756	-4.68e-09	3.55e-09	-1.31924	0.906456
Albumin	30600	NonBrain	salivary_duct_cells	SC_HPA81	NonBrain	0.0326873	0.0419644	0.0069778	1.28381	0.213472	0.183695	-1.65e-09	4.99e-09	-0.32975	0.629205
Albumin	30600	NonBrain	salivary_gland	Tissue_Fantom60	NonBrain	0.0259443	0.0304664	0.00380242	1.1743	0.146561	0.233375	-2.33e-09	3.44e-09	-0.677687	0.751015
Albumin	30600	NonBrain	schwann_cells	SC_HPA81	NonBrain	0.03102	0.0386639	0.00636919	1.24642	0.205325	0.23582	-2.63e-09	4.79e-09	-0.549682	0.708731
Albumin	30600	NonBrain	secretory_cells	SC_HPA81	NonBrain	0.0188797	0.0348246	0.00644476	1.84455	0.341359	0.0119417	7.18e-09	7.93e-09	0.905483	0.182605
Albumin	30600	NonBrain	seminal_vesicle	Tissue_Fantom60	NonBrain	0.0379876	0.0426231	0.00576302	1.12203	0.151708	0.421763	-1.39e-09	3.59e-09	-0.388364	0.651127
Albumin	30600	NonBrain	serous_glandular_cells	SC_HPA81	NonBrain	0.0248953	0.0331925	0.00590674	1.33328	0.237263	0.158024	1.41e-09	5.47e-09	0.258768	0.397907
Albumin	30600	NonBrain	sertoli_cells	SC_HPA81	NonBrain	0.0221085	0.0389227	0.00588098	1.76053	0.266006	0.00499518	9.6e-09	6.23e-09	1.54249	0.0614775
Albumin	30600	NonBrain	skeletal_muscle	Tissue_Fantom60	NonBrain	0.0308145	0.0438642	0.00697834	1.42349	0.226463	0.0672752	2.94e-09	5.26e-09	0.557689	0.288528
Albumin	30600	NonBrain	skeletal_myocytes	SC_HPA81	NonBrain	0.0285471	0.0316392	0.00594898	1.10831	0.208391	0.603073	-4.68e-09	4.89e-09	-0.956199	0.830514
Albumin	30600	NonBrain	small_intestine	Tissue_Fantom60	NonBrain	0.0248393	0.035625	0.00536608	1.43422	0.216032	0.0494149	2.2e-09	5.14e-09	0.42727	0.334591
Albumin	30600	NonBrain	smooth_muscle	Tissue_Fantom60	NonBrain	0.0467238	0.0459359	0.00553833	0.983137	0.118533	0.886896	-5.87e-09	2.84e-09	-2.06794	0.980677
Albumin	30600	NonBrain	smooth_muscle_cells	SC_HPA81	NonBrain	0.0320528	0.0372326	0.00489751	1.1616	0.152795	0.290057	-3.78e-09	3.64e-09	-1.03924	0.850653
Albumin	30600	NonBrain	spermatocytes	SC_HPA81	NonBrain	0.0195796	0.0369351	0.00680019	1.88641	0.34731	0.0127348	1.35e-08	8.05e-09	1.67444	0.0470224
Albumin	30600	NonBrain	spermatogonia	SC_HPA81	NonBrain	0.0181884	0.0390039	0.0069979	2.14444	0.384745	0.00409661	1.38e-08	8.85e-09	1.56097	0.0592653
Albumin	30600	NonBrain	spinal_cord	Tissue_Fantom60	Brain	0.0554796	0.0531203	0.00668732	0.957473	0.120536	0.723621	-1.87e-09	2.9e-09	-0.64492	0.74051
Albumin	30600	NonBrain	splatter	SC_Siletti31	Brain	0.121208	0.201635	0.0154326	1.66355	0.127323	1.63e-06	6.52e-09	2.82e-09	2.31131	0.0104079
Albumin	30600	NonBrain	spleen	Tissue_Fantom60	NonBrain	0.0226386	0.0293056	0.00497447	1.2945	0.219734	0.180812	-3.17e-09	5.16e-09	-0.615158	0.730775
Albumin	30600	NonBrain	squamous_epithelial_cells	SC_HPA81	NonBrain	0.0154014	0.0201573	0.00409905	1.3088	0.266149	0.241978	-4.04e-09	6.19e-09	-0.653005	0.743124
Albumin	30600	NonBrain	substantia_nigra	Tissue_Fantom60	Brain	0.0493107	0.0554751	0.00637162	1.12501	0.129214	0.333667	-3.29e-10	3.11e-09	-0.105561	0.542035
Albumin	30600	NonBrain	suprabasal_keratinocytes	SC_HPA81	NonBrain	0.0171738	0.016997	0.00426873	0.989702	0.24856	0.966926	-1.14e-08	5.77e-09	-1.98417	0.976382
Albumin	30600	NonBrain	syncytiotrophoblasts	SC_HPA81	NonBrain	0.0201132	0.0330538	0.00600167	1.64339	0.298395	0.030733	2.95e-09	6.83e-09	0.432246	0.332781
Albumin	30600	NonBrain	t_cells	SC_HPA81	NonBrain	0.0204205	0.0308852	0.0068088	1.51246	0.333429	0.123175	-1.75e-09	7.75e-09	-0.225387	0.589161
Albumin	30600	NonBrain	temporal_cortex	Tissue_Fantom60	Brain	0.0635826	0.0518549	0.00499974	0.815552	0.0786338	0.0188227	-3.69e-09	1.98e-09	-1.86247	0.968731
Albumin	30600	NonBrain	testis	Tissue_Fantom60	NonBrain	0.0235459	0.0418524	0.00820717	1.77748	0.34856	0.0291212	9.13e-09	7.97e-09	1.14539	0.126024
Albumin	30600	NonBrain	thalamic_excitatory	SC_Siletti31	Brain	0.133378	0.197324	0.0144061	1.47943	0.108009	1.79e-05	5.39e-09	2.85e-09	1.88706	0.029576
Albumin	30600	NonBrain	thalamus	Tissue_Fantom60	Brain	0.0588518	0.059361	0.00628668	1.00865	0.106822	0.935351	-1.46e-09	2.61e-09	-0.558896	0.711884
Albumin	30600	NonBrain	thymus	Tissue_Fantom60	NonBrain	0.0230509	0.0305848	0.00492991	1.32684	0.213871	0.124626	-4.11e-09	5.09e-09	-0.808353	0.790556
Albumin	30600	NonBrain	thyroid_gland	Tissue_Fantom60	NonBrain	0.0323221	0.0336353	0.00579571	1.04063	0.179311	0.820394	-3.72e-09	4.25e-09	-0.877025	0.809763
Albumin	30600	NonBrain	tongue	Tissue_Fantom60	NonBrain	0.0223478	0.0286396	0.00415788	1.28154	0.186053	0.129377	-1.04e-09	4.46e-09	-0.23364	0.592368
Albumin	30600	NonBrain	tonsil	Tissue_Fantom60	NonBrain	0.0178638	0.0200027	0.00390212	1.11973	0.218437	0.581503	-1.24e-08	5.48e-09	-2.26126	0.988128
Albumin	30600	NonBrain	undifferentiated_cells	SC_HPA81	NonBrain	0.0159826	0.0237596	0.00495819	1.48659	0.310223	0.119622	3.94e-10	7.13e-09	0.0552667	0.477963
Albumin	30600	NonBrain	upper_layer_intratelencephalic	SC_Siletti31	Brain	0.12668	0.196945	0.0132526	1.55467	0.104615	1.7e-06	4.01e-09	2.79e-09	1.43634	0.0754525
Albumin	30600	NonBrain	upper_rhombic_lip	SC_Siletti31	Brain	0.104736	0.194198	0.0145215	1.85418	0.138649	1.54e-08	4.52e-09	2.91e-09	1.55231	0.0602946
Albumin	30600	NonBrain	urinary_bladder	Tissue_Fantom60	NonBrain	0.0360071	0.0458398	0.00646852	1.27308	0.179646	0.127467	-6.97e-10	4.23e-09	-0.164733	0.565423
Albumin	30600	NonBrain	vagina	Tissue_Fantom60	NonBrain	0.0370658	0.0507569	0.00560511	1.36937	0.151221	0.0150035	1.23e-09	3.43e-09	0.357402	0.360395
Albumin	30600	NonBrain	vascular	SC_Siletti31	Brain	0.108495	0.247573	0.0178499	2.28189	0.164523	3.12e-11	7.59e-09	4.3e-09	1.76716	0.0386004
BirthWeight	20022	NonBrain	adipocytes	SC_HPA81	NonBrain	0.0324001	0.0318936	0.00539759	0.984368	0.166592	0.925323	-7.64e-09	3.3e-09	-2.31416	0.989671
BirthWeight	20022	NonBrain	adipose_tissue	Tissue_Fantom60	NonBrain	0.0370175	0.0355681	0.00558553	0.960845	0.150889	0.79528	-6.09e-09	2.97e-09	-2.04856	0.979747
BirthWeight	20022	NonBrain	alveolar_cells_type_1	SC_HPA81	NonBrain	0.029222	0.0423937	0.00637905	1.45075	0.218296	0.0397998	-8.4e-10	4.35e-09	-0.192925	0.576491
BirthWeight	20022	NonBrain	alveolar_cells_type_2	SC_HPA81	NonBrain	0.0281096	0.0433971	0.00656394	1.54385	0.233512	0.0227441	1.3e-09	4.55e-09	0.286698	0.387172
BirthWeight	20022	NonBrain	amygdala	Tissue_Fantom60	Brain	0.0845482	0.0444032	0.00716339	0.525183	0.0847256	3.11e-08	-5.6e-09	1.77e-09	-3.15562	0.999199
BirthWeight	20022	NonBrain	amygdala_excitatory	SC_Siletti31	Brain	0.152877	0.158951	0.0116995	1.03973	0.076529	0.604091	-2.44e-09	1.84e-09	-1.32983	0.908213
BirthWeight	20022	NonBrain	appendix	Tissue_Fantom60	NonBrain	0.0220803	0.0320071	0.0070631	1.44958	0.319883	0.158751	-1.07e-09	6.21e-09	-0.17235	0.568419
BirthWeight	20022	NonBrain	astrocyte	SC_Siletti31	Brain	0.119646	0.203544	0.0171765	1.70122	0.143561	1e-06	2.4e-09	3.02e-09	0.794798	0.213365
BirthWeight	20022	NonBrain	astrocytes	SC_HPA81	Brain	0.0932178	0.08447	0.00951483	0.906157	0.102071	0.358954	-1.77e-09	2.1e-09	-0.841887	0.800074
BirthWeight	20022	NonBrain	b_cells	SC_HPA81	NonBrain	0.0223649	0.0262462	0.00660854	1.17354	0.295486	0.557428	-5.84e-09	5.78e-09	-1.01023	0.843807
BirthWeight	20022	NonBrain	basal_keratinocytes	SC_HPA81	NonBrain	0.0193858	0.0238391	0.00593669	1.22972	0.306239	0.452789	-3.04e-09	5.96e-09	-0.509835	0.694917
BirthWeight	20022	NonBrain	basal_prostatic_cells	SC_HPA81	NonBrain	0.0245169	0.0354581	0.00718727	1.44628	0.293156	0.130863	7.86e-10	5.75e-09	0.136847	0.445576
BirthWeight	20022	NonBrain	basal_respiratory_cells	SC_HPA81	NonBrain	0.0150588	0.0251129	0.00635553	1.66765	0.422047	0.112609	4.44e-09	8.02e-09	0.553033	0.29012
BirthWeight	20022	NonBrain	basal_squamous_epithelial_cells	SC_HPA81	NonBrain	0.0193268	0.0235609	0.0051712	1.21908	0.267567	0.410453	-3.29e-09	5.17e-09	-0.636643	0.737821
BirthWeight	20022	NonBrain	bergmann_glia	SC_Siletti31	Brain	0.116902	0.178883	0.0141011	1.5302	0.120623	1.55e-05	-1.5e-10	2.47e-09	-0.0607031	0.524202
BirthWeight	20022	NonBrain	bipolar_cells	SC_HPA81	NonBrain	0.0309354	0.0403306	0.00644556	1.3037	0.208355	0.149712	6.13e-10	4.08e-09	0.150221	0.440295
BirthWeight	20022	NonBrain	breast	Tissue_Fantom60	NonBrain	0.0294	0.0428467	0.00752096	1.45737	0.255815	0.0765544	2.26e-09	5e-09	0.450935	0.326018
BirthWeight	20022	NonBrain	breast_glandular_cells	SC_HPA81	NonBrain	0.0196947	0.0286077	0.0078654	1.45256	0.399367	0.258656	1.08e-11	7.76e-09	0.00139119	0.499445
BirthWeight	20022	NonBrain	breast_myoepithelial_cells	SC_HPA81	NonBrain	0.0160611	0.0192681	0.00559171	1.19967	0.348151	0.566785	-6.05e-09	6.64e-09	-0.911357	0.818946
BirthWeight	20022	NonBrain	cardiomyocytes	SC_HPA81	NonBrain	0.0300831	0.0256724	0.00531473	0.853383	0.176669	0.408399	-5.89e-09	3.5e-09	-1.68281	0.953794
BirthWeight	20022	NonBrain	caudate	Tissue_Fantom60	Brain	0.0752949	0.0505963	0.00814012	0.671974	0.10811	0.00291735	-2.37e-09	2.36e-09	-1.00495	0.842539
BirthWeight	20022	NonBrain	cerebellar_inhibitory	SC_Siletti31	Brain	0.115841	0.156752	0.0134971	1.35317	0.116515	0.00293091	-1.09e-09	2.44e-09	-0.446523	0.67239
BirthWeight	20022	NonBrain	cerebellum	Tissue_Fantom60	Brain	0.0657439	0.0560383	0.00649838	0.852372	0.0988438	0.134871	-1.82e-09	2.04e-09	-0.8924	0.813911
BirthWeight	20022	NonBrain	cervix	Tissue_Fantom60	NonBrain	0.0404433	0.0501898	0.00758803	1.24099	0.187621	0.201778	5.02e-10	3.77e-09	0.133081	0.447065
BirthWeight	20022	NonBrain	cge_interneuron	SC_Siletti31	Brain	0.123059	0.162984	0.0120679	1.32444	0.0980661	0.00103065	-2.56e-10	2.02e-09	-0.126304	0.550254
BirthWeight	20022	NonBrain	cholangiocytes	SC_HPA81	NonBrain	0.0226013	0.036127	0.00662001	1.59845	0.292904	0.0425617	5.1e-09	5.64e-09	0.904003	0.182997
BirthWeight	20022	NonBrain	choroid_plexus	SC_Siletti31	Brain	0.121924	0.196988	0.0149106	1.61566	0.122294	2.13e-06	2.15e-09	2.82e-09	0.764166	0.222384
BirthWeight	20022	NonBrain	ciliated_cells	SC_HPA81	NonBrain	0.0300326	0.0372797	0.00874376	1.24131	0.291142	0.406865	-3.2e-10	5.68e-09	-0.0563618	0.522473
BirthWeight	20022	NonBrain	club_cells	SC_HPA81	NonBrain	0.0229831	0.0325778	0.00607149	1.41747	0.264172	0.112787	7.34e-10	5.05e-09	0.145167	0.44229
BirthWeight	20022	NonBrain	collecting_duct_cells	SC_HPA81	NonBrain	0.0219298	0.0350865	0.0071184	1.59995	0.3246	0.0656641	4.89e-09	6.22e-09	0.785186	0.216172
BirthWeight	20022	NonBrain	colon	Tissue_Fantom60	NonBrain	0.0261706	0.0423456	0.00696814	1.61806	0.266258	0.0200251	5.86e-09	5.1e-09	1.14988	0.125097
BirthWeight	20022	NonBrain	committed_oligodendrocyte_precursor	SC_Siletti31	Brain	0.117432	0.202462	0.0148237	1.72407	0.126232	1.67e-08	1.56e-09	2.77e-09	0.565493	0.285869
BirthWeight	20022	NonBrain	cone_photoreceptor_cells	SC_HPA81	NonBrain	0.0314326	0.0329487	0.00594512	1.04823	0.189138	0.798745	-3.51e-09	3.72e-09	-0.944145	0.827452
BirthWeight	20022	NonBrain	corpus_callosum	Tissue_Fantom60	Brain	0.0557341	0.0548497	0.00658042	0.984131	0.118068	0.893196	-3.26e-09	2.4e-09	-1.36118	0.913271
BirthWeight	20022	NonBrain	cytotrophoblasts	SC_HPA81	NonBrain	0.0174654	0.0273404	0.00680413	1.5654	0.389578	0.148994	1.84e-09	7.44e-09	0.247826	0.402135
BirthWeight	20022	NonBrain	deep_layer_corticothalamic_and_6b	SC_Siletti31	Brain	0.141697	0.153511	0.0115547	1.08337	0.0815452	0.306358	-2.55e-09	1.85e-09	-1.37845	0.915967
BirthWeight	20022	NonBrain	deep_layer_intratelencephalic	SC_Siletti31	Brain	0.135613	0.155373	0.0122221	1.1457	0.0901248	0.105783	-2.87e-09	2.02e-09	-1.42093	0.922331
BirthWeight	20022	NonBrain	deep_layer_near_projecting	SC_Siletti31	Brain	0.131748	0.166634	0.0134507	1.26479	0.102094	0.00856081	1.01e-09	2.4e-09	0.422448	0.336349
BirthWeight	20022	NonBrain	dendritic_cells	SC_HPA81	NonBrain	0.0229642	0.0319303	0.00663008	1.39044	0.288714	0.176147	-2.7e-09	5.59e-09	-0.48225	0.685186
BirthWeight	20022	NonBrain	distal_enterocytes	SC_HPA81	NonBrain	0.0181986	0.0258835	0.00611341	1.42228	0.335927	0.207184	-6.2e-10	6.47e-09	-0.0959093	0.538204
BirthWeight	20022	NonBrain	distal_tubular_cells	SC_HPA81	NonBrain	0.0128975	0.0142009	0.00386981	1.10106	0.300044	0.736113	-5e-09	5.84e-09	-0.85596	0.80399
BirthWeight	20022	NonBrain	ductal_cells	SC_HPA81	NonBrain	0.0188561	0.0285736	0.00740082	1.51535	0.39249	0.190715	1.36e-09	7.48e-09	0.181382	0.428034
BirthWeight	20022	NonBrain	ductus_deferens	Tissue_Fantom60	NonBrain	0.0337829	0.05818	0.0100549	1.72218	0.297632	0.0154197	9.1e-09	5.79e-09	1.57182	0.0579966
BirthWeight	20022	NonBrain	early_spermatids	SC_HPA81	NonBrain	0.0234498	0.0269637	0.00541449	1.14985	0.230897	0.51697	2.48e-09	4.53e-09	0.547324	0.292078
BirthWeight	20022	NonBrain	eccentric_medium_spiny_neuron	SC_Siletti31	Brain	0.13994	0.163698	0.0132635	1.16977	0.0947797	0.077618	-1.33e-09	2.1e-09	-0.633114	0.73667
BirthWeight	20022	NonBrain	endometrial_stromal_cells	SC_HPA81	NonBrain	0.0307095	0.0485283	0.00776272	1.58024	0.252779	0.0233952	6.14e-09	4.98e-09	1.23303	0.108782
BirthWeight	20022	NonBrain	endometrium	Tissue_Fantom60	NonBrain	0.052117	0.0715051	0.0100069	1.37201	0.192009	0.0533907	2.97e-09	3.82e-09	0.776524	0.21872
BirthWeight	20022	NonBrain	endothelial_cells	SC_HPA81	NonBrain	0.0343071	0.0460533	0.00650354	1.34238	0.189568	0.0727195	-2.33e-10	3.7e-09	-0.0629061	0.525079
BirthWeight	20022	NonBrain	enteroendocrine_cells	SC_HPA81	NonBrain	0.0198909	0.0345592	0.00802242	1.73743	0.40332	0.0678549	7.28e-09	7.75e-09	0.940424	0.1735
BirthWeight	20022	NonBrain	ependymal	SC_Siletti31	Brain	0.112796	0.192123	0.0147095	1.70328	0.130407	9.16e-08	3.73e-09	2.82e-09	1.3238	0.0927841
BirthWeight	20022	NonBrain	epididymis	Tissue_Fantom60	NonBrain	0.035524	0.0581385	0.00860452	1.6366	0.242217	0.0102514	8.92e-09	4.76e-09	1.87418	0.0304525
BirthWeight	20022	NonBrain	erythroid_cells	SC_HPA81	NonBrain	0.0152376	0.017558	0.00496309	1.15228	0.325713	0.640193	-7.64e-09	6.26e-09	-1.22092	0.888941
BirthWeight	20022	NonBrain	esophagus	Tissue_Fantom60	NonBrain	0.0233245	0.0352979	0.00560596	1.51334	0.240347	0.0320988	3.54e-09	4.66e-09	0.759578	0.223754
BirthWeight	20022	NonBrain	excitatory_neurons	SC_HPA81	Brain	0.124029	0.0911379	0.00991897	0.734811	0.0799729	0.0010329	-1.19e-09	1.88e-09	-0.634673	0.737179
BirthWeight	20022	NonBrain	exocrine_glandular_cells	SC_HPA81	NonBrain	0.0166966	0.0318342	0.00719311	1.90663	0.430813	0.0355486	5e-09	8.2e-09	0.61062	0.270726
BirthWeight	20022	NonBrain	extravillous_trophoblasts	SC_HPA81	NonBrain	0.0168746	0.0327054	0.00641382	1.93814	0.380088	0.0151685	8.29e-09	7.33e-09	1.13165	0.128891
BirthWeight	20022	NonBrain	fibroblast	SC_Siletti31	Brain	0.120058	0.213983	0.0125931	1.78233	0.104892	9.22e-12	1.29e-09	2.39e-09	0.541801	0.293978
BirthWeight	20022	NonBrain	fibroblasts	SC_HPA81	NonBrain	0.0327441	0.0433136	0.00759312	1.32279	0.231893	0.167102	6.5e-10	4.58e-09	0.141825	0.443609
BirthWeight	20022	NonBrain	frontal_lobe	Tissue_Fantom60	Brain	0.0907069	0.056902	0.00773074	0.627318	0.0852277	1.19e-05	-3.14e-09	1.82e-09	-1.71895	0.957188
BirthWeight	20022	NonBrain	gallbladder	Tissue_Fantom60	NonBrain	0.032846	0.0409583	0.00657141	1.24698	0.200068	0.216961	-8.23e-10	3.89e-09	-0.211651	0.58381
BirthWeight	20022	NonBrain	gastric_mucus_secreting_cells	SC_HPA81	NonBrain	0.0203007	0.0406326	0.00798175	2.00153	0.393175	0.0121273	9.13e-09	7.61e-09	1.20104	0.114869
BirthWeight	20022	NonBrain	glandular_and_luminal_cells	SC_HPA81	NonBrain	0.0296382	0.0423105	0.0084226	1.42757	0.284181	0.132265	3.61e-10	5.6e-09	0.0644933	0.474289
BirthWeight	20022	NonBrain	globus_pallidus	Tissue_Fantom60	Brain	0.0547387	0.0474575	0.00668584	0.866983	0.122141	0.277132	-4.57e-09	2.5e-09	-1.82887	0.966291
BirthWeight	20022	NonBrain	granulocytes	SC_HPA81	NonBrain	0.0256477	0.0327565	0.00708046	1.27717	0.276066	0.316086	-2.15e-09	5.34e-09	-0.402179	0.656224
BirthWeight	20022	NonBrain	granulosa_cells	SC_HPA81	NonBrain	0.0206347	0.0381757	0.00621774	1.85007	0.301324	0.0049156	1.19e-08	5.79e-09	2.05588	0.0198968
BirthWeight	20022	NonBrain	heart_muscle	Tissue_Fantom60	NonBrain	0.0309227	0.0288297	0.0048913	0.932315	0.158179	0.669805	-5.41e-09	3.14e-09	-1.72367	0.957616
BirthWeight	20022	NonBrain	hepatocytes	SC_HPA81	NonBrain	0.0180025	0.0268676	0.00872371	1.49243	0.484582	0.309599	1.88e-09	9.27e-09	0.202462	0.419778
BirthWeight	20022	NonBrain	hippocampal_ca1_3	SC_Siletti31	Brain	0.139935	0.143995	0.0135378	1.02901	0.0967439	0.764407	-3.39e-09	2.18e-09	-1.55535	0.940069
BirthWeight	20022	NonBrain	hippocampal_ca4	SC_Siletti31	Brain	0.138661	0.165525	0.0132218	1.19374	0.0953535	0.0447678	-7.26e-10	2.21e-09	-0.328217	0.628626
BirthWeight	20022	NonBrain	hippocampal_dentate_gyrus	SC_Siletti31	Brain	0.133482	0.147194	0.011647	1.10272	0.0872547	0.24153	-2.49e-09	2.01e-09	-1.23536	0.891652
BirthWeight	20022	NonBrain	hippocampus	Tissue_Fantom60	Brain	0.0786124	0.0448291	0.00678281	0.570255	0.0862817	1.17e-06	-4.82e-09	1.81e-09	-2.66197	0.996116
BirthWeight	20022	NonBrain	hofbauer_cells	SC_HPA81	NonBrain	0.0165255	0.0315631	0.00645073	1.90997	0.39035	0.0198991	6.46e-09	7.51e-09	0.860105	0.194866
BirthWeight	20022	NonBrain	horizontal_cells	SC_HPA81	NonBrain	0.0305721	0.0302485	0.00490629	0.989416	0.160483	0.947404	-5.18e-09	3.1e-09	-1.6695	0.952491
BirthWeight	20022	NonBrain	inhibitory_neurons	SC_HPA81	Brain	0.130276	0.0841234	0.0102192	0.645731	0.0784426	8.25e-06	-3.23e-09	1.83e-09	-1.76117	0.960895
BirthWeight	20022	NonBrain	insular_cortex	Tissue_Fantom60	Brain	0.0878593	0.0560737	0.00792189	0.638221	0.0901657	5.47e-05	-3.41e-09	1.93e-09	-1.76503	0.961221
BirthWeight	20022	NonBrain	intestinal_goblet_cells	SC_HPA81	NonBrain	0.0197096	0.0263559	0.00512565	1.33721	0.260059	0.192557	-1.71e-09	4.95e-09	-0.345997	0.635327
BirthWeight	20022	NonBrain	ionocytes	SC_HPA81	NonBrain	0.0182453	0.0246119	0.00555392	1.34894	0.304403	0.248863	-1.14e-09	5.83e-09	-0.195491	0.577496
BirthWeight	20022	NonBrain	kidney	Tissue_Fantom60	NonBrain	0.0299752	0.0342153	0.00683696	1.14145	0.228087	0.536014	-1.96e-09	4.47e-09	-0.438279	0.669408
BirthWeight	20022	NonBrain	kupffer_cells	SC_HPA81	NonBrain	0.0210478	0.0450276	0.00738811	2.1393	0.351017	0.00156653	1.35e-08	6.83e-09	1.97294	0.0242513
BirthWeight	20022	NonBrain	lamp5_lhx6_and_chandelier	SC_Siletti31	Brain	0.133661	0.163054	0.0122906	1.21991	0.0919538	0.0179406	-6.43e-10	2.1e-09	-0.306675	0.620455
BirthWeight	20022	NonBrain	langerhans_cells	SC_HPA81	NonBrain	0.0240163	0.0340441	0.00695966	1.41754	0.289789	0.15155	3.17e-10	5.6e-09	0.0566453	0.477414
BirthWeight	20022	NonBrain	late_spermatids	SC_HPA81	NonBrain	0.0226307	0.0136471	0.00396656	0.603036	0.175274	0.0249173	-1.28e-08	3.44e-09	-3.72201	0.999901
BirthWeight	20022	NonBrain	leydig_cells	SC_HPA81	NonBrain	0.0264408	0.0375338	0.00603349	1.41954	0.228188	0.0696795	2.18e-09	4.43e-09	0.4933	0.3109
BirthWeight	20022	NonBrain	liver	Tissue_Fantom60	NonBrain	0.0203158	0.0246609	0.00620737	1.21387	0.305543	0.483378	-2.84e-09	5.82e-09	-0.488762	0.687495
BirthWeight	20022	NonBrain	locus_coeruleus	Tissue_Fantom60	Brain	0.0599341	0.0399732	0.00585643	0.666952	0.0977145	0.000979326	-6.26e-09	2.03e-09	-3.0894	0.998997
BirthWeight	20022	NonBrain	lower_rhombic_lip	SC_Siletti31	Brain	0.12087	0.139239	0.0110739	1.15198	0.0916189	0.0975431	-4.91e-09	2.17e-09	-2.25931	0.988068
BirthWeight	20022	NonBrain	lung	Tissue_Fantom60	NonBrain	0.0301121	0.0393544	0.00690789	1.30693	0.229406	0.184861	8.59e-10	4.53e-09	0.189685	0.424778
BirthWeight	20022	NonBrain	lymph_node	Tissue_Fantom60	NonBrain	0.0189373	0.0290021	0.00650199	1.53148	0.343344	0.119584	2.8e-09	6.62e-09	0.423643	0.335913
BirthWeight	20022	NonBrain	lymphatic_endothelial_cells	SC_HPA81	NonBrain	0.0315142	0.0279888	0.00573067	0.888135	0.181844	0.538949	-9.16e-09	3.51e-09	-2.60558	0.995414
BirthWeight	20022	NonBrain	macrophages	SC_HPA81	NonBrain	0.0224929	0.0317313	0.00666543	1.41072	0.296334	0.167578	-3.89e-10	5.74e-09	-0.0677139	0.526993
BirthWeight	20022	NonBrain	mammillary_body	SC_Siletti31	Brain	0.14141	0.145	0.0112281	1.02539	0.0794011	0.749255	-3.32e-09	1.85e-09	-1.79787	0.963901
BirthWeight	20022	NonBrain	medial_frontal_gyrus	Tissue_Fantom60	Brain	0.0906622	0.0509024	0.00749846	0.561451	0.0827076	1.4e-07	-5.12e-09	1.78e-09	-2.87556	0.997983
BirthWeight	20022	NonBrain	medial_temporal_gyrus	Tissue_Fantom60	Brain	0.0878218	0.0519608	0.00755099	0.591662	0.0859808	1.63e-06	-4.03e-09	1.85e-09	-2.17551	0.985204
BirthWeight	20022	NonBrain	medium_spiny_neuron	SC_Siletti31	Brain	0.131058	0.18205	0.0128522	1.38908	0.0980647	0.000180033	2.52e-09	2.2e-09	1.14361	0.126393
BirthWeight	20022	NonBrain	medulla_oblongata	Tissue_Fantom60	Brain	0.0543643	0.0373651	0.00571757	0.68731	0.105172	0.0036275	-7.06e-09	2.15e-09	-3.28268	0.999486
BirthWeight	20022	NonBrain	melanocytes	SC_HPA81	NonBrain	0.0227456	0.0370133	0.00585431	1.62728	0.257383	0.0145264	5.16e-09	4.92e-09	1.04861	0.147179
BirthWeight	20022	NonBrain	mesothelial_cells	SC_HPA81	NonBrain	0.0230784	0.0338764	0.00590488	1.46788	0.255862	0.0654832	7.21e-10	4.92e-09	0.146652	0.441703
BirthWeight	20022	NonBrain	mge_interneuron	SC_Siletti31	Brain	0.133352	0.161764	0.0119571	1.21306	0.0896655	0.0199932	-1.03e-09	1.98e-09	-0.517989	0.697767
BirthWeight	20022	NonBrain	microglia	SC_Siletti31	Brain	0.103532	0.198516	0.016463	1.91743	0.159013	4.68e-08	2.6e-09	3.48e-09	0.746244	0.22776
BirthWeight	20022	NonBrain	microglial_cells	SC_HPA81	Brain	0.0849454	0.102727	0.0124614	1.20933	0.146699	0.154422	1.58e-09	3.05e-09	0.518596	0.302021
BirthWeight	20022	NonBrain	midbrain_derived_inhibitory	SC_Siletti31	Brain	0.130064	0.159399	0.0125255	1.22554	0.0963023	0.0202257	-1.9e-10	2.11e-09	-0.0902407	0.535952
BirthWeight	20022	NonBrain	miscellaneous	SC_Siletti31	Brain	0.145742	0.161844	0.0129798	1.11048	0.0890599	0.216989	-2.73e-09	1.97e-09	-1.38615	0.917149
BirthWeight	20022	NonBrain	monocytes	SC_HPA81	NonBrain	0.0227323	0.0302892	0.00610381	1.33243	0.268508	0.217475	-3.41e-09	5.22e-09	-0.652873	0.743081
BirthWeight	20022	NonBrain	mucus_glandular_cells	SC_HPA81	NonBrain	0.0347379	0.0365208	0.00561776	1.05133	0.161718	0.750952	-4.69e-09	3.13e-09	-1.49957	0.933137
BirthWeight	20022	NonBrain	muller_glia_cells	SC_HPA81	Brain	0.0299485	0.0407715	0.00728654	1.36139	0.243302	0.135466	2.48e-09	4.71e-09	0.527551	0.298906
BirthWeight	20022	NonBrain	nk_cells	SC_HPA81	NonBrain	0.0211508	0.0303867	0.00758061	1.43667	0.358408	0.222469	-1.38e-09	6.97e-09	-0.197992	0.578474
BirthWeight	20022	NonBrain	nucleus_accumbens	Tissue_Fantom60	Brain	0.0863423	0.0529449	0.00778675	0.613198	0.0901847	1.53e-05	-3.88e-09	1.92e-09	-2.01756	0.978182
BirthWeight	20022	NonBrain	occipital_cortex	Tissue_Fantom60	Brain	0.0874619	0.0620544	0.00772782	0.709503	0.0883564	0.00088329	-2.85e-09	1.87e-09	-1.52233	0.936037
BirthWeight	20022	NonBrain	occipital_lobe	Tissue_Fantom60	Brain	0.0744791	0.0455315	0.00706937	0.611332	0.0949175	3.33e-05	-3.57e-09	1.97e-09	-1.81186	0.964996
BirthWeight	20022	NonBrain	occipital_pole	Tissue_Fantom60	Brain	0.0640617	0.0494749	0.00719249	0.7723	0.112274	0.0415774	-2.81e-09	2.35e-09	-1.19553	0.88406
BirthWeight	20022	NonBrain	olfactory_bulb	Tissue_Fantom60	Brain	0.0810752	0.0467862	0.00728011	0.577072	0.0897945	2.61e-06	-4.55e-09	1.94e-09	-2.35147	0.99065
BirthWeight	20022	NonBrain	oligodendrocyte	SC_Siletti31	Brain	0.110615	0.178983	0.0120293	1.61807	0.108749	2.22e-08	8.59e-10	2.49e-09	0.3452	0.364972
BirthWeight	20022	NonBrain	oligodendrocyte_precursor	SC_Siletti31	Brain	0.143097	0.169872	0.0135854	1.18712	0.0949386	0.047595	-9e-10	2.19e-09	-0.411929	0.659804
BirthWeight	20022	NonBrain	oligodendrocyte_precursor_cells	SC_HPA81	Brain	0.118565	0.09171	0.0107711	0.773497	0.0908456	0.0129279	-1.66e-09	1.99e-09	-0.833294	0.79766
BirthWeight	20022	NonBrain	oligodendrocytes	SC_HPA81	Brain	0.0828181	0.0766364	0.0102784	0.925358	0.124108	0.547743	-2.25e-09	2.61e-09	-0.861576	0.805539
BirthWeight	20022	NonBrain	oocytes	SC_HPA81	NonBrain	0.0313899	0.0417288	0.00648945	1.32937	0.206737	0.109764	2.16e-09	4.01e-09	0.538644	0.295066
BirthWeight	20022	NonBrain	ovarian_stromal_cells	SC_HPA81	NonBrain	0.0184056	0.0320071	0.00593185	1.73898	0.322284	0.0219868	8.07e-09	6.16e-09	1.30908	0.0952534
BirthWeight	20022	NonBrain	ovary	Tissue_Fantom60	NonBrain	0.0325276	0.0411094	0.00715007	1.26383	0.219816	0.230518	9.7e-10	4.31e-09	0.225056	0.410968
BirthWeight	20022	NonBrain	pancreas	Tissue_Fantom60	NonBrain	0.0245347	0.0414539	0.00715542	1.6896	0.291645	0.0193271	5.91e-09	5.63e-09	1.04977	0.146913
BirthWeight	20022	NonBrain	pancreatic_endocrine_cells	SC_HPA81	NonBrain	0.0155013	0.0251686	0.00472364	1.62364	0.304724	0.0409078	1.2e-09	5.93e-09	0.203	0.419568
BirthWeight	20022	NonBrain	paneth_cells	SC_HPA81	NonBrain	0.0161898	0.026634	0.00534584	1.64511	0.330198	0.0500143	4.93e-09	6.27e-09	0.785974	0.215941
BirthWeight	20022	NonBrain	paracentral_gyrus	Tissue_Fantom60	Brain	0.0819366	0.0543606	0.00737977	0.663448	0.0900669	0.000185272	-3.21e-09	1.93e-09	-1.66355	0.951899
BirthWeight	20022	NonBrain	parietal_lobe	Tissue_Fantom60	Brain	0.0870495	0.0550795	0.00787677	0.632737	0.090486	4.67e-05	-3.99e-09	1.97e-09	-2.02779	0.978709
BirthWeight	20022	NonBrain	peritubular_cells	SC_HPA81	NonBrain	0.0281217	0.0337178	0.00565835	1.199	0.201209	0.324464	-3.03e-09	3.99e-09	-0.761157	0.776718
BirthWeight	20022	NonBrain	pituitary_gland	Tissue_Fantom60	Brain	0.0577956	0.0625252	0.0117842	1.08183	0.203894	0.688793	3.73e-09	4.11e-09	0.908689	0.181757
BirthWeight	20022	NonBrain	placenta	Tissue_Fantom60	NonBrain	0.0290214	0.0558676	0.0106607	1.92505	0.367341	0.0119907	1.21e-08	7.16e-09	1.688	0.0457061
BirthWeight	20022	NonBrain	plasma_cells	SC_HPA81	NonBrain	0.0165431	0.0389307	0.00810953	2.35329	0.490207	0.00708015	1.49e-08	9.55e-09	1.56334	0.0589867
BirthWeight	20022	NonBrain	pons	Tissue_Fantom60	Brain	0.0621481	0.0404847	0.00580023	0.651423	0.0933291	0.000344381	-5e-09	1.97e-09	-2.53647	0.994401
BirthWeight	20022	NonBrain	postcentral_gyrus	Tissue_Fantom60	Brain	0.0690916	0.0481945	0.00727469	0.697545	0.105291	0.00391395	-3.93e-09	2.22e-09	-1.77244	0.961839
BirthWeight	20022	NonBrain	prostate	Tissue_Fantom60	NonBrain	0.0363825	0.0418532	0.00608366	1.15037	0.167214	0.366257	-2.25e-09	3.26e-09	-0.691148	0.755264
BirthWeight	20022	NonBrain	prostatic_glandular_cells	SC_HPA81	NonBrain	0.0289204	0.0285474	0.00570582	0.987104	0.197294	0.947878	-4.51e-09	3.84e-09	-1.17644	0.880291
BirthWeight	20022	NonBrain	proximal_enterocytes	SC_HPA81	NonBrain	0.0154134	0.0133798	0.00391224	0.868062	0.25382	0.604663	-9.99e-09	4.92e-09	-2.03216	0.978931
BirthWeight	20022	NonBrain	proximal_tubular_cells	SC_HPA81	NonBrain	0.017641	0.015331	0.00460953	0.869053	0.261296	0.617054	-9.41e-09	5.16e-09	-1.82415	0.965935
BirthWeight	20022	NonBrain	putamen	Tissue_Fantom60	Brain	0.0674164	0.0480472	0.00808622	0.712693	0.119944	0.0186862	-1.51e-09	2.59e-09	-0.584873	0.720683
BirthWeight	20022	NonBrain	retina	Tissue_Fantom60	NonBrain	0.0485119	0.0456169	0.00805357	0.940324	0.166012	0.718333	-4.52e-09	3.29e-09	-1.37377	0.915244
BirthWeight	20022	NonBrain	rod_photoreceptor_cells	SC_HPA81	NonBrain	0.0323409	0.0429176	0.00625593	1.32704	0.193437	0.0913042	7.64e-10	3.78e-09	0.20199	0.419962
BirthWeight	20022	NonBrain	salivary_duct_cells	SC_HPA81	NonBrain	0.0326873	0.0345074	0.00637219	1.05568	0.194944	0.77492	-5.95e-09	3.88e-09	-1.53243	0.937292
BirthWeight	20022	NonBrain	salivary_gland	Tissue_Fantom60	NonBrain	0.0259443	0.0338894	0.00524613	1.30624	0.202208	0.127537	9.29e-10	3.9e-09	0.238541	0.405731
BirthWeight	20022	NonBrain	schwann_cells	SC_HPA81	NonBrain	0.03102	0.0358534	0.00755109	1.15582	0.243427	0.521715	-3.35e-09	4.79e-09	-0.700823	0.758293
BirthWeight	20022	NonBrain	secretory_cells	SC_HPA81	NonBrain	0.0188797	0.0384377	0.00927908	2.03592	0.491484	0.035667	1.02e-08	9.55e-09	1.07299	0.141637
BirthWeight	20022	NonBrain	seminal_vesicle	Tissue_Fantom60	NonBrain	0.0379876	0.0573788	0.0100253	1.51046	0.263911	0.0534143	6.15e-09	5.11e-09	1.20242	0.1146
BirthWeight	20022	NonBrain	serous_glandular_cells	SC_HPA81	NonBrain	0.0248953	0.0386532	0.00605314	1.55263	0.243144	0.0213705	5.39e-09	4.7e-09	1.14684	0.125723
BirthWeight	20022	NonBrain	sertoli_cells	SC_HPA81	NonBrain	0.0221085	0.0266644	0.00502509	1.20607	0.227293	0.363819	-2.34e-09	4.39e-09	-0.53206	0.702658
BirthWeight	20022	NonBrain	skeletal_muscle	Tissue_Fantom60	NonBrain	0.0308145	0.0387201	0.00636561	1.25656	0.206579	0.214027	-1.55e-10	4.04e-09	-0.0383708	0.515304
BirthWeight	20022	NonBrain	skeletal_myocytes	SC_HPA81	NonBrain	0.0285471	0.0460791	0.00696586	1.61414	0.244012	0.0129102	6.75e-09	4.78e-09	1.41248	0.0789045
BirthWeight	20022	NonBrain	small_intestine	Tissue_Fantom60	NonBrain	0.0248393	0.0413866	0.00943559	1.66618	0.379865	0.0812205	6.91e-09	7.33e-09	0.942715	0.172913
BirthWeight	20022	NonBrain	smooth_muscle	Tissue_Fantom60	NonBrain	0.0467238	0.0477307	0.0062829	1.02155	0.134469	0.872618	-4.19e-09	2.67e-09	-1.56582	0.941305
BirthWeight	20022	NonBrain	smooth_muscle_cells	SC_HPA81	NonBrain	0.0320528	0.0429773	0.00773633	1.34083	0.241362	0.159428	4.08e-10	4.71e-09	0.0866236	0.465485
BirthWeight	20022	NonBrain	spermatocytes	SC_HPA81	NonBrain	0.0195796	0.0272957	0.00551103	1.39409	0.281468	0.162955	3e-09	5.49e-09	0.545507	0.292702
BirthWeight	20022	NonBrain	spermatogonia	SC_HPA81	NonBrain	0.0181884	0.0265397	0.00558135	1.45916	0.306863	0.136185	5.58e-11	6.05e-09	0.00921902	0.496322
BirthWeight	20022	NonBrain	spinal_cord	Tissue_Fantom60	Brain	0.0554796	0.0525299	0.00787174	0.946831	0.141885	0.708971	-1.92e-09	2.89e-09	-0.66615	0.747342
BirthWeight	20022	NonBrain	splatter	SC_Siletti31	Brain	0.121208	0.178279	0.0142281	1.47086	0.117386	0.000103326	3.19e-09	2.64e-09	1.2121	0.112737
BirthWeight	20022	NonBrain	spleen	Tissue_Fantom60	NonBrain	0.0226386	0.02566	0.00513404	1.13347	0.226783	0.555468	-4.14e-09	4.42e-09	-0.936356	0.825455
BirthWeight	20022	NonBrain	squamous_epithelial_cells	SC_HPA81	NonBrain	0.0154014	0.0225888	0.00523277	1.46668	0.33976	0.170878	4.44e-10	6.53e-09	0.0680966	0.472854
BirthWeight	20022	NonBrain	substantia_nigra	Tissue_Fantom60	Brain	0.0493107	0.0503556	0.00889882	1.02119	0.180464	0.906517	-2.06e-09	3.64e-09	-0.565126	0.714006
BirthWeight	20022	NonBrain	suprabasal_keratinocytes	SC_HPA81	NonBrain	0.0171738	0.0222934	0.00602521	1.2981	0.350837	0.394985	-2.66e-09	6.81e-09	-0.39052	0.651924
BirthWeight	20022	NonBrain	syncytiotrophoblasts	SC_HPA81	NonBrain	0.0201132	0.0360354	0.00701497	1.79163	0.348774	0.0237865	5.96e-09	6.71e-09	0.887468	0.187413
BirthWeight	20022	NonBrain	t_cells	SC_HPA81	NonBrain	0.0204205	0.0288719	0.0076139	1.41387	0.372855	0.267212	-1.86e-09	7.27e-09	-0.255915	0.600992
BirthWeight	20022	NonBrain	temporal_cortex	Tissue_Fantom60	Brain	0.0635826	0.0481809	0.00697819	0.757768	0.10975	0.0263854	-3.36e-09	2.27e-09	-1.47911	0.930444
BirthWeight	20022	NonBrain	testis	Tissue_Fantom60	NonBrain	0.0235459	0.0218664	0.00498925	0.92867	0.211894	0.736558	-7.59e-09	4.18e-09	-1.81597	0.965312
BirthWeight	20022	NonBrain	thalamic_excitatory	SC_Siletti31	Brain	0.133378	0.162513	0.0123959	1.21844	0.0929376	0.0203417	-1.17e-10	2.18e-09	-0.053884	0.521486
BirthWeight	20022	NonBrain	thalamus	Tissue_Fantom60	Brain	0.0588518	0.0557052	0.00851893	0.946533	0.144752	0.711926	-2.45e-09	2.94e-09	-0.830959	0.797002
BirthWeight	20022	NonBrain	thymus	Tissue_Fantom60	NonBrain	0.0230509	0.0330761	0.00624324	1.43492	0.270846	0.106726	1.47e-10	5.27e-09	0.0278467	0.488892
BirthWeight	20022	NonBrain	thyroid_gland	Tissue_Fantom60	NonBrain	0.0323221	0.0400578	0.00686613	1.23933	0.212428	0.263405	5.63e-10	4.17e-09	0.134959	0.446322
BirthWeight	20022	NonBrain	tongue	Tissue_Fantom60	NonBrain	0.0223478	0.0262061	0.00437002	1.17264	0.195545	0.377139	-2.39e-09	3.79e-09	-0.630585	0.735844
BirthWeight	20022	NonBrain	tonsil	Tissue_Fantom60	NonBrain	0.0178638	0.0258871	0.005704	1.44914	0.319305	0.157361	-1.87e-09	6.19e-09	-0.302931	0.619029
BirthWeight	20022	NonBrain	undifferentiated_cells	SC_HPA81	NonBrain	0.0159826	0.0287752	0.00481062	1.8004	0.300991	0.00780578	7.54e-09	5.67e-09	1.32957	0.0918301
BirthWeight	20022	NonBrain	upper_layer_intratelencephalic	SC_Siletti31	Brain	0.12668	0.158364	0.01168	1.25012	0.0922011	0.00671851	-1.46e-09	2.01e-09	-0.727949	0.766677
BirthWeight	20022	NonBrain	upper_rhombic_lip	SC_Siletti31	Brain	0.104736	0.171568	0.0139715	1.63811	0.133398	4.45e-06	1.78e-09	2.7e-09	0.659079	0.254922
BirthWeight	20022	NonBrain	urinary_bladder	Tissue_Fantom60	NonBrain	0.0360071	0.0377466	0.00549901	1.04831	0.15272	0.751925	-5.11e-09	3.03e-09	-1.6883	0.954323
BirthWeight	20022	NonBrain	vagina	Tissue_Fantom60	NonBrain	0.0370658	0.044152	0.00579308	1.19118	0.156292	0.219733	-2.22e-09	3.05e-09	-0.729189	0.767057
BirthWeight	20022	NonBrain	vascular	SC_Siletti31	Brain	0.108495	0.213583	0.0157895	1.9686	0.145532	3.98e-10	1.43e-09	3.09e-09	0.461961	0.322055
BMD	78	NonBrain	adipocytes	SC_HPA81	NonBrain	0.0324001	0.0412454	0.00659193	1.273	0.203454	0.176237	-1.92e-09	9.32e-09	-0.205786	0.581521
BMD	78	NonBrain	adipose_tissue	Tissue_Fantom60	NonBrain	0.0370175	0.049218	0.00876963	1.32959	0.236905	0.161232	5.12e-09	1.1e-08	0.463636	0.321454
BMD	78	NonBrain	alveolar_cells_type_1	SC_HPA81	NonBrain	0.029222	0.0477372	0.00728969	1.6336	0.249459	0.0136568	1.08e-08	1.17e-08	0.918443	0.179194
BMD	78	NonBrain	alveolar_cells_type_2	SC_HPA81	NonBrain	0.0281096	0.0409082	0.00867922	1.45531	0.308763	0.141582	5.04e-09	1.43e-08	0.352156	0.36236
BMD	78	NonBrain	amygdala	Tissue_Fantom60	Brain	0.0845482	0.0664587	0.01265	0.786046	0.149618	0.153235	-3.96e-09	7.86e-09	-0.503525	0.692702
BMD	78	NonBrain	amygdala_excitatory	SC_Siletti31	Brain	0.152877	0.147873	0.0154523	0.967272	0.101077	0.744895	-6.16e-09	5.17e-09	-1.19104	0.883181
BMD	78	NonBrain	appendix	Tissue_Fantom60	NonBrain	0.0220803	0.0465605	0.0114464	2.10869	0.518401	0.0378031	3.84e-08	2.46e-08	1.55786	0.0596337
BMD	78	NonBrain	astrocyte	SC_Siletti31	Brain	0.119646	0.18259	0.0156105	1.5261	0.130473	5.82e-05	5.53e-09	6.98e-09	0.792053	0.214165
BMD	78	NonBrain	astrocytes	SC_HPA81	Brain	0.0932178	0.0820392	0.00823302	0.880081	0.0883203	0.176615	-1.03e-08	4.53e-09	-2.27616	0.988582
BMD	78	NonBrain	b_cells	SC_HPA81	NonBrain	0.0223649	0.0213098	0.00853282	0.95282	0.381527	0.900677	-1.65e-08	1.75e-08	-0.942287	0.826977
BMD	78	NonBrain	basal_keratinocytes	SC_HPA81	NonBrain	0.0193858	0.0254158	0.00565266	1.31105	0.291587	0.282771	1.75e-09	1.33e-08	0.131703	0.44761
BMD	78	NonBrain	basal_prostatic_cells	SC_HPA81	NonBrain	0.0245169	0.0481563	0.00896303	1.96421	0.365586	0.0109982	2.97e-08	1.72e-08	1.72663	0.0421167
BMD	78	NonBrain	basal_respiratory_cells	SC_HPA81	NonBrain	0.0150588	0.0400992	0.0109015	2.66284	0.723928	0.026754	6.35e-08	3.44e-08	1.84611	0.0324378
BMD	78	NonBrain	basal_squamous_epithelial_cells	SC_HPA81	NonBrain	0.0193268	0.0273192	0.00482162	1.41354	0.249479	0.0852402	6.64e-09	1.11e-08	0.598483	0.274759
BMD	78	NonBrain	bergmann_glia	SC_Siletti31	Brain	0.116902	0.163458	0.013208	1.39825	0.112983	0.000358803	2.22e-11	6.11e-09	0.0036433	0.498547
BMD	78	NonBrain	bipolar_cells	SC_HPA81	NonBrain	0.0309354	0.0398476	0.00659179	1.28809	0.213082	0.181428	1.92e-09	9.87e-09	0.194068	0.423061
BMD	78	NonBrain	breast	Tissue_Fantom60	NonBrain	0.0294	0.0616326	0.0218972	2.09635	0.744803	0.140786	3.87e-08	3.46e-08	1.11835	0.131709
BMD	78	NonBrain	breast_glandular_cells	SC_HPA81	NonBrain	0.0196947	0.0583293	0.0249783	2.96168	1.26828	0.120864	7.71e-08	5.86e-08	1.31689	0.0939385
BMD	78	NonBrain	breast_myoepithelial_cells	SC_HPA81	NonBrain	0.0160611	0.0242715	0.0065672	1.51119	0.408888	0.20896	5.88e-09	1.86e-08	0.315738	0.376101
BMD	78	NonBrain	cardiomyocytes	SC_HPA81	NonBrain	0.0300831	0.0285564	0.00597352	0.94925	0.198567	0.796485	-8.15e-09	9.2e-09	-0.885106	0.81195
BMD	78	NonBrain	caudate	Tissue_Fantom60	Brain	0.0752949	0.0708545	0.0122722	0.941026	0.162989	0.716747	4.07e-09	8.18e-09	0.496888	0.309634
BMD	78	NonBrain	cerebellar_inhibitory	SC_Siletti31	Brain	0.115841	0.09858	0.0107121	0.850996	0.0924727	0.10743	-2.1e-08	4.91e-09	-4.28514	0.999991
BMD	78	NonBrain	cerebellum	Tissue_Fantom60	Brain	0.0657439	0.0673398	0.00868218	1.02427	0.132061	0.853511	3.49e-09	6.3e-09	0.552916	0.29016
BMD	78	NonBrain	cervix	Tissue_Fantom60	NonBrain	0.0404433	0.0865766	0.0214543	2.14069	0.530478	0.0336285	4.11e-08	2.5e-08	1.64255	0.0502382
BMD	78	NonBrain	cge_interneuron	SC_Siletti31	Brain	0.123059	0.110674	0.0106702	0.899358	0.0867085	0.251247	-1.66e-08	4.82e-09	-3.45046	0.99972
BMD	78	NonBrain	cholangiocytes	SC_HPA81	NonBrain	0.0226013	0.0280331	0.00464486	1.24033	0.205513	0.238749	5.44e-10	9.55e-09	0.0569845	0.477279
BMD	78	NonBrain	choroid_plexus	SC_Siletti31	Brain	0.121924	0.200295	0.0232063	1.64278	0.190334	0.000809317	1.65e-08	1.04e-08	1.58836	0.0561019
BMD	78	NonBrain	ciliated_cells	SC_HPA81	NonBrain	0.0300326	0.0652819	0.0288505	2.1737	0.960639	0.220814	4.86e-08	4.47e-08	1.08857	0.138173
BMD	78	NonBrain	club_cells	SC_HPA81	NonBrain	0.0229831	0.0372948	0.00695461	1.62271	0.302596	0.041629	1.65e-08	1.42e-08	1.16208	0.122602
BMD	78	NonBrain	collecting_duct_cells	SC_HPA81	NonBrain	0.0219298	0.0321113	0.0071004	1.46428	0.323779	0.151958	9.96e-09	1.51e-08	0.657448	0.255447
BMD	78	NonBrain	colon	Tissue_Fantom60	NonBrain	0.0261706	0.0548255	0.011825	2.09493	0.451845	0.0171416	4.14e-08	2.12e-08	1.9474	0.0257432
BMD	78	NonBrain	committed_oligodendrocyte_precursor	SC_Siletti31	Brain	0.117432	0.158665	0.0138071	1.35112	0.117575	0.00280683	-3.37e-09	6.59e-09	-0.511599	0.695534
BMD	78	NonBrain	cone_photoreceptor_cells	SC_HPA81	NonBrain	0.0314326	0.0273842	0.00574368	0.871202	0.18273	0.477577	-1.4e-08	8.39e-09	-1.6699	0.95253
BMD	78	NonBrain	corpus_callosum	Tissue_Fantom60	Brain	0.0557341	0.0736514	0.0156218	1.32148	0.280292	0.250883	7.31e-09	1.37e-08	0.533104	0.296981
BMD	78	NonBrain	cytotrophoblasts	SC_HPA81	NonBrain	0.0174654	0.0195919	0.00888451	1.12176	0.508692	0.809418	-9.4e-09	2.33e-08	-0.403212	0.656604
BMD	78	NonBrain	deep_layer_corticothalamic_and_6b	SC_Siletti31	Brain	0.141697	0.133775	0.0125721	0.94409	0.088725	0.52818	-9.69e-09	4.98e-09	-1.94682	0.974222
BMD	78	NonBrain	deep_layer_intratelencephalic	SC_Siletti31	Brain	0.135613	0.124834	0.0117906	0.920517	0.0869429	0.355081	-1.38e-08	4.62e-09	-2.98574	0.998586
BMD	78	NonBrain	deep_layer_near_projecting	SC_Siletti31	Brain	0.131748	0.128226	0.0114359	0.973265	0.0868014	0.758417	-7.9e-09	4.7e-09	-1.68314	0.953826
BMD	78	NonBrain	dendritic_cells	SC_HPA81	NonBrain	0.0229642	0.0243225	0.00471138	1.05915	0.205162	0.772367	-1.41e-08	9.65e-09	-1.46026	0.927891
BMD	78	NonBrain	distal_enterocytes	SC_HPA81	NonBrain	0.0181986	0.0220801	0.00458573	1.21328	0.251982	0.395868	-1.09e-09	1.15e-08	-0.0945419	0.537661
BMD	78	NonBrain	distal_tubular_cells	SC_HPA81	NonBrain	0.0128975	0.0216848	0.005378	1.68132	0.41698	0.0998398	2.26e-08	1.91e-08	1.17882	0.119235
BMD	78	NonBrain	ductal_cells	SC_HPA81	NonBrain	0.0188561	0.0306754	0.00829772	1.62682	0.440056	0.155392	1.63e-08	2.03e-08	0.802133	0.211238
BMD	78	NonBrain	ductus_deferens	Tissue_Fantom60	NonBrain	0.0337829	0.056785	0.0101507	1.68088	0.30047	0.0284707	2.22e-08	1.45e-08	1.53389	0.0625284
BMD	78	NonBrain	early_spermatids	SC_HPA81	NonBrain	0.0234498	0.0246569	0.0060395	1.05147	0.25755	0.840896	5.17e-09	1.2e-08	0.432349	0.332744
BMD	78	NonBrain	eccentric_medium_spiny_neuron	SC_Siletti31	Brain	0.13994	0.139241	0.0121872	0.995002	0.0870886	0.954146	-9.08e-09	5.05e-09	-1.79759	0.963879
BMD	78	NonBrain	endometrial_stromal_cells	SC_HPA81	NonBrain	0.0307095	0.0750052	0.0236966	2.44241	0.771639	0.0638988	5.51e-08	3.61e-08	1.52727	0.0633472
BMD	78	NonBrain	endometrium	Tissue_Fantom60	NonBrain	0.052117	0.0942636	0.0203577	1.80869	0.390616	0.0399674	2.7e-08	1.86e-08	1.44928	0.0736303
BMD	78	NonBrain	endothelial_cells	SC_HPA81	NonBrain	0.0343071	0.0518168	0.00811565	1.51038	0.236559	0.0316852	1.2e-08	1.09e-08	1.10265	0.13509
BMD	78	NonBrain	enteroendocrine_cells	SC_HPA81	NonBrain	0.0198909	0.0253925	0.00532079	1.27659	0.267498	0.30276	3.14e-09	1.25e-08	0.252318	0.400398
BMD	78	NonBrain	ependymal	SC_Siletti31	Brain	0.112796	0.177093	0.0221274	1.57003	0.196172	0.00310183	1.36e-08	1.04e-08	1.31253	0.0946702
BMD	78	NonBrain	epididymis	Tissue_Fantom60	NonBrain	0.035524	0.0683293	0.0218732	1.92347	0.615732	0.134757	3.75e-08	2.88e-08	1.3035	0.096202
BMD	78	NonBrain	erythroid_cells	SC_HPA81	NonBrain	0.0152376	0.0166351	0.00458176	1.09171	0.300687	0.759975	-1.12e-08	1.38e-08	-0.813398	0.792005
BMD	78	NonBrain	esophagus	Tissue_Fantom60	NonBrain	0.0233245	0.0355276	0.00683569	1.52319	0.293069	0.0719889	1.19e-08	1.35e-08	0.880061	0.189413
BMD	78	NonBrain	excitatory_neurons	SC_HPA81	Brain	0.124029	0.0982377	0.0102259	0.792054	0.0824475	0.0108792	-5.32e-09	4.51e-09	-1.17728	0.880457
BMD	78	NonBrain	exocrine_glandular_cells	SC_HPA81	NonBrain	0.0166966	0.0216585	0.0060568	1.29718	0.362757	0.413535	-5.45e-09	1.68e-08	-0.324287	0.62714
BMD	78	NonBrain	extravillous_trophoblasts	SC_HPA81	NonBrain	0.0168746	0.0209581	0.00755945	1.24199	0.447979	0.586179	-5.37e-09	2.06e-08	-0.260284	0.602677
BMD	78	NonBrain	fibroblast	SC_Siletti31	Brain	0.120058	0.244529	0.0209922	2.03675	0.17485	3.13e-08	3e-08	9.74e-09	3.07711	0.00104508
BMD	78	NonBrain	fibroblasts	SC_HPA81	NonBrain	0.0327441	0.085751	0.0230437	2.61882	0.70375	0.0219358	6.17e-08	3.28e-08	1.88002	0.0300525
BMD	78	NonBrain	frontal_lobe	Tissue_Fantom60	Brain	0.0907069	0.0743259	0.0130385	0.819408	0.143743	0.210289	-1.29e-09	7.71e-09	-0.167453	0.566493
BMD	78	NonBrain	gallbladder	Tissue_Fantom60	NonBrain	0.032846	0.0537061	0.00976569	1.63509	0.297318	0.0328578	1.76e-08	1.39e-08	1.2662	0.102721
BMD	78	NonBrain	gastric_mucus_secreting_cells	SC_HPA81	NonBrain	0.0203007	0.0318722	0.00669092	1.57	0.32959	0.0864362	1.12e-08	1.55e-08	0.724607	0.234347
BMD	78	NonBrain	glandular_and_luminal_cells	SC_HPA81	NonBrain	0.0296382	0.0672614	0.0237703	2.26941	0.802016	0.113713	4.43e-08	3.74e-08	1.1848	0.118048
BMD	78	NonBrain	globus_pallidus	Tissue_Fantom60	Brain	0.0547387	0.0466419	0.00602027	0.852083	0.109982	0.183877	-1.36e-08	5.38e-09	-2.5208	0.994146
BMD	78	NonBrain	granulocytes	SC_HPA81	NonBrain	0.0256477	0.0365188	0.00851054	1.42386	0.331825	0.201394	7.1e-09	1.55e-08	0.457257	0.323743
BMD	78	NonBrain	granulosa_cells	SC_HPA81	NonBrain	0.0206347	0.0381513	0.00787197	1.84889	0.381491	0.0292067	3.24e-08	1.8e-08	1.80245	0.0357374
BMD	78	NonBrain	heart_muscle	Tissue_Fantom60	NonBrain	0.0309227	0.0239878	0.00523279	0.775736	0.169222	0.188872	-1.73e-08	8.12e-09	-2.13101	0.983456
BMD	78	NonBrain	hepatocytes	SC_HPA81	NonBrain	0.0180025	0.0655715	0.0293814	3.64235	1.63207	0.105192	1.09e-07	7.48e-08	1.46226	0.0718345
BMD	78	NonBrain	hippocampal_ca1_3	SC_Siletti31	Brain	0.139935	0.149221	0.0155514	1.06636	0.111133	0.551721	-1.61e-09	5.7e-09	-0.281778	0.610943
BMD	78	NonBrain	hippocampal_ca4	SC_Siletti31	Brain	0.138661	0.136412	0.0129918	0.983778	0.0936947	0.861955	-9.14e-09	5.16e-09	-1.77173	0.96178
BMD	78	NonBrain	hippocampal_dentate_gyrus	SC_Siletti31	Brain	0.133482	0.129511	0.0111868	0.970248	0.083807	0.721301	-9.7e-09	4.67e-09	-2.07905	0.981193
BMD	78	NonBrain	hippocampus	Tissue_Fantom60	Brain	0.0786124	0.0794306	0.0126129	1.01041	0.160444	0.948207	6.72e-09	8.17e-09	0.821719	0.205619
BMD	78	NonBrain	hofbauer_cells	SC_HPA81	NonBrain	0.0165255	0.033022	0.0072484	1.99825	0.43862	0.0198477	3.21e-08	1.97e-08	1.63193	0.0513466
BMD	78	NonBrain	horizontal_cells	SC_HPA81	NonBrain	0.0305721	0.0271357	0.004267	0.887597	0.139572	0.421106	-1.4e-08	6.5e-09	-2.15447	0.984398
BMD	78	NonBrain	inhibitory_neurons	SC_HPA81	Brain	0.130276	0.104933	0.0101464	0.805467	0.0778841	0.0113676	-5.13e-09	4.2e-09	-1.2227	0.889279
BMD	78	NonBrain	insular_cortex	Tissue_Fantom60	Brain	0.0878593	0.0680547	0.0096697	0.774588	0.110059	0.0427133	-5.25e-09	5.91e-09	-0.88828	0.812805
BMD	78	NonBrain	intestinal_goblet_cells	SC_HPA81	NonBrain	0.0197096	0.0239124	0.00602603	1.21324	0.305741	0.483506	-7.01e-10	1.36e-08	-0.0515539	0.520558
BMD	78	NonBrain	ionocytes	SC_HPA81	NonBrain	0.0182453	0.0281468	0.00853355	1.54269	0.467713	0.248922	1.37e-08	2.18e-08	0.626038	0.265645
BMD	78	NonBrain	kidney	Tissue_Fantom60	NonBrain	0.0299752	0.0394415	0.00767156	1.3158	0.25593	0.214017	8.75e-09	1.19e-08	0.738012	0.230254
BMD	78	NonBrain	kupffer_cells	SC_HPA81	NonBrain	0.0210478	0.0325305	0.00540141	1.54555	0.256627	0.0280908	1.26e-08	1.15e-08	1.09293	0.137212
BMD	78	NonBrain	lamp5_lhx6_and_chandelier	SC_Siletti31	Brain	0.133661	0.127343	0.0119831	0.95273	0.0896528	0.597335	-1.27e-08	4.88e-09	-2.61127	0.99549
BMD	78	NonBrain	langerhans_cells	SC_HPA81	NonBrain	0.0240163	0.0355183	0.00769562	1.47893	0.320433	0.128673	8.73e-09	1.47e-08	0.595603	0.27572
BMD	78	NonBrain	late_spermatids	SC_HPA81	NonBrain	0.0226307	0.0273108	0.0067836	1.20681	0.299753	0.48612	3.78e-09	1.39e-08	0.271886	0.392855
BMD	78	NonBrain	leydig_cells	SC_HPA81	NonBrain	0.0264408	0.0475982	0.00982666	1.80018	0.371647	0.0356716	2.4e-08	1.76e-08	1.36722	0.085778
BMD	78	NonBrain	liver	Tissue_Fantom60	NonBrain	0.0203158	0.042179	0.00984633	2.07616	0.484663	0.024786	3.96e-08	2.21e-08	1.79498	0.0363281
BMD	78	NonBrain	locus_coeruleus	Tissue_Fantom60	Brain	0.0599341	0.0741262	0.0137817	1.23679	0.229947	0.303608	1.19e-08	1.12e-08	1.05945	0.144697
BMD	78	NonBrain	lower_rhombic_lip	SC_Siletti31	Brain	0.12087	0.149526	0.0149044	1.23709	0.12331	0.0568264	3.04e-09	6.66e-09	0.456458	0.32403
BMD	78	NonBrain	lung	Tissue_Fantom60	NonBrain	0.0301121	0.0375683	0.00746949	1.24761	0.248056	0.310751	3.73e-09	1.16e-08	0.321884	0.37377
BMD	78	NonBrain	lymph_node	Tissue_Fantom60	NonBrain	0.0189373	0.0336972	0.00896437	1.77941	0.473372	0.105233	2.6e-08	2.21e-08	1.17628	0.119742
BMD	78	NonBrain	lymphatic_endothelial_cells	SC_HPA81	NonBrain	0.0315142	0.0453354	0.00923344	1.43857	0.292993	0.132305	7.32e-09	1.35e-08	0.54152	0.294075
BMD	78	NonBrain	macrophages	SC_HPA81	NonBrain	0.0224929	0.044395	0.00886306	1.97373	0.394038	0.0125148	3.2e-08	1.8e-08	1.78059	0.0374896
BMD	78	NonBrain	mammillary_body	SC_Siletti31	Brain	0.14141	0.129875	0.011418	0.918427	0.0807435	0.313206	-1.03e-08	4.2e-09	-2.45814	0.993017
BMD	78	NonBrain	medial_frontal_gyrus	Tissue_Fantom60	Brain	0.0906622	0.0713907	0.01396	0.787436	0.153979	0.170013	-4.68e-09	8.21e-09	-0.570378	0.715789
BMD	78	NonBrain	medial_temporal_gyrus	Tissue_Fantom60	Brain	0.0878218	0.0773129	0.0141362	0.880337	0.160964	0.456229	1.11e-09	8.5e-09	0.130087	0.448249
BMD	78	NonBrain	medium_spiny_neuron	SC_Siletti31	Brain	0.131058	0.14093	0.0114799	1.07533	0.0875938	0.386405	-3.48e-09	4.56e-09	-0.762546	0.777133
BMD	78	NonBrain	medulla_oblongata	Tissue_Fantom60	Brain	0.0543643	0.0641205	0.0141229	1.17946	0.259782	0.488208	6.75e-09	1.25e-08	0.540678	0.294365
BMD	78	NonBrain	melanocytes	SC_HPA81	NonBrain	0.0227456	0.026703	0.00647119	1.17399	0.284503	0.540304	-3.82e-09	1.32e-08	-0.289244	0.613803
BMD	78	NonBrain	mesothelial_cells	SC_HPA81	NonBrain	0.0230784	0.0371793	0.00816818	1.611	0.353932	0.0828977	1.14e-08	1.63e-08	0.697323	0.2428
BMD	78	NonBrain	mge_interneuron	SC_Siletti31	Brain	0.133352	0.127653	0.0114666	0.957259	0.0859871	0.619507	-1.19e-08	4.8e-09	-2.48121	0.993453
BMD	78	NonBrain	microglia	SC_Siletti31	Brain	0.103532	0.183553	0.0203846	1.7729	0.196891	0.00013343	1.73e-08	1.12e-08	1.5436	0.0613423
BMD	78	NonBrain	microglial_cells	SC_HPA81	Brain	0.0849454	0.0991995	0.00965631	1.1678	0.113677	0.136408	-1.45e-09	5.67e-09	-0.255943	0.601002
BMD	78	NonBrain	midbrain_derived_inhibitory	SC_Siletti31	Brain	0.130064	0.143803	0.0115104	1.10563	0.0884977	0.237565	-2.28e-09	4.83e-09	-0.472277	0.681635
BMD	78	NonBrain	miscellaneous	SC_Siletti31	Brain	0.145742	0.129644	0.0131923	0.889544	0.0905178	0.212173	-1.34e-08	4.91e-09	-2.72983	0.996832
BMD	78	NonBrain	monocytes	SC_HPA81	NonBrain	0.0227323	0.0291129	0.00555863	1.28068	0.244526	0.237681	-3.43e-09	1.12e-08	-0.305871	0.620149
BMD	78	NonBrain	mucus_glandular_cells	SC_HPA81	NonBrain	0.0347379	0.0393921	0.00599345	1.13398	0.172534	0.435204	-5.04e-09	8.22e-09	-0.613188	0.730124
BMD	78	NonBrain	muller_glia_cells	SC_HPA81	Brain	0.0299485	0.0316303	0.00773702	1.05615	0.258344	0.827082	-6.66e-09	1.2e-08	-0.553574	0.710065
BMD	78	NonBrain	nk_cells	SC_HPA81	NonBrain	0.0211508	0.039557	0.0102805	1.87024	0.486061	0.0724511	2.46e-08	2.24e-08	1.10112	0.135422
BMD	78	NonBrain	nucleus_accumbens	Tissue_Fantom60	Brain	0.0863423	0.0810272	0.0129142	0.938442	0.14957	0.679782	4.48e-09	8.03e-09	0.558274	0.288329
BMD	78	NonBrain	occipital_cortex	Tissue_Fantom60	Brain	0.0874619	0.0626509	0.00935978	0.716323	0.107016	0.00873655	-1.05e-08	5.61e-09	-1.87599	0.969672
BMD	78	NonBrain	occipital_lobe	Tissue_Fantom60	Brain	0.0744791	0.056949	0.00797788	0.76463	0.107116	0.0279982	-3.55e-09	5.54e-09	-0.64177	0.739489
BMD	78	NonBrain	occipital_pole	Tissue_Fantom60	Brain	0.0640617	0.0487174	0.00829816	0.760477	0.129534	0.0677979	-8.3e-09	6.55e-09	-1.26774	0.897555
BMD	78	NonBrain	olfactory_bulb	Tissue_Fantom60	Brain	0.0810752	0.0581592	0.00860107	0.71735	0.106088	0.00859665	-8.18e-09	5.72e-09	-1.43093	0.923775
BMD	78	NonBrain	oligodendrocyte	SC_Siletti31	Brain	0.110615	0.116055	0.0110913	1.04918	0.100269	0.620348	-1.83e-08	5.74e-09	-3.19111	0.999291
BMD	78	NonBrain	oligodendrocyte_precursor	SC_Siletti31	Brain	0.143097	0.170223	0.0168501	1.18956	0.117753	0.109693	4.34e-10	6.71e-09	0.064752	0.474186
BMD	78	NonBrain	oligodendrocyte_precursor_cells	SC_HPA81	Brain	0.118565	0.119653	0.0147432	1.00917	0.124347	0.941104	2.81e-09	6.74e-09	0.417748	0.338066
BMD	78	NonBrain	oligodendrocytes	SC_HPA81	Brain	0.0828181	0.0913517	0.0109346	1.10304	0.132032	0.436859	-1.72e-10	6.6e-09	-0.0260339	0.510385
BMD	78	NonBrain	oocytes	SC_HPA81	NonBrain	0.0313899	0.0489019	0.00930981	1.55789	0.296586	0.064177	1.8e-08	1.4e-08	1.28314	0.0997214
BMD	78	NonBrain	ovarian_stromal_cells	SC_HPA81	NonBrain	0.0184056	0.032989	0.0101477	1.79233	0.551334	0.150331	2.69e-08	2.54e-08	1.05824	0.144973
BMD	78	NonBrain	ovary	Tissue_Fantom60	NonBrain	0.0325276	0.0622097	0.0217775	1.91252	0.66951	0.175075	3.22e-08	3.13e-08	1.02854	0.151849
BMD	78	NonBrain	pancreas	Tissue_Fantom60	NonBrain	0.0245347	0.0358049	0.00885457	1.45936	0.3609	0.20354	9.55e-09	1.67e-08	0.572778	0.283397
BMD	78	NonBrain	pancreatic_endocrine_cells	SC_HPA81	NonBrain	0.0155013	0.0382163	0.0108789	2.46535	0.701802	0.038482	5.13e-08	3.25e-08	1.58019	0.0570314
BMD	78	NonBrain	paneth_cells	SC_HPA81	NonBrain	0.0161898	0.0143239	0.00383778	0.884751	0.237049	0.629304	-1.36e-08	1.09e-08	-1.2433	0.893122
BMD	78	NonBrain	paracentral_gyrus	Tissue_Fantom60	Brain	0.0819366	0.0684106	0.00972316	0.834921	0.118667	0.165173	-1.98e-09	6.27e-09	-0.315815	0.623929
BMD	78	NonBrain	parietal_lobe	Tissue_Fantom60	Brain	0.0870495	0.0638022	0.00930358	0.732942	0.106877	0.0142691	-8.26e-09	5.75e-09	-1.43663	0.924588
BMD	78	NonBrain	peritubular_cells	SC_HPA81	NonBrain	0.0281217	0.0558997	0.0102853	1.98778	0.365741	0.00739699	3.09e-08	1.71e-08	1.80658	0.035414
BMD	78	NonBrain	pituitary_gland	Tissue_Fantom60	Brain	0.0577956	0.0763437	0.0139686	1.32092	0.241689	0.183863	1.9e-08	1.17e-08	1.62803	0.0517592
BMD	78	NonBrain	placenta	Tissue_Fantom60	NonBrain	0.0290214	0.0372618	0.00856778	1.28394	0.295223	0.334479	2.99e-09	1.38e-08	0.217514	0.413904
BMD	78	NonBrain	plasma_cells	SC_HPA81	NonBrain	0.0165431	0.0232134	0.00871383	1.40321	0.526735	0.441486	1.71e-09	2.44e-08	0.0699124	0.472132
BMD	78	NonBrain	pons	Tissue_Fantom60	Brain	0.0621481	0.085187	0.0151085	1.37071	0.243105	0.12737	2.14e-08	1.19e-08	1.79752	0.0361267
BMD	78	NonBrain	postcentral_gyrus	Tissue_Fantom60	Brain	0.0690916	0.05134	0.0083816	0.743071	0.121311	0.0371342	-9.83e-09	6.24e-09	-1.57525	0.942401
BMD	78	NonBrain	prostate	Tissue_Fantom60	NonBrain	0.0363825	0.0489256	0.0090855	1.34476	0.249721	0.169781	3.47e-09	1.19e-08	0.29275	0.384857
BMD	78	NonBrain	prostatic_glandular_cells	SC_HPA81	NonBrain	0.0289204	0.030583	0.00464804	1.05749	0.160719	0.718864	-5.26e-09	7.55e-09	-0.696769	0.757026
BMD	78	NonBrain	proximal_enterocytes	SC_HPA81	NonBrain	0.0154134	0.0264686	0.00680246	1.71724	0.441333	0.111626	2.48e-08	2.06e-08	1.20251	0.114584
BMD	78	NonBrain	proximal_tubular_cells	SC_HPA81	NonBrain	0.017641	0.024988	0.00579492	1.41647	0.328491	0.20912	1.13e-08	1.51e-08	0.743764	0.22851
BMD	78	NonBrain	putamen	Tissue_Fantom60	Brain	0.0674164	0.0560876	0.00696195	0.831958	0.103268	0.10037	-1.1e-09	4.98e-09	-0.220325	0.587191
BMD	78	NonBrain	retina	Tissue_Fantom60	NonBrain	0.0485119	0.0714694	0.0152542	1.47324	0.314442	0.13355	1.39e-08	1.51e-08	0.917188	0.179522
BMD	78	NonBrain	rod_photoreceptor_cells	SC_HPA81	NonBrain	0.0323409	0.0319719	0.00588511	0.988592	0.181971	0.949871	-1.01e-08	8.39e-09	-1.20263	0.88544
BMD	78	NonBrain	salivary_duct_cells	SC_HPA81	NonBrain	0.0326873	0.0429317	0.00650963	1.31341	0.199149	0.108654	6.72e-10	9.24e-09	0.0727749	0.470993
BMD	78	NonBrain	salivary_gland	Tissue_Fantom60	NonBrain	0.0259443	0.0333397	0.00532444	1.28505	0.205226	0.159602	5.26e-09	9.37e-09	0.561635	0.287182
BMD	78	NonBrain	schwann_cells	SC_HPA81	NonBrain	0.03102	0.0374651	0.00693695	1.20777	0.223628	0.350126	-3.5e-09	1.03e-08	-0.340389	0.633218
BMD	78	NonBrain	secretory_cells	SC_HPA81	NonBrain	0.0188797	0.0655189	0.0273706	3.47033	1.44974	0.0914413	9.8e-08	6.77e-08	1.44695	0.0739556
BMD	78	NonBrain	seminal_vesicle	Tissue_Fantom60	NonBrain	0.0379876	0.0557149	0.00942343	1.46666	0.248066	0.0639677	1.34e-08	1.18e-08	1.13148	0.128927
BMD	78	NonBrain	serous_glandular_cells	SC_HPA81	NonBrain	0.0248953	0.0326118	0.00671837	1.30996	0.269865	0.243291	5.61e-09	1.24e-08	0.453864	0.324963
BMD	78	NonBrain	sertoli_cells	SC_HPA81	NonBrain	0.0221085	0.0307864	0.00778816	1.39252	0.352271	0.260355	7.08e-09	1.61e-08	0.439643	0.330098
BMD	78	NonBrain	skeletal_muscle	Tissue_Fantom60	NonBrain	0.0308145	0.0405225	0.00864186	1.31505	0.280448	0.26271	4.49e-09	1.33e-08	0.338006	0.367679
BMD	78	NonBrain	skeletal_myocytes	SC_HPA81	NonBrain	0.0285471	0.0595572	0.0234949	2.08628	0.823021	0.190264	3.95e-08	3.83e-08	1.02966	0.151586
BMD	78	NonBrain	small_intestine	Tissue_Fantom60	NonBrain	0.0248393	0.0594218	0.0131154	2.39225	0.52801	0.00939662	5.63e-08	2.46e-08	2.28425	0.0111784
BMD	78	NonBrain	smooth_muscle	Tissue_Fantom60	NonBrain	0.0467238	0.0609097	0.00949594	1.30361	0.203236	0.132295	1.74e-09	9.68e-09	0.179903	0.428614
BMD	78	NonBrain	smooth_muscle_cells	SC_HPA81	NonBrain	0.0320528	0.0504243	0.00946001	1.57316	0.295138	0.0528406	1.36e-08	1.39e-08	0.984373	0.162466
BMD	78	NonBrain	spermatocytes	SC_HPA81	NonBrain	0.0195796	0.0223722	0.00554316	1.14263	0.283109	0.61094	3.36e-09	1.29e-08	0.259986	0.397437
BMD	78	NonBrain	spermatogonia	SC_HPA81	NonBrain	0.0181884	0.0227532	0.00588505	1.25097	0.323561	0.437949	6.74e-10	1.49e-08	0.0452687	0.481947
BMD	78	NonBrain	spinal_cord	Tissue_Fantom60	Brain	0.0554796	0.0681681	0.0137339	1.2287	0.247548	0.352176	7.69e-09	1.19e-08	0.648497	0.258332
BMD	78	NonBrain	splatter	SC_Siletti31	Brain	0.121208	0.147704	0.0164975	1.2186	0.136109	0.105463	3.63e-09	6.87e-09	0.52794	0.298771
BMD	78	NonBrain	spleen	Tissue_Fantom60	NonBrain	0.0226386	0.0395248	0.00852697	1.74591	0.376657	0.0537752	2.5e-08	1.78e-08	1.40796	0.0795712
BMD	78	NonBrain	squamous_epithelial_cells	SC_HPA81	NonBrain	0.0154014	0.0201363	0.00454358	1.30744	0.295011	0.289776	1.17e-09	1.34e-08	0.0873938	0.465179
BMD	78	NonBrain	substantia_nigra	Tissue_Fantom60	Brain	0.0493107	0.063278	0.0144458	1.28325	0.292955	0.334198	7.51e-09	1.42e-08	0.527948	0.298768
BMD	78	NonBrain	suprabasal_keratinocytes	SC_HPA81	NonBrain	0.0171738	0.0160731	0.00533288	0.935906	0.310523	0.836666	-1.75e-08	1.45e-08	-1.2081	0.886495
BMD	78	NonBrain	syncytiotrophoblasts	SC_HPA81	NonBrain	0.0201132	0.0289889	0.00784046	1.44129	0.389817	0.253055	3.27e-09	1.79e-08	0.182388	0.427639
BMD	78	NonBrain	t_cells	SC_HPA81	NonBrain	0.0204205	0.0283321	0.0100434	1.38743	0.491827	0.43047	7.25e-10	2.28e-08	0.0318195	0.487308
BMD	78	NonBrain	temporal_cortex	Tissue_Fantom60	Brain	0.0635826	0.0470708	0.00757307	0.74031	0.119106	0.0313035	-1.11e-08	6.07e-09	-1.82738	0.966179
BMD	78	NonBrain	testis	Tissue_Fantom60	NonBrain	0.0235459	0.0309731	0.00673076	1.31543	0.285857	0.263974	9.1e-09	1.32e-08	0.687858	0.245771
BMD	78	NonBrain	thalamic_excitatory	SC_Siletti31	Brain	0.133378	0.139389	0.0125528	1.04507	0.0941143	0.629926	-5.2e-09	5.17e-09	-1.0046	0.842456
BMD	78	NonBrain	thalamus	Tissue_Fantom60	Brain	0.0588518	0.0740401	0.0149762	1.25808	0.254474	0.30972	7.18e-09	1.24e-08	0.576939	0.28199
BMD	78	NonBrain	thymus	Tissue_Fantom60	NonBrain	0.0230509	0.0310312	0.00707065	1.34621	0.306741	0.257087	4.41e-09	1.43e-08	0.309549	0.378452
BMD	78	NonBrain	thyroid_gland	Tissue_Fantom60	NonBrain	0.0323221	0.0378376	0.00555406	1.17064	0.171835	0.321713	-1.59e-10	8.05e-09	-0.0196894	0.507854
BMD	78	NonBrain	tongue	Tissue_Fantom60	NonBrain	0.0223478	0.0169864	0.00549549	0.760092	0.245907	0.334315	-2.03e-08	1.17e-08	-1.73879	0.958964
BMD	78	NonBrain	tonsil	Tissue_Fantom60	NonBrain	0.0178638	0.0208265	0.00962146	1.16585	0.538601	0.756582	-7.03e-09	2.48e-08	-0.282791	0.611332
BMD	78	NonBrain	undifferentiated_cells	SC_HPA81	NonBrain	0.0159826	0.0176974	0.00535926	1.10729	0.335318	0.746871	-3.82e-09	1.52e-08	-0.250884	0.599048
BMD	78	NonBrain	upper_layer_intratelencephalic	SC_Siletti31	Brain	0.12668	0.126491	0.0125891	0.998508	0.0993775	0.98797	-1.02e-08	5.21e-09	-1.9509	0.974466
BMD	78	NonBrain	upper_rhombic_lip	SC_Siletti31	Brain	0.104736	0.146003	0.0140441	1.39402	0.134091	0.00495438	4.12e-09	7.5e-09	0.548717	0.2916
BMD	78	NonBrain	urinary_bladder	Tissue_Fantom60	NonBrain	0.0360071	0.0582764	0.0100616	1.61847	0.279434	0.025458	1.4e-08	1.31e-08	1.07277	0.141688
BMD	78	NonBrain	vagina	Tissue_Fantom60	NonBrain	0.0370658	0.0535554	0.00840736	1.44487	0.226823	0.0502583	8.21e-09	1.06e-08	0.772768	0.21983
BMD	78	NonBrain	vascular	SC_Siletti31	Brain	0.108495	0.172426	0.0136226	1.58925	0.12556	1.89e-06	7.53e-10	6.38e-09	0.118038	0.453019
BMI	21001	NonBrain	adipocytes	SC_HPA81	NonBrain	0.0324001	0.0279335	0.00341051	0.862144	0.105262	0.193182	-1.12e-08	4.17e-09	-2.68785	0.996404
BMI	21001	NonBrain	adipose_tissue	Tissue_Fantom60	NonBrain	0.0370175	0.0314347	0.00400277	0.849185	0.108132	0.167451	-8.57e-09	4.33e-09	-1.97701	0.97598
BMI	21001	NonBrain	alveolar_cells_type_1	SC_HPA81	NonBrain	0.029222	0.0428949	0.0078273	1.4679	0.267856	0.0839422	1.21e-08	1.09e-08	1.11549	0.13232
BMI	21001	NonBrain	alveolar_cells_type_2	SC_HPA81	NonBrain	0.0281096	0.0354184	0.00819359	1.26001	0.291487	0.372478	5.12e-09	1.18e-08	0.433267	0.332411
BMI	21001	NonBrain	amygdala	Tissue_Fantom60	Brain	0.0845482	0.0939315	0.00566492	1.11098	0.0670023	0.0965065	1.89e-09	2.86e-09	0.66239	0.253861
BMI	21001	NonBrain	amygdala_excitatory	SC_Siletti31	Brain	0.152877	0.196007	0.00832448	1.28213	0.0544522	5.64e-07	8.43e-09	2.48e-09	3.39817	0.000339187
BMI	21001	NonBrain	appendix	Tissue_Fantom60	NonBrain	0.0220803	0.0236063	0.00342066	1.06911	0.154919	0.655839	-1.29e-10	6.08e-09	-0.0211524	0.508438
BMI	21001	NonBrain	astrocyte	SC_Siletti31	Brain	0.119646	0.135472	0.00731327	1.13228	0.0611245	0.0314282	-4.56e-09	2.7e-09	-1.68849	0.954342
BMI	21001	NonBrain	astrocytes	SC_HPA81	Brain	0.0932178	0.104907	0.00731236	1.1254	0.0784438	0.110147	1.25e-10	3.34e-09	0.0373938	0.485086
BMI	21001	NonBrain	b_cells	SC_HPA81	NonBrain	0.0223649	0.0267811	0.00330649	1.19746	0.147842	0.184022	3.81e-09	5.89e-09	0.646113	0.259103
BMI	21001	NonBrain	basal_keratinocytes	SC_HPA81	NonBrain	0.0193858	0.0220572	0.00367799	1.1378	0.189726	0.466389	7.68e-10	7.37e-09	0.104207	0.458503
BMI	21001	NonBrain	basal_prostatic_cells	SC_HPA81	NonBrain	0.0245169	0.0371424	0.00807708	1.51497	0.32945	0.12124	1.42e-08	1.33e-08	1.06263	0.143976
BMI	21001	NonBrain	basal_respiratory_cells	SC_HPA81	NonBrain	0.0150588	0.014295	0.00325499	0.949275	0.216152	0.814823	-6.05e-09	8.45e-09	-0.715912	0.762977
BMI	21001	NonBrain	basal_squamous_epithelial_cells	SC_HPA81	NonBrain	0.0193268	0.0229305	0.00395238	1.18646	0.204503	0.361363	1.62e-09	7.93e-09	0.204134	0.419124
BMI	21001	NonBrain	bergmann_glia	SC_Siletti31	Brain	0.116902	0.140652	0.00796987	1.20316	0.0681756	0.00324299	-1.26e-09	2.92e-09	-0.431385	0.666906
BMI	21001	NonBrain	bipolar_cells	SC_HPA81	NonBrain	0.0309354	0.0394895	0.00363668	1.27651	0.117557	0.0202313	5.99e-09	4.59e-09	1.30391	0.0961314
BMI	21001	NonBrain	breast	Tissue_Fantom60	NonBrain	0.0294	0.025007	0.00375244	0.850578	0.127634	0.243351	-1.15e-08	5.11e-09	-2.24496	0.987615
BMI	21001	NonBrain	breast_glandular_cells	SC_HPA81	NonBrain	0.0196947	0.0318649	0.00926295	1.61795	0.470328	0.192373	1.89e-08	1.86e-08	1.01514	0.155021
BMI	21001	NonBrain	breast_myoepithelial_cells	SC_HPA81	NonBrain	0.0160611	0.0155394	0.00244631	0.967515	0.152312	0.830925	-8.69e-09	5.76e-09	-1.50838	0.934272
BMI	21001	NonBrain	cardiomyocytes	SC_HPA81	NonBrain	0.0300831	0.031589	0.00367875	1.05006	0.122286	0.682586	-6.95e-10	4.82e-09	-0.144134	0.557303
BMI	21001	NonBrain	caudate	Tissue_Fantom60	Brain	0.0752949	0.0922712	0.00654397	1.22546	0.0869112	0.0103482	7.88e-09	3.79e-09	2.07962	0.0187803
BMI	21001	NonBrain	cerebellar_inhibitory	SC_Siletti31	Brain	0.115841	0.149211	0.00778589	1.28807	0.067212	3.58e-05	5.31e-09	2.8e-09	1.89522	0.0290316
BMI	21001	NonBrain	cerebellum	Tissue_Fantom60	Brain	0.0657439	0.070457	0.00468357	1.07169	0.0712395	0.313511	-2.23e-10	2.95e-09	-0.0755942	0.530129
BMI	21001	NonBrain	cervix	Tissue_Fantom60	NonBrain	0.0404433	0.0416661	0.00398925	1.03023	0.0986382	0.758961	-4.55e-09	3.92e-09	-1.16279	0.877542
BMI	21001	NonBrain	cge_interneuron	SC_Siletti31	Brain	0.123059	0.167699	0.00983357	1.36276	0.0799096	1.48e-05	9.4e-09	3.78e-09	2.48423	0.00649161
BMI	21001	NonBrain	cholangiocytes	SC_HPA81	NonBrain	0.0226013	0.0241518	0.0039401	1.0686	0.17433	0.694217	-1.28e-09	6.84e-09	-0.187121	0.574217
BMI	21001	NonBrain	choroid_plexus	SC_Siletti31	Brain	0.121924	0.115701	0.00677409	0.948963	0.0555599	0.359121	-1.03e-08	2.39e-09	-4.31704	0.999992
BMI	21001	NonBrain	ciliated_cells	SC_HPA81	NonBrain	0.0300326	0.0239177	0.00357446	0.796393	0.119019	0.0898732	-1.06e-08	4.73e-09	-2.24181	0.987513
BMI	21001	NonBrain	club_cells	SC_HPA81	NonBrain	0.0229831	0.0420393	0.0150569	1.82914	0.65513	0.20812	2.81e-08	2.61e-08	1.07636	0.140883
BMI	21001	NonBrain	collecting_duct_cells	SC_HPA81	NonBrain	0.0219298	0.0251437	0.00356866	1.14656	0.162731	0.368557	1.22e-09	6.34e-09	0.191869	0.423923
BMI	21001	NonBrain	colon	Tissue_Fantom60	NonBrain	0.0261706	0.0368605	0.00780229	1.40847	0.298132	0.173918	1.28e-08	1.2e-08	1.06674	0.143044
BMI	21001	NonBrain	committed_oligodendrocyte_precursor	SC_Siletti31	Brain	0.117432	0.133308	0.00713119	1.13519	0.060726	0.0263156	-3.11e-09	2.48e-09	-1.25713	0.895646
BMI	21001	NonBrain	cone_photoreceptor_cells	SC_HPA81	NonBrain	0.0314326	0.0424578	0.00747954	1.35076	0.237955	0.142901	9.99e-09	9.65e-09	1.03523	0.150281
BMI	21001	NonBrain	corpus_callosum	Tissue_Fantom60	Brain	0.0557341	0.0608246	0.00509715	1.09133	0.0914547	0.318497	-1.41e-09	3.74e-09	-0.376394	0.646688
BMI	21001	NonBrain	cytotrophoblasts	SC_HPA81	NonBrain	0.0174654	0.0140102	0.00340765	0.802172	0.195109	0.311516	-1.35e-08	7.65e-09	-1.7604	0.96083
BMI	21001	NonBrain	deep_layer_corticothalamic_and_6b	SC_Siletti31	Brain	0.141697	0.189668	0.00879889	1.33855	0.0620965	3e-07	1.07e-08	3.12e-09	3.42194	0.00031088
BMI	21001	NonBrain	deep_layer_intratelencephalic	SC_Siletti31	Brain	0.135613	0.186957	0.00861493	1.3786	0.0635257	2.75e-08	1.1e-08	2.9e-09	3.79503	7.38e-05
BMI	21001	NonBrain	deep_layer_near_projecting	SC_Siletti31	Brain	0.131748	0.173767	0.00963458	1.31893	0.0731289	2.87e-05	9.11e-09	3.65e-09	2.49867	0.00623294
BMI	21001	NonBrain	dendritic_cells	SC_HPA81	NonBrain	0.0229642	0.023171	0.00350094	1.00901	0.152452	0.952908	-5.35e-09	5.9e-09	-0.906386	0.817634
BMI	21001	NonBrain	distal_enterocytes	SC_HPA81	NonBrain	0.0181986	0.0347047	0.0172671	1.90699	0.948811	0.340394	3.16e-08	3.75e-08	0.842432	0.199773
BMI	21001	NonBrain	distal_tubular_cells	SC_HPA81	NonBrain	0.0128975	0.00905921	0.00250266	0.702401	0.194042	0.124819	-1.59e-08	7.54e-09	-2.1071	0.982445
BMI	21001	NonBrain	ductal_cells	SC_HPA81	NonBrain	0.0188561	0.0140732	0.0029001	0.746349	0.153802	0.0971389	-1.48e-08	5.9e-09	-2.51533	0.994054
BMI	21001	NonBrain	ductus_deferens	Tissue_Fantom60	NonBrain	0.0337829	0.0436426	0.00666858	1.29186	0.197395	0.1436	6.87e-09	8.04e-09	0.854552	0.1964
BMI	21001	NonBrain	early_spermatids	SC_HPA81	NonBrain	0.0234498	0.0207398	0.00355668	0.884435	0.151672	0.445888	-3.32e-09	5.93e-09	-0.560142	0.712309
BMI	21001	NonBrain	eccentric_medium_spiny_neuron	SC_Siletti31	Brain	0.13994	0.17126	0.00897531	1.2238	0.0641367	0.000552193	3.57e-09	2.86e-09	1.24562	0.106452
BMI	21001	NonBrain	endometrial_stromal_cells	SC_HPA81	NonBrain	0.0307095	0.0241018	0.00349237	0.784834	0.113723	0.0615466	-1.27e-08	4.5e-09	-2.8297	0.99767
BMI	21001	NonBrain	endometrium	Tissue_Fantom60	NonBrain	0.052117	0.061508	0.00656668	1.18019	0.125999	0.15439	2.01e-09	5.42e-09	0.37095	0.355337
BMI	21001	NonBrain	endothelial_cells	SC_HPA81	NonBrain	0.0343071	0.0355432	0.00650905	1.03603	0.189729	0.848814	-2.96e-09	7.68e-09	-0.38471	0.649774
BMI	21001	NonBrain	enteroendocrine_cells	SC_HPA81	NonBrain	0.0198909	0.0269933	0.0073615	1.35706	0.370093	0.336527	1.09e-08	1.47e-08	0.743563	0.22857
BMI	21001	NonBrain	ependymal	SC_Siletti31	Brain	0.112796	0.117253	0.00824996	1.03951	0.0731403	0.588788	-6.57e-09	3.33e-09	-1.9754	0.975889
BMI	21001	NonBrain	epididymis	Tissue_Fantom60	NonBrain	0.035524	0.026053	0.00368321	0.733392	0.103682	0.0105629	-1.33e-08	4.09e-09	-3.25049	0.999424
BMI	21001	NonBrain	erythroid_cells	SC_HPA81	NonBrain	0.0152376	0.0168384	0.00338466	1.10505	0.222125	0.636654	-1.22e-09	8.69e-09	-0.140105	0.555712
BMI	21001	NonBrain	esophagus	Tissue_Fantom60	NonBrain	0.0233245	0.0305427	0.00765147	1.30947	0.328044	0.346123	7.6e-09	1.31e-08	0.581098	0.280587
BMI	21001	NonBrain	excitatory_neurons	SC_HPA81	Brain	0.124029	0.140795	0.00701333	1.13518	0.0565459	0.0163213	3.56e-09	2.53e-09	1.40781	0.0795939
BMI	21001	NonBrain	exocrine_glandular_cells	SC_HPA81	NonBrain	0.0166966	0.0275418	0.00948799	1.64955	0.568259	0.255232	1.83e-08	2.26e-08	0.809422	0.209136
BMI	21001	NonBrain	extravillous_trophoblasts	SC_HPA81	NonBrain	0.0168746	0.0160606	0.00411382	0.951762	0.243788	0.843408	-8.61e-09	9.49e-09	-0.907034	0.817806
BMI	21001	NonBrain	fibroblast	SC_Siletti31	Brain	0.120058	0.11182	0.00653792	0.931385	0.0544563	0.209054	-1.32e-08	2.47e-09	-5.33022	1
BMI	21001	NonBrain	fibroblasts	SC_HPA81	NonBrain	0.0327441	0.0275637	0.00446712	0.84179	0.136425	0.248981	-1.2e-08	5.46e-09	-2.205	0.986273
BMI	21001	NonBrain	frontal_lobe	Tissue_Fantom60	Brain	0.0907069	0.100664	0.00602314	1.10977	0.0664022	0.0973861	2.89e-09	2.86e-09	1.01085	0.156044
BMI	21001	NonBrain	gallbladder	Tissue_Fantom60	NonBrain	0.032846	0.0348259	0.00633382	1.06028	0.192834	0.753968	-3.29e-09	7.85e-09	-0.418505	0.662211
BMI	21001	NonBrain	gastric_mucus_secreting_cells	SC_HPA81	NonBrain	0.0203007	0.0274966	0.00833424	1.35446	0.410539	0.388666	8.24e-09	1.64e-08	0.503292	0.307379
BMI	21001	NonBrain	glandular_and_luminal_cells	SC_HPA81	NonBrain	0.0296382	0.0251256	0.00322673	0.847745	0.108871	0.162418	-1.11e-08	4.28e-09	-2.58555	0.995139
BMI	21001	NonBrain	globus_pallidus	Tissue_Fantom60	Brain	0.0547387	0.0641015	0.00569409	1.17105	0.104023	0.100253	2.74e-09	4.23e-09	0.64798	0.258499
BMI	21001	NonBrain	granulocytes	SC_HPA81	NonBrain	0.0256477	0.024929	0.00307513	0.971978	0.119899	0.815342	-4.56e-09	4.69e-09	-0.972033	0.834483
BMI	21001	NonBrain	granulosa_cells	SC_HPA81	NonBrain	0.0206347	0.0170152	0.00369509	0.824588	0.179071	0.327984	-9.11e-09	7e-09	-1.30038	0.903264
BMI	21001	NonBrain	heart_muscle	Tissue_Fantom60	NonBrain	0.0309227	0.0302414	0.00332038	0.97797	0.107377	0.837685	-4.04e-09	4.23e-09	-0.952864	0.829671
BMI	21001	NonBrain	hepatocytes	SC_HPA81	NonBrain	0.0180025	0.0179383	0.0041199	0.996433	0.228851	0.987564	-4.02e-09	8.96e-09	-0.448494	0.673102
BMI	21001	NonBrain	hippocampal_ca1_3	SC_Siletti31	Brain	0.139935	0.173047	0.00864632	1.23663	0.0617883	0.000197262	6.25e-09	2.78e-09	2.2453	0.0123745
BMI	21001	NonBrain	hippocampal_ca4	SC_Siletti31	Brain	0.138661	0.179183	0.00833059	1.29224	0.0600788	2.04e-06	7.3e-09	2.64e-09	2.76801	0.00282002
BMI	21001	NonBrain	hippocampal_dentate_gyrus	SC_Siletti31	Brain	0.133482	0.160347	0.00769027	1.20126	0.0576126	0.000559965	4.08e-09	2.47e-09	1.64961	0.0495109
BMI	21001	NonBrain	hippocampus	Tissue_Fantom60	Brain	0.0786124	0.0901309	0.00580763	1.14652	0.0738768	0.0462593	3.39e-09	3.07e-09	1.10271	0.135076
BMI	21001	NonBrain	hofbauer_cells	SC_HPA81	NonBrain	0.0165255	0.011968	0.00278688	0.724214	0.168641	0.102544	-1.37e-08	6.59e-09	-2.08553	0.981489
BMI	21001	NonBrain	horizontal_cells	SC_HPA81	NonBrain	0.0305721	0.0412642	0.00396723	1.34974	0.129766	0.00826173	8.63e-09	5.12e-09	1.68645	0.0458549
BMI	21001	NonBrain	inhibitory_neurons	SC_HPA81	Brain	0.130276	0.142675	0.00769819	1.09517	0.0590913	0.106284	6.86e-10	2.72e-09	0.251893	0.400562
BMI	21001	NonBrain	insular_cortex	Tissue_Fantom60	Brain	0.0878593	0.100689	0.0060727	1.14602	0.0691185	0.034374	3.39e-09	2.95e-09	1.14723	0.125643
BMI	21001	NonBrain	intestinal_goblet_cells	SC_HPA81	NonBrain	0.0197096	0.0343203	0.0156583	1.7413	0.794451	0.351786	2.45e-08	3.14e-08	0.779557	0.217826
BMI	21001	NonBrain	ionocytes	SC_HPA81	NonBrain	0.0182453	0.0203366	0.00414162	1.11462	0.226997	0.613584	5.66e-10	8.9e-09	0.0636189	0.474637
BMI	21001	NonBrain	kidney	Tissue_Fantom60	NonBrain	0.0299752	0.0273226	0.00372806	0.911508	0.124371	0.477828	-6.1e-09	4.94e-09	-1.23473	0.891534
BMI	21001	NonBrain	kupffer_cells	SC_HPA81	NonBrain	0.0210478	0.0202827	0.00375819	0.963653	0.178556	0.838526	-3.73e-09	7.02e-09	-0.531096	0.702324
BMI	21001	NonBrain	lamp5_lhx6_and_chandelier	SC_Siletti31	Brain	0.133661	0.162295	0.00835557	1.21423	0.0625132	0.000670732	2.53e-09	2.77e-09	0.9135	0.18049
BMI	21001	NonBrain	langerhans_cells	SC_HPA81	NonBrain	0.0240163	0.0241155	0.00379698	1.00413	0.1581	0.979194	-2.98e-09	6.26e-09	-0.475493	0.682782
BMI	21001	NonBrain	late_spermatids	SC_HPA81	NonBrain	0.0226307	0.0250171	0.00366216	1.10545	0.161823	0.515479	5.98e-10	6.33e-09	0.0944085	0.462392
BMI	21001	NonBrain	leydig_cells	SC_HPA81	NonBrain	0.0264408	0.0229549	0.00343826	0.868163	0.130036	0.312862	-1.06e-08	5.12e-09	-2.06488	0.980533
BMI	21001	NonBrain	liver	Tissue_Fantom60	NonBrain	0.0203158	0.0233649	0.00435389	1.15008	0.21431	0.484465	2.75e-09	8.45e-09	0.325049	0.372572
BMI	21001	NonBrain	locus_coeruleus	Tissue_Fantom60	Brain	0.0599341	0.0604996	0.00479397	1.00944	0.0799874	0.906103	-1.78e-09	3.24e-09	-0.549972	0.708831
BMI	21001	NonBrain	lower_rhombic_lip	SC_Siletti31	Brain	0.12087	0.138528	0.00782491	1.14609	0.0647384	0.0244343	-2.52e-11	2.86e-09	-0.00882146	0.503519
BMI	21001	NonBrain	lung	Tissue_Fantom60	NonBrain	0.0301121	0.0300314	0.00781723	0.99732	0.259604	0.991715	-1.99e-09	1.04e-08	-0.190694	0.575617
BMI	21001	NonBrain	lymph_node	Tissue_Fantom60	NonBrain	0.0189373	0.0190942	0.00291727	1.00829	0.154049	0.957124	-5.59e-10	6.09e-09	-0.0917587	0.536555
BMI	21001	NonBrain	lymphatic_endothelial_cells	SC_HPA81	NonBrain	0.0315142	0.0349531	0.00434751	1.10912	0.137954	0.427935	-1.71e-09	5.41e-09	-0.316464	0.624175
BMI	21001	NonBrain	macrophages	SC_HPA81	NonBrain	0.0224929	0.0194158	0.0029036	0.863193	0.129089	0.291378	-6.94e-09	5.14e-09	-1.35162	0.911752
BMI	21001	NonBrain	mammillary_body	SC_Siletti31	Brain	0.14141	0.163221	0.00893886	1.15424	0.0632122	0.0149951	1.52e-09	2.86e-09	0.529893	0.298093
BMI	21001	NonBrain	medial_frontal_gyrus	Tissue_Fantom60	Brain	0.0906622	0.103421	0.00602173	1.14073	0.0664193	0.0332073	3.52e-09	2.82e-09	1.24796	0.106022
BMI	21001	NonBrain	medial_temporal_gyrus	Tissue_Fantom60	Brain	0.0878218	0.100106	0.00590379	1.13987	0.0672246	0.0368651	3.54e-09	2.84e-09	1.2467	0.106254
BMI	21001	NonBrain	medium_spiny_neuron	SC_Siletti31	Brain	0.131058	0.156023	0.00778144	1.19048	0.0593739	0.00156874	3.33e-09	2.62e-09	1.27186	0.101711
BMI	21001	NonBrain	medulla_oblongata	Tissue_Fantom60	Brain	0.0543643	0.0497341	0.00467256	0.914831	0.0859491	0.324795	-6.54e-09	3.5e-09	-1.8658	0.968965
BMI	21001	NonBrain	melanocytes	SC_HPA81	NonBrain	0.0227456	0.0167618	0.00279021	0.736928	0.12267	0.0345098	-1.4e-08	4.91e-09	-2.84928	0.997809
BMI	21001	NonBrain	mesothelial_cells	SC_HPA81	NonBrain	0.0230784	0.0279905	0.00385607	1.21284	0.167085	0.202057	1.22e-09	6.53e-09	0.186837	0.425894
BMI	21001	NonBrain	mge_interneuron	SC_Siletti31	Brain	0.133352	0.159225	0.00768797	1.19402	0.0576517	0.000794065	1.55e-09	2.55e-09	0.610127	0.270889
BMI	21001	NonBrain	microglia	SC_Siletti31	Brain	0.103532	0.0982655	0.00694178	0.949128	0.0670494	0.44769	-9.08e-09	2.97e-09	-3.05734	0.998883
BMI	21001	NonBrain	microglial_cells	SC_HPA81	Brain	0.0849454	0.0880927	0.00659785	1.03705	0.0776717	0.633155	-3.73e-09	3.22e-09	-1.1589	0.876752
BMI	21001	NonBrain	midbrain_derived_inhibitory	SC_Siletti31	Brain	0.130064	0.157197	0.00760455	1.20862	0.0584677	0.000393688	2.84e-09	2.6e-09	1.09231	0.137349
BMI	21001	NonBrain	miscellaneous	SC_Siletti31	Brain	0.145742	0.177684	0.00875505	1.21917	0.0600721	0.000357645	5.39e-09	2.8e-09	1.9213	0.027347
BMI	21001	NonBrain	monocytes	SC_HPA81	NonBrain	0.0227323	0.0232775	0.00342102	1.02398	0.150492	0.873451	-2.1e-09	5.98e-09	-0.350627	0.637066
BMI	21001	NonBrain	mucus_glandular_cells	SC_HPA81	NonBrain	0.0347379	0.048663	0.0130685	1.40086	0.376203	0.288363	1.06e-08	1.52e-08	0.698343	0.242481
BMI	21001	NonBrain	muller_glia_cells	SC_HPA81	Brain	0.0299485	0.0361951	0.00381358	1.20858	0.127338	0.102506	3.79e-09	4.96e-09	0.764916	0.222161
BMI	21001	NonBrain	nk_cells	SC_HPA81	NonBrain	0.0211508	0.0225195	0.00338908	1.06471	0.160234	0.686548	-1.44e-09	6.28e-09	-0.22986	0.5909
BMI	21001	NonBrain	nucleus_accumbens	Tissue_Fantom60	Brain	0.0863423	0.108449	0.00729817	1.25603	0.084526	0.0029654	9e-09	3.83e-09	2.3523	0.0093289
BMI	21001	NonBrain	occipital_cortex	Tissue_Fantom60	Brain	0.0874619	0.105133	0.0062173	1.20204	0.0710859	0.00466313	5.46e-09	3e-09	1.81837	0.0345035
BMI	21001	NonBrain	occipital_lobe	Tissue_Fantom60	Brain	0.0744791	0.0881254	0.00566488	1.18322	0.07606	0.0161748	5.56e-09	3.14e-09	1.76841	0.0384961
BMI	21001	NonBrain	occipital_pole	Tissue_Fantom60	Brain	0.0640617	0.083635	0.00529589	1.30554	0.0826686	0.000262006	9.22e-09	3.37e-09	2.73292	0.00313881
BMI	21001	NonBrain	olfactory_bulb	Tissue_Fantom60	Brain	0.0810752	0.0938201	0.00568366	1.1572	0.0701036	0.0243511	3.78e-09	2.94e-09	1.28487	0.0994197
BMI	21001	NonBrain	oligodendrocyte	SC_Siletti31	Brain	0.110615	0.118556	0.00652344	1.07179	0.0589744	0.22224	-5.44e-09	2.67e-09	-2.03734	0.979192
BMI	21001	NonBrain	oligodendrocyte_precursor	SC_Siletti31	Brain	0.143097	0.160347	0.00800041	1.12055	0.0559091	0.0310547	-8.65e-11	2.53e-09	-0.0341791	0.513633
BMI	21001	NonBrain	oligodendrocyte_precursor_cells	SC_HPA81	Brain	0.118565	0.132295	0.00749175	1.1158	0.0631867	0.0664344	1.35e-09	2.77e-09	0.487952	0.312792
BMI	21001	NonBrain	oligodendrocytes	SC_HPA81	Brain	0.0828181	0.0820013	0.00632617	0.990137	0.0763863	0.897361	-5.57e-09	3.22e-09	-1.73168	0.958335
BMI	21001	NonBrain	oocytes	SC_HPA81	NonBrain	0.0313899	0.03904	0.00500284	1.24371	0.159378	0.127252	4.56e-09	6.25e-09	0.730339	0.232592
BMI	21001	NonBrain	ovarian_stromal_cells	SC_HPA81	NonBrain	0.0184056	0.0142189	0.00285646	0.772529	0.155195	0.144759	-1.29e-08	6.03e-09	-2.1466	0.984087
BMI	21001	NonBrain	ovary	Tissue_Fantom60	NonBrain	0.0325276	0.0265115	0.0035054	0.815048	0.107767	0.0896714	-1.2e-08	4.26e-09	-2.82514	0.997637
BMI	21001	NonBrain	pancreas	Tissue_Fantom60	NonBrain	0.0245347	0.0327353	0.00762222	1.33425	0.310671	0.284755	7.26e-09	1.26e-08	0.576155	0.282255
BMI	21001	NonBrain	pancreatic_endocrine_cells	SC_HPA81	NonBrain	0.0155013	0.0127998	0.00309078	0.825724	0.199388	0.383853	-1.27e-08	7.76e-09	-1.63167	0.948625
BMI	21001	NonBrain	paneth_cells	SC_HPA81	NonBrain	0.0161898	0.0324548	0.0171865	2.00464	1.06156	0.345452	3.59e-08	4.17e-08	0.861234	0.194555
BMI	21001	NonBrain	paracentral_gyrus	Tissue_Fantom60	Brain	0.0819366	0.0956382	0.00553235	1.16722	0.0675199	0.0134109	4.79e-09	2.82e-09	1.69713	0.0448363
BMI	21001	NonBrain	parietal_lobe	Tissue_Fantom60	Brain	0.0870495	0.102704	0.00589083	1.17983	0.0676722	0.00781491	4.8e-09	2.84e-09	1.69049	0.0454674
BMI	21001	NonBrain	peritubular_cells	SC_HPA81	NonBrain	0.0281217	0.0301947	0.00433697	1.07371	0.154221	0.632695	-2.8e-09	6.05e-09	-0.463052	0.678336
BMI	21001	NonBrain	pituitary_gland	Tissue_Fantom60	Brain	0.0577956	0.0500623	0.00465643	0.866196	0.0805672	0.0987484	-5.74e-09	3.28e-09	-1.74798	0.959766
BMI	21001	NonBrain	placenta	Tissue_Fantom60	NonBrain	0.0290214	0.0262293	0.00347274	0.903793	0.119661	0.422467	-7.34e-09	4.71e-09	-1.55651	0.940207
BMI	21001	NonBrain	plasma_cells	SC_HPA81	NonBrain	0.0165431	0.0205369	0.00359098	1.24142	0.217068	0.267188	4.62e-09	8.59e-09	0.538372	0.29516
BMI	21001	NonBrain	pons	Tissue_Fantom60	Brain	0.0621481	0.0629875	0.00465738	1.01351	0.0749399	0.857023	-1.87e-09	3.1e-09	-0.602513	0.726584
BMI	21001	NonBrain	postcentral_gyrus	Tissue_Fantom60	Brain	0.0690916	0.0889525	0.00520655	1.28746	0.0753572	0.000156835	8.62e-09	3.05e-09	2.82651	0.00235291
BMI	21001	NonBrain	prostate	Tissue_Fantom60	NonBrain	0.0363825	0.0402141	0.00684255	1.10531	0.188073	0.575295	-1.46e-09	7.72e-09	-0.189742	0.575244
BMI	21001	NonBrain	prostatic_glandular_cells	SC_HPA81	NonBrain	0.0289204	0.0438748	0.0127043	1.51709	0.439287	0.241175	1.8e-08	1.77e-08	1.0199	0.153889
BMI	21001	NonBrain	proximal_enterocytes	SC_HPA81	NonBrain	0.0154134	0.0143784	0.00372656	0.932846	0.241773	0.780785	-5.26e-09	9.29e-09	-0.566036	0.714315
BMI	21001	NonBrain	proximal_tubular_cells	SC_HPA81	NonBrain	0.017641	0.0170781	0.0030648	0.968089	0.173731	0.854387	-5.09e-09	6.91e-09	-0.736191	0.769193
BMI	21001	NonBrain	putamen	Tissue_Fantom60	Brain	0.0674164	0.0843324	0.00692065	1.25092	0.102655	0.0157434	9.31e-09	4.44e-09	2.09823	0.0179424
BMI	21001	NonBrain	retina	Tissue_Fantom60	NonBrain	0.0485119	0.0514641	0.00394174	1.06086	0.0812531	0.454503	-2.78e-09	3.28e-09	-0.846397	0.801334
BMI	21001	NonBrain	rod_photoreceptor_cells	SC_HPA81	NonBrain	0.0323409	0.0363416	0.00314426	1.12371	0.0972225	0.203158	-7.66e-10	3.74e-09	-0.204522	0.581027
BMI	21001	NonBrain	salivary_duct_cells	SC_HPA81	NonBrain	0.0326873	0.0407697	0.00796558	1.24726	0.243691	0.311436	4.29e-09	9.88e-09	0.434014	0.332139
BMI	21001	NonBrain	salivary_gland	Tissue_Fantom60	NonBrain	0.0259443	0.0277645	0.00650442	1.07016	0.250707	0.778912	-2.49e-09	1e-08	-0.248716	0.59821
BMI	21001	NonBrain	schwann_cells	SC_HPA81	NonBrain	0.03102	0.032377	0.00452686	1.04375	0.145934	0.764441	-3.35e-09	5.74e-09	-0.584432	0.720535
BMI	21001	NonBrain	secretory_cells	SC_HPA81	NonBrain	0.0188797	0.014549	0.00304827	0.770617	0.161458	0.155129	-1.65e-08	6.24e-09	-2.64278	0.995889
BMI	21001	NonBrain	seminal_vesicle	Tissue_Fantom60	NonBrain	0.0379876	0.057576	0.0121153	1.51565	0.318927	0.109449	1.57e-08	1.3e-08	1.20317	0.114455
BMI	21001	NonBrain	serous_glandular_cells	SC_HPA81	NonBrain	0.0248953	0.0342405	0.00709049	1.37538	0.284812	0.189982	1.13e-08	1.13e-08	0.996896	0.159407
BMI	21001	NonBrain	sertoli_cells	SC_HPA81	NonBrain	0.0221085	0.0173962	0.00266122	0.786857	0.120371	0.0796438	-1.18e-08	4.66e-09	-2.54297	0.994504
BMI	21001	NonBrain	skeletal_muscle	Tissue_Fantom60	NonBrain	0.0308145	0.0380242	0.00775394	1.23397	0.251633	0.353252	3.55e-09	1.03e-08	0.345847	0.364729
BMI	21001	NonBrain	skeletal_myocytes	SC_HPA81	NonBrain	0.0285471	0.0289526	0.00369384	1.0142	0.129394	0.91264	-3.58e-09	5.08e-09	-0.704567	0.75946
BMI	21001	NonBrain	small_intestine	Tissue_Fantom60	NonBrain	0.0248393	0.0308985	0.00810749	1.24393	0.326398	0.455684	6.88e-09	1.31e-08	0.52512	0.29975
BMI	21001	NonBrain	smooth_muscle	Tissue_Fantom60	NonBrain	0.0467238	0.0604803	0.0067658	1.29442	0.144804	0.0447323	5.71e-09	6.11e-09	0.934408	0.175047
BMI	21001	NonBrain	smooth_muscle_cells	SC_HPA81	NonBrain	0.0320528	0.0297806	0.00332106	0.929109	0.103612	0.494673	-7.11e-09	4.08e-09	-1.74211	0.959256
BMI	21001	NonBrain	spermatocytes	SC_HPA81	NonBrain	0.0195796	0.0239798	0.00454067	1.22474	0.231909	0.332395	7.84e-09	8.99e-09	0.872	0.191604
BMI	21001	NonBrain	spermatogonia	SC_HPA81	NonBrain	0.0181884	0.0207833	0.00450875	1.14267	0.247892	0.56538	1.11e-09	9.67e-09	0.115051	0.454202
BMI	21001	NonBrain	spinal_cord	Tissue_Fantom60	Brain	0.0554796	0.0540071	0.00523273	0.973458	0.094318	0.778809	-4.1e-09	3.83e-09	-1.07004	0.8577
BMI	21001	NonBrain	splatter	SC_Siletti31	Brain	0.121208	0.157376	0.0106529	1.2984	0.0878892	0.00102083	7.18e-09	4.2e-09	1.70892	0.0437332
BMI	21001	NonBrain	spleen	Tissue_Fantom60	NonBrain	0.0226386	0.0185275	0.00292197	0.818404	0.129071	0.162366	-7.23e-09	5.19e-09	-1.39263	0.918134
BMI	21001	NonBrain	squamous_epithelial_cells	SC_HPA81	NonBrain	0.0154014	0.0157156	0.00339313	1.0204	0.220314	0.926254	-4.13e-09	8.51e-09	-0.485613	0.686379
BMI	21001	NonBrain	substantia_nigra	Tissue_Fantom60	Brain	0.0493107	0.0494031	0.00379086	1.00187	0.076877	0.980568	-3.99e-09	3.13e-09	-1.27802	0.899378
BMI	21001	NonBrain	suprabasal_keratinocytes	SC_HPA81	NonBrain	0.0171738	0.0196038	0.00347998	1.14149	0.202633	0.48486	-4.27e-10	7.89e-09	-0.0540882	0.521568
BMI	21001	NonBrain	syncytiotrophoblasts	SC_HPA81	NonBrain	0.0201132	0.01814	0.00336663	0.901893	0.167384	0.557671	-1.04e-08	6.47e-09	-1.61082	0.946391
BMI	21001	NonBrain	t_cells	SC_HPA81	NonBrain	0.0204205	0.0234484	0.00338594	1.14827	0.165811	0.371598	7.12e-10	6.56e-09	0.10847	0.456811
BMI	21001	NonBrain	temporal_cortex	Tissue_Fantom60	Brain	0.0635826	0.0852968	0.005321	1.34151	0.0836864	5.62e-05	1.07e-08	3.44e-09	3.11889	0.000907682
BMI	21001	NonBrain	testis	Tissue_Fantom60	NonBrain	0.0235459	0.0278016	0.00406071	1.18074	0.172459	0.296702	3.86e-09	6.65e-09	0.580361	0.280836
BMI	21001	NonBrain	thalamic_excitatory	SC_Siletti31	Brain	0.133378	0.167771	0.00890749	1.25786	0.0667837	0.000199483	6.15e-09	3.35e-09	1.83585	0.03319
BMI	21001	NonBrain	thalamus	Tissue_Fantom60	Brain	0.0588518	0.0666387	0.00512204	1.13231	0.0870328	0.127533	1.33e-09	3.58e-09	0.370421	0.355534
BMI	21001	NonBrain	thymus	Tissue_Fantom60	NonBrain	0.0230509	0.0262082	0.00376637	1.13697	0.163394	0.40259	2.08e-09	6.39e-09	0.325958	0.372228
BMI	21001	NonBrain	thyroid_gland	Tissue_Fantom60	NonBrain	0.0323221	0.0272587	0.0040486	0.843347	0.125258	0.213134	-1.14e-08	4.95e-09	-2.30393	0.989387
BMI	21001	NonBrain	tongue	Tissue_Fantom60	NonBrain	0.0223478	0.023387	0.00317256	1.0465	0.141963	0.743358	-2.21e-09	5.57e-09	-0.396214	0.654026
BMI	21001	NonBrain	tonsil	Tissue_Fantom60	NonBrain	0.0178638	0.0232231	0.00306111	1.30001	0.171358	0.0816439	8.26e-09	6.85e-09	1.20574	0.113959
BMI	21001	NonBrain	undifferentiated_cells	SC_HPA81	NonBrain	0.0159826	0.0212745	0.00845026	1.3311	0.528715	0.531046	9.16e-09	2.09e-08	0.438554	0.330492
BMI	21001	NonBrain	upper_layer_intratelencephalic	SC_Siletti31	Brain	0.12668	0.167367	0.00875149	1.32118	0.0690836	8.44e-06	8.15e-09	3.07e-09	2.65808	0.00392939
BMI	21001	NonBrain	upper_rhombic_lip	SC_Siletti31	Brain	0.104736	0.130481	0.00729352	1.24581	0.0696375	0.000577598	1.82e-09	2.69e-09	0.679643	0.248365
BMI	21001	NonBrain	urinary_bladder	Tissue_Fantom60	NonBrain	0.0360071	0.0413989	0.00665249	1.14974	0.184755	0.417793	1.8e-10	7.59e-09	0.0237593	0.490522
BMI	21001	NonBrain	vagina	Tissue_Fantom60	NonBrain	0.0370658	0.0388315	0.00412019	1.04764	0.111159	0.668221	-4.16e-09	4.4e-09	-0.944526	0.827549
BMI	21001	NonBrain	vascular	SC_Siletti31	Brain	0.108495	0.101647	0.00643466	0.936887	0.0593084	0.287591	-1.28e-08	2.59e-09	-4.92366	1
Calcium	30680	NonBrain	adipocytes	SC_HPA81	NonBrain	0.0324001	0.0396536	0.00622669	1.22387	0.192181	0.241707	-2.92e-09	3.82e-09	-0.764322	0.777662
Calcium	30680	NonBrain	adipose_tissue	Tissue_Fantom60	NonBrain	0.0370175	0.0432693	0.00635871	1.16889	0.171776	0.326519	-1.79e-09	3.46e-09	-0.517872	0.697726
Calcium	30680	NonBrain	alveolar_cells_type_1	SC_HPA81	NonBrain	0.029222	0.0566877	0.00985538	1.9399	0.337259	0.00693204	8.8e-09	6.94e-09	1.26793	0.102412
Calcium	30680	NonBrain	alveolar_cells_type_2	SC_HPA81	NonBrain	0.0281096	0.0352924	0.00723501	1.25553	0.257385	0.319185	-5.05e-09	5.02e-09	-1.00667	0.842953
Calcium	30680	NonBrain	amygdala	Tissue_Fantom60	Brain	0.0845482	0.0560665	0.00785429	0.663131	0.0928972	0.000365709	-3.44e-09	2.17e-09	-1.58458	0.943469
Calcium	30680	NonBrain	amygdala_excitatory	SC_Siletti31	Brain	0.152877	0.18892	0.0137606	1.23577	0.090011	0.00818443	-1.21e-10	2.26e-09	-0.0537635	0.521438
Calcium	30680	NonBrain	appendix	Tissue_Fantom60	NonBrain	0.0220803	0.0468198	0.0127594	2.12043	0.577865	0.0582841	9.85e-09	1.14e-08	0.865925	0.193266
Calcium	30680	NonBrain	astrocyte	SC_Siletti31	Brain	0.119646	0.197614	0.0162426	1.65167	0.135756	2.22e-06	-4.83e-10	3.35e-09	-0.144139	0.557305
Calcium	30680	NonBrain	astrocytes	SC_HPA81	Brain	0.0932178	0.074542	0.00980081	0.799654	0.105139	0.060888	-3.95e-09	2.4e-09	-1.64525	0.950041
Calcium	30680	NonBrain	b_cells	SC_HPA81	NonBrain	0.0223649	0.0352859	0.00915083	1.57773	0.409159	0.159883	-5.43e-10	7.79e-09	-0.069785	0.527818
Calcium	30680	NonBrain	basal_keratinocytes	SC_HPA81	NonBrain	0.0193858	0.0234799	0.00510111	1.21119	0.263136	0.414201	-3.79e-09	5.3e-09	-0.715727	0.76292
Calcium	30680	NonBrain	basal_prostatic_cells	SC_HPA81	NonBrain	0.0245169	0.0653535	0.0159671	2.66566	0.651269	0.0133938	2.52e-08	1.34e-08	1.88238	0.0298921
Calcium	30680	NonBrain	basal_respiratory_cells	SC_HPA81	NonBrain	0.0150588	0.0345879	0.0149749	2.29685	0.994429	0.19452	1.63e-08	1.98e-08	0.826507	0.204258
Calcium	30680	NonBrain	basal_squamous_epithelial_cells	SC_HPA81	NonBrain	0.0193268	0.0298711	0.00555529	1.54558	0.28744	0.0531202	2.25e-09	5.65e-09	0.398506	0.345129
Calcium	30680	NonBrain	bergmann_glia	SC_Siletti31	Brain	0.116902	0.181868	0.0158384	1.55573	0.135485	5.12e-05	-1.03e-09	3.17e-09	-0.324071	0.627058
Calcium	30680	NonBrain	bipolar_cells	SC_HPA81	NonBrain	0.0309354	0.0308181	0.00513604	0.996206	0.166025	0.981744	-6.37e-09	3.33e-09	-1.91198	0.97206
Calcium	30680	NonBrain	breast	Tissue_Fantom60	NonBrain	0.0294	0.0393631	0.00696644	1.33888	0.236954	0.146267	-5.27e-11	4.71e-09	-0.0111957	0.504466
Calcium	30680	NonBrain	breast_glandular_cells	SC_HPA81	NonBrain	0.0196947	0.0328313	0.00703247	1.66701	0.357075	0.0578778	3.58e-09	7.03e-09	0.509362	0.305249
Calcium	30680	NonBrain	breast_myoepithelial_cells	SC_HPA81	NonBrain	0.0160611	0.0297607	0.00719402	1.85296	0.447915	0.0554028	6.27e-09	8.56e-09	0.732522	0.231925
Calcium	30680	NonBrain	cardiomyocytes	SC_HPA81	NonBrain	0.0300831	0.0235424	0.00527243	0.782581	0.175262	0.209957	-7.86e-09	3.39e-09	-2.32226	0.989891
Calcium	30680	NonBrain	caudate	Tissue_Fantom60	Brain	0.0752949	0.051197	0.00637665	0.679953	0.084689	0.00014051	-3.23e-09	1.75e-09	-1.84185	0.967251
Calcium	30680	NonBrain	cerebellar_inhibitory	SC_Siletti31	Brain	0.115841	0.218377	0.0184307	1.88515	0.159104	3.17e-07	9.1e-09	3.66e-09	2.48431	0.00649021
Calcium	30680	NonBrain	cerebellum	Tissue_Fantom60	Brain	0.0657439	0.0618541	0.0097592	0.940833	0.148443	0.689814	-5.2e-10	3.16e-09	-0.164705	0.565412
Calcium	30680	NonBrain	cervix	Tissue_Fantom60	NonBrain	0.0404433	0.0465814	0.00675632	1.15177	0.167057	0.357661	-5.91e-10	3.38e-09	-0.175069	0.569487
Calcium	30680	NonBrain	cge_interneuron	SC_Siletti31	Brain	0.123059	0.167422	0.017394	1.3605	0.141347	0.0103417	-1.74e-09	3.23e-09	-0.53716	0.704421
Calcium	30680	NonBrain	cholangiocytes	SC_HPA81	NonBrain	0.0226013	0.0347154	0.00813231	1.53599	0.359816	0.137441	3.14e-09	7.23e-09	0.433985	0.33215
Calcium	30680	NonBrain	choroid_plexus	SC_Siletti31	Brain	0.121924	0.233582	0.0183554	1.91579	0.150548	3.7e-09	7.43e-09	3.29e-09	2.25721	0.0119976
Calcium	30680	NonBrain	ciliated_cells	SC_HPA81	NonBrain	0.0300326	0.0597224	0.01301	1.98859	0.433195	0.027009	1.31e-08	8.71e-09	1.50752	0.0658391
Calcium	30680	NonBrain	club_cells	SC_HPA81	NonBrain	0.0229831	0.0467125	0.0114927	2.03247	0.500051	0.0433821	1.26e-08	1.01e-08	1.24799	0.106018
Calcium	30680	NonBrain	collecting_duct_cells	SC_HPA81	NonBrain	0.0219298	0.0426137	0.00793076	1.94319	0.361643	0.0118145	1.1e-08	7.34e-09	1.49252	0.0677813
Calcium	30680	NonBrain	colon	Tissue_Fantom60	NonBrain	0.0261706	0.0441641	0.00888571	1.68755	0.33953	0.0461409	7.41e-09	6.81e-09	1.08792	0.138314
Calcium	30680	NonBrain	committed_oligodendrocyte_precursor	SC_Siletti31	Brain	0.117432	0.212554	0.0187837	1.81002	0.159953	6.98e-07	9.13e-10	3.47e-09	0.26299	0.396279
Calcium	30680	NonBrain	cone_photoreceptor_cells	SC_HPA81	NonBrain	0.0314326	0.0261809	0.00456581	0.832919	0.145257	0.251259	-9.09e-09	2.98e-09	-3.05357	0.998869
Calcium	30680	NonBrain	corpus_callosum	Tissue_Fantom60	Brain	0.0557341	0.0454036	0.00771137	0.814646	0.13836	0.186802	-7.75e-09	3e-09	-2.58598	0.995145
Calcium	30680	NonBrain	cytotrophoblasts	SC_HPA81	NonBrain	0.0174654	0.0255681	0.00702308	1.46393	0.402114	0.251985	-1.55e-09	7.76e-09	-0.199492	0.579061
Calcium	30680	NonBrain	deep_layer_corticothalamic_and_6b	SC_Siletti31	Brain	0.141697	0.177087	0.0170562	1.24976	0.120371	0.0388823	-8.71e-10	2.86e-09	-0.304519	0.619634
Calcium	30680	NonBrain	deep_layer_intratelencephalic	SC_Siletti31	Brain	0.135613	0.181634	0.0137232	1.33936	0.101194	0.000922239	-5.65e-10	2.34e-09	-0.24158	0.595447
Calcium	30680	NonBrain	deep_layer_near_projecting	SC_Siletti31	Brain	0.131748	0.154512	0.0118581	1.17278	0.0900056	0.0532847	-3.89e-09	2.21e-09	-1.76257	0.961014
Calcium	30680	NonBrain	dendritic_cells	SC_HPA81	NonBrain	0.0229642	0.0220981	0.00582671	0.962286	0.253731	0.881676	-1.39e-08	5.36e-09	-2.59443	0.995263
Calcium	30680	NonBrain	distal_enterocytes	SC_HPA81	NonBrain	0.0181986	0.036968	0.00777172	2.03136	0.427049	0.0176433	1.02e-08	8.55e-09	1.19213	0.116605
Calcium	30680	NonBrain	distal_tubular_cells	SC_HPA81	NonBrain	0.0128975	0.0252496	0.00781512	1.95771	0.605941	0.118384	1.06e-08	1.16e-08	0.917007	0.179569
Calcium	30680	NonBrain	ductal_cells	SC_HPA81	NonBrain	0.0188561	0.0384862	0.00781111	2.04105	0.414249	0.0147742	1.08e-08	8.34e-09	1.29188	0.0981991
Calcium	30680	NonBrain	ductus_deferens	Tissue_Fantom60	NonBrain	0.0337829	0.0634294	0.0137728	1.87756	0.407687	0.0343627	1.21e-08	8.3e-09	1.4578	0.0724476
Calcium	30680	NonBrain	early_spermatids	SC_HPA81	NonBrain	0.0234498	0.0247371	0.00514633	1.0549	0.219461	0.801442	-3.5e-10	4.42e-09	-0.0792947	0.531601
Calcium	30680	NonBrain	eccentric_medium_spiny_neuron	SC_Siletti31	Brain	0.13994	0.160904	0.0150261	1.1498	0.107375	0.15785	-3.95e-09	2.66e-09	-1.4885	0.93169
Calcium	30680	NonBrain	endometrial_stromal_cells	SC_HPA81	NonBrain	0.0307095	0.0329843	0.00708067	1.07408	0.23057	0.74629	-4.25e-09	4.62e-09	-0.920218	0.821271
Calcium	30680	NonBrain	endometrium	Tissue_Fantom60	NonBrain	0.052117	0.0553055	0.00842003	1.06118	0.16156	0.703154	-3.31e-09	3.43e-09	-0.967027	0.833235
Calcium	30680	NonBrain	endothelial_cells	SC_HPA81	NonBrain	0.0343071	0.0434251	0.00660307	1.26578	0.19247	0.164098	-2.17e-09	3.92e-09	-0.553483	0.710034
Calcium	30680	NonBrain	enteroendocrine_cells	SC_HPA81	NonBrain	0.0198909	0.0394871	0.00966333	1.98518	0.485816	0.044233	1.06e-08	9.68e-09	1.0971	0.136299
Calcium	30680	NonBrain	ependymal	SC_Siletti31	Brain	0.112796	0.173462	0.0152464	1.53784	0.135167	8.61e-05	-2.65e-09	3.5e-09	-0.756012	0.775179
Calcium	30680	NonBrain	epididymis	Tissue_Fantom60	NonBrain	0.035524	0.0511896	0.0091485	1.44099	0.25753	0.0913127	4.42e-09	5.17e-09	0.855953	0.196012
Calcium	30680	NonBrain	erythroid_cells	SC_HPA81	NonBrain	0.0152376	0.0392552	0.00906914	2.5762	0.59518	0.00935616	1.85e-08	1.19e-08	1.54655	0.0609857
Calcium	30680	NonBrain	esophagus	Tissue_Fantom60	NonBrain	0.0233245	0.0385327	0.00624496	1.65203	0.267743	0.0174953	5.93e-09	5.47e-09	1.0844	0.139093
Calcium	30680	NonBrain	excitatory_neurons	SC_HPA81	Brain	0.124029	0.0799949	0.00997474	0.644969	0.0804226	2.35e-05	-3.86e-09	2.11e-09	-1.83037	0.966402
Calcium	30680	NonBrain	exocrine_glandular_cells	SC_HPA81	NonBrain	0.0166966	0.0311838	0.00536734	1.86768	0.321464	0.00548734	3.05e-09	6.31e-09	0.483144	0.314497
Calcium	30680	NonBrain	extravillous_trophoblasts	SC_HPA81	NonBrain	0.0168746	0.0328878	0.00715259	1.94896	0.423868	0.0256693	7.83e-09	8.48e-09	0.923494	0.177875
Calcium	30680	NonBrain	fibroblast	SC_Siletti31	Brain	0.120058	0.221456	0.0173953	1.84458	0.144891	9.84e-09	1.53e-09	3.33e-09	0.460366	0.322627
Calcium	30680	NonBrain	fibroblasts	SC_HPA81	NonBrain	0.0327441	0.0358143	0.00553282	1.09376	0.168971	0.575845	-3.23e-09	3.41e-09	-0.948686	0.82861
Calcium	30680	NonBrain	frontal_lobe	Tissue_Fantom60	Brain	0.0907069	0.0549285	0.00728802	0.605561	0.080347	1.65e-06	-4.69e-09	1.84e-09	-2.54989	0.994612
Calcium	30680	NonBrain	gallbladder	Tissue_Fantom60	NonBrain	0.032846	0.0582627	0.00848233	1.77382	0.258246	0.00368614	1.01e-08	5.22e-09	1.92714	0.0269808
Calcium	30680	NonBrain	gastric_mucus_secreting_cells	SC_HPA81	NonBrain	0.0203007	0.0561865	0.0103317	2.76771	0.50893	0.000670662	2.39e-08	1.01e-08	2.37186	0.00884928
Calcium	30680	NonBrain	glandular_and_luminal_cells	SC_HPA81	NonBrain	0.0296382	0.0514868	0.00828824	1.73718	0.279647	0.00855477	6.21e-09	5.59e-09	1.11072	0.133345
Calcium	30680	NonBrain	globus_pallidus	Tissue_Fantom60	Brain	0.0547387	0.0405958	0.00548825	0.741629	0.100263	0.0129184	-7.66e-09	2.19e-09	-3.5011	0.999768
Calcium	30680	NonBrain	granulocytes	SC_HPA81	NonBrain	0.0256477	0.0274297	0.0061982	1.06948	0.241667	0.773075	-7.46e-09	4.95e-09	-1.50617	0.933988
Calcium	30680	NonBrain	granulosa_cells	SC_HPA81	NonBrain	0.0206347	0.0347593	0.00854754	1.6845	0.41423	0.102158	7.72e-09	8.13e-09	0.949781	0.171112
Calcium	30680	NonBrain	heart_muscle	Tissue_Fantom60	NonBrain	0.0309227	0.0315099	0.00526536	1.01899	0.170275	0.911073	-4.62e-09	3.47e-09	-1.33002	0.908244
Calcium	30680	NonBrain	hepatocytes	SC_HPA81	NonBrain	0.0180025	0.0251236	0.00455051	1.39556	0.25277	0.111109	-1.48e-09	5.06e-09	-0.293054	0.615259
Calcium	30680	NonBrain	hippocampal_ca1_3	SC_Siletti31	Brain	0.139935	0.162295	0.0117491	1.15979	0.0839611	0.0568494	-2.74e-09	2.05e-09	-1.33405	0.908906
Calcium	30680	NonBrain	hippocampal_ca4	SC_Siletti31	Brain	0.138661	0.189753	0.0226403	1.36847	0.163278	0.0270263	1.72e-09	3.74e-09	0.461051	0.322381
Calcium	30680	NonBrain	hippocampal_dentate_gyrus	SC_Siletti31	Brain	0.133482	0.168476	0.0124938	1.26216	0.093599	0.00623821	-5.77e-10	2.14e-09	-0.269752	0.606324
Calcium	30680	NonBrain	hippocampus	Tissue_Fantom60	Brain	0.0786124	0.0579415	0.010331	0.737052	0.131416	0.0424468	-1.91e-09	2.72e-09	-0.700736	0.758266
Calcium	30680	NonBrain	hofbauer_cells	SC_HPA81	NonBrain	0.0165255	0.0376452	0.00727733	2.27801	0.44037	0.00512837	1.1e-08	8.51e-09	1.29679	0.0973512
Calcium	30680	NonBrain	horizontal_cells	SC_HPA81	NonBrain	0.0305721	0.0298055	0.00556737	0.974926	0.182106	0.890563	-7.09e-09	3.72e-09	-1.90579	0.971662
Calcium	30680	NonBrain	inhibitory_neurons	SC_HPA81	Brain	0.130276	0.0772498	0.00903022	0.59297	0.069316	2.45e-08	-4.82e-09	1.73e-09	-2.78344	0.997311
Calcium	30680	NonBrain	insular_cortex	Tissue_Fantom60	Brain	0.0878593	0.05427	0.00621731	0.617693	0.0707645	1.46e-07	-4.91e-09	1.61e-09	-3.06148	0.998899
Calcium	30680	NonBrain	intestinal_goblet_cells	SC_HPA81	NonBrain	0.0197096	0.0403146	0.00901012	2.04543	0.457144	0.0237485	1.08e-08	9.3e-09	1.16232	0.122553
Calcium	30680	NonBrain	ionocytes	SC_HPA81	NonBrain	0.0182453	0.037653	0.0153633	2.06371	0.842042	0.207712	1.2e-08	1.67e-08	0.718893	0.236103
Calcium	30680	NonBrain	kidney	Tissue_Fantom60	NonBrain	0.0299752	0.0490055	0.008091	1.63487	0.269923	0.0222093	7.5e-09	5.28e-09	1.41881	0.077977
Calcium	30680	NonBrain	kupffer_cells	SC_HPA81	NonBrain	0.0210478	0.0415024	0.00805193	1.97182	0.382556	0.0132714	8.02e-09	7.47e-09	1.07345	0.141536
Calcium	30680	NonBrain	lamp5_lhx6_and_chandelier	SC_Siletti31	Brain	0.133661	0.180311	0.0164926	1.34902	0.123391	0.00519306	5.05e-10	2.76e-09	0.18271	0.427513
Calcium	30680	NonBrain	langerhans_cells	SC_HPA81	NonBrain	0.0240163	0.0434255	0.0079084	1.80817	0.329293	0.0150831	6.87e-09	6.37e-09	1.07895	0.140305
Calcium	30680	NonBrain	late_spermatids	SC_HPA81	NonBrain	0.0226307	0.0347698	0.00865552	1.5364	0.382469	0.158101	3.75e-09	7.54e-09	0.497899	0.309278
Calcium	30680	NonBrain	leydig_cells	SC_HPA81	NonBrain	0.0264408	0.0313468	0.00535156	1.18555	0.202397	0.353633	-2.29e-09	3.96e-09	-0.577894	0.718332
Calcium	30680	NonBrain	liver	Tissue_Fantom60	NonBrain	0.0203158	0.0285382	0.00474061	1.40473	0.233345	0.0785032	-3.26e-10	4.57e-09	-0.0712082	0.528384
Calcium	30680	NonBrain	locus_coeruleus	Tissue_Fantom60	Brain	0.0599341	0.0415305	0.0064817	0.692936	0.108147	0.00675385	-6.62e-09	2.47e-09	-2.68038	0.996323
Calcium	30680	NonBrain	lower_rhombic_lip	SC_Siletti31	Brain	0.12087	0.175692	0.0149617	1.45356	0.123784	0.000354501	-2.25e-10	2.87e-09	-0.0786861	0.531359
Calcium	30680	NonBrain	lung	Tissue_Fantom60	NonBrain	0.0301121	0.0359014	0.0056992	1.19226	0.189266	0.313807	-2.13e-09	3.77e-09	-0.564456	0.713778
Calcium	30680	NonBrain	lymph_node	Tissue_Fantom60	NonBrain	0.0189373	0.0212064	0.00501978	1.11982	0.265074	0.649962	-7.74e-09	5.1e-09	-1.51591	0.935228
Calcium	30680	NonBrain	lymphatic_endothelial_cells	SC_HPA81	NonBrain	0.0315142	0.0390835	0.00855481	1.24019	0.271459	0.374006	-2.27e-09	5.5e-09	-0.412713	0.660092
Calcium	30680	NonBrain	macrophages	SC_HPA81	NonBrain	0.0224929	0.04565	0.00877936	2.02953	0.390316	0.0108392	1.04e-08	7.74e-09	1.33729	0.0905636
Calcium	30680	NonBrain	mammillary_body	SC_Siletti31	Brain	0.14141	0.168983	0.0153347	1.19499	0.108441	0.0688722	-1.15e-09	2.44e-09	-0.470378	0.680958
Calcium	30680	NonBrain	medial_frontal_gyrus	Tissue_Fantom60	Brain	0.0906622	0.0590918	0.00870754	0.651779	0.0960438	0.000392649	-4.17e-09	2.25e-09	-1.85258	0.968029
Calcium	30680	NonBrain	medial_temporal_gyrus	Tissue_Fantom60	Brain	0.0878218	0.0564739	0.00707261	0.643051	0.0805336	1.43e-05	-3.69e-09	1.82e-09	-2.03081	0.978863
Calcium	30680	NonBrain	medium_spiny_neuron	SC_Siletti31	Brain	0.131058	0.185375	0.0178711	1.41444	0.13636	0.00290318	1.05e-09	3.29e-09	0.320154	0.374426
Calcium	30680	NonBrain	medulla_oblongata	Tissue_Fantom60	Brain	0.0543643	0.0423976	0.00616498	0.77988	0.113401	0.0553664	-5.99e-09	2.42e-09	-2.47464	0.993332
Calcium	30680	NonBrain	melanocytes	SC_HPA81	NonBrain	0.0227456	0.0257314	0.00497573	1.13127	0.218756	0.545854	-5.72e-09	4.39e-09	-1.30254	0.903635
Calcium	30680	NonBrain	mesothelial_cells	SC_HPA81	NonBrain	0.0230784	0.037308	0.00789498	1.61658	0.342094	0.0685319	3.17e-09	6.73e-09	0.471005	0.318819
Calcium	30680	NonBrain	mge_interneuron	SC_Siletti31	Brain	0.133352	0.172304	0.0146758	1.2921	0.110053	0.00949444	-9.98e-10	2.69e-09	-0.371328	0.644803
Calcium	30680	NonBrain	microglia	SC_Siletti31	Brain	0.103532	0.24253	0.0363474	2.34255	0.351073	0.000344013	9.46e-09	8.34e-09	1.13544	0.128095
Calcium	30680	NonBrain	microglial_cells	SC_HPA81	Brain	0.0849454	0.0764073	0.00991654	0.899488	0.11674	0.386459	-4.77e-09	2.47e-09	-1.93141	0.973284
Calcium	30680	NonBrain	midbrain_derived_inhibitory	SC_Siletti31	Brain	0.130064	0.190736	0.0199841	1.46648	0.153648	0.00422043	3.98e-09	3.48e-09	1.14456	0.126196
Calcium	30680	NonBrain	miscellaneous	SC_Siletti31	Brain	0.145742	0.196868	0.013433	1.35079	0.0921696	0.000212433	5.5e-10	2.14e-09	0.256692	0.398708
Calcium	30680	NonBrain	monocytes	SC_HPA81	NonBrain	0.0227323	0.0351836	0.00902451	1.54773	0.39699	0.170334	-1.7e-09	7.63e-09	-0.222558	0.58806
Calcium	30680	NonBrain	mucus_glandular_cells	SC_HPA81	NonBrain	0.0347379	0.0605077	0.00960832	1.74184	0.276595	0.00869905	8.85e-09	5.62e-09	1.57518	0.0576075
Calcium	30680	NonBrain	muller_glia_cells	SC_HPA81	Brain	0.0299485	0.0455124	0.00820267	1.51969	0.273892	0.0628707	5.09e-09	5.57e-09	0.913609	0.180461
Calcium	30680	NonBrain	nk_cells	SC_HPA81	NonBrain	0.0211508	0.0396368	0.00835918	1.87402	0.395219	0.0283073	5.61e-09	7.81e-09	0.717636	0.236491
Calcium	30680	NonBrain	nucleus_accumbens	Tissue_Fantom60	Brain	0.0863423	0.0539202	0.00601857	0.624494	0.0697059	2.12e-07	-4.8e-09	1.54e-09	-3.11064	0.999067
Calcium	30680	NonBrain	occipital_cortex	Tissue_Fantom60	Brain	0.0874619	0.0646453	0.00911528	0.739126	0.10422	0.0126942	-3.21e-09	2.37e-09	-1.35424	0.912169
Calcium	30680	NonBrain	occipital_lobe	Tissue_Fantom60	Brain	0.0744791	0.0462556	0.00668097	0.621055	0.0897026	2.66e-05	-4.56e-09	1.92e-09	-2.37789	0.991294
Calcium	30680	NonBrain	occipital_pole	Tissue_Fantom60	Brain	0.0640617	0.0407117	0.0063481	0.635507	0.0990935	0.000428355	-7.67e-09	2.41e-09	-3.177	0.999256
Calcium	30680	NonBrain	olfactory_bulb	Tissue_Fantom60	Brain	0.0810752	0.0534777	0.00915431	0.659607	0.112911	0.00176213	-3.74e-09	2.2e-09	-1.70078	0.955508
Calcium	30680	NonBrain	oligodendrocyte	SC_Siletti31	Brain	0.110615	0.187189	0.0168884	1.69226	0.152677	8.14e-06	3.43e-10	3.51e-09	0.0978276	0.461035
Calcium	30680	NonBrain	oligodendrocyte_precursor	SC_Siletti31	Brain	0.143097	0.168076	0.0147774	1.17456	0.103268	0.0911413	-2.57e-09	2.49e-09	-1.03348	0.849309
Calcium	30680	NonBrain	oligodendrocyte_precursor_cells	SC_HPA81	Brain	0.118565	0.0750654	0.00997209	0.633114	0.0841063	2.56e-05	-5.11e-09	2.11e-09	-2.41968	0.992233
Calcium	30680	NonBrain	oligodendrocytes	SC_HPA81	Brain	0.0828181	0.0601307	0.00831451	0.726057	0.100395	0.00932983	-6.56e-09	2.44e-09	-2.68366	0.996359
Calcium	30680	NonBrain	oocytes	SC_HPA81	NonBrain	0.0313899	0.038961	0.00575782	1.2412	0.183429	0.18764	-1.38e-09	3.72e-09	-0.370864	0.644631
Calcium	30680	NonBrain	ovarian_stromal_cells	SC_HPA81	NonBrain	0.0184056	0.0201977	0.00470917	1.09736	0.255855	0.701566	-4.88e-09	5.14e-09	-0.948578	0.828582
Calcium	30680	NonBrain	ovary	Tissue_Fantom60	NonBrain	0.0325276	0.0425253	0.00612137	1.30736	0.18819	0.0944896	2.18e-09	3.75e-09	0.581462	0.280464
Calcium	30680	NonBrain	pancreas	Tissue_Fantom60	NonBrain	0.0245347	0.0366892	0.00768562	1.4954	0.313256	0.11636	1.17e-09	6.04e-09	0.19419	0.423014
Calcium	30680	NonBrain	pancreatic_endocrine_cells	SC_HPA81	NonBrain	0.0155013	0.0331859	0.00968248	2.14084	0.624622	0.0712471	1.01e-08	1.24e-08	0.815738	0.207325
Calcium	30680	NonBrain	paneth_cells	SC_HPA81	NonBrain	0.0161898	0.0280933	0.00654778	1.73525	0.404438	0.0734307	5.11e-09	7.97e-09	0.64139	0.260635
Calcium	30680	NonBrain	paracentral_gyrus	Tissue_Fantom60	Brain	0.0819366	0.0496286	0.00724454	0.605695	0.0884165	8.46e-06	-5.68e-09	1.96e-09	-2.90324	0.998153
Calcium	30680	NonBrain	parietal_lobe	Tissue_Fantom60	Brain	0.0870495	0.0617961	0.00906764	0.709895	0.104166	0.00626279	-3.21e-09	2.43e-09	-1.32118	0.906779
Calcium	30680	NonBrain	peritubular_cells	SC_HPA81	NonBrain	0.0281217	0.0401551	0.00792904	1.4279	0.281954	0.120314	1.43e-09	5.49e-09	0.260973	0.397057
Calcium	30680	NonBrain	pituitary_gland	Tissue_Fantom60	Brain	0.0577956	0.059047	0.00795456	1.02165	0.137632	0.874829	1.8e-09	2.84e-09	0.63563	0.262509
Calcium	30680	NonBrain	placenta	Tissue_Fantom60	NonBrain	0.0290214	0.0439288	0.0067711	1.51367	0.233314	0.0248503	3e-09	4.58e-09	0.655764	0.255988
Calcium	30680	NonBrain	plasma_cells	SC_HPA81	NonBrain	0.0165431	0.0396639	0.0107339	2.39761	0.648846	0.0365474	1.33e-08	1.29e-08	1.03128	0.151205
Calcium	30680	NonBrain	pons	Tissue_Fantom60	Brain	0.0621481	0.05112	0.00909607	0.822551	0.146361	0.22609	-2.22e-09	3.11e-09	-0.713808	0.762327
Calcium	30680	NonBrain	postcentral_gyrus	Tissue_Fantom60	Brain	0.0690916	0.047526	0.00590142	0.68787	0.0854144	0.00023394	-5.72e-09	1.77e-09	-3.23121	0.999384
Calcium	30680	NonBrain	prostate	Tissue_Fantom60	NonBrain	0.0363825	0.040782	0.00597545	1.12092	0.16424	0.460175	-2.48e-09	3.33e-09	-0.745846	0.77212
Calcium	30680	NonBrain	prostatic_glandular_cells	SC_HPA81	NonBrain	0.0289204	0.0432972	0.0150721	1.49712	0.521159	0.340575	5.21e-09	1.02e-08	0.508818	0.30544
Calcium	30680	NonBrain	proximal_enterocytes	SC_HPA81	NonBrain	0.0154134	0.0244857	0.00626022	1.58859	0.406153	0.148299	2.63e-09	8.06e-09	0.326031	0.3722
Calcium	30680	NonBrain	proximal_tubular_cells	SC_HPA81	NonBrain	0.017641	0.0240475	0.00692949	1.36316	0.392805	0.358043	-1.14e-09	7.68e-09	-0.148411	0.558991
Calcium	30680	NonBrain	putamen	Tissue_Fantom60	Brain	0.0674164	0.0435109	0.0058962	0.645406	0.0874594	4.24e-05	-3.89e-09	1.75e-09	-2.22121	0.986831
Calcium	30680	NonBrain	retina	Tissue_Fantom60	NonBrain	0.0485119	0.0619813	0.00779218	1.27765	0.160624	0.0854337	1.82e-09	3.22e-09	0.566125	0.285654
Calcium	30680	NonBrain	rod_photoreceptor_cells	SC_HPA81	NonBrain	0.0323409	0.0397296	0.00921164	1.22847	0.28483	0.421396	-2.99e-09	5.79e-09	-0.515884	0.697032
Calcium	30680	NonBrain	salivary_duct_cells	SC_HPA81	NonBrain	0.0326873	0.0578002	0.0123768	1.76828	0.378642	0.0476571	7.59e-09	7.77e-09	0.976931	0.164302
Calcium	30680	NonBrain	salivary_gland	Tissue_Fantom60	NonBrain	0.0259443	0.0468768	0.0102776	1.80682	0.396142	0.0445268	1.01e-08	7.76e-09	1.29865	0.0970326
Calcium	30680	NonBrain	schwann_cells	SC_HPA81	NonBrain	0.03102	0.0413782	0.00743919	1.33392	0.239819	0.16261	-5.43e-10	4.8e-09	-0.11322	0.545072
Calcium	30680	NonBrain	secretory_cells	SC_HPA81	NonBrain	0.0188797	0.0356685	0.00722187	1.88925	0.38252	0.0213681	7.08e-09	7.41e-09	0.954667	0.169873
Calcium	30680	NonBrain	seminal_vesicle	Tissue_Fantom60	NonBrain	0.0379876	0.0696612	0.0148521	1.83379	0.390974	0.0365315	1.27e-08	8.02e-09	1.58785	0.0561607
Calcium	30680	NonBrain	serous_glandular_cells	SC_HPA81	NonBrain	0.0248953	0.0347691	0.00751599	1.39661	0.301904	0.186255	1.79e-09	5.99e-09	0.299735	0.382189
Calcium	30680	NonBrain	sertoli_cells	SC_HPA81	NonBrain	0.0221085	0.0280188	0.00618964	1.26733	0.279967	0.333229	-1.69e-09	5.7e-09	-0.29664	0.616629
Calcium	30680	NonBrain	skeletal_muscle	Tissue_Fantom60	NonBrain	0.0308145	0.0373521	0.00626624	1.21216	0.203354	0.296038	-1.84e-09	4.02e-09	-0.458736	0.676788
Calcium	30680	NonBrain	skeletal_myocytes	SC_HPA81	NonBrain	0.0285471	0.031093	0.00599417	1.08918	0.209975	0.670814	-4.3e-09	4.2e-09	-1.02275	0.846786
Calcium	30680	NonBrain	small_intestine	Tissue_Fantom60	NonBrain	0.0248393	0.0419836	0.00982089	1.69021	0.395377	0.0859652	7.05e-09	7.88e-09	0.894109	0.185632
Calcium	30680	NonBrain	smooth_muscle	Tissue_Fantom60	NonBrain	0.0467238	0.044664	0.00688485	0.955916	0.147352	0.765301	-5.52e-09	2.98e-09	-1.8558	0.968259
Calcium	30680	NonBrain	smooth_muscle_cells	SC_HPA81	NonBrain	0.0320528	0.0495127	0.0114274	1.54472	0.356517	0.122682	4.69e-09	7.19e-09	0.652595	0.257009
Calcium	30680	NonBrain	spermatocytes	SC_HPA81	NonBrain	0.0195796	0.0344659	0.00925025	1.7603	0.472444	0.114206	8.36e-09	9.48e-09	0.881813	0.188939
Calcium	30680	NonBrain	spermatogonia	SC_HPA81	NonBrain	0.0181884	0.0284553	0.00666127	1.56448	0.366237	0.123521	-1.69e-10	7.34e-09	-0.0230114	0.509179
Calcium	30680	NonBrain	spinal_cord	Tissue_Fantom60	Brain	0.0554796	0.0411019	0.00617944	0.740847	0.111382	0.0222484	-6.3e-09	2.33e-09	-2.70817	0.996617
Calcium	30680	NonBrain	splatter	SC_Siletti31	Brain	0.121208	0.166875	0.0154183	1.37677	0.127205	0.00248108	-1.7e-09	3.02e-09	-0.562216	0.713015
Calcium	30680	NonBrain	spleen	Tissue_Fantom60	NonBrain	0.0226386	0.0391417	0.0102941	1.72899	0.454716	0.114564	5.27e-09	8.68e-09	0.606915	0.271954
Calcium	30680	NonBrain	squamous_epithelial_cells	SC_HPA81	NonBrain	0.0154014	0.0400491	0.0104081	2.60036	0.675792	0.0206122	2.22e-08	1.35e-08	1.64468	0.0500181
Calcium	30680	NonBrain	substantia_nigra	Tissue_Fantom60	Brain	0.0493107	0.0313756	0.00531366	0.636284	0.107759	0.00127757	-1.09e-08	2.38e-09	-4.55547	0.999997
Calcium	30680	NonBrain	suprabasal_keratinocytes	SC_HPA81	NonBrain	0.0171738	0.0227442	0.00517116	1.32435	0.301107	0.277213	-3.16e-09	5.93e-09	-0.532038	0.70265
Calcium	30680	NonBrain	syncytiotrophoblasts	SC_HPA81	NonBrain	0.0201132	0.0350334	0.00735421	1.74181	0.365641	0.0436853	3.87e-09	7.17e-09	0.539223	0.294867
Calcium	30680	NonBrain	t_cells	SC_HPA81	NonBrain	0.0204205	0.0325023	0.00682947	1.59165	0.334442	0.0752282	3.71e-11	6.76e-09	0.00548855	0.49781
Calcium	30680	NonBrain	temporal_cortex	Tissue_Fantom60	Brain	0.0635826	0.0391268	0.00603856	0.615369	0.0949719	0.000102173	-7.89e-09	2.18e-09	-3.61309	0.999849
Calcium	30680	NonBrain	testis	Tissue_Fantom60	NonBrain	0.0235459	0.0346553	0.00765145	1.47182	0.324958	0.141824	1.27e-09	6.53e-09	0.194053	0.423067
Calcium	30680	NonBrain	thalamic_excitatory	SC_Siletti31	Brain	0.133378	0.182119	0.0184797	1.36543	0.138551	0.00734291	1.77e-09	3.35e-09	0.527769	0.29883
Calcium	30680	NonBrain	thalamus	Tissue_Fantom60	Brain	0.0588518	0.0414563	0.00587353	0.704419	0.099802	0.0044494	-8.15e-09	2.19e-09	-3.72008	0.9999
Calcium	30680	NonBrain	thymus	Tissue_Fantom60	NonBrain	0.0230509	0.0314173	0.00754037	1.36295	0.327118	0.271807	-3.6e-09	6.31e-09	-0.570546	0.715846
Calcium	30680	NonBrain	thyroid_gland	Tissue_Fantom60	NonBrain	0.0323221	0.0356736	0.00606185	1.10369	0.187545	0.580605	-2.55e-09	3.77e-09	-0.677261	0.75088
Calcium	30680	NonBrain	tongue	Tissue_Fantom60	NonBrain	0.0223478	0.0369004	0.00664622	1.65118	0.297399	0.0319106	6.3e-09	5.89e-09	1.0696	0.1424
Calcium	30680	NonBrain	tonsil	Tissue_Fantom60	NonBrain	0.0178638	0.0352791	0.0133004	1.97489	0.744546	0.193544	5.38e-09	1.43e-08	0.375103	0.353792
Calcium	30680	NonBrain	undifferentiated_cells	SC_HPA81	NonBrain	0.0159826	0.0267262	0.00856016	1.67221	0.535592	0.210453	3.38e-09	1.08e-08	0.313819	0.376829
Calcium	30680	NonBrain	upper_layer_intratelencephalic	SC_Siletti31	Brain	0.12668	0.19235	0.0154249	1.5184	0.121763	3.34e-05	2.37e-09	2.71e-09	0.874701	0.190868
Calcium	30680	NonBrain	upper_rhombic_lip	SC_Siletti31	Brain	0.104736	0.185801	0.0152652	1.774	0.14575	2.59e-07	2.33e-09	3.06e-09	0.75988	0.223663
Calcium	30680	NonBrain	urinary_bladder	Tissue_Fantom60	NonBrain	0.0360071	0.0376087	0.00702286	1.04448	0.195041	0.819035	-5.25e-09	3.96e-09	-1.32612	0.9076
Calcium	30680	NonBrain	vagina	Tissue_Fantom60	NonBrain	0.0370658	0.0465821	0.0074599	1.25674	0.201261	0.197291	-1.74e-09	4.09e-09	-0.424748	0.66449
Calcium	30680	NonBrain	vascular	SC_Siletti31	Brain	0.108495	0.25597	0.0183755	2.35929	0.169367	3.39e-12	9.21e-09	4.16e-09	2.21131	0.0135074
Cholesterol	30690	NonBrain	adipocytes	SC_HPA81	NonBrain	0.0324001	0.0469678	0.0129246	1.44962	0.398906	0.256795	6.84e-10	6.87e-09	0.0994484	0.460391
Cholesterol	30690	NonBrain	adipose_tissue	Tissue_Fantom60	NonBrain	0.0370175	0.0309968	0.00570221	0.837355	0.154041	0.294191	-7.36e-09	2.94e-09	-2.50653	0.993904
Cholesterol	30690	NonBrain	alveolar_cells_type_1	SC_HPA81	NonBrain	0.029222	0.0363718	0.0102752	1.24467	0.351626	0.48076	-6.04e-09	6.13e-09	-0.985995	0.837932
Cholesterol	30690	NonBrain	alveolar_cells_type_2	SC_HPA81	NonBrain	0.0281096	0.0357091	0.0105993	1.27035	0.377072	0.468332	-5.49e-09	6.38e-09	-0.860348	0.805201
Cholesterol	30690	NonBrain	amygdala	Tissue_Fantom60	Brain	0.0845482	0.0405408	0.0080558	0.4795	0.0952806	1.83e-06	-4.25e-09	1.82e-09	-2.33406	0.990204
Cholesterol	30690	NonBrain	amygdala_excitatory	SC_Siletti31	Brain	0.152877	0.22865	0.0257865	1.49565	0.168675	0.00400082	4.74e-09	3.42e-09	1.38811	0.0825516
Cholesterol	30690	NonBrain	appendix	Tissue_Fantom60	NonBrain	0.0220803	0.0228138	0.00977959	1.03322	0.442911	0.940086	-1.22e-08	8.07e-09	-1.50875	0.934318
Cholesterol	30690	NonBrain	astrocyte	SC_Siletti31	Brain	0.119646	0.229686	0.0292901	1.91972	0.244808	0.000168358	1.45e-09	4.38e-09	0.331033	0.37031
Cholesterol	30690	NonBrain	astrocytes	SC_HPA81	Brain	0.0932178	0.0631232	0.0142609	0.677158	0.152985	0.039719	-3.77e-09	2.87e-09	-1.31313	0.90543
Cholesterol	30690	NonBrain	b_cells	SC_HPA81	NonBrain	0.0223649	0.0304251	0.0102054	1.36039	0.456313	0.423891	-4.45e-09	8.15e-09	-0.545816	0.707404
Cholesterol	30690	NonBrain	basal_keratinocytes	SC_HPA81	NonBrain	0.0193858	0.0354939	0.0288931	1.83092	1.49042	0.57603	6.8e-09	2.58e-08	0.263838	0.395952
Cholesterol	30690	NonBrain	basal_prostatic_cells	SC_HPA81	NonBrain	0.0245169	0.0323799	0.00582743	1.32072	0.23769	0.17435	-3.2e-09	3.91e-09	-0.818655	0.793508
Cholesterol	30690	NonBrain	basal_respiratory_cells	SC_HPA81	NonBrain	0.0150588	0.0133937	0.00557512	0.889429	0.370223	0.763531	-1.23e-08	6.54e-09	-1.87765	0.969785
Cholesterol	30690	NonBrain	basal_squamous_epithelial_cells	SC_HPA81	NonBrain	0.0193268	0.025857	0.00951472	1.33788	0.492308	0.49044	-2.55e-09	8.24e-09	-0.308804	0.621265
Cholesterol	30690	NonBrain	bergmann_glia	SC_Siletti31	Brain	0.116902	0.239276	0.0383622	2.0468	0.328157	0.00186005	5.82e-09	5.78e-09	1.00636	0.157122
Cholesterol	30690	NonBrain	bipolar_cells	SC_HPA81	NonBrain	0.0309354	0.0308415	0.0063547	0.996965	0.205418	0.988109	-6.63e-09	3.64e-09	-1.82096	0.965694
Cholesterol	30690	NonBrain	breast	Tissue_Fantom60	NonBrain	0.0294	0.030818	0.00605163	1.04823	0.205838	0.813014	-6.13e-09	3.71e-09	-1.65334	0.950869
Cholesterol	30690	NonBrain	breast_glandular_cells	SC_HPA81	NonBrain	0.0196947	0.0271775	0.00727268	1.37994	0.369272	0.297723	-3.94e-09	5.81e-09	-0.677356	0.75091
Cholesterol	30690	NonBrain	breast_myoepithelial_cells	SC_HPA81	NonBrain	0.0160611	0.0258357	0.0114934	1.60858	0.715603	0.391055	-2.84e-10	1.2e-08	-0.0237259	0.509464
Cholesterol	30690	NonBrain	cardiomyocytes	SC_HPA81	NonBrain	0.0300831	0.0390366	0.0144403	1.29763	0.480014	0.533072	2.98e-09	8.47e-09	0.352216	0.362338
Cholesterol	30690	NonBrain	caudate	Tissue_Fantom60	Brain	0.0752949	0.0532974	0.00946041	0.707849	0.125645	0.0187625	5.86e-11	2.23e-09	0.026226	0.489539
Cholesterol	30690	NonBrain	cerebellar_inhibitory	SC_Siletti31	Brain	0.115841	0.238154	0.0363693	2.05587	0.313959	0.00105579	7.91e-09	5.44e-09	1.45424	0.0729395
Cholesterol	30690	NonBrain	cerebellum	Tissue_Fantom60	Brain	0.0657439	0.0338689	0.00690463	0.515165	0.105023	4.42e-05	-7.29e-09	2.02e-09	-3.6188	0.999852
Cholesterol	30690	NonBrain	cervix	Tissue_Fantom60	NonBrain	0.0404433	0.0467217	0.0132019	1.15524	0.32643	0.631923	-1.16e-09	5.87e-09	-0.197601	0.578321
Cholesterol	30690	NonBrain	cge_interneuron	SC_Siletti31	Brain	0.123059	0.221963	0.0339735	1.80371	0.276075	0.00557234	4.96e-09	4.92e-09	1.0085	0.156608
Cholesterol	30690	NonBrain	cholangiocytes	SC_HPA81	NonBrain	0.0226013	0.0277764	0.00644409	1.22897	0.28512	0.417624	-4.49e-09	4.9e-09	-0.915896	0.820139
Cholesterol	30690	NonBrain	choroid_plexus	SC_Siletti31	Brain	0.121924	0.194714	0.0211114	1.59701	0.173152	0.0009143	-3.56e-09	4.01e-09	-0.887176	0.812508
Cholesterol	30690	NonBrain	ciliated_cells	SC_HPA81	NonBrain	0.0300326	0.0312639	0.00991334	1.041	0.330086	0.900785	-6.51e-09	6.08e-09	-1.06971	0.857626
Cholesterol	30690	NonBrain	club_cells	SC_HPA81	NonBrain	0.0229831	0.0262742	0.00601381	1.1432	0.261662	0.581461	-5.46e-09	4.64e-09	-1.17561	0.880124
Cholesterol	30690	NonBrain	collecting_duct_cells	SC_HPA81	NonBrain	0.0219298	0.0410901	0.0107525	1.87371	0.490314	0.081415	7.46e-09	8.67e-09	0.860301	0.194812
Cholesterol	30690	NonBrain	colon	Tissue_Fantom60	NonBrain	0.0261706	0.041633	0.0102624	1.59083	0.392135	0.133118	4.09e-09	6.83e-09	0.599507	0.274417
Cholesterol	30690	NonBrain	committed_oligodendrocyte_precursor	SC_Siletti31	Brain	0.117432	0.226853	0.0270497	1.93178	0.230343	0.00013304	-6.99e-10	4.64e-09	-0.150517	0.559822
Cholesterol	30690	NonBrain	cone_photoreceptor_cells	SC_HPA81	NonBrain	0.0314326	0.0334729	0.00669815	1.06491	0.213095	0.759138	-3.7e-09	3.83e-09	-0.966073	0.832996
Cholesterol	30690	NonBrain	corpus_callosum	Tissue_Fantom60	Brain	0.0557341	0.0716668	0.0148372	1.28587	0.266214	0.281811	2.91e-09	4.82e-09	0.603283	0.27316
Cholesterol	30690	NonBrain	cytotrophoblasts	SC_HPA81	NonBrain	0.0174654	0.0280658	0.00881582	1.60694	0.504759	0.231138	6.7e-10	8.49e-09	0.0789989	0.468517
Cholesterol	30690	NonBrain	deep_layer_corticothalamic_and_6b	SC_Siletti31	Brain	0.141697	0.203092	0.0275612	1.43328	0.194508	0.026094	1.85e-09	3.82e-09	0.484359	0.314065
Cholesterol	30690	NonBrain	deep_layer_intratelencephalic	SC_Siletti31	Brain	0.135613	0.199622	0.0236536	1.47199	0.17442	0.0105258	9.89e-10	3.81e-09	0.259586	0.397592
Cholesterol	30690	NonBrain	deep_layer_near_projecting	SC_Siletti31	Brain	0.131748	0.236201	0.0297984	1.79282	0.226177	0.000928599	7.69e-09	4.32e-09	1.78014	0.0375263
Cholesterol	30690	NonBrain	dendritic_cells	SC_HPA81	NonBrain	0.0229642	0.0315352	0.00733753	1.37324	0.319521	0.231029	-6.46e-09	5.67e-09	-1.14059	0.87298
Cholesterol	30690	NonBrain	distal_enterocytes	SC_HPA81	NonBrain	0.0181986	0.0358346	0.0110643	1.96908	0.607974	0.111144	6.01e-09	1.06e-08	0.56579	0.285768
Cholesterol	30690	NonBrain	distal_tubular_cells	SC_HPA81	NonBrain	0.0128975	0.022075	0.00755955	1.71157	0.586126	0.22782	4.44e-09	1.02e-08	0.433984	0.33215
Cholesterol	30690	NonBrain	ductal_cells	SC_HPA81	NonBrain	0.0188561	0.0292552	0.00938426	1.5515	0.497679	0.271242	-2.46e-10	8.37e-09	-0.0294428	0.511744
Cholesterol	30690	NonBrain	ductus_deferens	Tissue_Fantom60	NonBrain	0.0337829	0.0318562	0.00733315	0.94297	0.217067	0.791435	-5.93e-09	3.94e-09	-1.50614	0.933985
Cholesterol	30690	NonBrain	early_spermatids	SC_HPA81	NonBrain	0.0234498	0.00682046	0.00432171	0.290854	0.184296	0.000432541	-1.47e-08	3.59e-09	-4.07679	0.999977
Cholesterol	30690	NonBrain	eccentric_medium_spiny_neuron	SC_Siletti31	Brain	0.13994	0.183552	0.0194026	1.31165	0.13865	0.0264484	-1.12e-09	2.84e-09	-0.393888	0.653168
Cholesterol	30690	NonBrain	endometrial_stromal_cells	SC_HPA81	NonBrain	0.0307095	0.025372	0.00694464	0.826196	0.22614	0.439853	-9.27e-09	4.08e-09	-2.27274	0.988479
Cholesterol	30690	NonBrain	endometrium	Tissue_Fantom60	NonBrain	0.052117	0.0705612	0.0152932	1.3539	0.293439	0.226671	2.82e-09	5.36e-09	0.526355	0.299321
Cholesterol	30690	NonBrain	endothelial_cells	SC_HPA81	NonBrain	0.0343071	0.0441157	0.0130949	1.28591	0.381696	0.449853	-1.68e-09	6.46e-09	-0.259936	0.602543
Cholesterol	30690	NonBrain	enteroendocrine_cells	SC_HPA81	NonBrain	0.0198909	0.0369102	0.00998972	1.85563	0.502225	0.0933548	5.18e-09	8.48e-09	0.611724	0.27036
Cholesterol	30690	NonBrain	ependymal	SC_Siletti31	Brain	0.112796	0.199982	0.0262729	1.77295	0.232923	0.00202087	-2.06e-09	5.21e-09	-0.395772	0.653863
Cholesterol	30690	NonBrain	epididymis	Tissue_Fantom60	NonBrain	0.035524	0.0389692	0.0087555	1.09698	0.246467	0.692018	-2.01e-09	4.42e-09	-0.453625	0.674951
Cholesterol	30690	NonBrain	erythroid_cells	SC_HPA81	NonBrain	0.0152376	0.0166091	0.00867904	1.09	0.569579	0.873893	-1.19e-08	1.04e-08	-1.14383	0.873653
Cholesterol	30690	NonBrain	esophagus	Tissue_Fantom60	NonBrain	0.0233245	0.0286971	0.00858065	1.23034	0.367882	0.528144	-3.69e-09	6.22e-09	-0.592894	0.723374
Cholesterol	30690	NonBrain	excitatory_neurons	SC_HPA81	Brain	0.124029	0.0624686	0.0137779	0.503661	0.111086	4.32e-05	-3.65e-09	2.17e-09	-1.6831	0.953823
Cholesterol	30690	NonBrain	exocrine_glandular_cells	SC_HPA81	NonBrain	0.0166966	0.0310045	0.00994561	1.85694	0.595668	0.147901	1.01e-09	1.02e-08	0.0994692	0.460383
Cholesterol	30690	NonBrain	extravillous_trophoblasts	SC_HPA81	NonBrain	0.0168746	0.0192713	0.00635781	1.14203	0.376769	0.705536	-8.71e-09	6.6e-09	-1.31993	0.90657
Cholesterol	30690	NonBrain	fibroblast	SC_Siletti31	Brain	0.120058	0.291676	0.0441322	2.42946	0.36759	0.000284632	8.7e-09	7.11e-09	1.22312	0.110642
Cholesterol	30690	NonBrain	fibroblasts	SC_HPA81	NonBrain	0.0327441	0.0354593	0.0087459	1.08292	0.267098	0.754045	-4.28e-09	4.64e-09	-0.922064	0.821752
Cholesterol	30690	NonBrain	frontal_lobe	Tissue_Fantom60	Brain	0.0907069	0.0514685	0.00848336	0.567416	0.093525	2.61e-05	-2.19e-09	1.7e-09	-1.2898	0.90144
Cholesterol	30690	NonBrain	gallbladder	Tissue_Fantom60	NonBrain	0.032846	0.0485289	0.0102847	1.47747	0.313118	0.130943	2.73e-09	5.55e-09	0.491892	0.311398
Cholesterol	30690	NonBrain	gastric_mucus_secreting_cells	SC_HPA81	NonBrain	0.0203007	0.0719182	0.019855	3.54264	0.978044	0.0124643	3.31e-08	1.7e-08	1.9516	0.0254926
Cholesterol	30690	NonBrain	glandular_and_luminal_cells	SC_HPA81	NonBrain	0.0296382	0.0404807	0.0103164	1.36583	0.348079	0.289773	-1.73e-09	6.15e-09	-0.280592	0.610488
Cholesterol	30690	NonBrain	globus_pallidus	Tissue_Fantom60	Brain	0.0547387	0.0397385	0.00783075	0.725967	0.143057	0.0581597	-6.23e-09	2.62e-09	-2.37976	0.991338
Cholesterol	30690	NonBrain	granulocytes	SC_HPA81	NonBrain	0.0256477	0.0310437	0.00776856	1.21039	0.302895	0.486487	-3.73e-09	5.32e-09	-0.701121	0.758386
Cholesterol	30690	NonBrain	granulosa_cells	SC_HPA81	NonBrain	0.0206347	0.0293388	0.00748342	1.42182	0.362661	0.236129	6.99e-10	6.13e-09	0.114065	0.454593
Cholesterol	30690	NonBrain	heart_muscle	Tissue_Fantom60	NonBrain	0.0309227	0.0459501	0.0146127	1.48597	0.472557	0.304949	3.89e-09	8.42e-09	0.462315	0.321928
Cholesterol	30690	NonBrain	hepatocytes	SC_HPA81	NonBrain	0.0180025	0.0381177	0.0128693	2.11735	0.714858	0.11385	8.45e-09	1.25e-08	0.676181	0.249463
Cholesterol	30690	NonBrain	hippocampal_ca1_3	SC_Siletti31	Brain	0.139935	0.217014	0.0266714	1.55082	0.190599	0.00567433	4.96e-09	3.77e-09	1.31375	0.0944646
Cholesterol	30690	NonBrain	hippocampal_ca4	SC_Siletti31	Brain	0.138661	0.191869	0.0194684	1.38373	0.140403	0.00811735	4.37e-10	2.69e-09	0.162183	0.435581
Cholesterol	30690	NonBrain	hippocampal_dentate_gyrus	SC_Siletti31	Brain	0.133482	0.213928	0.0259698	1.60267	0.194556	0.00245866	5.27e-09	3.89e-09	1.35435	0.0878119
Cholesterol	30690	NonBrain	hippocampus	Tissue_Fantom60	Brain	0.0786124	0.0370352	0.00732584	0.471112	0.0931893	8.83e-07	-4.5e-09	1.78e-09	-2.53471	0.994373
Cholesterol	30690	NonBrain	hofbauer_cells	SC_HPA81	NonBrain	0.0165255	0.0240701	0.0072912	1.45655	0.441209	0.304503	-6.1e-09	8.26e-09	-0.739032	0.770056
Cholesterol	30690	NonBrain	horizontal_cells	SC_HPA81	NonBrain	0.0305721	0.0460881	0.0166994	1.50752	0.546232	0.350852	1.92e-09	9.34e-09	0.20584	0.418458
Cholesterol	30690	NonBrain	inhibitory_neurons	SC_HPA81	Brain	0.130276	0.0601035	0.0113941	0.461354	0.0874611	3.35e-07	-4.11e-09	1.74e-09	-2.36401	0.990961
Cholesterol	30690	NonBrain	insular_cortex	Tissue_Fantom60	Brain	0.0878593	0.0483015	0.00863533	0.54976	0.098286	2.72e-05	-3.39e-09	1.83e-09	-1.85467	0.968178
Cholesterol	30690	NonBrain	intestinal_goblet_cells	SC_HPA81	NonBrain	0.0197096	0.0475406	0.0146078	2.41206	0.741152	0.0605993	1.38e-08	1.29e-08	1.07007	0.142293
Cholesterol	30690	NonBrain	ionocytes	SC_HPA81	NonBrain	0.0182453	0.0110256	0.0046043	0.604299	0.252356	0.126434	-1.75e-08	4.67e-09	-3.74619	0.99991
Cholesterol	30690	NonBrain	kidney	Tissue_Fantom60	NonBrain	0.0299752	0.0380081	0.00732669	1.26799	0.244425	0.269681	4.43e-10	4.37e-09	0.10145	0.459597
Cholesterol	30690	NonBrain	kupffer_cells	SC_HPA81	NonBrain	0.0210478	0.0487451	0.0138796	2.31593	0.659434	0.0438293	1.19e-08	1.14e-08	1.04455	0.148116
Cholesterol	30690	NonBrain	lamp5_lhx6_and_chandelier	SC_Siletti31	Brain	0.133661	0.191519	0.0304258	1.43287	0.227634	0.060293	7.83e-10	4.23e-09	0.185052	0.426594
Cholesterol	30690	NonBrain	langerhans_cells	SC_HPA81	NonBrain	0.0240163	0.0303006	0.00619291	1.26167	0.257863	0.301492	-3.67e-09	4.41e-09	-0.832014	0.797299
Cholesterol	30690	NonBrain	late_spermatids	SC_HPA81	NonBrain	0.0226307	0.0248939	0.00507469	1.10001	0.224239	0.653807	-6.01e-09	4.06e-09	-1.47859	0.930374
Cholesterol	30690	NonBrain	leydig_cells	SC_HPA81	NonBrain	0.0264408	0.0358702	0.00929328	1.35662	0.351475	0.307107	-1.05e-09	6.04e-09	-0.174712	0.569347
Cholesterol	30690	NonBrain	liver	Tissue_Fantom60	NonBrain	0.0203158	0.0358855	0.00931657	1.76638	0.458586	0.0915066	4.17e-09	7.83e-09	0.532824	0.297078
Cholesterol	30690	NonBrain	locus_coeruleus	Tissue_Fantom60	Brain	0.0599341	0.039392	0.00861924	0.657255	0.143812	0.0174141	-5.03e-09	2.45e-09	-2.05295	0.979961
Cholesterol	30690	NonBrain	lower_rhombic_lip	SC_Siletti31	Brain	0.12087	0.176928	0.0189442	1.46379	0.156733	0.00179821	-2.7e-09	3.24e-09	-0.831846	0.797252
Cholesterol	30690	NonBrain	lung	Tissue_Fantom60	NonBrain	0.0301121	0.0369464	0.0102003	1.22696	0.338743	0.498704	-1.35e-09	5.97e-09	-0.225843	0.589338
Cholesterol	30690	NonBrain	lymph_node	Tissue_Fantom60	NonBrain	0.0189373	0.028348	0.0114424	1.49695	0.604226	0.405824	-2.21e-09	1.04e-08	-0.212988	0.584332
Cholesterol	30690	NonBrain	lymphatic_endothelial_cells	SC_HPA81	NonBrain	0.0315142	0.0689497	0.0286979	2.1879	0.910634	0.193511	1.45e-08	1.62e-08	0.900127	0.184026
Cholesterol	30690	NonBrain	macrophages	SC_HPA81	NonBrain	0.0224929	0.0224814	0.00673929	0.999485	0.299618	0.998623	-1.06e-08	5.71e-09	-1.85605	0.968276
Cholesterol	30690	NonBrain	mammillary_body	SC_Siletti31	Brain	0.14141	0.166649	0.0191283	1.17848	0.135268	0.178364	-2.11e-09	2.87e-09	-0.734801	0.76877
Cholesterol	30690	NonBrain	medial_frontal_gyrus	Tissue_Fantom60	Brain	0.0906622	0.0513057	0.00869435	0.565899	0.0958983	4.9e-05	-3.08e-09	1.79e-09	-1.71777	0.957081
Cholesterol	30690	NonBrain	medial_temporal_gyrus	Tissue_Fantom60	Brain	0.0878218	0.0453073	0.00995392	0.5159	0.113342	2.56e-05	-3.4e-09	1.95e-09	-1.74596	0.959591
Cholesterol	30690	NonBrain	medium_spiny_neuron	SC_Siletti31	Brain	0.131058	0.184231	0.0226511	1.40572	0.172832	0.0256783	-6.67e-10	3.79e-09	-0.176087	0.569887
Cholesterol	30690	NonBrain	medulla_oblongata	Tissue_Fantom60	Brain	0.0543643	0.0431991	0.00894747	0.794623	0.164584	0.217086	-4.27e-09	2.97e-09	-1.43622	0.924531
Cholesterol	30690	NonBrain	melanocytes	SC_HPA81	NonBrain	0.0227456	0.0323088	0.0169016	1.42044	0.743073	0.570171	-1.39e-09	1.31e-08	-0.10628	0.54232
Cholesterol	30690	NonBrain	mesothelial_cells	SC_HPA81	NonBrain	0.0230784	0.0294852	0.00753106	1.27761	0.326325	0.387758	-4.42e-09	5.62e-09	-0.785446	0.783904
Cholesterol	30690	NonBrain	mge_interneuron	SC_Siletti31	Brain	0.133352	0.184613	0.0202558	1.3844	0.151897	0.0142871	-9.17e-10	3e-09	-0.305242	0.619909
Cholesterol	30690	NonBrain	microglia	SC_Siletti31	Brain	0.103532	0.278559	0.0353568	2.69055	0.341505	8.17e-07	1.13e-08	6.74e-09	1.675	0.0469674
Cholesterol	30690	NonBrain	microglial_cells	SC_HPA81	Brain	0.0849454	0.0739287	0.0150259	0.870309	0.176889	0.463871	-2.58e-09	3.39e-09	-0.761177	0.776724
Cholesterol	30690	NonBrain	midbrain_derived_inhibitory	SC_Siletti31	Brain	0.130064	0.214873	0.0226092	1.65205	0.173831	0.000389135	6.19e-09	3.29e-09	1.87922	0.0301074
Cholesterol	30690	NonBrain	miscellaneous	SC_Siletti31	Brain	0.145742	0.232565	0.0227846	1.59573	0.156335	0.000395974	4.54e-09	3.14e-09	1.44803	0.0738041
Cholesterol	30690	NonBrain	monocytes	SC_HPA81	NonBrain	0.0227323	0.0252348	0.00725444	1.11008	0.319124	0.727505	-9.59e-09	5.84e-09	-1.64317	0.949826
Cholesterol	30690	NonBrain	mucus_glandular_cells	SC_HPA81	NonBrain	0.0347379	0.0581709	0.0218708	1.67457	0.629595	0.280025	7.51e-09	1.13e-08	0.664302	0.253249
Cholesterol	30690	NonBrain	muller_glia_cells	SC_HPA81	Brain	0.0299485	0.0281357	0.00638556	0.939468	0.213218	0.774629	-6.63e-09	3.84e-09	-1.72564	0.957794
Cholesterol	30690	NonBrain	nk_cells	SC_HPA81	NonBrain	0.0211508	0.0312557	0.0104974	1.47776	0.496314	0.330657	-3.12e-09	9.02e-09	-0.345687	0.635211
Cholesterol	30690	NonBrain	nucleus_accumbens	Tissue_Fantom60	Brain	0.0863423	0.0473541	0.0079297	0.548446	0.0918402	1.07e-05	-3.18e-09	1.65e-09	-1.92779	0.973059
Cholesterol	30690	NonBrain	occipital_cortex	Tissue_Fantom60	Brain	0.0874619	0.0621343	0.00955763	0.710416	0.109278	0.00767225	-1.51e-09	1.99e-09	-0.756955	0.775462
Cholesterol	30690	NonBrain	occipital_lobe	Tissue_Fantom60	Brain	0.0744791	0.0374288	0.00710635	0.502541	0.0954139	1.82e-06	-4.04e-09	1.64e-09	-2.46239	0.993099
Cholesterol	30690	NonBrain	occipital_pole	Tissue_Fantom60	Brain	0.0640617	0.0543216	0.00802555	0.847958	0.125278	0.221668	-8.63e-10	2.32e-09	-0.372498	0.645239
Cholesterol	30690	NonBrain	olfactory_bulb	Tissue_Fantom60	Brain	0.0810752	0.0520128	0.00965919	0.641537	0.119139	0.00242954	-1.73e-09	2.15e-09	-0.802826	0.788962
Cholesterol	30690	NonBrain	oligodendrocyte	SC_Siletti31	Brain	0.110615	0.20049	0.0277886	1.81251	0.25122	0.000985123	8.3e-10	4.88e-09	0.170177	0.432435
Cholesterol	30690	NonBrain	oligodendrocyte_precursor	SC_Siletti31	Brain	0.143097	0.175704	0.026404	1.22787	0.184518	0.201981	-1.59e-09	3.85e-09	-0.412171	0.659893
Cholesterol	30690	NonBrain	oligodendrocyte_precursor_cells	SC_HPA81	Brain	0.118565	0.0720856	0.0150236	0.607982	0.126712	0.00316571	-1.98e-09	2.38e-09	-0.832857	0.797537
Cholesterol	30690	NonBrain	oligodendrocytes	SC_HPA81	Brain	0.0828181	0.0747724	0.0203171	0.90285	0.245322	0.691886	-3.47e-10	4.65e-09	-0.074654	0.529755
Cholesterol	30690	NonBrain	oocytes	SC_HPA81	NonBrain	0.0313899	0.0476254	0.0115806	1.51722	0.368928	0.155734	4.06e-09	6.26e-09	0.647416	0.258681
Cholesterol	30690	NonBrain	ovarian_stromal_cells	SC_HPA81	NonBrain	0.0184056	0.01679	0.00637311	0.912218	0.346259	0.798165	-9.47e-09	6.04e-09	-1.5676	0.941512
Cholesterol	30690	NonBrain	ovary	Tissue_Fantom60	NonBrain	0.0325276	0.0507311	0.0152907	1.55963	0.470085	0.234476	6.05e-09	8.41e-09	0.719159	0.236022
Cholesterol	30690	NonBrain	pancreas	Tissue_Fantom60	NonBrain	0.0245347	0.0291105	0.00585644	1.1865	0.238701	0.42594	-3.94e-09	4.25e-09	-0.92717	0.823081
Cholesterol	30690	NonBrain	pancreatic_endocrine_cells	SC_HPA81	NonBrain	0.0155013	0.0217835	0.00697553	1.40527	0.449995	0.365874	-6.4e-09	7.64e-09	-0.838007	0.798987
Cholesterol	30690	NonBrain	paneth_cells	SC_HPA81	NonBrain	0.0161898	0.037907	0.00721476	2.34141	0.445636	0.00465003	1.29e-08	7.93e-09	1.62468	0.0521159
Cholesterol	30690	NonBrain	paracentral_gyrus	Tissue_Fantom60	Brain	0.0819366	0.0464555	0.00843769	0.56697	0.102978	9.33e-05	-3.39e-09	1.89e-09	-1.79231	0.963458
Cholesterol	30690	NonBrain	parietal_lobe	Tissue_Fantom60	Brain	0.0870495	0.0463003	0.00830999	0.531884	0.0954628	1.06e-05	-4.3e-09	1.72e-09	-2.49285	0.993664
Cholesterol	30690	NonBrain	peritubular_cells	SC_HPA81	NonBrain	0.0281217	0.0291962	0.00696787	1.03821	0.247776	0.87637	-6.81e-09	4.53e-09	-1.50331	0.93362
Cholesterol	30690	NonBrain	pituitary_gland	Tissue_Fantom60	Brain	0.0577956	0.0476558	0.00820525	0.824556	0.14197	0.215996	-5.19e-10	2.47e-09	-0.209671	0.583038
Cholesterol	30690	NonBrain	placenta	Tissue_Fantom60	NonBrain	0.0290214	0.0566726	0.0231402	1.95279	0.797352	0.232394	1.09e-08	1.42e-08	0.76782	0.221297
Cholesterol	30690	NonBrain	plasma_cells	SC_HPA81	NonBrain	0.0165431	0.0193671	0.00535203	1.17071	0.323521	0.594281	-1.09e-08	5.75e-09	-1.90277	0.971464
Cholesterol	30690	NonBrain	pons	Tissue_Fantom60	Brain	0.0621481	0.0398416	0.00673368	0.641075	0.108349	0.00172401	-3.44e-09	1.85e-09	-1.85557	0.968242
Cholesterol	30690	NonBrain	postcentral_gyrus	Tissue_Fantom60	Brain	0.0690916	0.0410501	0.00793555	0.59414	0.114855	0.00101537	-4.69e-09	2.12e-09	-2.21135	0.986494
Cholesterol	30690	NonBrain	prostate	Tissue_Fantom60	NonBrain	0.0363825	0.0523832	0.0106349	1.43979	0.292308	0.133247	2.16e-09	5.17e-09	0.417452	0.338174
Cholesterol	30690	NonBrain	prostatic_glandular_cells	SC_HPA81	NonBrain	0.0289204	0.0332363	0.00713275	1.14923	0.246634	0.540606	-2.26e-09	4.38e-09	-0.514917	0.696694
Cholesterol	30690	NonBrain	proximal_enterocytes	SC_HPA81	NonBrain	0.0154134	0.0269799	0.00680434	1.75041	0.441455	0.0928559	3.03e-09	8.22e-09	0.36784	0.356496
Cholesterol	30690	NonBrain	proximal_tubular_cells	SC_HPA81	NonBrain	0.017641	0.0220836	0.00720711	1.25183	0.408542	0.536467	-3.27e-09	7.33e-09	-0.446958	0.672547
Cholesterol	30690	NonBrain	putamen	Tissue_Fantom60	Brain	0.0674164	0.0334358	0.00624386	0.495959	0.0926163	1.66e-06	-4.21e-09	1.7e-09	-2.48102	0.99345
Cholesterol	30690	NonBrain	retina	Tissue_Fantom60	NonBrain	0.0485119	0.0665929	0.0135951	1.37271	0.280243	0.185457	3.79e-09	5.14e-09	0.737441	0.230427
Cholesterol	30690	NonBrain	rod_photoreceptor_cells	SC_HPA81	NonBrain	0.0323409	0.0347342	0.00755024	1.074	0.233458	0.750141	-5.51e-09	4.12e-09	-1.33654	0.909313
Cholesterol	30690	NonBrain	salivary_duct_cells	SC_HPA81	NonBrain	0.0326873	0.0379941	0.00860209	1.16235	0.263163	0.532155	-4.35e-09	4.49e-09	-0.968934	0.833711
Cholesterol	30690	NonBrain	salivary_gland	Tissue_Fantom60	NonBrain	0.0259443	0.0291083	0.00556331	1.12195	0.214433	0.563125	-2.79e-09	3.75e-09	-0.744553	0.771729
Cholesterol	30690	NonBrain	schwann_cells	SC_HPA81	NonBrain	0.03102	0.0366953	0.0102754	1.18296	0.331251	0.577517	-3.21e-09	6.07e-09	-0.528088	0.701281
Cholesterol	30690	NonBrain	secretory_cells	SC_HPA81	NonBrain	0.0188797	0.0266889	0.00772497	1.41363	0.409167	0.306858	-3.07e-09	6.67e-09	-0.46033	0.67736
Cholesterol	30690	NonBrain	seminal_vesicle	Tissue_Fantom60	NonBrain	0.0379876	0.037931	0.00612045	0.998509	0.161117	0.992585	-2.7e-09	2.91e-09	-0.928552	0.823439
Cholesterol	30690	NonBrain	serous_glandular_cells	SC_HPA81	NonBrain	0.0248953	0.0175376	0.00614027	0.704455	0.246643	0.23788	-1.02e-08	4.48e-09	-2.28848	0.988945
Cholesterol	30690	NonBrain	sertoli_cells	SC_HPA81	NonBrain	0.0221085	0.0362973	0.0196548	1.64179	0.889017	0.468662	4.13e-09	1.53e-08	0.269777	0.393666
Cholesterol	30690	NonBrain	skeletal_muscle	Tissue_Fantom60	NonBrain	0.0308145	0.0511377	0.0139743	1.65953	0.453498	0.144932	6.08e-09	8.14e-09	0.747022	0.227525
Cholesterol	30690	NonBrain	skeletal_myocytes	SC_HPA81	NonBrain	0.0285471	0.0482328	0.0173447	1.68958	0.607583	0.252759	6.02e-09	1.08e-08	0.555618	0.289236
Cholesterol	30690	NonBrain	small_intestine	Tissue_Fantom60	NonBrain	0.0248393	0.0298767	0.00661177	1.2028	0.266182	0.44178	-3.11e-09	4.84e-09	-0.64257	0.739748
Cholesterol	30690	NonBrain	smooth_muscle	Tissue_Fantom60	NonBrain	0.0467238	0.0531145	0.0139363	1.13678	0.298269	0.644587	-1.61e-09	5.38e-09	-0.299279	0.617636
Cholesterol	30690	NonBrain	smooth_muscle_cells	SC_HPA81	NonBrain	0.0320528	0.0473278	0.0121129	1.47656	0.377903	0.204146	2.33e-09	6.35e-09	0.367543	0.356607
Cholesterol	30690	NonBrain	spermatocytes	SC_HPA81	NonBrain	0.0195796	0.0334806	0.0113533	1.70997	0.579855	0.232096	4.73e-09	1.04e-08	0.455271	0.324457
Cholesterol	30690	NonBrain	spermatogonia	SC_HPA81	NonBrain	0.0181884	0.036177	0.012692	1.98902	0.697809	0.167622	4.46e-09	1.21e-08	0.369213	0.355985
Cholesterol	30690	NonBrain	spinal_cord	Tissue_Fantom60	Brain	0.0554796	0.0439439	0.0125088	0.792073	0.225466	0.35598	-4.11e-09	4.08e-09	-1.00821	0.843324
Cholesterol	30690	NonBrain	splatter	SC_Siletti31	Brain	0.121208	0.173342	0.0162565	1.43012	0.134121	0.00149137	-3.57e-09	3.37e-09	-1.05865	0.855121
Cholesterol	30690	NonBrain	spleen	Tissue_Fantom60	NonBrain	0.0226386	0.0504886	0.0259594	2.23021	1.14669	0.281944	1.23e-08	2.02e-08	0.608501	0.271428
Cholesterol	30690	NonBrain	squamous_epithelial_cells	SC_HPA81	NonBrain	0.0154014	0.0217231	0.00884783	1.41047	0.574484	0.473929	-3.14e-09	9.26e-09	-0.339302	0.632809
Cholesterol	30690	NonBrain	substantia_nigra	Tissue_Fantom60	Brain	0.0493107	0.038696	0.0063996	0.784738	0.129781	0.107663	-6.12e-09	2.4e-09	-2.55122	0.994633
Cholesterol	30690	NonBrain	suprabasal_keratinocytes	SC_HPA81	NonBrain	0.0171738	0.0179827	0.0109354	1.0471	0.636747	0.940705	-8.73e-09	1.07e-08	-0.817325	0.793129
Cholesterol	30690	NonBrain	syncytiotrophoblasts	SC_HPA81	NonBrain	0.0201132	0.0246867	0.00829481	1.22739	0.412406	0.579566	-7.04e-09	7.06e-09	-0.997191	0.840664
Cholesterol	30690	NonBrain	t_cells	SC_HPA81	NonBrain	0.0204205	0.0247254	0.00938641	1.21081	0.459656	0.643966	-7.89e-09	8.3e-09	-0.950602	0.829097
Cholesterol	30690	NonBrain	temporal_cortex	Tissue_Fantom60	Brain	0.0635826	0.045933	0.0084402	0.722414	0.132744	0.0420722	-3.49e-09	2.44e-09	-1.43117	0.923809
Cholesterol	30690	NonBrain	testis	Tissue_Fantom60	NonBrain	0.0235459	0.0261316	0.00986308	1.10981	0.418887	0.790875	-7.41e-09	7.53e-09	-0.984728	0.837621
Cholesterol	30690	NonBrain	thalamic_excitatory	SC_Siletti31	Brain	0.133378	0.160167	0.0165786	1.20085	0.124297	0.105799	-3.23e-09	2.55e-09	-1.26796	0.897593
Cholesterol	30690	NonBrain	thalamus	Tissue_Fantom60	Brain	0.0588518	0.0458404	0.00795854	0.778913	0.13523	0.110103	-4.44e-09	2.46e-09	-1.79983	0.964056
Cholesterol	30690	NonBrain	thymus	Tissue_Fantom60	NonBrain	0.0230509	0.0303953	0.00779214	1.31862	0.338041	0.343052	-4.79e-09	6.05e-09	-0.790691	0.785438
Cholesterol	30690	NonBrain	thyroid_gland	Tissue_Fantom60	NonBrain	0.0323221	0.0366059	0.00958455	1.13254	0.296533	0.652216	-1.01e-09	5.17e-09	-0.195416	0.577467
Cholesterol	30690	NonBrain	tongue	Tissue_Fantom60	NonBrain	0.0223478	0.0325892	0.0166391	1.45827	0.744553	0.536065	1.06e-09	1.3e-08	0.0809913	0.467724
Cholesterol	30690	NonBrain	tonsil	Tissue_Fantom60	NonBrain	0.0178638	0.0245426	0.0119402	1.37387	0.668399	0.574254	-7.3e-09	1.14e-08	-0.637987	0.738259
Cholesterol	30690	NonBrain	undifferentiated_cells	SC_HPA81	NonBrain	0.0159826	0.0213867	0.00591781	1.33812	0.370265	0.358125	-4.19e-09	6.7e-09	-0.625712	0.734248
Cholesterol	30690	NonBrain	upper_layer_intratelencephalic	SC_Siletti31	Brain	0.12668	0.221286	0.0268015	1.74682	0.211569	0.00107617	4.87e-09	4.06e-09	1.20139	0.1148
Cholesterol	30690	NonBrain	upper_rhombic_lip	SC_Siletti31	Brain	0.104736	0.172793	0.0200484	1.6498	0.191419	0.0003836	-5.67e-09	4.34e-09	-1.30648	0.904305
Cholesterol	30690	NonBrain	urinary_bladder	Tissue_Fantom60	NonBrain	0.0360071	0.037272	0.00684386	1.03513	0.19007	0.852589	-5.46e-09	3.48e-09	-1.56962	0.941748
Cholesterol	30690	NonBrain	vagina	Tissue_Fantom60	NonBrain	0.0370658	0.0500736	0.0109252	1.35094	0.294751	0.229462	-1.28e-10	5.18e-09	-0.024621	0.509821
Cholesterol	30690	NonBrain	vascular	SC_Siletti31	Brain	0.108495	0.239606	0.0388547	2.20846	0.358125	0.000986893	-1.69e-09	6.61e-09	-0.255103	0.600678
Depression	20002_1286	Brain	adipocytes	SC_HPA81	NonBrain	0.0324001	0.0387563	0.0176218	1.19618	0.543882	0.71768	3.02e-10	1.45e-09	0.208843	0.417285
Depression	20002_1286	Brain	adipose_tissue	Tissue_Fantom60	NonBrain	0.0370175	0.0436036	0.0165069	1.17792	0.445921	0.689887	4.26e-10	1.19e-09	0.356907	0.360581
Depression	20002_1286	Brain	alveolar_cells_type_1	SC_HPA81	NonBrain	0.029222	0.0462025	0.0169896	1.58109	0.581396	0.310853	1.31e-09	1.51e-09	0.867797	0.192753
Depression	20002_1286	Brain	alveolar_cells_type_2	SC_HPA81	NonBrain	0.0281096	0.0314036	0.0176142	1.11718	0.626626	0.852121	1.33e-10	1.65e-09	0.0803968	0.467961
Depression	20002_1286	Brain	amygdala	Tissue_Fantom60	Brain	0.0845482	0.116705	0.0247681	1.38034	0.292947	0.195808	7.06e-10	8.13e-10	0.867602	0.192806
Depression	20002_1286	Brain	amygdala_excitatory	SC_Siletti31	Brain	0.152877	0.254864	0.0289989	1.66712	0.189688	0.000489714	2e-09	6e-10	3.3348	0.000426803
Depression	20002_1286	Brain	appendix	Tissue_Fantom60	NonBrain	0.0220803	0.0169997	0.0167739	0.769903	0.759679	0.762402	-4.41e-10	1.98e-09	-0.22322	0.588318
Depression	20002_1286	Brain	astrocyte	SC_Siletti31	Brain	0.119646	0.0910499	0.0251905	0.760997	0.210543	0.25445	-1.03e-09	6.34e-10	-1.62243	0.947644
Depression	20002_1286	Brain	astrocytes	SC_HPA81	Brain	0.0932178	0.062931	0.0247025	0.675096	0.264998	0.218992	-1.45e-09	7.51e-10	-1.92929	0.973152
Depression	20002_1286	Brain	b_cells	SC_HPA81	NonBrain	0.0223649	0.0556058	0.0159606	2.48629	0.713642	0.0348737	3.97e-09	1.83e-09	2.16718	0.0151106
Depression	20002_1286	Brain	basal_keratinocytes	SC_HPA81	NonBrain	0.0193858	0.0432028	0.020488	2.22857	1.05685	0.245078	3.12e-09	2.74e-09	1.13865	0.127425
Depression	20002_1286	Brain	basal_prostatic_cells	SC_HPA81	NonBrain	0.0245169	0.0172079	0.0140487	0.701879	0.573021	0.602856	-9.73e-10	1.51e-09	-0.645417	0.740672
Depression	20002_1286	Brain	basal_respiratory_cells	SC_HPA81	NonBrain	0.0150588	0.025205	0.0154451	1.67377	1.02565	0.51141	1.72e-09	2.66e-09	0.648613	0.258294
Depression	20002_1286	Brain	basal_squamous_epithelial_cells	SC_HPA81	NonBrain	0.0193268	0.0266757	0.0138915	1.38025	0.718772	0.596185	8.55e-10	1.85e-09	0.46153	0.322209
Depression	20002_1286	Brain	bergmann_glia	SC_Siletti31	Brain	0.116902	0.122132	0.0282855	1.04474	0.241959	0.85356	-1.88e-10	7.24e-10	-0.259117	0.602228
Depression	20002_1286	Brain	bipolar_cells	SC_HPA81	NonBrain	0.0309354	0.0304839	0.0144425	0.985405	0.466858	0.975071	-2.51e-10	1.23e-09	-0.203668	0.580693
Depression	20002_1286	Brain	breast	Tissue_Fantom60	NonBrain	0.0294	0.0324238	0.0133359	1.10285	0.453603	0.820859	7.94e-11	1.19e-09	0.0665536	0.473469
Depression	20002_1286	Brain	breast_glandular_cells	SC_HPA81	NonBrain	0.0196947	0.00855544	0.0132716	0.434404	0.673867	0.39836	-1.5e-09	1.75e-09	-0.857823	0.804505
Depression	20002_1286	Brain	breast_myoepithelial_cells	SC_HPA81	NonBrain	0.0160611	0.0115982	0.0109859	0.722131	0.684005	0.68474	-8.15e-10	1.78e-09	-0.457541	0.676359
Depression	20002_1286	Brain	cardiomyocytes	SC_HPA81	NonBrain	0.0300831	0.0211578	0.0141104	0.703314	0.469048	0.529178	-9.13e-10	1.23e-09	-0.739582	0.770223
Depression	20002_1286	Brain	caudate	Tissue_Fantom60	Brain	0.0752949	0.105447	0.0239246	1.40045	0.317745	0.207791	8.61e-10	8.69e-10	0.990809	0.16089
Depression	20002_1286	Brain	cerebellar_inhibitory	SC_Siletti31	Brain	0.115841	0.123528	0.0280681	1.06636	0.242299	0.784983	-2.17e-11	7.19e-10	-0.0301931	0.512043
Depression	20002_1286	Brain	cerebellum	Tissue_Fantom60	Brain	0.0657439	0.100406	0.0192246	1.52723	0.292416	0.0706283	1.14e-09	8.02e-10	1.42231	0.0774685
Depression	20002_1286	Brain	cervix	Tissue_Fantom60	NonBrain	0.0404433	0.0584256	0.021691	1.44463	0.53633	0.410586	8.8e-10	1.45e-09	0.607646	0.271711
Depression	20002_1286	Brain	cge_interneuron	SC_Siletti31	Brain	0.123059	0.176272	0.0285781	1.43242	0.232232	0.0636202	1.16e-09	7.15e-10	1.62309	0.0522852
Depression	20002_1286	Brain	cholangiocytes	SC_HPA81	NonBrain	0.0226013	0.0228422	0.0123629	1.01066	0.547	0.984465	3.63e-11	1.42e-09	0.0255082	0.489825
Depression	20002_1286	Brain	choroid_plexus	SC_Siletti31	Brain	0.121924	0.123151	0.0258446	1.01006	0.211973	0.962156	-9.2e-11	6.54e-10	-0.140787	0.555981
Depression	20002_1286	Brain	ciliated_cells	SC_HPA81	NonBrain	0.0300326	0.0370921	0.0171593	1.23506	0.571357	0.679787	6.61e-10	1.51e-09	0.438134	0.330645
Depression	20002_1286	Brain	club_cells	SC_HPA81	NonBrain	0.0229831	0.0427003	0.0171463	1.8579	0.74604	0.252589	2.1e-09	1.94e-09	1.07891	0.140314
Depression	20002_1286	Brain	collecting_duct_cells	SC_HPA81	NonBrain	0.0219298	0.01205	0.0132096	0.549479	0.602358	0.451797	-1.35e-09	1.55e-09	-0.867968	0.807294
Depression	20002_1286	Brain	colon	Tissue_Fantom60	NonBrain	0.0261706	0.0191977	0.0151487	0.73356	0.578846	0.646445	-6.16e-10	1.53e-09	-0.402222	0.65624
Depression	20002_1286	Brain	committed_oligodendrocyte_precursor	SC_Siletti31	Brain	0.117432	0.0903821	0.0272042	0.769653	0.231659	0.30934	-8.55e-10	6.8e-10	-1.25672	0.895573
Depression	20002_1286	Brain	cone_photoreceptor_cells	SC_HPA81	NonBrain	0.0314326	0.0281302	0.0157941	0.894935	0.502475	0.834464	-5.55e-10	1.33e-09	-0.418156	0.662083
Depression	20002_1286	Brain	corpus_callosum	Tissue_Fantom60	Brain	0.0557341	0.0695092	0.0202816	1.24716	0.363899	0.492391	2.89e-10	9.8e-10	0.295177	0.383929
Depression	20002_1286	Brain	cytotrophoblasts	SC_HPA81	NonBrain	0.0174654	0.00496393	0.0134733	0.284215	0.77143	0.353093	-1.94e-09	2.03e-09	-0.957169	0.830759
Depression	20002_1286	Brain	deep_layer_corticothalamic_and_6b	SC_Siletti31	Brain	0.141697	0.170551	0.0267464	1.20363	0.188758	0.280204	4.46e-10	6.07e-10	0.735619	0.230981
Depression	20002_1286	Brain	deep_layer_intratelencephalic	SC_Siletti31	Brain	0.135613	0.21315	0.0324335	1.57175	0.239162	0.0165631	1.53e-09	7.47e-10	2.04321	0.0205157
Depression	20002_1286	Brain	deep_layer_near_projecting	SC_Siletti31	Brain	0.131748	0.187817	0.0295623	1.42558	0.224385	0.0638244	1.14e-09	7.12e-10	1.60704	0.054023
Depression	20002_1286	Brain	dendritic_cells	SC_HPA81	NonBrain	0.0229642	0.0186258	0.0194549	0.811082	0.847184	0.822429	-4.61e-10	2.2e-09	-0.209691	0.583046
Depression	20002_1286	Brain	distal_enterocytes	SC_HPA81	NonBrain	0.0181986	0.00784506	0.011838	0.431079	0.650489	0.385504	-1.41e-09	1.7e-09	-0.827931	0.796145
Depression	20002_1286	Brain	distal_tubular_cells	SC_HPA81	NonBrain	0.0128975	0.00736349	0.0115761	0.570924	0.897546	0.632053	-1.02e-09	2.32e-09	-0.441187	0.670461
Depression	20002_1286	Brain	ductal_cells	SC_HPA81	NonBrain	0.0188561	-0.00606847	0.0114647	-0.321831	0.608009	0.0212522	-3.51e-09	1.45e-09	-2.41038	0.992032
Depression	20002_1286	Brain	ductus_deferens	Tissue_Fantom60	NonBrain	0.0337829	-0.00333826	0.0144099	-0.0988152	0.426544	0.00773347	-3.12e-09	1.09e-09	-2.85448	0.997845
Depression	20002_1286	Brain	early_spermatids	SC_HPA81	NonBrain	0.0234498	0.0110354	0.0130998	0.470595	0.558632	0.34813	-1.2e-09	1.48e-09	-0.815684	0.79266
Depression	20002_1286	Brain	eccentric_medium_spiny_neuron	SC_Siletti31	Brain	0.13994	0.167664	0.0286476	1.19811	0.204713	0.327193	3.22e-10	6.43e-10	0.50141	0.308041
[truncated: 5,459 more rows]

## Sheet: ST4
Geneset	Geneset_Type	Geneset_Cat	Geneset_SubCat	constraint_measure_LOEUF_topdecile	constraint_measure_pLI_topdecile	constraint_measure_missense_Z_topdecile	constraint_measure_s_het_topdecile	constraint_measure_CDS_topdecile	constraint_measure_pHaplo_topdecile	constraint_measure_pTriplo_topdecile	constraint_measure_GeneLenBP	functional_pleiotropy_deletion	functional_pleiotropy_duplication	functional_pleiotropy_GWASenrichment	constraint	normative_model_null_mean_fp_del	normative_model_null_mean_fp_dup	normative_model_null_sd_fp_del	normative_model_null_sd_fp_dup	normative_model_zscore_del_pleiotropy	normative_model_zscore_dup_pleiotropy	normative_model_centile_del_pleiotropy	normative_model_centile_dup_pleiotropy	gene_dosage_responses_count_total	gene_dosage_responses_count_nonmonotonic	gene_dosage_responses_count_monotonic	gene_dosage_responses_proportion_nonmonotonic	gene_dosage_responses_proportion_monotonic
[truncated: 172 more rows]

[truncated: 8 more sheets: ST5, ST6, ST7, ST8, ST9, ST10, ST11, ST12]
